# Supplementary material for: Systematic Assessment of Exposure Variations on Observed Bioactivity in Zebrafish Chemical Screening
Source: PubMed Central journal article supplement (PMC7712973; doi:10.3390/toxics8040087), 2020-10-14
Supplement: toxics-08-00087-s001.pdf [file toxics-08-00087-s001.pdf]

**Supplementary Material: Systematic Assessment of  
Exposure Variations on Observed Bioactivity in  
Zebrafish Chemical Screening**

**Lindsay B. Wilson, Lisa Truong, Michael T. Simonich, Robyn L. Tanguay**



















| Test Agent | Treatment | Replicate plate # | Concentration | Plate Barcode | MO24  | DP24  | SM24 | NC24 | MORT  | YSE_  | AXIS  | EYE_  | SNOU  | JAW_  | OTIC  | PE_   | BRAI  | SOMI | PFIN  | CFIN  | PIG_ | CIRC | TRUN  | SWIM  | NC_ | TR_   | .except.M | any.effect |
|------------|-----------|-------------------|---------------|---------------|-------|-------|------|------|-------|-------|-------|-------|-------|-------|-------|-------|-------|------|-------|-------|------|------|-------|-------|-----|-------|-----------|------------|
| Permethrin | Standard  | 1                 | 0             | 18709         | 8.33  | 0     | 0    | 0    | 8.33  | 0     | 0     | 0     | 0     | 0     | 0     | 0     | 0     | 0    | 0     | 0     | 0    | 0    | 0     | 0     | 0   | 0     | 0         | 8.33       |
| Permethrin | Standard  | 1                 | 1             | 18709         | 16.67 | 10    | 0    | 0    | 25    | 0     | 11.11 | 0     | 0     | 0     | 0     | 0     | 0     | 0    | 0     | 11.11 | 0    | 0    | 11.11 | 0     | 0   | 0     | 10        | 33.33      |
| Permethrin | Standard  | 1                 | 2.54          | 18709         | 8.33  | 9.09  | 0    | 0    | 16.67 | 0     | 0     | 0     | 0     | 0     | 0     | 0     | 0     | 0    | 0     | 0     | 0    | 0    | 0     | 0     | 0   | 0     | 9.09      | 16.67      |
| Permethrin | Standard  | 1                 | 5             | 18709         | 33.33 | 0     | 0    | 0    | 33.33 | 12.5  | 25    | 25    | 25    | 25    | 0     | 25    | 12.5  | 0    | 25    | 12.5  | 0    | 0    | 0     | 0     | 0   | 12.5  | 50        | 66.67      |
| Permethrin | Standard  | 1                 | 8             | 18709         | 33.33 | 0     | 0    | 0    | 50    | 0     | 0     | 16.67 | 16.67 | 0     | 0     | 0     | 0     | 0    | 0     | 0     | 0    | 0    | 0     | 0     | 0   | 0     | 12.5      | 58.33      |
| Permethrin | Standard  | 1                 | 12            | 18709         | 8.33  | 0     | 0    | 0    | 8.33  | 0     | 27.27 | 0     | 27.27 | 36.36 | 0     | 9.09  | 9.09  | 0    | 9.09  | 0     | 0    | 0    | 18.18 | 0     | 0   | 27.27 | 63.64     | 66.67      |
| Permethrin | Standard  | 1                 | 16.4          | 18709         | 16.67 | 20    | 0    | 0    | 25    | 0     | 33.33 | 0     | 11.11 | 11.11 | 0     | 0     | 0     | 0    | 0     | 11.11 | 0    | 0    | 0     | 0     | 0   | 0     | 60        | 66.67      |
| Permethrin | Standard  | 1                 | 35            | 18709         | 8.33  | 0     | 0    | 0    | 16.67 | 10    | 70    | 0     | 50    | 50    | 0     | 30    | 20    | 0    | 10    | 0     | 0    | 0    | 10    | 0     | 0   | 10    | 81.82     | 91.67      |
| Permethrin | Standard  | 2                 | 0             | 18718         | 8.33  | 9.09  | 0    | 0    | 8.33  | 9.09  | 9.09  | 9.09  | 9.09  | 9.09  | 0     | 9.09  | 0     | 0    | 9.09  | 0     | 0    | 0    | 0     | 0     | 0   | 0     | 9.09      | 16.67      |
| Permethrin | Standard  | 2                 | 1             | 18718         | 33.33 | 12.5  | 0    | 0    | 33.33 | 12.5  | 12.5  | 12.5  | 12.5  | 12.5  | 0     | 12.5  | 0     | 0    | 12.5  | 0     | 0    | 0    | 12.5  | 0     | 0   | 0     | 12.5      | 41.67      |
| Permethrin | Standard  | 2                 | 2.54          | 18718         | 25    | 0     | 0    | 0    | 25    | 0     | 0     | 0     | 0     | 0     | 0     | 0     | 0     | 0    | 0     | 0     | 0    | 0    | 0     | 0     | 0   | 0     | 0         | 25         |
| Permethrin | Standard  | 2                 | 5             | 18718         | 16.67 | 10    | 0    | 0    | 16.67 | 0     | 10    | 10    | 0     | 0     | 0     | 0     | 0     | 0    | 0     | 0     | 0    | 0    | 10    | 0     | 0   | 0     | 20        | 33.33      |
| Permethrin | Standard  | 2                 | 8             | 18718         | 0     | 0     | 0    | 0    | 0     | 8.33  | 16.67 | 8.33  | 8.33  | 8.33  | 0     | 8.33  | 8.33  | 0    | 8.33  | 0     | 0    | 0    | 0     | 0     | 0   | 0     | 16.67     | 16.67      |
| Permethrin | Standard  | 2                 | 12            | 18718         | 8.33  | 9.09  | 0    | 0    | 8.33  | 9.09  | 27.27 | 9.09  | 9.09  | 27.27 | 0     | 9.09  | 63.64 | 0    | 9.09  | 0     | 0    | 0    | 0     | 0     | 0   | 9.09  | 81.82     | 83.33      |
| Permethrin | Standard  | 2                 | 16.4          | 18718         | 8.33  | 9.09  | 0    | 0    | 16.67 | 10    | 70    | 10    | 20    | 30    | 0     | 30    | 40    | 0    | 20    | 10    | 0    | 0    | 0     | 0     | 0   | 10    | 81.82     | 83.33      |
| Permethrin | Standard  | 2                 | 35            | 18718         | 16.67 | 10    | 0    | 0    | 25    | 55.56 | 100   | 22.22 | 55.56 | 55.56 | 0     | 44.44 | 88.89 | 0    | 66.67 | 11.11 | 0    | 0    | 11.11 | 0     | 0   | 11.11 | 90        | 100        |
| Permethrin | Standard  | 3                 | 0             | 18724         | 16.67 | 10    | 0    | 0    | 25    | 0     | 0     | 0     | 0     | 0     | 0     | 0     | 0     | 0    | 0     | 0     | 0    | 0    | 0     | 0     | 0   | 0     | 10        | 25         |
| Permethrin | Standard  | 3                 | 1             | 18724         | 0     | 0     | 0    | 0    | 0     | 8.33  | 8.33  | 8.33  | 8.33  | 8.33  | 0     | 8.33  | 0     | 0    | 8.33  | 0     | 0    | 0    | 8.33  | 0     | 0   | 0     | 16.67     | 16.67      |
| Permethrin | Standard  | 3                 | 2.54          | 18724         | 33.33 | 0     | 0    | 0    | 33.33 | 0     | 0     | 0     | 0     | 0     | 0     | 0     | 0     | 0    | 0     | 0     | 0    | 0    | 12.5  | 0     | 0   | 0     | 12.5      | 41.67      |
| Permethrin | Standard  | 3                 | 5             | 18724         | 0     | 0     | 0    | 0    | 0     | 8.33  | 0     | 0     | 0     | 0     | 0     | 8.33  | 0     | 0    | 0     | 0     | 0    | 0    | 0     | 0     | 0   | 0     | 8.33      | 8.33       |
| Permethrin | Standard  | 3                 | 8             | 18724         | 16.67 | 0     | 0    | 0    | 16.67 | 0     | 40    | 0     | 0     | 0     | 0     | 0     | 0     | 0    | 0     | 0     | 0    | 0    | 0     | 0     | 0   | 0     | 40        | 50         |
| Permethrin | Standard  | 3                 | 12            | 18724         | 0     | 0     | 0    | 0    | 16.67 | 20    | 90    | 10    | 10    | 10    | 0     | 40    | 60    | 0    | 30    | 0     | 0    | 0    | 0     | 0     | 0   | 0     | 75        | 91.67      |
| Permethrin | Standard  | 3                 | 16.4          | 18724         | 16.67 | 20    | 0    | 0    | 33.33 | 12.5  | 50    | 25    | 12.5  | 37.5  | 0     | 12.5  | 50    | 0    | 25    | 12.5  | 0    | 0    | 12.5  | 0     | 0   | 25    | 60        | 75         |
| Permethrin | Standard  | 3                 | 35            | 18724         | 16.67 | 10    | 0    | 0    | 33.33 | 12.5  | 87.5  | 25    | 50    | 62.5  | 0     | 12.5  | 75    | 0    | 25    | 0     | 0    | 0    | 0     | 0     | 0   | 12.5  | 90        | 100        |
| Pyrene     | Chorion   | 1                 | 0             | 18792         | 0     | 0     | 0    | 0    | 0     | 8.33  | 0     | 8.33  | 8.33  | 8.33  | 0     | 8.33  | 8.33  | 0    | 8.33  | 8.33  | 0    | 0    | 8.33  | 8.33  | 0   | 8.33  | 8.33      | 8.33       |
| Pyrene     | Chorion   | 1                 | 1             | 18792         | 0     | 0     | 0    | 0    | 0     | 0     | 0     | 0     | 0     | 0     | 0     | 0     | 0     | 0    | 0     | 0     | 0    | 0    | 0     | 0     | 0   | 0     | 0         | 0          |
| Pyrene     | Chorion   | 1                 | 5             | 18792         | 0     | 0     | 0    | 0    | 0     | 0     | 0     | 0     | 0     | 0     | 0     | 0     | 0     | 0    | 0     | 0     | 0    | 0    | 0     | 0     | 0   | 0     | 0         | 0          |
| Pyrene     | Chorion   | 1                 | 16.5          | 18792         | 0     | 0     | 0    | 0    | 0     | 0     | 0     | 0     | 0     | 0     | 0     | 0     | 0     | 0    | 0     | 0     | 0    | 0    | 0     | 0     | 0   | 0     | 0         | 0          |
| Pyrene     | Chorion   | 1                 | 30            | 18792         | 0     | 0     | 0    | 0    | 0     | 0     | 0     | 0     | 0     | 0     | 0     | 0     | 0     | 0    | 0     | 0     | 0    | 0    | 0     | 0     | 0   | 0     | 0         | 0          |
| Pyrene     | Chorion   | 1                 | 50            | 18792         | 0     | 0     | 0    | 0    | 0     | 0     | 0     | 0     | 0     | 0     | 0     | 0     | 0     | 0    | 0     | 0     | 0    | 0    | 0     | 0     | 0   | 0     | 0         | 0          |
| Pyrene     | Chorion   | 1                 | 65            | 18792         | 0     | 0     | 0    | 0    | 41.67 | 0     | 0     | 0     | 0     | 42.86 | 0     | 14.29 | 0     | 0    | 0     | 0     | 0    | 0    | 0     | 0     | 0   | 0     | 25        | 66.67      |
| Pyrene     | Chorion   | 1                 | 100           | 18792         | 0     | 0     | 0    | 0    | 58.33 | 20    | 0     | 0     | 0     | 60    | 0     | 40    | 0     | 0    | 0     | 0     | 0    | 0    | 0     | 0     | 0   | 0     | 33.33     | 91.67      |
| Pyrene     | Chorion   | 2                 | 0             | 18793         | 0     | 0     | 0    | 0    | 0     | 0     | 0     | 0     | 0     | 0     | 0     | 0     | 0     | 0    | 0     | 0     | 0    | 0    | 0     | 0     | 0   | 0     | 0         | 0          |
| Pyrene     | Chorion   | 2                 | 1             | 18793         | 8.33  | 0     | 0    | 0    | 8.33  | 0     | 0     | 0     | 0     | 0     | 0     | 0     | 0     | 0    | 0     | 0     | 0    | 0    | 0     | 0     | 0   | 0     | 0         | 8.33       |
| Pyrene     | Chorion   | 2                 | 5             | 18793         | 0     | 0     | 0    | 0    | 0     | 8.33  | 8.33  | 8.33  | 8.33  | 8.33  | 0     | 8.33  | 8.33  | 0    | 8.33  | 8.33  | 0    | 0    | 8.33  | 8.33  | 0   | 8.33  | 8.33      | 8.33       |
| Pyrene     | Chorion   | 2                 | 16.5          | 18793         | 0     | 0     | 0    | 0    | 16.67 | 16.67 | 16.67 | 16.67 | 16.67 | 16.67 | 0     | 16.67 | 8.33  | 8.33 | 16.67 | 16.67 | 0    | 0    | 16.67 | 16.67 | 0   | 16.67 | 16.67     | 16.67      |
| Pyrene     | Chorion   | 2                 | 30            | 18793         | 0     | 0     | 0    | 0    | 0     | 0     | 0     | 0     | 0     | 0     | 0     | 0     | 0     | 0    | 0     | 0     | 0    | 0    | 0     | 0     | 0   | 0     | 0         | 0          |
| Pyrene     | Chorion   | 2                 | 50            | 18793         | 0     | 0     | 0    | 0    | 33.33 | 0     | 0     | 0     | 0     | 0     | 0     | 0     | 0     | 0    | 0     | 0     | 0    | 0    | 0     | 0     | 0   | 0     | 33.33     | 0          |
| Pyrene     | Chorion   | 2                 | 65            | 18793         | 0     | 0     | 0    | 0    | 25    | 0     | 11.11 | 0     | 11.11 | 22.22 | 0     | 33.33 | 0     | 0    | 0     | 0     | 0    | 0    | 0     | 0     | 0   | 0     | 25        | 50         |
| Pyrene     | Chorion   | 2                 | 100           | 18793         | 0     | 0     | 0    | 0    | 50    | 33.33 | 0     | 33.33 | 50    | 83.33 | 0     | 83.33 | 0     | 0    | 33.33 | 0     | 0    | 0    | 33.33 | 0     | 0   | 41.67 | 91.67     |            |
| Pyrene     | Chorion   | 3                 | 0             | 18794         | 0     | 0     | 0    | 0    | 0     | 0     | 0     | 0     | 0     | 0     | 0     | 0     | 0     | 0    | 0     | 0     | 0    | 0    | 0     | 0     | 0   | 0     | 0         | 0          |
| Pyrene     | Chorion   | 3                 | 1             | 18794         | 0     | 0     | 0    | 0    | 8.33  | 0     | 0     | 0     | 0     | 0     | 0     | 0     | 0     | 0    | 0     | 0     | 0    | 0    | 0     | 0     | 0   | 0     | 0         | 8.33       |
| Pyrene     | Chorion   | 3                 | 5             | 18794         | 0     | 0     | 0    | 0    | 0     | 0     | 0     | 0     | 0     | 8.33  | 0     | 8.33  | 0     | 0    | 0     | 0     | 0    | 0    | 0     | 0     | 0   | 0     | 8.33      | 8.33       |
| Pyrene     | Chorion   | 3                 | 16.5          | 18794         | 0     | 0     | 0    | 0    | 8.33  | 0     | 0     | 0     | 0     | 0     | 0     | 0     | 0     | 0    | 0     | 0     | 0    | 0    | 0     | 0     | 0   | 0     | 0         | 8.33       |
| Pyrene     | Chorion   | 3                 | 30            | 18794         | 0     | 0     | 0    | 0    | 0     | 0     | 0     | 0     | 0     | 0     | 0     | 0     | 0     | 0    | 0     | 0     | 0    | 0    | 0     | 0     | 0   | 0     | 0         | 0          |
| Pyrene     | Chorion   | 3                 | 50            | 18794         | 0     | 0     | 0    | 0    | 8.33  | 0     | 0     | 0     | 0     | 0     | 0     | 0     | 0     | 0    | 0     | 0     | 0    | 0    | 0     | 0     | 0   | 0     | 0         | 8.33       |
| Pyrene     | Chorion   | 3                 | 65            | 18794         | 8.33  | 0     | 0    | 0    | 33.33 | 50    | 0     | 12.5  | 37.5  | 50    | 0     | 37.5  | 0     | 0    | 25    | 0     | 0    | 0    | 12.5  | 0     | 0   | 0     | 45.45     | 75         |
| Pyrene     | Chorion   | 3                 | 100           | 18794         | 0     | 0     | 0    | 0    | 25    | 11.11 | 0     | 11.11 | 77.78 | 0     | 55.56 | 11.11 | 0     | 0    | 0     | 0     | 0    | 0    | 0     | 0     | 0   | 0     | 58.33     | 83.33      |
| Pyrene     | DR        | 1                 | 0             | 18795         | 0     | 0     | 0    | 0    | 0     | 0     | 0     | 0     | 0     | 0     | 0     | 0     | 0     | 0    | 0     | 0     | 0    | 0    | 0     | 0     | 0   | 0     | 0         | 0          |
| Pyrene     | DR        | 1                 | 1             | 18795         | 0     | 0     | 0    | 0    | 0     | 8.33  | 0     | 8.33  | 8.33  | 8.33  | 0     | 8.33  | 0     | 0    | 0     | 0     | 0    | 0    | 0     | 0     | 0   | 0     | 8.33      | 8.33       |
| Pyrene     | DR        | 1                 | 5             | 18795         | 0     | 0     | 0    | 0    | 0     | 0     | 0     | 0     | 0     | 0     | 0     | 0     | 0     | 0    | 0     | 0     | 0    | 0    | 0     | 0     | 0   | 0     | 0         | 0          |
| Pyrene     | DR        | 1                 | 16.5          | 18795         | 0     | 8.33  | 0    | 0    | 41.67 | 42.86 | 28.57 | 42.86 | 71.43 | 71.43 | 0     | 42.86 | 28.57 | 0    | 57.14 | 0     | 0    | 0    | 14.29 | 0     | 0   | 28.57 | 58.33     | 91.67      |
| Pyrene     | DR        | 1                 | 30            | 18795         | 0     | 8.33  | 0    | 0    | 50    | 66.67 | 16.67 | 50    | 100   | 100   | 0     | 50    | 33.33 | 0    | 83.33 | 0     | 0    | 0    | 0     | 0     | 0   | 66.67 | 58.33     | 100        |
| Pyrene     | DR        | 1                 | 50            | 18795         | 0     | 8.33  | 0    | 0    | 25    | 66.67 | 22.22 | 77.78 | 88.89 | 88.89 | 0     | 66.67 | 33.33 | 0    | 88.89 | 11.11 | 0    | 0    | 11.11 | 0     | 0   | 66.67 | 66.67     | 91.67      |
| Pyrene     | DR        | 1                 | 65            | 18795         | 0     | 25    | 0    | 0    | 25    | 66.67 | 33.33 | 55.56 | 77.78 | 77.78 | 0     | 66.67 | 22.22 | 0    | 66.67 | 0     | 0    | 0    | 22.22 | 0     | 0   | 33.33 | 75        | 91.67      |
| Pyrene     | DR        | 1                 | 100           | 18795         | 16.67 | 10    | 0    | 0    | 58.33 | 40    | 80    | 40    | 80    | 80    | 0     | 40    | 20    | 0    | 40    | 0     | 0    | 0    | 0     | 0     | 0   | 40    | 50        | 100        |
| Pyrene     | DR        | 2                 | 0             | 18796         | 41.67 | 14.29 | 0    | 0    | 41.67 | 0     | 0     | 0     | 0     | 0     | 0     | 0     | 0     | 0    | 14.29 | 0     | 0    | 0    | 0     | 0     | 0   | 0     | 14.29     | 50         |
| Pyrene     | DR        | 2                 | 1             | 18796         | 0     | 0     | 0    | 0    | 0     | 8.33  | 8.33  | 8.33  | 8.33  | 8.33  | 0     | 8.33  | 0     | 0    | 8.33  | 0     | 0    | 0    | 0     | 0     | 0   | 0     | 8.33      | 8.33       |
| Pyrene     | DR        | 2                 | 5             | 18796         | 0     | 0     | 0    | 0    | 0     | 9.    |       |       |       |       |       |       |       |      |       |       |      |      |       |       |     |       |           |            |

| Test Agent | Treatment | Replicate plate # | Concentration | Plate Barcode | MO24  | DP24  | SM24 | NC24 | MORT  | YSE_<br>53 | AXIS  | EYE_<br>53 | SNOU  | JAW_<br>53 | OTIC | PE_<br>53 | BRAI  | SOMI  | PFIN  | CFIN  | PIG_<br>53 | CIRC  | TRUN  | SWIM  | NC_<br>53 | TR_<br>53 | .except.M | any.effect |
|------------|-----------|-------------------|---------------|---------------|-------|-------|------|------|-------|------------|-------|------------|-------|------------|------|-----------|-------|-------|-------|-------|------------|-------|-------|-------|-----------|-----------|-----------|------------|
| Pyrene     | LD        | 1                 | 65            | 18819         | 0     | 0     | 0    | 0    | 8.33  | 18.18      | 9.09  | 27.27      | 27.27 | 54.55      | 0    | 54.55     | 0     | 0     | 9.09  | 9.09  | 0          | 0     | 18.18 | 9.09  | 0         | 9.09      | 58.33     | 66.67      |
| Pyrene     | LD        | 1                 | 100           | 18819         | 0     | 0     | 0    | 0    | 41.67 | 57.14      | 28.57 | 42.86      | 57.14 | 100        | 0    | 85.71     | 28.57 | 14.29 | 57.14 | 42.86 | 0          | 0     | 57.14 | 28.57 | 0         | 28.57     | 58.33     | 100        |
| Pyrene     | LD        | 2                 | 0             | 18820         | 8.33  | 0     | 0    | 0    | 8.33  | 0          | 0     | 0          | 0     | 0          | 0    | 0         | 0     | 0     | 0     | 0     | 0          | 0     | 0     | 0     | 0         | 0         | 0         | 8.33       |
| Pyrene     | LD        | 2                 | 1             | 18820         | 0     | 0     | 0    | 0    | 0     | 0          | 0     | 0          | 0     | 0          | 0    | 0         | 0     | 0     | 0     | 0     | 0          | 0     | 0     | 0     | 0         | 0         | 0         | 0          |
| Pyrene     | LD        | 2                 | 5             | 18820         | 0     | 0     | 0    | 0    | 0     | 0          | 0     | 0          | 0     | 0          | 0    | 0         | 0     | 0     | 0     | 0     | 0          | 0     | 0     | 0     | 0         | 0         | 0         | 0          |
| Pyrene     | LD        | 2                 | 16.5          | 18820         | 0     | 0     | 0    | 0    | 0     | 0          | 0     | 0          | 0     | 0          | 0    | 0         | 0     | 0     | 0     | 0     | 0          | 0     | 0     | 0     | 0         | 0         | 0         | 0          |
| Pyrene     | LD        | 2                 | 30            | 18820         | 0     | 0     | 0    | 0    | 0     | 8.33       | 8.33  | 8.33       | 8.33  | 8.33       | 0    | 8.33      | 8.33  | 0     | 8.33  | 8.33  | 0          | 0     | 8.33  | 8.33  | 0         | 8.33      | 8.33      | 8.33       |
| Pyrene     | LD        | 2                 | 50            | 18820         | 0     | 0     | 0    | 0    | 16.67 | 0          | 0     | 10         | 10    | 10         | 0    | 10        | 0     | 0     | 0     | 0     | 0          | 0     | 0     | 0     | 0         | 0         | 8.33      | 25         |
| Pyrene     | LD        | 2                 | 65            | 18820         | 8.33  | 9.09  | 0    | 0    | 33.33 | 37.5       | 25    | 50         | 75    | 75         | 12.5 | 75        | 12.5  | 0     | 50    | 37.5  | 0          | 0     | 37.5  | 25    | 0         | 37.5      | 54.55     | 83.33      |
| Pyrene     | LD        | 2                 | 100           | 18820         | 0     | 0     | 0    | 0    | 33.33 | 50         | 25    | 37.5       | 62.5  | 100        | 0    | 100       | 0     | 0     | 37.5  | 12.5  | 0          | 0     | 37.5  | 12.5  | 0         | 37.5      | 66.67     | 100        |
| Pyrene     | LD        | 3                 | 0             | 19202         | 8.33  | 0     | 0    | 0    | 16.67 | 0          | 0     | 0          | 0     | 0          | 0    | 0         | 0     | 0     | 0     | 0     | 0          | 0     | 0     | 0     | 0         | 0         | 0         | 16.67      |
| Pyrene     | LD        | 3                 | 1             | 19202         | 16.67 | 0     | 0    | 0    | 16.67 | 10         | 0     | 0          | 10    | 10         | 0    | 10        | 0     | 0     | 10    | 0     | 0          | 0     | 0     | 0     | 0         | 0         | 10        | 25         |
| Pyrene     | LD        | 3                 | 5             | 19202         | 0     | 0     | 0    | 0    | 0     | 0          | 0     | 0          | 0     | 0          | 0    | 0         | 0     | 0     | 0     | 0     | 0          | 0     | 0     | 0     | 0         | 0         | 0         | 0          |
| Pyrene     | LD        | 3                 | 16.5          | 19202         | 8.33  | 0     | 0    | 0    | 25    | 0          | 0     | 0          | 0     | 0          | 0    | 0         | 0     | 0     | 0     | 0     | 0          | 0     | 0     | 0     | 0         | 0         | 0         | 25         |
| Pyrene     | LD        | 3                 | 30            | 19202         | 8.33  | 0     | 0    | 0    | 25    | 0          | 0     | 0          | 0     | 0          | 0    | 0         | 0     | 0     | 0     | 0     | 0          | 0     | 0     | 0     | 0         | 0         | 0         | 25         |
| Pyrene     | LD        | 3                 | 50            | 19202         | 0     | 16.67 | 0    | 0    | 25    | 22.22      | 0     | 22.22      | 11.11 | 11.11      | 0    | 11.11     | 0     | 0     | 11.11 | 11.11 | 0          | 0     | 11.11 | 0     | 0         | 11.11     | 33.33     | 50         |
| Pyrene     | LD        | 3                 | 65            | 19202         | 8.33  | 18.18 | 0    | 0    | 33.33 | 25         | 0     | 25         | 37.5  | 37.5       | 0    | 37.5      | 0     | 0     | 12.5  | 0     | 0          | 0     | 25    | 0     | 0         | 0         | 54.55     | 75         |
| Pyrene     | LD        | 3                 | 100           | 19202         | 0     | 25    | 0    | 0    | 41.67 | 57.14      | 14.29 | 57.14      | 85.71 | 85.71      | 0    | 71.43     | 0     | 0     | 57.14 | 14.29 | 0          | 0     | 71.43 | 0     | 0         | 28.57     | 66.67     | 100        |
| Pyrene     | Standard  | 1                 | 0             | 18808         | 0     | 0     | 0    | 0    | 8.33  | 0          | 0     | 0          | 0     | 0          | 0    | 0         | 0     | 0     | 0     | 0     | 0          | 0     | 0     | 0     | 0         | 0         | 0         | 8.33       |
| Pyrene     | Standard  | 1                 | 1             | 18808         | 0     | 0     | 0    | 0    | 0     | 0          | 0     | 0          | 0     | 0          | 0    | 0         | 0     | 0     | 0     | 0     | 0          | 0     | 0     | 0     | 0         | 0         | 0         | 0          |
| Pyrene     | Standard  | 1                 | 5             | 18808         | 0     | 0     | 0    | 0    | 0     | 0          | 0     | 0          | 0     | 0          | 0    | 0         | 0     | 0     | 0     | 0     | 0          | 0     | 0     | 0     | 0         | 0         | 0         | 0          |
| Pyrene     | Standard  | 1                 | 16.5          | 18808         | 0     | 0     | 0    | 0    | 0     | 8.33       | 0     | 0          | 8.33  | 8.33       | 0    | 8.33      | 0     | 0     | 8.33  | 8.33  | 0          | 0     | 0     | 0     | 0         | 0         | 16.67     | 16.67      |
| Pyrene     | Standard  | 1                 | 30            | 18808         | 0     | 0     | 0    | 0    | 8.33  | 0          | 9.09  | 0          | 0     | 0          | 0    | 0         | 0     | 0     | 0     | 0     | 0          | 0     | 0     | 0     | 0         | 0         | 8.33      | 16.67      |
| Pyrene     | Standard  | 1                 | 50            | 18808         | 0     | 0     | 0    | 0    | 16.67 | 0          | 20    | 0          | 30    | 30         | 0    | 0         | 0     | 0     | 10    | 0     | 0          | 0     | 0     | 0     | 0         | 0         | 41.67     | 58.33      |
| Pyrene     | Standard  | 1                 | 65            | 18808         | 0     | 0     | 0    | 0    | 50    | 16.67      | 33.33 | 16.67      | 83.33 | 83.33      | 0    | 16.67     | 0     | 0     | 16.67 | 0     | 0          | 0     | 0     | 0     | 0         | 0         | 41.67     | 91.67      |
| Pyrene     | Standard  | 1                 | 100           | 18808         | 8.33  | 9.09  | 0    | 0    | 75    | 33.33      | 0     | 33.33      | 100   | 100        | 0    | 33.33     | 33.33 | 0     | 33.33 | 0     | 0          | 0     | 0     | 0     | 0         | 0         | 36.36     | 100        |
| Pyrene     | Standard  | 2                 | 0             | 18814         | 0     | 0     | 0    | 0    | 0     | 0          | 0     | 0          | 0     | 0          | 0    | 0         | 0     | 0     | 0     | 0     | 0          | 0     | 0     | 0     | 0         | 0         | 0         | 0          |
| Pyrene     | Standard  | 2                 | 1             | 18814         | 0     | 0     | 0    | 0    | 0     | 8.33       | 8.33  | 8.33       | 8.33  | 8.33       | 0    | 8.33      | 0     | 0     | 8.33  | 0     | 0          | 0     | 0     | 0     | 0         | 0         | 8.33      | 8.33       |
| Pyrene     | Standard  | 2                 | 5             | 18814         | 8.33  | 0     | 0    | 0    | 8.33  | 0          | 0     | 0          | 0     | 0          | 0    | 0         | 0     | 0     | 0     | 0     | 0          | 0     | 0     | 0     | 0         | 0         | 0         | 8.33       |
| Pyrene     | Standard  | 2                 | 16.5          | 18814         | 0     | 8.33  | 0    | 0    | 16.67 | 0          | 0     | 0          | 0     | 0          | 0    | 0         | 0     | 0     | 0     | 0     | 0          | 0     | 0     | 0     | 0         | 0         | 8.33      | 16.67      |
| Pyrene     | Standard  | 2                 | 30            | 18814         | 0     | 8.33  | 0    | 0    | 8.33  | 0          | 0     | 0          | 9.09  | 9.09       | 0    | 0         | 9.09  | 0     | 0     | 0     | 0          | 0     | 0     | 0     | 0         | 9.09      | 16.67     | 16.67      |
| Pyrene     | Standard  | 2                 | 50            | 18814         | 16.67 | 10    | 0    | 0    | 33.33 | 0          | 0     | 0          | 25    | 25         | 0    | 0         | 0     | 0     | 0     | 0     | 0          | 0     | 0     | 0     | 0         | 0         | 20        | 50         |
| Pyrene     | Standard  | 2                 | 65            | 18814         | 0     | 0     | 0    | 0    | 50    | 33.33      | 33.33 | 33.33      | 50    | 50         | 0    | 33.33     | 0     | 0     | 33.33 | 0     | 0          | 0     | 16.67 | 0     | 0         | 0         | 25        | 75         |
| Pyrene     | Standard  | 2                 | 100           | 18814         | 8.33  | 9.09  | 0    | 0    | 25    | 33.33      | 33.33 | 44.44      | 88.89 | 88.89      | 0    | 33.33     | 0     | 0     | 55.56 | 11.11 | 0          | 0     | 0     | 0     | 0         | 22.22     | 72.73     | 91.67      |
| Pyrene     | Standard  | 3                 | 0             | 18816         | 8.33  | 0     | 0    | 0    | 8.33  | 0          | 0     | 0          | 0     | 0          | 0    | 0         | 0     | 0     | 0     | 0     | 0          | 0     | 0     | 0     | 0         | 0         | 0         | 8.33       |
| Pyrene     | Standard  | 3                 | 1             | 18816         | 0     | 0     | 0    | 0    | 0     | 0          | 0     | 0          | 0     | 0          | 0    | 0         | 0     | 0     | 0     | 0     | 0          | 0     | 0     | 0     | 0         | 0         | 0         | 0          |
| Pyrene     | Standard  | 3                 | 5             | 18816         | 0     | 0     | 0    | 0    | 0     | 0          | 0     | 0          | 0     | 0          | 0    | 0         | 0     | 0     | 0     | 0     | 0          | 0     | 0     | 0     | 0         | 0         | 0         | 0          |
| Pyrene     | Standard  | 3                 | 16.5          | 18816         | 0     | 8.33  | 0    | 0    | 8.33  | 0          | 9.09  | 0          | 0     | 0          | 0    | 0         | 0     | 0     | 0     | 9.09  | 0          | 0     | 0     | 0     | 0         | 0         | 25        | 25         |
| Pyrene     | Standard  | 3                 | 30            | 18816         | 8.33  | 0     | 0    | 0    | 8.33  | 0          | 0     | 0          | 0     | 0          | 0    | 0         | 0     | 0     | 0     | 0     | 0          | 0     | 0     | 0     | 0         | 0         | 0         | 8.33       |
| Pyrene     | Standard  | 3                 | 50            | 18816         | 0     | 0     | 0    | 0    | 0     | 8.33       | 0     | 16.67      | 33.33 | 33.33      | 0    | 8.33      | 0     | 8.33  | 16.67 | 0     | 0          | 0     | 0     | 0     | 8.33      | 0         | 50        | 50         |
| Pyrene     | Standard  | 3                 | 65            | 18816         | 8.33  | 0     | 0    | 0    | 16.67 | 10         | 20    | 10         | 60    | 60         | 0    | 10        | 0     | 0     | 20    | 0     | 0          | 0     | 10    | 0     | 0         | 0         | 54.55     | 66.67      |
| Pyrene     | Standard  | 3                 | 100           | 18816         | 0     | 0     | 0    | 0    | 50    | 0          | 33.33 | 16.67      | 16.67 | 16.67      | 0    | 16.67     | 0     | 16.67 | 0     | 0     | 0          | 0     | 33.33 | 0     | 0         | 33.33     | 41.67     | 91.67      |
| Retene     | Chorion   | 1                 | 0             | 18844         | 0     | 0     | 0    | 0    | 0     | 0          | 0     | 0          | 0     | 0          | 0    | 0         | 0     | 0     | 0     | 0     | 0          | 0     | 0     | 0     | 0         | 0         | 0         | 0          |
| Retene     | Chorion   | 1                 | 1             | 18844         | 0     | 0     | 0    | 0    | 0     | 0          | 0     | 0          | 0     | 0          | 0    | 0         | 0     | 0     | 0     | 0     | 0          | 0     | 0     | 0     | 0         | 0         | 0         | 0          |
| Retene     | Chorion   | 1                 | 5             | 18844         | 0     | 0     | 0    | 0    | 0     | 0          | 0     | 0          | 0     | 0          | 0    | 0         | 0     | 0     | 0     | 0     | 0          | 0     | 0     | 0     | 0         | 0         | 0         | 0          |
| Retene     | Chorion   | 1                 | 20            | 18844         | 0     | 0     | 0    | 0    | 0     | 0          | 0     | 0          | 0     | 0          | 0    | 0         | 0     | 0     | 0     | 0     | 0          | 0     | 0     | 0     | 0         | 0         | 0         | 0          |
| Retene     | Chorion   | 1                 | 30            | 18844         | 0     | 0     | 0    | 0    | 0     | 16.67      | 8.33  | 8.33       | 25    | 25         | 0    | 8.33      | 0     | 0     | 16.67 | 0     | 0          | 0     | 0     | 0     | 0         | 8.33      | 25        | 25         |
| Retene     | Chorion   | 1                 | 45            | 18844         | 0     | 0     | 0    | 0    | 0     | 41.67      | 8.33  | 50         | 66.67 | 75         | 0    | 50        | 0     | 0     | 58.33 | 0     | 0          | 0     | 0     | 0     | 0         | 8.33      | 83.33     | 83.33      |
| Retene     | Chorion   | 1                 | 65            | 18844         | 0     | 0     | 0    | 0    | 8.33  | 72.73      | 0     | 63.64      | 81.82 | 81.82      | 0    | 54.55     | 0     | 0     | 81.82 | 0     | 0          | 0     | 0     | 0     | 0         | 9.09      | 75        | 83.33      |
| Retene     | Chorion   | 1                 | 100           | 18844         | 0     | 0     | 0    | 0    | 0     | 100        | 16.67 | 100        | 100   | 100        | 0    | 91.67     | 0     | 0     | 100   | 0     | 0          | 0     | 0     | 0     | 0         | 100       | 100       | 100        |
| Retene     | Chorion   | 2                 | 0             | 18851         | 8.33  | 0     | 0    | 0    | 25    | 0          | 0     | 0          | 0     | 0          | 0    | 0         | 0     | 0     | 0     | 0     | 0          | 0     | 0     | 0     | 0         | 0         | 0         | 25         |
| Retene     | Chorion   | 2                 | 1             | 18851         | 0     | 0     | 0    | 0    | 8.33  | 0          | 0     | 0          | 0     | 0          | 0    | 0         | 0     | 0     | 0     | 0     | 0          | 0     | 0     | 0     | 0         | 0         | 0         | 8.33       |
| Retene     | Chorion   | 2                 | 5             | 18851         | 0     | 0     | 0    | 0    | 8.33  | 0          | 0     | 0          | 0     | 0          | 0    | 0         | 0     | 0     | 0     | 0     | 0          | 0     | 0     | 0     | 0         | 0         | 0         | 8.33       |
| Retene     | Chorion   | 2                 | 20            | 18851         | 0     | 0     | 0    | 0    | 0     | 16.67      | 8.33  | 16.67      | 16.67 | 16.67      | 0    | 16.67     | 0     | 0     | 16.67 | 0     | 0          | 0     | 0     | 0     | 0         | 8.33      | 16.67     | 16.67      |
| Retene     | Chorion   | 2                 | 30            | 18851         | 0     | 0     | 0    | 0    | 8.33  | 9.09       | 0     | 9.09       | 9.09  | 9.09       | 0    | 9.09      | 0     | 0     | 9.09  | 0     | 0          | 0     | 0     | 0     | 0         | 0         | 8.33      | 16.67      |
| Retene     | Chorion   | 2                 | 45            | 18851         | 0     | 0     | 0    | 0    | 0     | 66.67      | 8.33  | 58.33      | 66.67 | 66.67      | 0    | 66.67     | 0     | 0     | 75    | 0     | 0          | 25    | 0     | 0     | 0         | 0         | 75        | 75         |
| Retene     | Chorion   | 2                 | 65            | 18851         | 0     | 0     | 0    | 0    | 0     | 66.67      | 8.33  | 58.33      | 83.33 | 83.33      | 0    | 75        | 0     | 0     | 75    | 0     | 0          | 41.67 | 0     | 0     | 0         | 8.33      | 83.33     | 83.33      |
| Retene     | Chorion   | 2                 | 100           | 18851         | 0     | 0     | 0    | 0    | 0     | 100        | 18.18 | 100        | 100   | 100        | 0    | 100       | 0     | 0     | 100   | 0     | 0          | 54.55 | 0     | 0     | 0         | 0         | 100       | 100        |
| Retene     | Chorion   | 3                 | 0             | 18883         | 0     | 0     | 0    | 0    | 8.33  | 0          | 8.33  | 8.33       | 8.33  | 0          | 0    | 0         | 0     | 8.33  | 0     | 0     | 8.33       | 8.33  | 0     | 0     |           |           |           |            |

| Test Agent | Treatment | Replicate plate # | Concentration | Plate Barcode | MO24  | DP24  | SM24 | NC24 | MORT  | YSE_  | AXIS  | EYE_  | SNOU  | JAW_  | OTIC  | PE_   | BRAI  | SOMI  | PFIN  | CFIN  | PIG_ | CIRC  | TRUN  | SWIM  | NC_  | TR_   | ...except.M | Many.effect |    |
|------------|-----------|-------------------|---------------|---------------|-------|-------|------|------|-------|-------|-------|-------|-------|-------|-------|-------|-------|-------|-------|-------|------|-------|-------|-------|------|-------|-------------|-------------|----|
| Retene     | DR        | 2                 | 30            | 18848         | 33.33 | 0     | 0    | 0    | 58.33 | 100   | 80    | 100   | 100   | 100   | 20    | 100   | 60    | 20    | 100   | 100   | 0    | 0     | 100   | 100   | 0    | 20    | 62.5        | 100         |    |
| Retene     | DR        | 2                 | 45            | 18848         | 33.33 | 0     | 0    | 0    | 50    | 100   | 66.67 | 100   | 100   | 100   | 0     | 100   | 66.67 | 0     | 100   | 100   | 0    | 0     | 100   | 100   | 0    | 16.67 | 75          | 100         |    |
| Retene     | DR        | 2                 | 65            | 18848         | 50    | 0     | 0    | 0    | 83.33 | 100   | 100   | 100   | 100   | 100   | 50    | 100   | 100   | 0     | 100   | 100   | 0    | 0     | 100   | 100   | 0    | 0     | 33.33       | 100         |    |
| Retene     | DR        | 2                 | 100           | 18848         | 41.67 | 0     | 0    | 0    | 83.33 | 100   | 100   | 100   | 100   | 100   | 100   | 100   | 0     | 50    | 100   | 0     | 0    | 100   | 100   | 0     | 100  | 28.57 | 100         |             |    |
| Retene     | DR        | 3                 | 0             | 19002         | 8.33  | 9.09  | 0    | 0    | 16.67 | 0     | 0     | 0     | 0     | 0     | 0     | 0     | 0     | 0     | 0     | 0     | 0    | 0     | 0     | 0     | 0    | 0     | 9.09        | 16.67       |    |
| Retene     | DR        | 3                 | 1             | 19002         | 33.33 | 0     | 0    | 0    | 33.33 | 0     | 0     | 0     | 0     | 0     | 0     | 0     | 0     | 0     | 0     | 0     | 0    | 0     | 0     | 0     | 0    | 0     | 0           | 33.33       |    |
| Retene     | DR        | 3                 | 5             | 19002         | 16.67 | 0     | 0    | 0    | 16.67 | 10    | 0     | 10    | 10    | 10    | 0     | 10    | 0     | 0     | 10    | 0     | 0    | 0     | 0     | 0     | 0    | 0     | 10          | 25          |    |
| Retene     | DR        | 3                 | 20            | 19002         | 8.33  | 0     | 0    | 0    | 8.33  | 100   | 81.82 | 100   | 100   | 100   | 27.27 | 100   | 90.91 | 0     | 100   | 100   | 0    | 0     | 100   | 90.91 | 0    | 9.09  | 100         | 100         |    |
| Retene     | DR        | 3                 | 30            | 19002         | 16.67 | 20    | 0    | 0    | 25    | 100   | 77.78 | 100   | 100   | 100   | 11.11 | 100   | 100   | 0     | 100   | 100   | 0    | 0     | 100   | 100   | 0    | 11.11 | 100         | 100         |    |
| Retene     | DR        | 3                 | 45            | 19002         | 33.33 | 62.5  | 0    | 0    | 66.67 | 100   | 75    | 100   | 100   | 100   | 50    | 100   | 100   | 25    | 100   | 100   | 0    | 0     | 100   | 75    | 0    | 25    | 100         | 100         |    |
| Retene     | DR        | 3                 | 65            | 19002         | 58.33 | 60    | 0    | 0    | 75    | 100   | 100   | 100   | 100   | 100   | 66.67 | 100   | 100   | 33.33 | 100   | 100   | 0    | 0     | 100   | 100   | 0    | 66.67 | 100         | 100         |    |
| Retene     | DR        | 3                 | 100           | 19002         | 58.33 | 80    | 0    | 0    | 91.67 | 0     | 0     | 0     | 0     | 0     | 0     | 0     | 0     | 0     | 0     | 0     | 0    | 0     | 0     | 0     | 0    | 0     | 80          | 100         |    |
| Retene     | LD        | 1                 | 0             | 18841         | 25    | 0     | 0    | 0    | 25    | 0     | 0     | 0     | 0     | 0     | 0     | 0     | 0     | 0     | 0     | 0     | 0    | 0     | 0     | 0     | 0    | 0     | 0           | 25          |    |
| Retene     | LD        | 1                 | 1             | 18841         | 25    | 0     | 0    | 0    | 25    | 0     | 0     | 0     | 0     | 0     | 0     | 0     | 0     | 0     | 0     | 0     | 0    | 0     | 0     | 0     | 0    | 0     | 11.11       | 33.33       |    |
| Retene     | LD        | 1                 | 5             | 18841         | 25    | 0     | 0    | 0    | 25    | 0     | 0     | 0     | 0     | 0     | 0     | 0     | 0     | 0     | 0     | 0     | 0    | 0     | 0     | 0     | 0    | 0     | 11.11       | 33.33       |    |
| Retene     | LD        | 1                 | 20            | 18841         | 25    | 0     | 0    | 0    | 25    | 22.22 | 11.11 | 22.22 | 22.22 | 22.22 | 0     | 22.22 | 0     | 0     | 22.22 | 11.11 | 0    | 0     | 0     | 0     | 0    | 0     | 22.22       | 41.67       |    |
| Retene     | LD        | 1                 | 30            | 18841         | 25    | 0     | 0    | 0    | 33.33 | 75    | 37.5  | 62.5  | 75    | 75    | 12.5  | 62.5  | 0     | 12.5  | 75    | 12.5  | 0    | 12.5  | 12.5  | 0     | 12.5 | 12.5  | 66.67       | 83.33       |    |
| Retene     | LD        | 1                 | 45            | 18841         | 8.33  | 0     | 0    | 0    | 50    | 83.33 | 33.33 | 83.33 | 83.33 | 83.33 | 0     | 83.33 | 0     | 0     | 83.33 | 0     | 0    | 50    | 0     | 0     | 0    | 0     | 45.45       | 91.67       |    |
| Retene     | LD        | 1                 | 65            | 18841         | 41.67 | 0     | 0    | 0    | 100   | NA    | NA    | NA    | NA    | NA    | NA    | NA    | NA    | NA    | NA    | NA    | NA   | NA    | NA    | NA    | NA   | NA    | 0           | 100         |    |
| Retene     | LD        | 1                 | 100           | 18841         | 50    | 0     | 0    | 0    | 91.67 | 100   | 100   | 100   | 100   | 100   | 0     | 100   | 100   | 0     | 100   | 0     | 0    | 0     | 0     | 0     | 0    | 0     | 16.67       | 100         |    |
| Retene     | LD        | 2                 | 0             | 18842         | 25    | 0     | 0    | 0    | 25    | 0     | 0     | 0     | 0     | 0     | 0     | 0     | 0     | 0     | 0     | 0     | 0    | 0     | 0     | 0     | 0    | 0     | 0           | 25          |    |
| Retene     | LD        | 2                 | 1             | 18842         | 8.33  | 0     | 0    | 0    | 16.67 | 10    | 10    | 10    | 10    | 10    | 0     | 10    | 0     | 0     | 10    | 0     | 0    | 0     | 0     | 0     | 0    | 0     | 0           | 9.09        | 25 |
| Retene     | LD        | 2                 | 5             | 18842         | 33.33 | 0     | 0    | 0    | 33.33 | 0     | 0     | 0     | 0     | 0     | 0     | 0     | 0     | 0     | 0     | 0     | 0    | 0     | 0     | 0     | 0    | 0     | 0           | 33.33       |    |
| Retene     | LD        | 2                 | 20            | 18842         | 0     | 0     | 0    | 0    | 8.33  | 36.36 | 0     | 36.36 | 36.36 | 36.36 | 0     | 36.36 | 0     | 0     | 36.36 | 0     | 0    | 0     | 0     | 0     | 0    | 0     | 33.33       | 41.67       |    |
| Retene     | LD        | 2                 | 30            | 18842         | 16.67 | 0     | 0    | 0    | 25    | 77.78 | 44.44 | 77.78 | 77.78 | 77.78 | 0     | 77.78 | 0     | 0     | 77.78 | 0     | 0    | 44.44 | 0     | 0     | 0    | 0     | 70          | 83.33       |    |
| Retene     | LD        | 2                 | 45            | 18842         | 25    | 0     | 0    | 0    | 58.33 | 80    | 20    | 80    | 80    | 80    | 0     | 80    | 0     | 0     | 80    | 0     | 0    | 0     | 0     | 0     | 0    | 0     | 44.44       | 91.67       |    |
| Retene     | LD        | 2                 | 65            | 18842         | 16.67 | 0     | 0    | 0    | 83.33 | 100   | 0     | 100   | 100   | 100   | 50    | 100   | 0     | 0     | 100   | 50    | 0    | 0     | 0     | 0     | 0    | 50    | 20          | 100         |    |
| Retene     | LD        | 2                 | 100           | 18842         | 66.67 | 0     | 0    | 0    | 91.67 | 100   | 100   | 100   | 100   | 100   | 0     | 100   | 100   | 0     | 100   | 0     | 0    | 0     | 0     | 0     | 0    | 0     | 25          | 100         |    |
| Retene     | LD        | 3                 | 0             | 18849         | 8.33  | 0     | 0    | 0    | 8.33  | 0     | 0     | 0     | 0     | 0     | 0     | 0     | 0     | 0     | 0     | 0     | 0    | 0     | 0     | 0     | 0    | 0     | 0           | 8.33        |    |
| Retene     | LD        | 3                 | 1             | 18849         | 8.33  | 0     | 0    | 0    | 8.33  | 0     | 0     | 0     | 0     | 0     | 0     | 0     | 0     | 0     | 0     | 0     | 0    | 0     | 0     | 0     | 0    | 0     | 0           | 8.33        |    |
| Retene     | LD        | 3                 | 5             | 18849         | 25    | 0     | 0    | 0    | 25    | 11.11 | 11.11 | 11.11 | 11.11 | 11.11 | 0     | 11.11 | 11.11 | 0     | 22.22 | 0     | 0    | 0     | 0     | 11.11 | 0    | 0     | 22.22       | 41.67       |    |
| Retene     | LD        | 3                 | 20            | 18849         | 8.33  | 0     | 0    | 0    | 16.67 | 10    | 10    | 10    | 20    | 20    | 0     | 10    | 0     | 0     | 20    | 0     | 0    | 0     | 10    | 0     | 0    | 0     | 27.27       | 41.67       |    |
| Retene     | LD        | 3                 | 30            | 18849         | 8.33  | 0     | 0    | 0    | 16.67 | 70    | 20    | 80    | 80    | 70    | 0     | 70    | 0     | 0     | 70    | 10    | 0    | 10    | 0     | 0     | 0    | 0     | 72.73       | 83.33       |    |
| Retene     | LD        | 3                 | 45            | 18849         | 8.33  | 0     | 0    | 0    | 33.33 | 87.5  | 0     | 87.5  | 100   | 100   | 0     | 87.5  | 0     | 0     | 87.5  | 12.5  | 0    | 62.5  | 0     | 0     | 0    | 0     | 72.73       | 100         |    |
| Retene     | LD        | 3                 | 65            | 18849         | 33.33 | 0     | 0    | 0    | 75    | 100   | 66.67 | 100   | 100   | 100   | 0     | 100   | 0     | 0     | 100   | 0     | 0    | 33.33 | 0     | 0     | 0    | 0     | 37.5        | 100         |    |
| Retene     | LD        | 3                 | 100           | 18849         | 50    | 0     | 0    | 0    | 91.67 | 100   | 100   | 100   | 100   | 100   | 0     | 100   | 100   | 0     | 100   | 0     | 0    | 0     | 0     | 0     | 0    | 100   | 16.67       | 100         |    |
| Retene     | Standard  | 1                 | 0             | 18846         | 16.67 | 0     | 0    | 0    | 16.67 | 10    | 0     | 0     | 0     | 0     | 0     | 0     | 0     | 0     | 0     | 0     | 0    | 0     | 0     | 0     | 0    | 0     | 10          | 25          |    |
| Retene     | Standard  | 1                 | 1             | 18846         | 50    | 0     | 0    | 0    | 58.33 | 0     | 0     | 0     | 0     | 0     | 0     | 0     | 0     | 0     | 0     | 0     | 0    | 0     | 0     | 0     | 0    | 0     | 0           | 58.33       |    |
| Retene     | Standard  | 1                 | 5             | 18846         | 25    | 0     | 0    | 0    | 25    | 0     | 0     | 0     | 0     | 0     | 0     | 0     | 0     | 0     | 0     | 0     | 0    | 0     | 0     | 0     | 0    | 0     | 0           | 25          |    |
| Retene     | Standard  | 1                 | 20            | 18846         | 16.67 | 0     | 0    | 0    | 16.67 | 10    | 10    | 10    | 10    | 10    | 0     | 10    | 0     | 0     | 10    | 10    | 0    | 0     | 0     | 20    | 10   | 0     | 20          | 33.33       |    |
| Retene     | Standard  | 1                 | 30            | 18846         | 25    | 0     | 0    | 0    | 33.33 | 50    | 25    | 50    | 50    | 37.5  | 0     | 50    | 25    | 0     | 50    | 50    | 0    | 0     | 50    | 50    | 0    | 0     | 44.44       | 66.67       |    |
| Retene     | Standard  | 1                 | 45            | 18846         | 8.33  | 0     | 0    | 0    | 41.67 | 100   | 71.43 | 100   | 100   | 100   | 14.29 | 85.71 | 85.71 | 0     | 100   | 85.71 | 0    | 0     | 85.71 | 85.71 | 0    | 0     | 63.64       | 100         |    |
| Retene     | Standard  | 1                 | 65            | 18846         | 33.33 | 0     | 0    | 0    | 75    | 100   | 100   | 100   | 100   | 100   | 0     | 100   | 100   | 0     | 100   | 100   | 0    | 0     | 100   | 100   | 0    | 0     | 37.5        | 100         |    |
| Retene     | Standard  | 1                 | 100           | 18846         | 33.33 | 0     | 0    | 0    | 91.67 | 100   | 100   | 100   | 100   | 100   | 0     | 100   | 100   | 0     | 100   | 100   | 0    | 0     | 100   | 0     | 0    | 0     | 12.5        | 100         |    |
| Retene     | Standard  | 2                 | 0             | 19006         | 8.33  | 0     | 0    | 0    | 8.33  | 0     | 0     | 0     | 0     | 0     | 0     | 0     | 0     | 0     | 0     | 0     | 0    | 0     | 0     | 0     | 0    | 0     | 0           | 8.33        |    |
| Retene     | Standard  | 2                 | 1             | 19006         | 18.18 | 0     | 0    | 0    | 18.18 | 11.11 | 11.11 | 11.11 | 11.11 | 11.11 | 0     | 11.11 | 0     | 0     | 11.11 | 0     | 0    | 0     | 0     | 0     | 0    | 0     | 11.11       | 27.27       |    |
| Retene     | Standard  | 2                 | 5             | 19006         | 16.67 | 0     | 0    | 0    | 16.67 | 0     | 0     | 0     | 0     | 0     | 0     | 0     | 0     | 0     | 0     | 0     | 0    | 0     | 0     | 0     | 0    | 0     | 0           | 16.67       |    |
| Retene     | Standard  | 2                 | 20            | 19006         | 16.67 | 0     | 0    | 0    | 25    | 44.44 | 11.11 | 55.56 | 66.67 | 66.67 | 0     | 55.56 | 0     | 0     | 55.56 | 0     | 0    | 22.22 | 11.11 | 0     | 0    | 0     | 60          | 75          |    |
| Retene     | Standard  | 2                 | 30            | 19006         | 25    | 11.11 | 0    | 0    | 50    | 100   | 50    | 100   | 100   | 100   | 0     | 100   | 0     | 0     | 100   | 0     | 0    | 100   | 0     | 0     | 0    | 0     | 77.78       | 100         |    |
| Retene     | Standard  | 2                 | 45            | 19006         | 16.67 | 10    | 0    | 0    | 50    | 100   | 33.33 | 100   | 100   | 100   | 0     | 100   | 0     | 0     | 100   | 0     | 0    | 50    | 0     | 0     | 0    | 0     | 70          | 100         |    |
| Retene     | Standard  | 2                 | 65            | 19006         | 50    | 33.33 | 0    | 0    | 66.67 | 100   | 25    | 100   | 100   | 100   | 0     | 100   | 0     | 0     | 100   | 50    | 0    | 25    | 25    | 0     | 0    | 25    | 83.33       | 100         |    |
| Retene     | Standard  | 2                 | 100           | 19006         | 41.67 | 71.43 | 0    | 0    | 100   | NA    | NA    | NA    | NA    | NA    | NA    | NA    | NA    | NA    | NA    | NA    | NA   | NA    | NA    | NA    | NA   | NA    | 71.43       | 100         |    |
| Retene     | Standard  | 3                 | 0             | 19008         | 8.33  | 0     | 0    | 0    | 8.33  | 0     | 0     | 0     | 0     | 0     | 0     | 0     | 0     | 0     | 0     | 0     | 0    | 0     | 0     | 0     | 0    | 0     | 0           | 8.33        |    |
| Retene     | Standard  | 3                 | 1             | 19008         | 33.33 | 0     | 0    | 0    | 33.33 | 0     | 0     | 0     | 0     | 0     | 0     | 0     | 0     | 0     | 0     | 0     | 0    | 0     | 0     | 0     | 0    | 0     | 0           | 33.33       |    |
| Retene     | Standard  | 3                 | 5             | 19008         | 8.33  | 0     | 0    | 0    | 16.67 | 0     | 0     | 0     | 0     | 0     | 0     | 0     | 0     | 0     | 0     | 0     | 0    | 0     | 0     | 0     | 0    | 0     | 0           | 16.67       |    |
| Retene     | Standard  | 3                 | 20            | 19008         | 0     | 0     | 0    | 0    | 0     | 8.33  | 8.33  | 8.33  | 16.67 | 16.67 | 0     | 16.67 | 0     | 0     | 16.67 | 0     | 0    | 8.33  | 0     | 0     | 0    | 0     | 25          | 25          |    |
| Retene     | Standard  | 3                 | 30            | 19008         | 0     | 0     | 0    | 0    | 9.09  | 100   | 40    | 100   | 100   | 100   | 0     | 100   | 0     | 0     | 100   | 0     | 0    | 70    | 0     | 0     | 0    | 0     | 90.91       | 100         |    |
| Retene     | Standard  | 3                 | 45            | 19008         | 0     | 33.33 | 0    | 0    | 41.67 | 100   | 71.43 | 100   | 100   | 100   | 0     | 100   |       |       |       |       |      |       |       |       |      |       |             |             |    |

# Abamectin

Chorion on

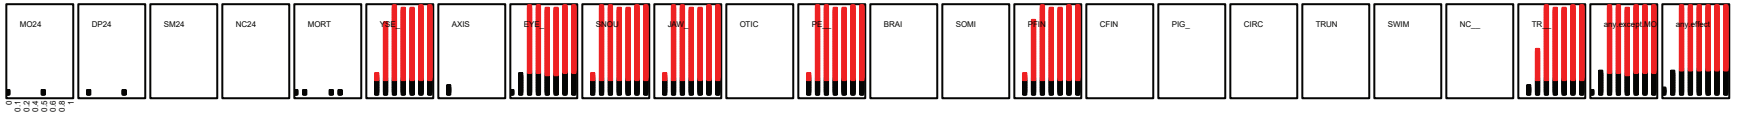

Daily Renewal

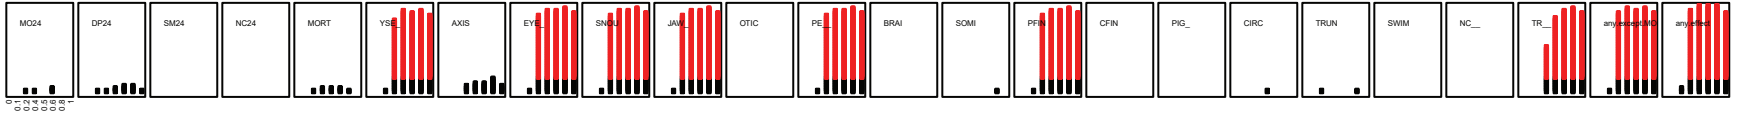

Light/Dark

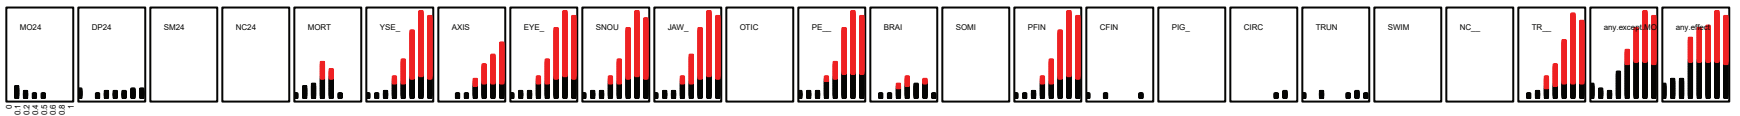

Standard

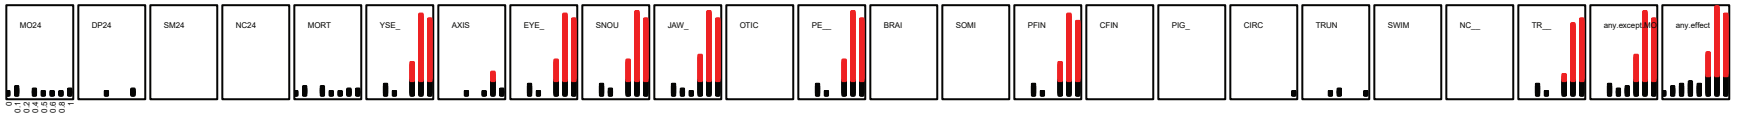

# Chlorpyrifos

Chorion on

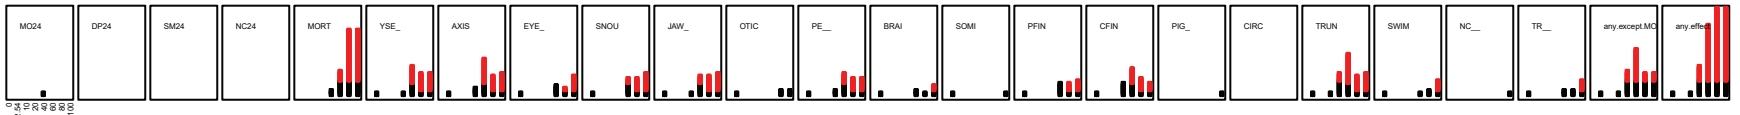

Daily Renewal

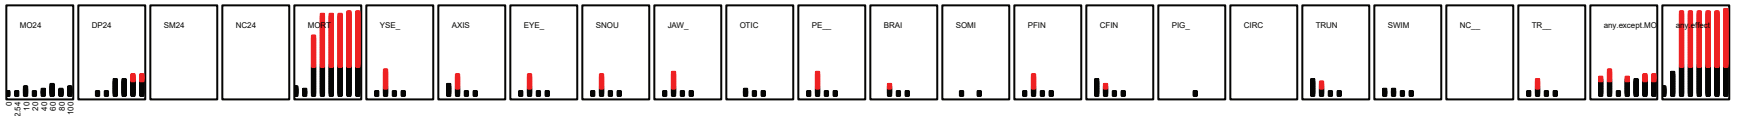

Light/Dark

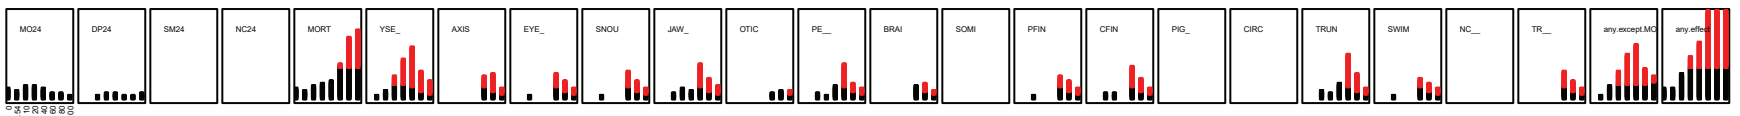

Standard

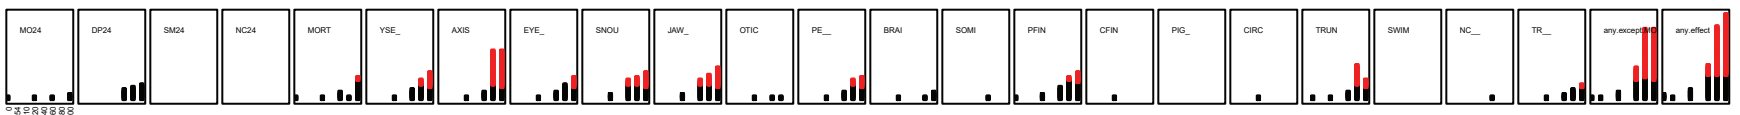

# Estradiol

Chorion on

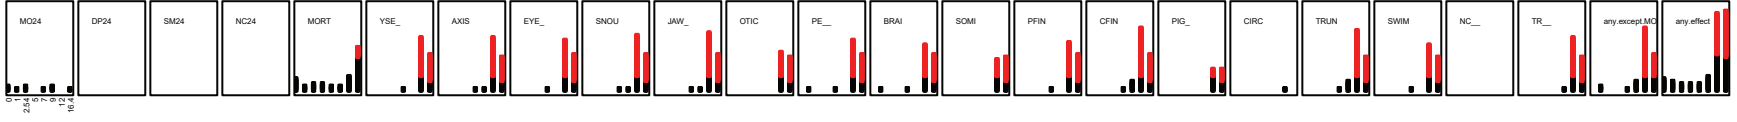

Daily Renewal

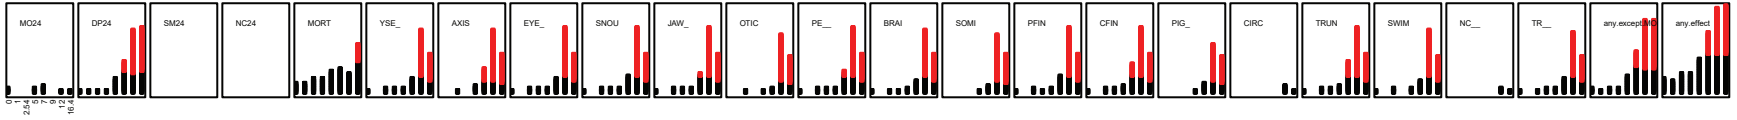

Light/Dark

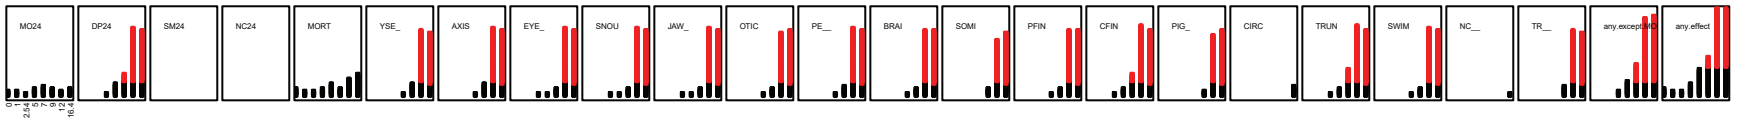

Standard

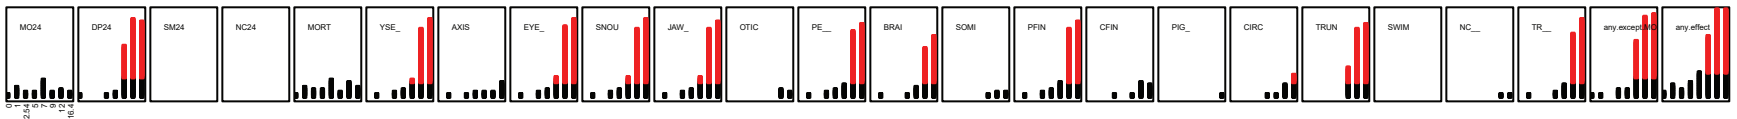

# Hydroxyurea

Chorion on

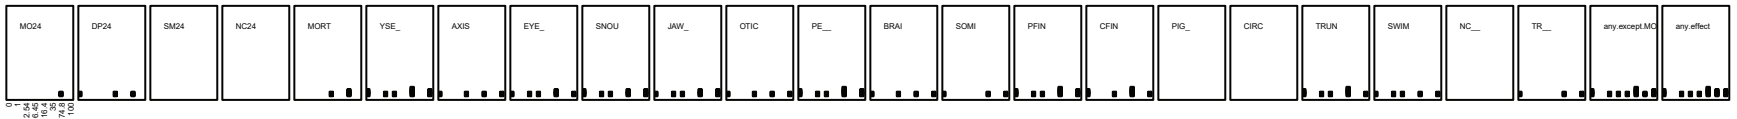

Daily Renewal

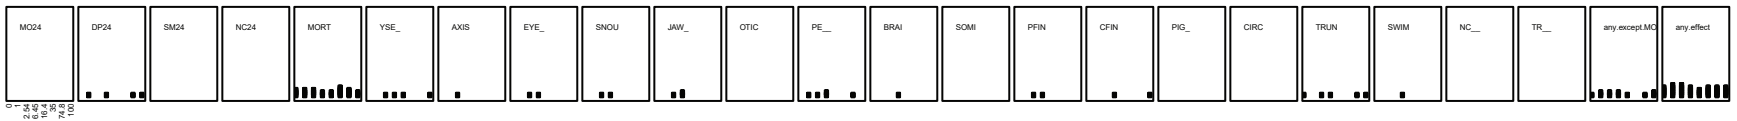

Light/Dark

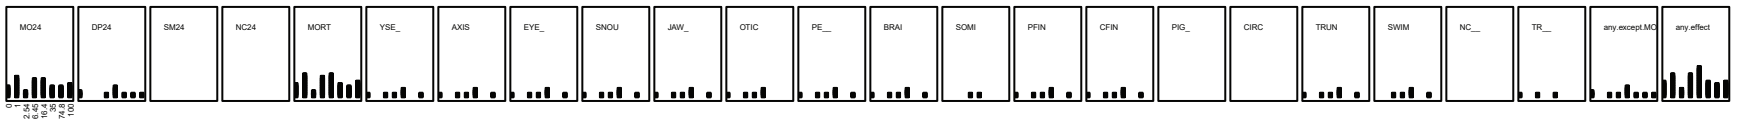

Standard

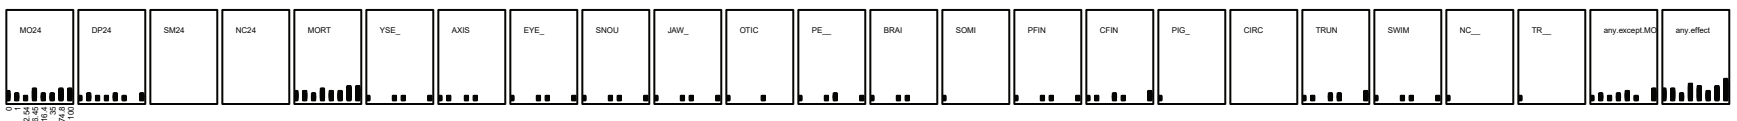

# MWCNTs

## Chorion on

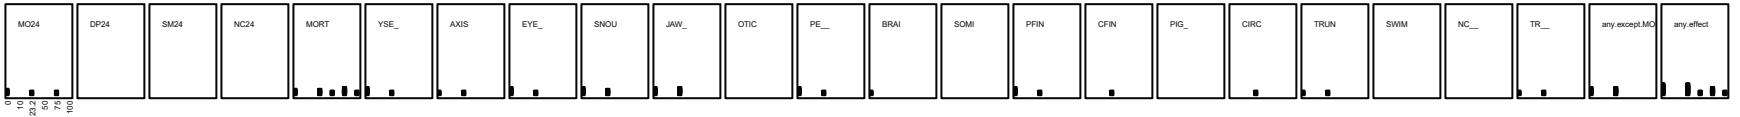

## Daily Renewal

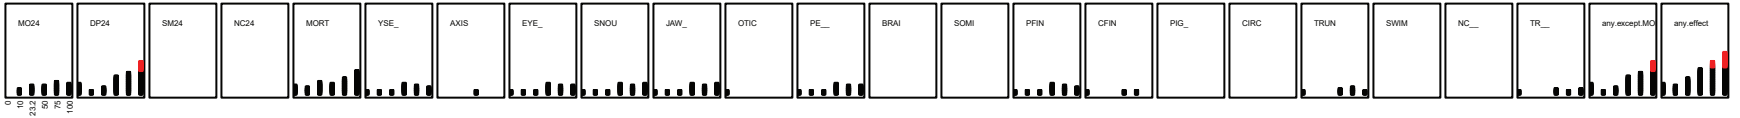

## Light/Dark

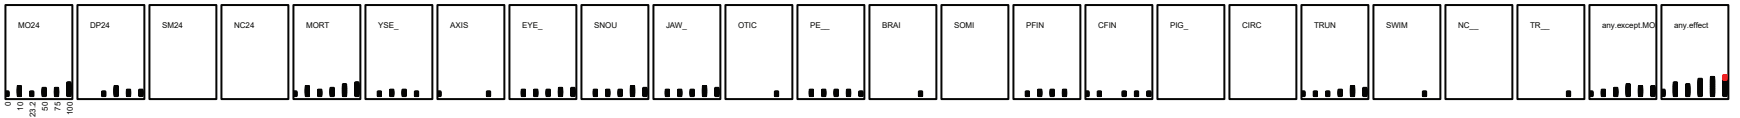

## Standard

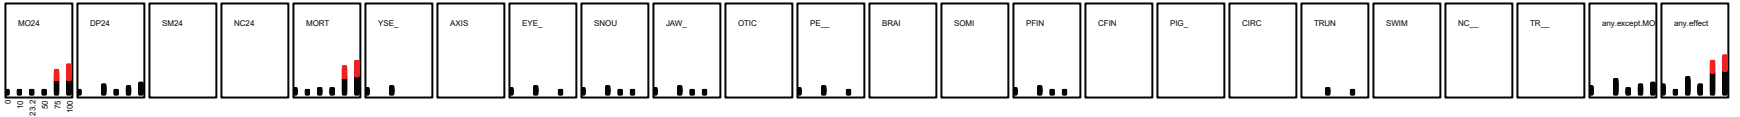

# Napthalene

## Chorion on

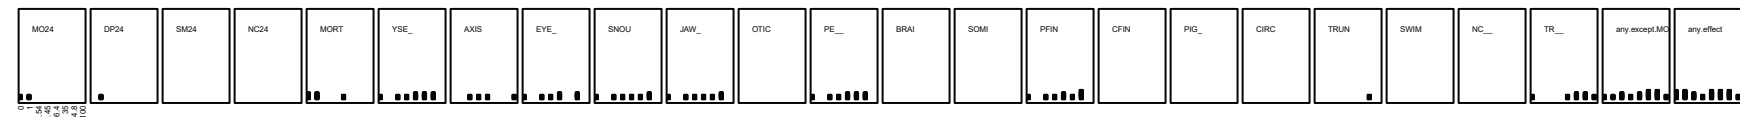

## Daily Renewal

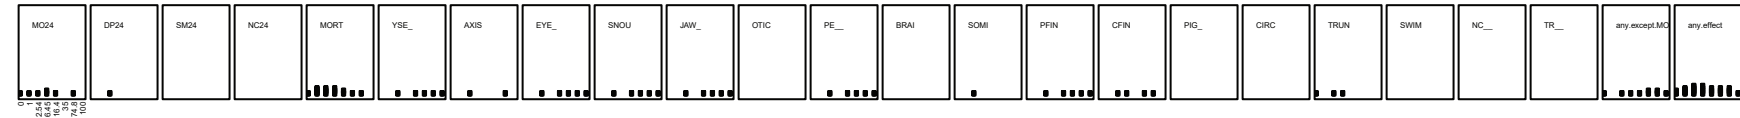

## Light/Dark

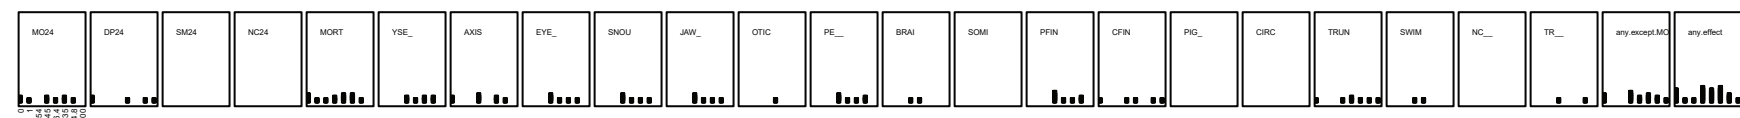

## Standard

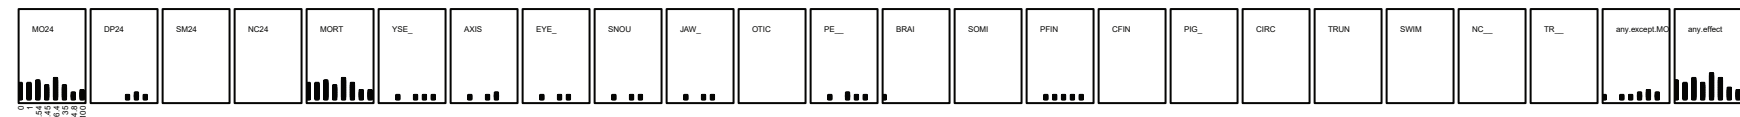

# Permethrin

Chorion on

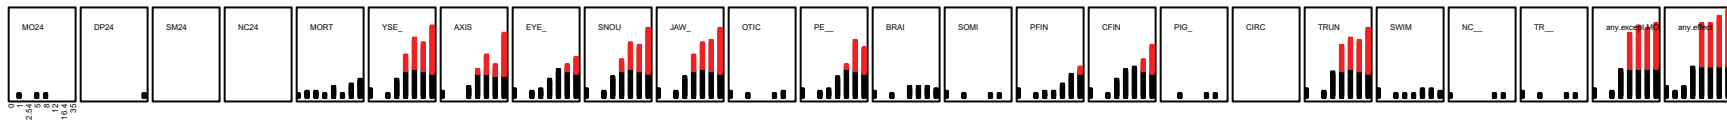

Daily Renewal

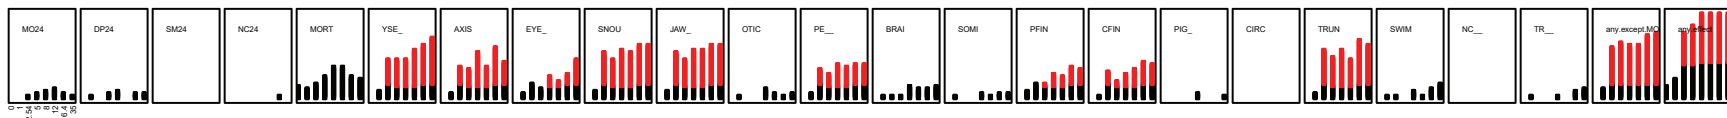

Light/Dark

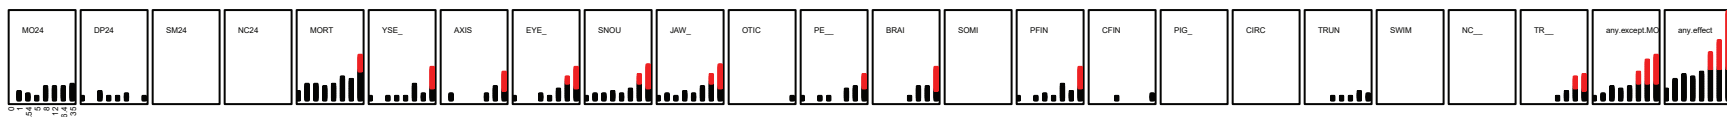

Standard

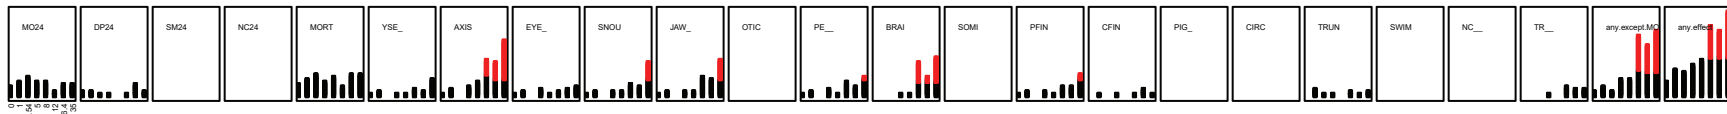

# Pyrene

Chorion on

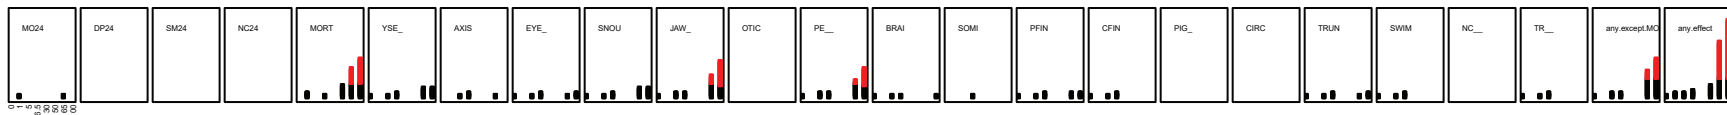

Daily Renewal

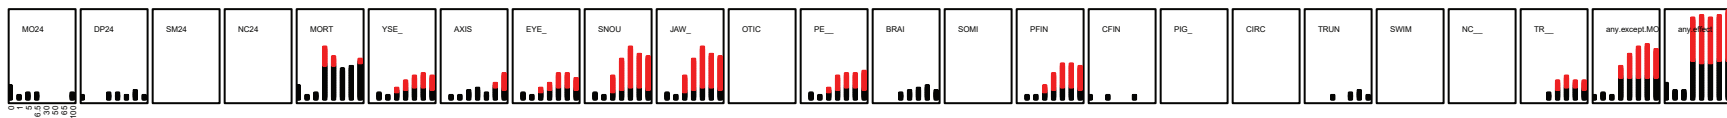

Light/Dark

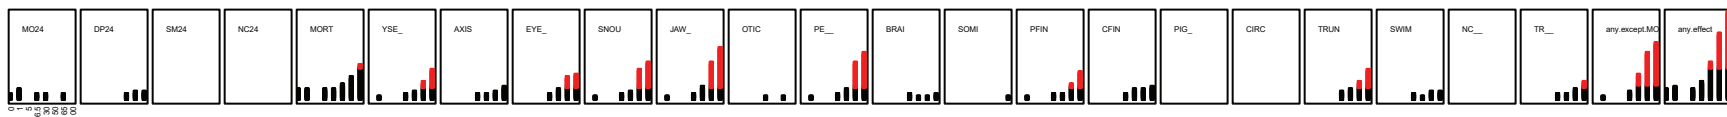

Standard

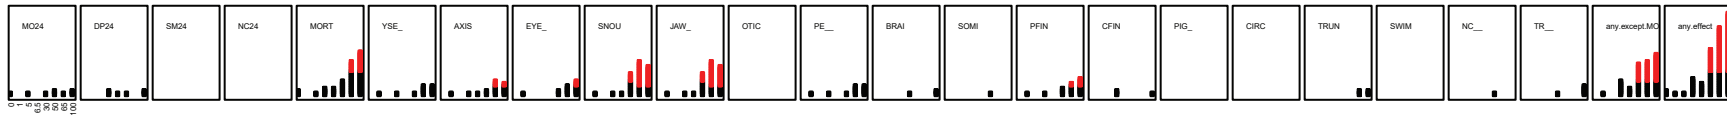



# Retene

## Chorion on

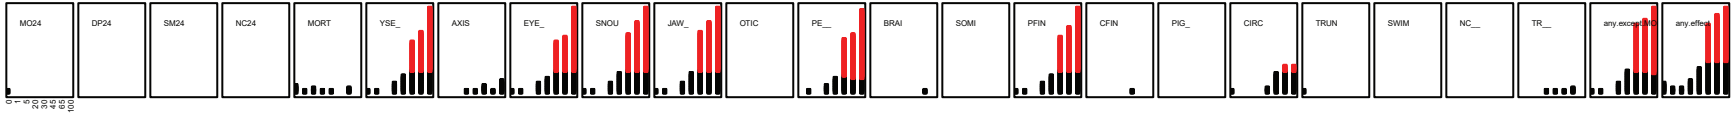

## Daily Renewal

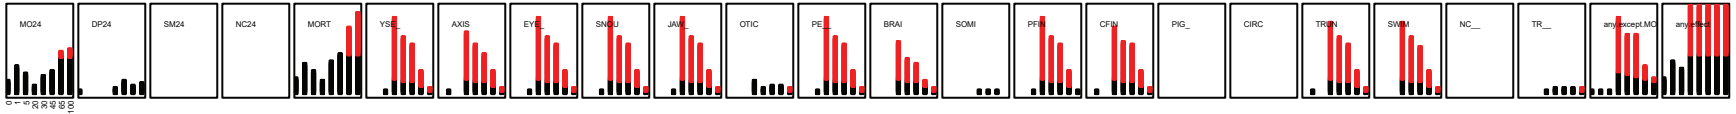

## Light/Dark

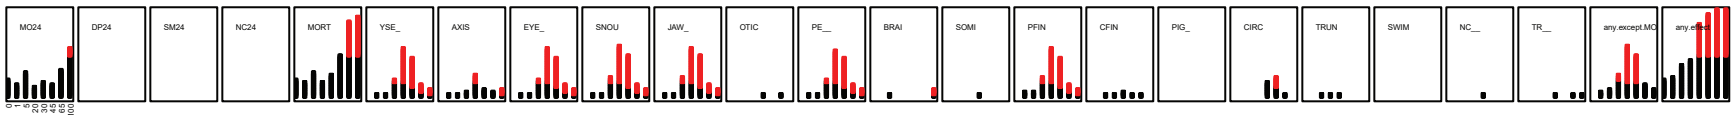

## Standard

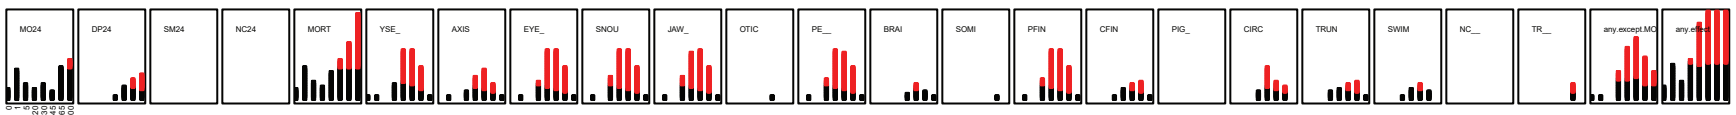

**Figure S1.** Concentration-response plots for each exposure regimen for each test agent. Each panel represents one endpoint. The horizontal axis shows concentrations (see values under first panel for each condition-chemical combination). For all chemicals, concentration units are micromolar. For MWCNTs, concentration units are micrograms per milliliter. The vertical axis shows incidence counts for each panel. Red indicates statistical significance for each measure ( $p < 0.05$ ). Endpoints for abnormal development at 24hpf: MO24 = mortality; DP24 = delayed progression; SM24 = spontaneous movement; NC24 = notochord. Endpoints at 120hpf: MORT = mortality; YSE\_ = yolk sac edema; AXIS = bent body axis; EYE\_ = eye; SNOU = snout; JAW\_ = jaw; OTIC = otic vesicle; PE\_ = pericardial edema; BRAI = brain; SOMI = somites; PFIN = pectoral fin; CFIN = caudal fin; PIG\_ = pigment; CIRC = circulatory system; TRUN = trunk; SWIM = swim bladder; NC = notochord; TR\_ = touch response; any.except.MO = any non-lethal effect; any.effect = any effect.

**Table S2.** Embryonic photomotor response (EPR) compiled data for standard and chorion-on conditions. B = background; E = excitation; R = refractory. For all chemicals, concentration units are micromolar. For MWCNTs, concentration units are micrograms per milliliter. For significance column, 1 = significant, 0 = not significant.

| Test Agent | Treatment | Concentration | Phase | Movement.peak | Movement.sd | Movement.n | ks.stat     | ks.pval     | diff         | delta        | sig |
|------------|-----------|---------------|-------|---------------|-------------|------------|-------------|-------------|--------------|--------------|-----|
| Abamectin  | Chorion   | 0             | B     | 2.840883833   | 5.677150491 | 315        | 0.205904762 | 1.34E-10    | 0            | 0            | 0   |
| Abamectin  | Chorion   | 0             | E     | 6.263985996   | 11.91415409 | 315        | 0.313015873 | 0           | 0            | 0            | 0   |
| Abamectin  | Chorion   | 0             | R     | 0.12757312    | 1.470988323 | 280        | 0.008285714 | 1           | 0            | 0            | 0   |
| Abamectin  | Chorion   | 0.1           | B     | 1.967324594   | 5.494205134 | 324        | 0.095555556 | 0.011346103 | -0.873559239 | -0.307495586 | 0   |
| Abamectin  | Chorion   | 0.1           | E     | 3.232703488   | 8.585007185 | 324        | 0.115209877 | 0.001085945 | -3.031282509 | -0.4839223   | 0   |
| Abamectin  | Chorion   | 0.1           | R     | 0.223870822   | 2.255005604 | 288        | 0.014805556 | 0.999999998 | 0.096297702  | 0.754843201  | 0   |
| Abamectin  | Chorion   | 0.2           | B     | 0.51514       | 2.693240345 | 324        | 0.024790123 | 0.994983465 | -2.325743833 | -0.818669108 | 0   |
| Abamectin  | Chorion   | 0.2           | E     | 0.632220496   | 3.791549056 | 324        | 0.047037037 | 0.557887005 | -5.631765501 | -0.899070576 | 0   |
| Abamectin  | Chorion   | 0.2           | R     | 0.121693594   | 1.365821315 | 288        | 0.006416667 | 1           | -0.005879526 | -0.0460875   | 0   |
| Abamectin  | Chorion   | 0.4           | B     | 0.000133959   | 0.00170238  | 324        | 0.068444444 | 0.140754185 | -2.840749874 | -0.999952846 | 0   |
| Abamectin  | Chorion   | 0.4           | E     | 0             | 0           | 324        | 0.094666667 | 0.01248653  | -6.263985996 | -1           | 0   |
| Abamectin  | Chorion   | 0.4           | R     | 0.000150704   | 0.001805295 | 288        | 0.006       | 1           | -0.127422416 | -0.998818685 | 0   |
| Abamectin  | Chorion   | 0.5           | B     | 0             | 0           | 315        | 0.071111111 | 0.122257802 | -2.840883833 | -1           | 0   |
| Abamectin  | Chorion   | 0.5           | E     | 0             | 0           | 315        | 0.094666667 | 0.014130572 | -6.263985996 | -1           | 0   |
| Abamectin  | Chorion   | 0.5           | R     | 0             | 0           | 280        | 0.0095      | 1           | -0.12757312  | -1           | 0   |
| Abamectin  | Chorion   | 0.6           | B     | 0             | 0           | 324        | 0.071111111 | 0.114020856 | -2.840883833 | -1           | 0   |
| Abamectin  | Chorion   | 0.6           | E     | 0             | 0           | 324        | 0.094666667 | 0.01248653  | -6.263985996 | -1           | 0   |
| Abamectin  | Chorion   | 0.6           | R     | 0.000150704   | 0.001805295 | 288        | 0.006       | 1           | -0.127422416 | -0.998818685 | 0   |
| Abamectin  | Chorion   | 0.8           | B     | 0.000133959   | 0.002411267 | 324        | 0.068024691 | 0.145390979 | -2.840749874 | -0.999952846 | 0   |
| Abamectin  | Chorion   | 0.8           | E     | 0.000133959   | 0.002411264 | 324        | 0.092       | 0.016553676 | -6.263852037 | -0.999978614 | 0   |
| Abamectin  | Chorion   | 0.8           | R     | 0             | 0           | 288        | 0.0095      | 1           | -0.12757312  | -1           | 0   |
| Abamectin  | Chorion   | 1             | B     | 0             | 0           | 324        | 0.071111111 | 0.114020856 | -2.840883833 | -1           | 0   |
| Abamectin  | Chorion   | 1             | E     | 0             | 0           | 324        | 0.094666667 | 0.01248653  | -6.263985996 | -1           | 0   |
| Abamectin  | Chorion   | 1             | R     | 0             | 0           | 288        | 0.0095      | 1           | -0.12757312  | -1           | 0   |
| Abamectin  | Standard  | 0             | B     | 7.583705645   | 14.22250459 | 315        | 0.066235548 | 0.178441492 | 0            | 0            | 0   |
| Abamectin  | Standard  | 0             | E     | 33.1041251    | 45.96385156 | 315        | 0.136246652 | 7.27E-05    | 0            | 0            | 0   |
| Abamectin  | Standard  | 0             | R     | 0.224919346   | 3.762319197 | 280        | 0.010861258 | 1           | 0            | 0            | 0   |
| Abamectin  | Standard  | 0.1           | B     | 7.82806486    | 15.52920055 | 297        | 0.051793657 | 0.484447228 | 0.244359215  | 0.032221611  | 0   |
| Abamectin  | Standard  | 0.1           | E     | 37.06984554   | 50.49734296 | 297        | 0.138338114 | 9.00E-05    | 3.965720441  | 0.119795356  | 0   |
| Abamectin  | Standard  | 0.1           | R     | 0.300613532   | 3.459653558 | 264        | 0.008511036 | 1           | 0.075694186  | 0.336539238  | 0   |
| Abamectin  | Standard  | 0.2           | B     | 6.681215257   | 14.41202168 | 324        | 0.024348422 | 0.996156506 | -0.902490388 | -0.119003879 | 0   |
| Abamectin  | Standard  | 0.2           | E     | 32.89374764   | 51.90012228 | 324        | 0.074074074 | 0.09038117  | -0.210377452 | -0.006355022 | 0   |
| Abamectin  | Standard  | 0.2           | R     | 0.41247689    | 4.124858321 | 288        | 0.007587449 | 1           | 0.187557544  | 0.833887999  | 0   |
| Abamectin  | Standard  | 0.4           | B     | 8.40524579    | 17.15110593 | 306        | 0.089876005 | 0.026157596 | 0.821540146  | 0.108329646  | 0   |
| Abamectin  | Standard  | 0.4           | E     | 25.11964103   | 41.80847221 | 306        | 0.035369429 | 0.890210001 | -7.984484069 | -0.241193025 | 0   |
| Abamectin  | Standard  | 0.4           | R     | 0.895900281   | 8.539734817 | 272        | 0.007942992 | 1           | 0.670980935  | 2.983206848  | 0   |
| Abamectin  | Standard  | 0.5           | B     | 5.702987905   | 13.2121096  | 315        | 0.024090404 | 0.997218318 | -1.880717739 | -0.247994559 | 0   |
| Abamectin  | Standard  | 0.5           | E     | 23.439912     | 40.09082541 | 315        | 0.073107322 | 0.105375373 | -9.664213095 | -0.291933802 | 0   |
| Abamectin  | Standard  | 0.5           | R     | 0.598803361   | 4.747440412 | 280        | 0.014138742 | 1           | 0.373884015  | 1.662302602  | 0   |
| Abamectin  | Standard  | 0.6           | B     | 5.977665263   | 14.08336905 | 315        | 0.024129597 | 0.997152361 | -1.606040382 | -0.211775148 | 0   |
| Abamectin  | Standard  | 0.6           | E     | 14.85298236   | 32.47182157 | 315        | 0.09367039  | 0.015944711 | -18.25114274 | -0.551325331 | 0   |
| Abamectin  | Standard  | 0.6           | R     | 0.000232515   | 0.00223824  | 280        | 0.010288066 | 1           | -0.224686832 | -0.998966231 | 0   |
| Abamectin  | Standard  | 0.8           | B     | 1.734526867   | 7.777642253 | 315        | 0.170161343 | 2.38E-07    | -5.849178777 | -0.771282411 | 1   |
| Abamectin  | Standard  | 0.8           | E     | 1.308077518   | 7.929896115 | 315        | 0.336416487 | 0           | -31.79604758 | -0.960485966 | 1   |
| Abamectin  | Standard  | 0.8           | R     | 0.189499558   | 1.775587582 | 280        | 0.006687243 | 1           | -0.035419788 | -0.157477729 | 0   |
| Abamectin  | Standard  | 1             | B     | 0.118719382   | 2.069277544 | 306        | 0.227184701 | 1.85E-12    | -7.464986262 | -0.984345465 | 1   |

| Test Agent   | Treatment | Concentration | Phase | Movement.peak | Movement.sd | Movement.n | ks.stat     | ks.pval     | diff         | delta        | sig |
|--------------|-----------|---------------|-------|---------------|-------------|------------|-------------|-------------|--------------|--------------|-----|
| Abamectin    | Standard  | 1             | E     | 0.094535753   | 1.439365191 | 306        | 0.364614433 | 0           | -33.00958934 | -0.997144291 | 1   |
| Abamectin    | Standard  | 1             | R     | 0             | 0           | 272        | 0.018004115 | 0.999998934 | -0.224919346 | -1           | 0   |
| Chlorpyrifos | Chorion   | 0             | B     | 2.175564585   | 6.215975661 | 324        | 0           | 1           | 0            | 0            | 0   |
| Chlorpyrifos | Chorion   | 0             | E     | 6.621937966   | 12.4776157  | 324        | 0           | 1           | 0            | 0            | 0   |
| Chlorpyrifos | Chorion   | 0             | R     | 0.367190508   | 2.603513428 | 288        | 0           | 1           | 0            | 0            | 0   |
| Chlorpyrifos | Chorion   | 2.54          | B     | 2.919707467   | 7.119270656 | 324        | 0.064814815 | 0.504120853 | 0.744142882  | 0.34204587   | 0   |
| Chlorpyrifos | Chorion   | 2.54          | E     | 5.679869419   | 10.42340727 | 324        | 0.043209877 | 0.922844972 | -0.942068548 | -0.14226478  | 0   |
| Chlorpyrifos | Chorion   | 2.54          | R     | 0.982666299   | 4.748785837 | 288        | 0.052083333 | 0.829553062 | 0.615475791  | 1.676175658  | 0   |
| Chlorpyrifos | Chorion   | 10            | B     | 3.523059885   | 8.007986284 | 324        | 0.067901235 | 0.443946011 | 1.3474953    | 0.619377291  | 0   |
| Chlorpyrifos | Chorion   | 10            | E     | 4.170885821   | 8.771769186 | 324        | 0.111111111 | 0.036631053 | -2.451052145 | -0.370141212 | 0   |
| Chlorpyrifos | Chorion   | 10            | R     | 1.52708427    | 5.150247004 | 288        | 0.079861111 | 0.317377205 | 1.159893762  | 3.158833731  | 0   |
| Chlorpyrifos | Chorion   | 20            | B     | 3.519777888   | 8.049913838 | 324        | 0.083333333 | 0.210551633 | 1.344213303  | 0.617868719  | 0   |
| Chlorpyrifos | Chorion   | 20            | E     | 4.247979611   | 8.445109939 | 324        | 0.12654321  | 0.01116329  | -2.373958355 | -0.358499033 | 0   |
| Chlorpyrifos | Chorion   | 20            | R     | 2.4090803     | 6.919293759 | 288        | 0.159722222 | 0.00128876  | 2.041889792  | 5.560845794  | 1   |
| Chlorpyrifos | Chorion   | 40            | B     | 2.533826889   | 5.679868094 | 315        | 0.103174603 | 0.066717209 | 0.358262304  | 0.164675554  | 0   |
| Chlorpyrifos | Chorion   | 40            | E     | 2.455494736   | 5.948779181 | 315        | 0.159876543 | 0.000568895 | -4.16644323  | -0.629187898 | 1   |
| Chlorpyrifos | Chorion   | 40            | R     | 1.806795776   | 4.847366888 | 280        | 0.186507937 | 0.00010268  | 1.439605268  | 3.920594996  | 1   |
| Chlorpyrifos | Chorion   | 60            | B     | 2.640000848   | 6.225057068 | 324        | 0.089506173 | 0.14912849  | 0.464436263  | 0.213478499  | 0   |
| Chlorpyrifos | Chorion   | 60            | E     | 2.549376632   | 6.041515815 | 324        | 0.154320988 | 0.000891235 | -4.072561334 | -0.615010493 | 1   |
| Chlorpyrifos | Chorion   | 60            | R     | 1.862928428   | 5.391386357 | 288        | 0.177083333 | 0.000239226 | 1.49573792   | 4.073465647  | 1   |
| Chlorpyrifos | Chorion   | 80            | B     | 2.732700478   | 6.286378345 | 324        | 0.114197531 | 0.029241551 | 0.557135893  | 0.256087958  | 0   |
| Chlorpyrifos | Chorion   | 80            | E     | 3.146365672   | 7.106118797 | 324        | 0.132716049 | 0.006646646 | -3.475572294 | -0.524857272 | 1   |
| Chlorpyrifos | Chorion   | 80            | R     | 2.023051374   | 5.353777839 | 288        | 0.197916667 | 2.52E-05    | 1.655860866  | 4.509541587  | 1   |
| Chlorpyrifos | Chorion   | 100           | B     | 2.206442181   | 5.14436284  | 324        | 0.080246914 | 0.247786694 | 0.030877595  | 0.014192911  | 0   |
| Chlorpyrifos | Chorion   | 100           | E     | 2.511600483   | 6.235739176 | 324        | 0.151234568 | 0.001209744 | -4.110337484 | -0.62071519  | 1   |
| Chlorpyrifos | Chorion   | 100           | R     | 2.233962183   | 5.664175317 | 288        | 0.208333333 | 7.45E-06    | 1.866771674  | 5.083932274  | 1   |
| Chlorpyrifos | Standard  | 0             | B     | 8.727746981   | 15.56061454 | 315        | 0           | 1           | 0            | 0            | 0   |
| Chlorpyrifos | Standard  | 0             | E     | 30.81996773   | 37.00450783 | 315        | 0           | 1           | 0            | 0            | 0   |
| Chlorpyrifos | Standard  | 0             | R     | 0.075412377   | 1.261890431 | 280        | 0           | 1           | 0            | 0            | 0   |
| Chlorpyrifos | Standard  | 2.54          | B     | 7.739425508   | 13.01655983 | 324        | 0.032892416 | 0.995216982 | -0.988321472 | -0.113239015 | 0   |
| Chlorpyrifos | Standard  | 2.54          | E     | 24.58981607   | 34.31619027 | 324        | 0.102910053 | 0.067889171 | -6.230151666 | -0.202146599 | 0   |
| Chlorpyrifos | Standard  | 2.54          | R     | 1.298466424   | 6.899656785 | 288        | 0.045039683 | 0.935580803 | 1.223054046  | 16.21821366  | 0   |
| Chlorpyrifos | Standard  | 10            | B     | 8.487319373   | 13.37400684 | 324        | 0.054850088 | 0.722533857 | -0.240427607 | -0.0275475   | 0   |
| Chlorpyrifos | Standard  | 10            | E     | 17.09252372   | 26.71959311 | 324        | 0.23659612  | 3.43E-08    | -13.72744401 | -0.445407475 | 0   |
| Chlorpyrifos | Standard  | 10            | R     | 1.711470889   | 6.651658098 | 288        | 0.083234127 | 0.278979336 | 1.636058511  | 21.69482745  | 0   |
| Chlorpyrifos | Standard  | 20            | B     | 8.860849627   | 14.45523894 | 315        | 0.034920635 | 0.990716312 | 0.133102647  | 0.015250516  | 0   |
| Chlorpyrifos | Standard  | 20            | E     | 10.23657928   | 15.1974654  | 315        | 0.301587302 | 7.21E-13    | -20.58338845 | -0.667858858 | 1   |
| Chlorpyrifos | Standard  | 20            | R     | 3.996930837   | 10.47431597 | 280        | 0.178571429 | 0.000265094 | 3.92151846   | 52.00099246  | 1   |
| Chlorpyrifos | Standard  | 40            | B     | 7.471372478   | 13.47420362 | 324        | 0.048324515 | 0.849772551 | -1.256374502 | -0.143951756 | 0   |
| Chlorpyrifos | Standard  | 40            | E     | 7.687249294   | 14.80475874 | 324        | 0.328571429 | 2.11E-15    | -23.13271844 | -0.750575686 | 1   |
| Chlorpyrifos | Standard  | 40            | R     | 4.351279465   | 10.48282515 | 288        | 0.222123016 | 1.65E-06    | 4.275867088  | 56.69980506  | 1   |
| Chlorpyrifos | Standard  | 60            | B     | 5.81721176    | 11.01724319 | 315        | 0.104761905 | 0.063037405 | -2.910535221 | -0.333480706 | 0   |
| Chlorpyrifos | Standard  | 60            | E     | 4.760251339   | 11.29012163 | 315        | 0.387301587 | 0           | -26.05971639 | -0.845546518 | 1   |
| Chlorpyrifos | Standard  | 60            | R     | 3.139338205   | 8.760782266 | 280        | 0.189285714 | 8.79E-05    | 3.063925827  | 40.62895164  | 1   |
| Chlorpyrifos | Standard  | 80            | B     | 4.281870989   | 9.545751409 | 324        | 0.149029982 | 0.001659034 | -4.445875992 | -0.509395609 | 1   |
| Chlorpyrifos | Standard  | 80            | E     | 3.712411807   | 8.748233732 | 324        | 0.401851852 | 0           | -27.10755592 | -0.87954524  | 1   |

| Test Agent   | Treatment | Concentration | Phase | Movement.peak | Movement.sd | Movement.n | ks.stat     | ks.pval     | diff         | delta        | sig |
|--------------|-----------|---------------|-------|---------------|-------------|------------|-------------|-------------|--------------|--------------|-----|
| Chlorpyrifos | Standard  | 80            | R     | 2.567922051   | 7.507023314 | 288        | 0.159623016 | 0.001442183 | 2.492509674  | 33.0517319   | 1   |
| Chlorpyrifos | Standard  | 100           | B     | 2.326658511   | 6.315099215 | 306        | 0.210644258 | 2.08E-06    | -6.40108847  | -0.733418199 | 1   |
| Chlorpyrifos | Standard  | 100           | E     | 2.473249019   | 7.000925748 | 306        | 0.43286648  | 0           | -28.34671871 | -0.919751732 | 1   |
| Chlorpyrifos | Standard  | 100           | R     | 1.301205726   | 4.534114429 | 272        | 0.121428571 | 0.034197769 | 1.225793349  | 16.25453797  | 0   |
| Estradiol    | Chorion   | 0             | B     | 2.931744234   | 9.388770973 | 306        | 0           | 1           | 0            | 0            | 0   |
| Estradiol    | Chorion   | 0             | E     | 3.8853287     | 9.956068172 | 306        | 0           | 1           | 0            | 0            | 0   |
| Estradiol    | Chorion   | 0             | R     | 0.777260808   | 4.233908858 | 272        | 0           | 1           | 0            | 0            | 0   |
| Estradiol    | Chorion   | 1             | B     | 2.942570916   | 7.134867533 | 315        | 0.065546218 | 0.517360423 | 0.010826683  | 0.003692915  | 0   |
| Estradiol    | Chorion   | 1             | E     | 5.360242862   | 11.17937865 | 315        | 0.071615313 | 0.40355245  | 1.474914163  | 0.379611167  | 0   |
| Estradiol    | Chorion   | 1             | R     | 0.424726896   | 3.279231891 | 280        | 0.02237395  | 0.999999833 | -0.352533912 | -0.453559356 | 0   |
| Estradiol    | Chorion   | 2.54          | B     | 2.698914971   | 7.211232211 | 306        | 0.026143791 | 0.99994167  | -0.232829262 | -0.079416635 | 0   |
| Estradiol    | Chorion   | 2.54          | E     | 4.186311789   | 10.54707956 | 306        | 0.032679739 | 0.996738369 | 0.300983089  | 0.07746657   | 0   |
| Estradiol    | Chorion   | 2.54          | R     | 0.582427074   | 4.124574459 | 272        | 0.014705882 | 1           | -0.194833734 | -0.250667128 | 0   |
| Estradiol    | Chorion   | 5             | B     | 2.06056049    | 5.520859701 | 324        | 0.036310821 | 0.985600275 | -0.871183744 | -0.297155439 | 0   |
| Estradiol    | Chorion   | 5             | E     | 3.795800846   | 8.922149099 | 324        | 0.031771968 | 0.997333967 | -0.089527854 | -0.023042543 | 0   |
| Estradiol    | Chorion   | 5             | R     | 0.130886485   | 1.59845809  | 288        | 0.033496732 | 0.997558956 | -0.646374323 | -0.831605448 | 0   |
| Estradiol    | Chorion   | 7             | B     | 2.057843171   | 5.648026079 | 315        | 0.042763772 | 0.939049148 | -0.873901063 | -0.2980823   | 0   |
| Estradiol    | Chorion   | 7             | E     | 3.332644171   | 7.700770049 | 315        | 0.057609711 | 0.681540148 | -0.552684528 | -0.142249104 | 0   |
| Estradiol    | Chorion   | 7             | R     | 0.383494511   | 3.01894041  | 280        | 0.022584034 | 0.99999977  | -0.393766297 | -0.506607683 | 0   |
| Estradiol    | Chorion   | 9             | B     | 1.794264714   | 4.945235401 | 306        | 0.052287582 | 0.797010175 | -1.13747952  | -0.387987297 | 0   |
| Estradiol    | Chorion   | 9             | E     | 3.481796319   | 8.279801614 | 306        | 0.055555556 | 0.732450588 | -0.403532381 | -0.103860551 | 0   |
| Estradiol    | Chorion   | 9             | R     | 0.639153616   | 3.477943487 | 272        | 0.018382353 | 1           | -0.138107193 | -0.177684493 | 0   |
| Estradiol    | Chorion   | 12            | B     | 0.568522804   | 3.14195854  | 324        | 0.106572259 | 0.056044298 | -2.363221429 | -0.806080354 | 0   |
| Estradiol    | Chorion   | 12            | E     | 0.655194644   | 2.539822184 | 324        | 0.129266521 | 0.010397876 | -3.230134056 | -0.831366998 | 0   |
| Estradiol    | Chorion   | 12            | R     | 0.080928067   | 0.87083413  | 288        | 0.03002451  | 0.999601982 | -0.696332741 | -0.895880423 | 0   |
| Estradiol    | Chorion   | 16.4          | B     | 0.027281728   | 0.32992823  | 315        | 0.154061625 | 0.001262051 | -2.904462506 | -0.99069437  | 1   |
| Estradiol    | Chorion   | 16.4          | E     | 0.073853649   | 0.65898057  | 315        | 0.209897292 | 2.30E-06    | -3.811475051 | -0.98099166  | 1   |
| Estradiol    | Chorion   | 16.4          | R     | 0.032552041   | 0.319028128 | 280        | 0.040441176 | 0.977718411 | -0.744708767 | -0.958119539 | 0   |
| Estradiol    | Standard  | 0             | B     | 7.54788138    | 14.27310548 | 315        | 0           | 1           | 0            | 0            | 0   |
| Estradiol    | Standard  | 0             | E     | 18.00354161   | 28.86722414 | 315        | 0           | 1           | 0            | 0            | 0   |
| Estradiol    | Standard  | 0             | R     | 0.904482898   | 5.20484744  | 280        | 0           | 1           | 0            | 0            | 0   |
| Estradiol    | Standard  | 1             | B     | 7.860198027   | 13.85759465 | 288        | 0.035615079 | 0.99106429  | 0.312316648  | 0.041378055  | 0   |
| Estradiol    | Standard  | 1             | E     | 19.77832864   | 34.20886478 | 288        | 0.036507937 | 0.988086858 | 1.774787024  | 0.098579883  | 0   |
| Estradiol    | Standard  | 1             | R     | 0.407409538   | 3.423629288 | 256        | 0.020089286 | 0.999999999 | -0.497073361 | -0.549566345 | 0   |
| Estradiol    | Standard  | 2.54          | B     | 6.512473395   | 12.96199406 | 306        | 0.048926237 | 0.851385221 | -1.035407984 | -0.137178624 | 0   |
| Estradiol    | Standard  | 2.54          | E     | 19.03956405   | 30.40158071 | 306        | 0.038935574 | 0.972692225 | 1.036022433  | 0.057545479  | 0   |
| Estradiol    | Standard  | 2.54          | R     | 0.502403114   | 3.564155667 | 272        | 0.020798319 | 0.999999989 | -0.402079784 | -0.444541058 | 0   |
| Estradiol    | Standard  | 5             | B     | 7.060894826   | 12.62941685 | 306        | 0.034173669 | 0.993481325 | -0.486986554 | -0.064519635 | 0   |
| Estradiol    | Standard  | 5             | E     | 22.55157301   | 32.84473258 | 306        | 0.069747899 | 0.436978666 | 4.548031397  | 0.252618707  | 0   |
| Estradiol    | Standard  | 5             | R     | 0.572613391   | 4.515199628 | 272        | 0.017542017 | 1           | -0.331869508 | -0.366916288 | 0   |
| Estradiol    | Standard  | 7             | B     | 4.454854211   | 10.74566844 | 261        | 0.127093596 | 0.019881446 | -3.093027169 | -0.409787464 | 0   |
| Estradiol    | Standard  | 7             | E     | 15.48290227   | 26.19715191 | 261        | 0.051997811 | 0.834993118 | -2.52063934  | -0.140007971 | 0   |
| Estradiol    | Standard  | 7             | R     | 0.776760248   | 5.07936565  | 232        | 0.011330049 | 1           | -0.12772265  | -0.141210686 | 0   |
| Estradiol    | Standard  | 9             | B     | 4.008799473   | 9.813632787 | 306        | 0.133986928 | 0.007597528 | -3.539081907 | -0.468884145 | 0   |
| Estradiol    | Standard  | 9             | E     | 8.894235048   | 20.52793038 | 306        | 0.183660131 | 5.67E-05    | -9.109306564 | -0.505973034 | 1   |
| Estradiol    | Standard  | 9             | R     | 0.189488257   | 2.040087006 | 272        | 0.028361345 | 0.999888151 | -0.714994642 | -0.790501007 | 0   |

| Test Agent  | Treatment | Concentration | Phase | Movement.peak | Movement.sd | Movement.n | ks.stat     | ks.pval     | diff         | delta        | sig |
|-------------|-----------|---------------|-------|---------------|-------------|------------|-------------|-------------|--------------|--------------|-----|
| Estradiol   | Standard  | 12            | B     | 0.222786313   | 3.329281721 | 297        | 0.326599327 | 1.38E-14    | -7.325095066 | -0.970483596 | 1   |
| Estradiol   | Standard  | 12            | E     | 0.91555014    | 4.253400551 | 297        | 0.34987975  | 1.11E-16    | -17.08799147 | -0.949146109 | 1   |
| Estradiol   | Standard  | 12            | R     | 0             | 0           | 264        | 0.042857143 | 0.964213451 | -0.904482898 | -1           | 0   |
| Estradiol   | Standard  | 16.4          | B     | 0             | 0           | 306        | 0.336507937 | 1.11E-15    | -7.54788138  | -1           | 1   |
| Estradiol   | Standard  | 16.4          | E     | 0.000567357   | 0.009924695 | 306        | 0.431652661 | 0           | -18.00297425 | -0.999968486 | 1   |
| Estradiol   | Standard  | 16.4          | R     | 7.98E-05      | 0.001315839 | 272        | 0.039285714 | 0.983449574 | -0.904403114 | -0.99991179  | 0   |
| Hydroxyurea | Chorion   | 0             | B     | 3.276641885   | 6.962481751 | 324        | 0           | 1           | 0            | 0            | 0   |
| Hydroxyurea | Chorion   | 0             | E     | 5.271226601   | 10.66013218 | 324        | 0           | 1           | 0            | 0            | 0   |
| Hydroxyurea | Chorion   | 0             | R     | 0.720667123   | 4.437447827 | 288        | 0           | 1           | 0            | 0            | 0   |
| Hydroxyurea | Chorion   | 1             | B     | 3.443554892   | 6.815326591 | 324        | 0.043209877 | 0.922844972 | 0.166913007  | 0.050940265  | 0   |
| Hydroxyurea | Chorion   | 1             | E     | 5.649393742   | 11.27341288 | 324        | 0.021604938 | 0.999999251 | 0.378167141  | 0.071741773  | 0   |
| Hydroxyurea | Chorion   | 1             | R     | 0.552933016   | 3.561209026 | 288        | 0.013888889 | 1           | -0.167734107 | -0.232748382 | 0   |
| Hydroxyurea | Chorion   | 2.54          | B     | 4.007187878   | 7.614713058 | 324        | 0.058641975 | 0.633246263 | 0.730545993  | 0.222955702  | 0   |
| Hydroxyurea | Chorion   | 2.54          | E     | 7.14611909    | 13.14508576 | 324        | 0.067901235 | 0.443946011 | 1.874892488  | 0.355684289  | 0   |
| Hydroxyurea | Chorion   | 2.54          | R     | 0.561674053   | 3.38211411  | 288        | 0.010416667 | 1           | -0.15899307  | -0.220619292 | 0   |
| Hydroxyurea | Chorion   | 6.45          | B     | 3.659296324   | 6.949379436 | 324        | 0.049382716 | 0.824393461 | 0.382654438  | 0.116782502  | 0   |
| Hydroxyurea | Chorion   | 6.45          | E     | 7.126629271   | 13.00460493 | 324        | 0.067901235 | 0.443946011 | 1.855402669  | 0.351986892  | 0   |
| Hydroxyurea | Chorion   | 6.45          | R     | 0.554289577   | 4.433611145 | 288        | 0.024305556 | 0.999995675 | -0.166377546 | -0.230866014 | 0   |
| Hydroxyurea | Chorion   | 16.4          | B     | 3.961106131   | 7.346398591 | 324        | 0.074074074 | 0.336404876 | 0.684464246  | 0.208891991  | 0   |
| Hydroxyurea | Chorion   | 16.4          | E     | 6.083220518   | 11.77569332 | 324        | 0.052469136 | 0.763912024 | 0.811993916  | 0.154042688  | 0   |
| Hydroxyurea | Chorion   | 16.4          | R     | 0.514805425   | 3.610727646 | 288        | 0.013888889 | 1           | -0.205861698 | -0.28565435  | 0   |
| Hydroxyurea | Chorion   | 35            | B     | 3.474767143   | 6.870747304 | 324        | 0.049382716 | 0.824393461 | 0.198125258  | 0.060465948  | 0   |
| Hydroxyurea | Chorion   | 35            | E     | 7.196422142   | 13.85785829 | 324        | 0.067901235 | 0.443946011 | 1.925195541  | 0.36522724   | 0   |
| Hydroxyurea | Chorion   | 35            | R     | 0.685778959   | 3.68063026  | 288        | 0.013888889 | 1           | -0.034888164 | -0.048410928 | 0   |
| Hydroxyurea | Chorion   | 74.8          | B     | 4.266561725   | 8.114568595 | 315        | 0.090564374 | 0.145551129 | 0.98991984   | 0.302114138  | 0   |
| Hydroxyurea | Chorion   | 74.8          | E     | 5.543154784   | 11.68585081 | 315        | 0.025396825 | 0.999950829 | 0.271928182  | 0.051587269  | 0   |
| Hydroxyurea | Chorion   | 74.8          | R     | 0.304672046   | 2.967210022 | 280        | 0.027380952 | 0.999928919 | -0.415995077 | -0.577236096 | 0   |
| Hydroxyurea | Chorion   | 100           | B     | 4.201563327   | 7.338696811 | 324        | 0.089506173 | 0.14912849  | 0.924921441  | 0.282277244  | 0   |
| Hydroxyurea | Chorion   | 100           | E     | 7.350876431   | 13.25176507 | 324        | 0.089506173 | 0.14912849  | 2.07964983   | 0.394528634  | 0   |
| Hydroxyurea | Chorion   | 100           | R     | 0.578176176   | 3.722006902 | 288        | 0.010416667 | 1           | -0.142490947 | -0.197720893 | 0   |
| Hydroxyurea | Standard  | 0             | B     | 7.420997821   | 13.51054451 | 297        | 0           | 1           | 0            | 0            | 0   |
| Hydroxyurea | Standard  | 0             | E     | 15.02203802   | 24.83864492 | 297        | 0           | 1           | 0            | 0            | 0   |
| Hydroxyurea | Standard  | 0             | R     | 0.979685908   | 6.59235631  | 264        | 0           | 1           | 0            | 0            | 0   |
| Hydroxyurea | Standard  | 1             | B     | 9.320107282   | 15.22625853 | 306        | 0.072984749 | 0.398267371 | 1.899109461  | 0.255910257  | 0   |
| Hydroxyurea | Standard  | 1             | E     | 25.12985394   | 39.00203059 | 306        | 0.110516934 | 0.050359538 | 10.10781592  | 0.67286582   | 0   |
| Hydroxyurea | Standard  | 1             | R     | 0.812366029   | 6.062700517 | 272        | 0.012143494 | 1           | -0.167319879 | -0.170789309 | 0   |
| Hydroxyurea | Standard  | 2.54          | B     | 7.600929389   | 14.42859574 | 315        | 0.025300625 | 0.999973184 | 0.179931569  | 0.024246277  | 0   |
| Hydroxyurea | Standard  | 2.54          | E     | 19.65670375   | 33.89576119 | 315        | 0.068686869 | 0.466471973 | 4.63466573   | 0.308524431  | 0   |
| Hydroxyurea | Standard  | 2.54          | R     | 0.795511217   | 5.899434535 | 280        | 0.009307359 | 1           | -0.184174691 | -0.187993611 | 0   |
| Hydroxyurea | Standard  | 6.45          | B     | 8.081582079   | 14.47149387 | 288        | 0.040509259 | 0.970075961 | 0.660584258  | 0.089015557  | 0   |
| Hydroxyurea | Standard  | 6.45          | E     | 26.33667069   | 40.93427136 | 288        | 0.126683502 | 0.018315821 | 11.31463267  | 0.753202239  | 0   |
| Hydroxyurea | Standard  | 6.45          | R     | 0.633154889   | 5.571964582 | 256        | 0.011008523 | 1           | -0.346531019 | -0.353716447 | 0   |
| Hydroxyurea | Standard  | 16.4          | B     | 8.186104428   | 14.47431631 | 306        | 0.062982769 | 0.588264118 | 0.765106607  | 0.103100233  | 0   |
| Hydroxyurea | Standard  | 16.4          | E     | 22.73894383   | 36.40698492 | 306        | 0.084373143 | 0.233563172 | 7.716905817  | 0.513705651  | 0   |
| Hydroxyurea | Standard  | 16.4          | R     | 1.25006404    | 7.757347716 | 272        | 0.013926025 | 1           | 0.270378132  | 0.275984507  | 0   |
| Hydroxyurea | Standard  | 35            | B     | 7.038341651   | 14.3942711  | 306        | 0.047435136 | 0.886760912 | -0.38265617  | -0.051563978 | 0   |

| Test Agent  | Treatment | Concentration | Phase | Movement.peak | Movement.sd | Movement.n | ks.stat     | ks.pval     | diff         | delta        | sig |
|-------------|-----------|---------------|-------|---------------|-------------|------------|-------------|-------------|--------------|--------------|-----|
| Hydroxyurea | Standard  | 35            | E     | 23.57678451   | 34.78465868 | 306        | 0.108536344 | 0.057395072 | 8.554746495  | 0.569479753  | 0   |
| Hydroxyurea | Standard  | 35            | R     | 0.733459162   | 5.63803774  | 272        | 0.011697861 | 1           | -0.246226746 | -0.251332334 | 0   |
| Hydroxyurea | Standard  | 74.8          | B     | 7.21503374    | 13.58107905 | 288        | 0.026409933 | 0.999956236 | -0.20596408  | -0.02775423  | 0   |
| Hydroxyurea | Standard  | 74.8          | E     | 23.03150407   | 35.46373408 | 288        | 0.121001684 | 0.027641045 | 8.009466056  | 0.533181054  | 0   |
| Hydroxyurea | Standard  | 74.8          | R     | 1.046922419   | 5.929665472 | 256        | 0.012547348 | 1           | 0.067236512  | 0.068630682  | 0   |
| Hydroxyurea | Standard  | 100           | B     | 7.171631325   | 13.84792492 | 288        | 0.036300505 | 0.990541051 | -0.249366496 | -0.033602826 | 0   |
| Hydroxyurea | Standard  | 100           | E     | 27.62202591   | 42.93286232 | 288        | 0.126578283 | 0.018459107 | 12.59998789  | 0.838766875  | 0   |
| Hydroxyurea | Standard  | 100           | R     | 0.464375607   | 4.583847597 | 256        | 0.018821023 | 1           | -0.515310301 | -0.525995421 | 0   |
| MWCNTs      | Chorion   | 0             | B     | 2.765616531   | 7.653992668 | 414        | 0           | 1           | 0            | 0            | 0   |
| MWCNTs      | Chorion   | 0             | E     | 7.930547146   | 16.16340638 | 414        | 0           | 1           | 0            | 0            | 0   |
| MWCNTs      | Chorion   | 0             | R     | 0.215067842   | 2.06506541  | 368        | 0           | 1           | 0            | 0            | 0   |
| MWCNTs      | Chorion   | 10            | B     | 3.020361073   | 8.265081326 | 432        | 0.036332528 | 0.94294535  | 0.254744542  | 0.092111303  | 0   |
| MWCNTs      | Chorion   | 10            | E     | 6.765659125   | 13.92238223 | 432        | 0.051529791 | 0.628463211 | -1.164888021 | -0.146886211 | 0   |
| MWCNTs      | Chorion   | 10            | R     | 0.335580468   | 2.843978775 | 384        | 0.020040761 | 0.999999274 | 0.120512626  | 0.560347029  | 0   |
| MWCNTs      | Chorion   | 23.2          | B     | 2.369247858   | 5.680284547 | 423        | 0.031966286 | 0.983095088 | -0.396368673 | -0.143320185 | 0   |
| MWCNTs      | Chorion   | 23.2          | E     | 5.607320918   | 10.70530552 | 423        | 0.081149142 | 0.12711154  | -2.323226228 | -0.292946525 | 0   |
| MWCNTs      | Chorion   | 23.2          | R     | 0.606657665   | 4.832746784 | 376        | 0.031510176 | 0.992682543 | 0.391589823  | 1.820773482  | 0   |
| MWCNTs      | Chorion   | 50            | B     | 2.330940299   | 5.775777494 | 432        | 0.029388084 | 0.993179176 | -0.434676232 | -0.157171548 | 0   |
| MWCNTs      | Chorion   | 50            | E     | 4.194194808   | 9.026539922 | 432        | 0.10205314  | 0.024469225 | -3.736352338 | -0.471134245 | 0   |
| MWCNTs      | Chorion   | 50            | R     | 0.155809191   | 1.513633944 | 384        | 0.009963768 | 1           | -0.059258651 | -0.27553469  | 0   |
| MWCNTs      | Chorion   | 75            | B     | 2.077946396   | 5.318460231 | 423        | 0.036694419 | 0.940800068 | -0.687670135 | -0.24864985  | 0   |
| MWCNTs      | Chorion   | 75            | E     | 3.495360623   | 8.387882611 | 423        | 0.122160551 | 0.003881669 | -4.435186524 | -0.559253535 | 1   |
| MWCNTs      | Chorion   | 75            | R     | 0.248469329   | 2.264224562 | 376        | 0.005550416 | 1           | 0.033401487  | 0.155306749  | 0   |
| MWCNTs      | Chorion   | 100           | B     | 2.452206085   | 5.862443396 | 432        | 0.062198068 | 0.386764091 | -0.313410447 | -0.113323898 | 0   |
| MWCNTs      | Chorion   | 100           | E     | 3.917250992   | 9.037523334 | 432        | 0.12328905  | 0.003235336 | -4.013296155 | -0.506055393 | 1   |
| MWCNTs      | Chorion   | 100           | R     | 0.308001603   | 2.323676193 | 384        | 0.015172101 | 1           | 0.092933761  | 0.432113702  | 0   |
| MWCNTs      | Standard  | 0             | B     | 5.129120682   | 13.4370001  | 423        | 0           | 1           | 0            | 0            | 0   |
| MWCNTs      | Standard  | 0             | E     | 20.10641454   | 32.86992063 | 423        | 0           | 1           | 0            | 0            | 0   |
| MWCNTs      | Standard  | 0             | R     | 0.342951054   | 4.111029888 | 376        | 0           | 1           | 0            | 0            | 0   |
| MWCNTs      | Standard  | 10            | B     | 6.861691758   | 16.97939437 | 423        | 0.044917258 | 0.786987844 | 1.732571076  | 0.337791053  | 0   |
| MWCNTs      | Standard  | 10            | E     | 28.36725477   | 48.30446835 | 423        | 0.082742317 | 0.110470968 | 8.260840227  | 0.410855959  | 0   |
| MWCNTs      | Standard  | 10            | R     | 0.256549608   | 4.025816303 | 376        | 0.005319149 | 1           | -0.086401446 | -0.25193521  | 0   |
| MWCNTs      | Standard  | 23.2          | B     | 7.082912701   | 17.68724637 | 423        | 0.052009456 | 0.61644461  | 1.953792018  | 0.380921436  | 0   |
| MWCNTs      | Standard  | 23.2          | E     | 28.05209795   | 51.01396775 | 423        | 0.082742317 | 0.110470968 | 7.945683404  | 0.395181517  | 0   |
| MWCNTs      | Standard  | 23.2          | R     | 0.69554113    | 6.791118701 | 376        | 0.010638298 | 1           | 0.352590076  | 1.028106114  | 0   |
| MWCNTs      | Standard  | 50            | B     | 9.054507159   | 25.8410671  | 423        | 0.056737589 | 0.503838252 | 3.925386476  | 0.765313729  | 0   |
| MWCNTs      | Standard  | 50            | E     | 22.67148804   | 47.76416878 | 423        | 0.085106383 | 0.093407418 | 2.565073501  | 0.127574884  | 0   |
| MWCNTs      | Standard  | 50            | R     | 1.007844099   | 12.04550403 | 376        | 0.005319149 | 1           | 0.664893045  | 1.938740344  | 0   |
| MWCNTs      | Standard  | 75            | B     | 5.263391206   | 18.51106607 | 324        | 0.042684529 | 0.891805819 | 0.134270524  | 0.026178078  | 0   |
| MWCNTs      | Standard  | 75            | E     | 12.11520184   | 33.21265233 | 324        | 0.191423693 | 2.89E-06    | -7.991212701 | -0.397445934 | 0   |
| MWCNTs      | Standard  | 75            | R     | 0.119960398   | 2.035795454 | 288        | 0.007166076 | 1           | -0.222990657 | -0.650211317 | 0   |
| MWCNTs      | Standard  | 100           | B     | 4.550715943   | 15.76679132 | 297        | 0.058313633 | 0.59315037  | -0.57840474  | -0.112768791 | 0   |
| MWCNTs      | Standard  | 100           | E     | 15.16357074   | 42.80507536 | 297        | 0.162045992 | 0.000209549 | -4.9428438   | -0.245834173 | 0   |
| MWCNTs      | Standard  | 100           | R     | 0.068803147   | 1.117918825 | 264        | 0.007978723 | 1           | -0.274147907 | -0.799379105 | 0   |
| Napthalene  | Chorion   | 0             | B     | 2.871334887   | 6.148425805 | 315        | 0           | 1           | 0            | 0            | 0   |
| Napthalene  | Chorion   | 0             | E     | 6.631255163   | 12.05587591 | 315        | 0           | 1           | 0            | 0            | 0   |

| Test Agent | Treatment | Concentration | Phase | Movement.peak | Movement.sd | Movement.n | ks.stat     | ks.pval     | diff         | delta        | sig |
|------------|-----------|---------------|-------|---------------|-------------|------------|-------------|-------------|--------------|--------------|-----|
| Napthalene | Chorion   | 0             | R     | 0.26134679    | 2.265063009 | 280        | 0           | 1           | 0            | 0            | 0   |
| Napthalene | Chorion   | 1             | B     | 3.12892669    | 6.557886624 | 315        | 0.031746032 | 0.997349747 | 0.257591803  | 0.089711515  | 0   |
| Napthalene | Chorion   | 1             | E     | 6.108148828   | 11.73677407 | 315        | 0.053968254 | 0.748621806 | -0.523106335 | -0.078884965 | 0   |
| Napthalene | Chorion   | 1             | R     | 0.399770794   | 3.735363302 | 280        | 0.007142857 | 1           | 0.138424004  | 0.529656417  | 0   |
| Napthalene | Chorion   | 2.54          | B     | 3.060632514   | 6.150371202 | 324        | 0.038977072 | 0.968486822 | 0.189297627  | 0.065926698  | 0   |
| Napthalene | Chorion   | 2.54          | E     | 7.325022348   | 13.79928525 | 324        | 0.04356261  | 0.922270402 | 0.693767185  | 0.104620795  | 0   |
| Napthalene | Chorion   | 2.54          | R     | 0.240825174   | 2.066035073 | 288        | 0.00406746  | 1           | -0.020521615 | -0.078522547 | 0   |
| Napthalene | Chorion   | 6.45          | B     | 3.342884755   | 6.827157964 | 324        | 0.050793651 | 0.804398499 | 0.471549868  | 0.164226705  | 0   |
| Napthalene | Chorion   | 6.45          | E     | 7.284365483   | 12.79601412 | 324        | 0.044003527 | 0.916543447 | 0.65311032   | 0.098489698  | 0   |
| Napthalene | Chorion   | 6.45          | R     | 0.724057944   | 3.669748208 | 288        | 0.034325397 | 0.996159877 | 0.462711155  | 1.770487236  | 0   |
| Napthalene | Chorion   | 16.4          | B     | 3.276440511   | 6.582364998 | 324        | 0.03994709  | 0.960757971 | 0.405105624  | 0.141086164  | 0   |
| Napthalene | Chorion   | 16.4          | E     | 5.488307609   | 11.09753743 | 324        | 0.054585538 | 0.728058466 | -1.142947554 | -0.17235765  | 0   |
| Napthalene | Chorion   | 16.4          | R     | 0.681333225   | 3.487979461 | 288        | 0.030853175 | 0.999260131 | 0.419986436  | 1.607008208  | 0   |
| Napthalene | Chorion   | 35            | B     | 3.02392759    | 6.675822998 | 324        | 0.031746032 | 0.997068217 | 0.152592703  | 0.053143471  | 0   |
| Napthalene | Chorion   | 35            | E     | 6.145378103   | 10.8148172  | 324        | 0.034126984 | 0.992344456 | -0.48587706  | -0.073270753 | 0   |
| Napthalene | Chorion   | 35            | R     | 0.156280004   | 1.556630596 | 288        | 0.007539683 | 1           | -0.105066785 | -0.40202057  | 0   |
| Napthalene | Chorion   | 74.8          | B     | 2.831629136   | 5.853156003 | 324        | 0.025749559 | 0.999932821 | -0.039705751 | -0.013828325 | 0   |
| Napthalene | Chorion   | 74.8          | E     | 7.267754188   | 13.18242629 | 324        | 0.049559083 | 0.827626187 | 0.636499025  | 0.095984698  | 0   |
| Napthalene | Chorion   | 74.8          | R     | 0.413456612   | 2.467957655 | 288        | 0.016964286 | 1           | 0.152109823  | 0.582022924  | 0   |
| Napthalene | Chorion   | 100           | B     | 3.032166593   | 6.597306261 | 324        | 0.030864198 | 0.998066056 | 0.160831706  | 0.056012869  | 0   |
| Napthalene | Chorion   | 100           | E     | 7.141632672   | 12.84608319 | 324        | 0.039417989 | 0.965107738 | 0.510377509  | 0.076965446  | 0   |
| Napthalene | Chorion   | 100           | R     | 0.341947414   | 2.69286413  | 288        | 0.010019841 | 1           | 0.080600624  | 0.308404876  | 0   |
| Napthalene | Standard  | 0             | B     | 6.118264412   | 12.74648715 | 270        | 0           | 1           | 0            | 0            | 0   |
| Napthalene | Standard  | 0             | E     | 26.35207578   | 37.94672423 | 270        | 0           | 1           | 0            | 0            | 0   |
| Napthalene | Standard  | 0             | R     | 0.618218205   | 4.277602693 | 240        | 0           | 1           | 0            | 0            | 0   |
| Napthalene | Standard  | 1             | B     | 6.488393911   | 14.01594893 | 270        | 0.022222222 | 0.999999911 | 0.370129499  | 0.060495833  | 0   |
| Napthalene | Standard  | 1             | E     | 22.58793138   | 34.52055838 | 270        | 0.088888889 | 0.236490071 | -3.764144403 | -0.142840527 | 0   |
| Napthalene | Standard  | 1             | R     | 0.625180872   | 4.468344772 | 240        | 0.008333333 | 1           | 0.006962667  | 0.011262474  | 0   |
| Napthalene | Standard  | 2.54          | B     | 5.247079663   | 13.62153802 | 261        | 0.068965517 | 0.553137577 | -0.871184749 | -0.14239083  | 0   |
| Napthalene | Standard  | 2.54          | E     | 23.90254164   | 36.05151607 | 261        | 0.07394636  | 0.462488307 | -2.449534137 | -0.092954125 | 0   |
| Napthalene | Standard  | 2.54          | R     | 0.664417862   | 6.165235068 | 232        | 0.012212644 | 1           | 0.046199657  | 0.074730341  | 0   |
| Napthalene | Standard  | 6.45          | B     | 5.689108754   | 12.17331873 | 279        | 0.030107527 | 0.999650064 | -0.429155657 | -0.070143366 | 0   |
| Napthalene | Standard  | 6.45          | E     | 27.13109227   | 36.45208787 | 279        | 0.041457587 | 0.972401732 | 0.779016491  | 0.029561864  | 0   |
| Napthalene | Standard  | 6.45          | R     | 0.999576279   | 5.809236576 | 248        | 0.027419355 | 0.999988118 | 0.381358074  | 0.616866457  | 0   |
| Napthalene | Standard  | 16.4          | B     | 6.614617324   | 14.21305553 | 252        | 0.028835979 | 0.999913274 | 0.496352912  | 0.081126424  | 0   |
| Napthalene | Standard  | 16.4          | E     | 28.48875597   | 42.73914448 | 252        | 0.05026455  | 0.896884959 | 2.136680186  | 0.081082045  | 0   |
| Napthalene | Standard  | 16.4          | R     | 0.634474897   | 5.298696235 | 224        | 0.00922619  | 1           | 0.016256692  | 0.026296043  | 0   |
| Napthalene | Standard  | 35            | B     | 6.649959309   | 13.92764591 | 279        | 0.028793309 | 0.999855069 | 0.531694897  | 0.086902896  | 0   |
| Napthalene | Standard  | 35            | E     | 30.84623031   | 46.0198322  | 279        | 0.062724014 | 0.652897511 | 4.494154527  | 0.170542714  | 0   |
| Napthalene | Standard  | 35            | R     | 0.550497706   | 4.447570304 | 248        | 0.008736559 | 1           | -0.067720499 | -0.109541418 | 0   |
| Napthalene | Standard  | 74.8          | B     | 7.00515198    | 14.50773762 | 306        | 0.034204793 | 0.996073762 | 0.886887569  | 0.144957378  | 0   |
| Napthalene | Standard  | 74.8          | E     | 27.32850191   | 41.15637658 | 306        | 0.077777778 | 0.350727904 | 0.976426129  | 0.037053101  | 0   |
| Napthalene | Standard  | 74.8          | R     | 0.520035457   | 3.61486407  | 272        | 0.013480392 | 1           | -0.098182748 | -0.158815685 | 0   |
| Napthalene | Standard  | 100           | B     | 7.385121021   | 14.09154085 | 297        | 0.046127946 | 0.92424492  | 1.266856609  | 0.207061435  | 0   |
| Napthalene | Standard  | 100           | E     | 17.05283384   | 31.55560497 | 297        | 0.140740741 | 0.007374887 | -9.299241941 | -0.352884608 | 0   |
| Napthalene | Standard  | 100           | R     | 0.983714128   | 5.734776169 | 264        | 0.013257576 | 1           | 0.365495923  | 0.591208606  | 0   |

| Test Agent | Treatment | Concentration | Phase | Movement.peak | Movement.sd | Movement.n | ks.stat     | ks.pval     | diff         | delta        | sig |
|------------|-----------|---------------|-------|---------------|-------------|------------|-------------|-------------|--------------|--------------|-----|
| Permethrin | Chorion   | 0             | B     | 1.513605017   | 5.412050155 | 324        | 0           | 1           | 0            | 0            | 0   |
| Permethrin | Chorion   | 0             | E     | 4.036525437   | 9.962544628 | 324        | 0           | 1           | 0            | 0            | 0   |
| Permethrin | Chorion   | 0             | R     | 0.344811031   | 2.735102199 | 288        | 0           | 1           | 0            | 0            | 0   |
| Permethrin | Chorion   | 1             | B     | 1.730737133   | 5.532049852 | 315        | 0.038095238 | 0.974589093 | 0.217132116  | 0.143453618  | 0   |
| Permethrin | Chorion   | 1             | E     | 4.771757018   | 10.53350835 | 315        | 0.060758377 | 0.597196894 | 0.735231581  | 0.182144667  | 0   |
| Permethrin | Chorion   | 1             | R     | 0.911381068   | 5.622840042 | 280        | 0.025793651 | 0.999982659 | 0.566570037  | 1.643131997  | 0   |
| Permethrin | Chorion   | 2.54          | B     | 2.138524895   | 5.837370601 | 324        | 0.067901235 | 0.443946011 | 0.624919878  | 0.41286853   | 0   |
| Permethrin | Chorion   | 2.54          | E     | 4.410472022   | 10.26977344 | 324        | 0.052469136 | 0.763912024 | 0.373946584  | 0.092640711  | 0   |
| Permethrin | Chorion   | 2.54          | R     | 0.531081144   | 3.920650738 | 288        | 0.010416667 | 1           | 0.186270113  | 0.540209263  | 0   |
| Permethrin | Chorion   | 5             | B     | 2.664241827   | 7.911682004 | 315        | 0.069753086 | 0.418722242 | 1.150636809  | 0.760196218  | 0   |
| Permethrin | Chorion   | 5             | E     | 3.99415816    | 9.632278364 | 315        | 0.034567901 | 0.9910585   | -0.042367277 | -0.010495977 | 0   |
| Permethrin | Chorion   | 5             | R     | 1.530335364   | 6.767851775 | 280        | 0.057738095 | 0.731173045 | 1.185524333  | 3.438185635  | 0   |
| Permethrin | Chorion   | 8             | B     | 1.696911187   | 5.49883506  | 315        | 0.028835979 | 0.999364433 | 0.18330617   | 0.121105683  | 0   |
| Permethrin | Chorion   | 8             | E     | 4.1050071     | 9.66234369  | 315        | 0.051058201 | 0.799296433 | 0.068481662  | 0.016965498  | 0   |
| Permethrin | Chorion   | 8             | R     | 1.166837365   | 6.273096395 | 280        | 0.039781746 | 0.978189912 | 0.822026334  | 2.383990826  | 0   |
| Permethrin | Chorion   | 12            | B     | 1.208244968   | 4.67955911  | 324        | 0.021604938 | 0.999999251 | -0.305360049 | -0.20174355  | 0   |
| Permethrin | Chorion   | 12            | E     | 3.878855155   | 10.25682294 | 324        | 0.049382716 | 0.824393461 | -0.157670282 | -0.039060891 | 0   |
| Permethrin | Chorion   | 12            | R     | 1.447663523   | 6.811647045 | 288        | 0.0625      | 0.627167051 | 1.102852492  | 3.198425785  | 0   |
| Permethrin | Chorion   | 16.4          | B     | 2.533235209   | 7.449899825 | 324        | 0.043209877 | 0.922844972 | 1.019630192  | 0.673643507  | 0   |
| Permethrin | Chorion   | 16.4          | E     | 3.875238582   | 11.31534525 | 324        | 0.052469136 | 0.763912024 | -0.161286855 | -0.039956853 | 0   |
| Permethrin | Chorion   | 16.4          | R     | 1.464315855   | 6.634470949 | 288        | 0.079861111 | 0.317377205 | 1.119504824  | 3.246719867  | 0   |
| Permethrin | Chorion   | 35            | B     | 2.159690016   | 6.930719622 | 324        | 0.027777778 | 0.999633292 | 0.646084998  | 0.426851782  | 0   |
| Permethrin | Chorion   | 35            | E     | 3.286018611   | 9.144490641 | 324        | 0.064814815 | 0.504120853 | -0.750506826 | -0.185928923 | 0   |
| Permethrin | Chorion   | 35            | R     | 1.499505465   | 5.605226943 | 288        | 0.083333333 | 0.269999672 | 1.154694434  | 3.348774636  | 0   |
| Permethrin | Standard  | 0             | B     | 3.981978441   | 12.17282364 | 288        | 0           | 1           | 0            | 0            | 0   |
| Permethrin | Standard  | 0             | E     | 26.59565513   | 43.24530967 | 288        | 0           | 1           | 0            | 0            | 0   |
| Permethrin | Standard  | 0             | R     | 0.565168611   | 4.708985416 | 256        | 0           | 1           | 0            | 0            | 0   |
| Permethrin | Standard  | 1             | B     | 4.682194658   | 12.36950197 | 270        | 0.064814815 | 0.601765435 | 0.700216217  | 0.17584631   | 0   |
| Permethrin | Standard  | 1             | E     | 28.66480082   | 41.99796858 | 270        | 0.050925926 | 0.86272487  | 2.069145689  | 0.07780014   | 0   |
| Permethrin | Standard  | 1             | R     | 0.280400209   | 3.115286534 | 240        | 0.011458333 | 1           | -0.284768402 | -0.503864505 | 0   |
| Permethrin | Standard  | 2.54          | B     | 4.742356326   | 12.34494934 | 252        | 0.056547619 | 0.783347385 | 0.760377885  | 0.190954797  | 0   |
| Permethrin | Standard  | 2.54          | E     | 27.00789505   | 43.14962364 | 252        | 0.038690476 | 0.987860766 | 0.412239924  | 0.015500273  | 0   |
| Permethrin | Standard  | 2.54          | R     | 1.703365072   | 9.321852768 | 224        | 0.0390625   | 0.99324665  | 1.138196461  | 2.013906006  | 0   |
| Permethrin | Standard  | 5             | B     | 6.163034656   | 14.3104551  | 270        | 0.124537037 | 0.026529564 | 2.181056216  | 0.547731799  | 0   |
| Permethrin | Standard  | 5             | E     | 26.32724001   | 45.08177057 | 270        | 0.063888889 | 0.620101412 | -0.26841512  | -0.010092443 | 0   |
| Permethrin | Standard  | 5             | R     | 1.417914369   | 7.628081814 | 240        | 0.0390625   | 0.9915635   | 0.852745757  | 1.508834249  | 0   |
| Permethrin | Standard  | 8             | B     | 5.815972229   | 13.05666155 | 270        | 0.109027778 | 0.072807325 | 1.833993788  | 0.46057351   | 0   |
| Permethrin | Standard  | 8             | E     | 28.53290615   | 43.1152614  | 270        | 0.049074074 | 0.890432699 | 1.937251025  | 0.072840884  | 0   |
| Permethrin | Standard  | 8             | R     | 2.483633138   | 11.3924747  | 240        | 0.047395833 | 0.94358924  | 1.918464527  | 3.394499426  | 0   |
| Permethrin | Standard  | 12            | B     | 6.86771016    | 17.2678292  | 306        | 0.089869281 | 0.181932108 | 2.885731719  | 0.724697977  | 0   |
| Permethrin | Standard  | 12            | E     | 22.70057426   | 39.52810757 | 306        | 0.062908497 | 0.599884719 | -3.895080871 | -0.146455534 | 0   |
| Permethrin | Standard  | 12            | R     | 2.204685785   | 10.88839188 | 272        | 0.04296875  | 0.967982405 | 1.639517173  | 2.900934589  | 0   |
| Permethrin | Standard  | 16.4          | B     | 5.302916749   | 13.95675689 | 279        | 0.058243728 | 0.722266211 | 1.320938309  | 0.331729146  | 0   |
| Permethrin | Standard  | 16.4          | E     | 23.51823742   | 42.93596019 | 279        | 0.103494624 | 0.096057727 | -3.077417706 | -0.115711295 | 0   |
| Permethrin | Standard  | 16.4          | R     | 3.567603232   | 14.2953962  | 248        | 0.073336694 | 0.507058943 | 3.002434621  | 5.312458195  | 0   |
| Permethrin | Standard  | 35            | B     | 4.425216226   | 12.79889351 | 279        | 0.036290323 | 0.992186965 | 0.443237785  | 0.111310945  | 0   |



| Test Agent | Treatment | Concentration | Phase | Movement.peak | Movement.sd | Movement.n | ks.stat     | ks.pval     | diff         | delta        | sig |
|------------|-----------|---------------|-------|---------------|-------------|------------|-------------|-------------|--------------|--------------|-----|
| Permethrin | Standard  | 35            | E     | 18.81541363   | 37.5244494  | 279        | 0.109879032 | 0.065295339 | -7.780241498 | -0.292538065 | 0   |
| Permethrin | Standard  | 35            | R     | 3.310511795   | 13.86375947 | 248        | 0.065146169 | 0.658910254 | 2.745343184  | 4.857564855  | 0   |
| Pyrene     | Chorion   | 0             | B     | 1.795454861   | 5.501947052 | 324        | 0           | 1           | 0            | 0            | 0   |
| Pyrene     | Chorion   | 0             | E     | 6.042363714   | 12.13017618 | 324        | 0           | 1           | 0            | 0            | 0   |
| Pyrene     | Chorion   | 0             | R     | 0.096224513   | 1.339747527 | 288        | 0           | 1           | 0            | 0            | 0   |
| Pyrene     | Chorion   | 1             | B     | 1.800595213   | 5.437052586 | 315        | 0.024074074 | 0.999986581 | 0.005140352  | 0.00286298   | 0   |
| Pyrene     | Chorion   | 1             | E     | 4.79083989    | 11.26059774 | 315        | 0.05952381  | 0.623363362 | -1.251523824 | -0.207124874 | 0   |
| Pyrene     | Chorion   | 1             | R     | 0.312190063   | 2.490359344 | 280        | 0.01468254  | 1           | 0.215965549  | 2.244392231  | 0   |
| Pyrene     | Chorion   | 5             | B     | 2.926672858   | 7.146281455 | 324        | 0.092592593 | 0.124323157 | 1.131217997  | 0.630045356  | 0   |
| Pyrene     | Chorion   | 5             | E     | 4.609669764   | 10.14556626 | 324        | 0.070987654 | 0.387885061 | -1.43269395  | -0.237108194 | 0   |
| Pyrene     | Chorion   | 5             | R     | 0.208725246   | 2.008892096 | 288        | 0.013888889 | 1           | 0.112500733  | 1.169148375  | 0   |
| Pyrene     | Chorion   | 16.5          | B     | 2.664515423   | 6.248550629 | 324        | 0.12654321  | 0.01116329  | 0.869060562  | 0.484033646  | 0   |
| Pyrene     | Chorion   | 16.5          | E     | 3.21207292    | 7.402067669 | 324        | 0.108024691 | 0.045605413 | -2.830290794 | -0.468407883 | 0   |
| Pyrene     | Chorion   | 16.5          | R     | 0.816062783   | 3.988543993 | 288        | 0.069444444 | 0.490980372 | 0.71983827   | 7.480820093  | 0   |
| Pyrene     | Chorion   | 30            | B     | 2.491306641   | 5.832888513 | 324        | 0.098765432 | 0.084803124 | 0.695851779  | 0.387562948  | 0   |
| Pyrene     | Chorion   | 30            | E     | 2.907919122   | 6.689823327 | 324        | 0.108024691 | 0.045605413 | -3.134444592 | -0.518744773 | 0   |
| Pyrene     | Chorion   | 30            | R     | 0.708459954   | 3.078336681 | 288        | 0.079861111 | 0.317377205 | 0.612235441  | 6.362572506  | 0   |
| Pyrene     | Chorion   | 50            | B     | 2.145088787   | 5.531225675 | 324        | 0.083333333 | 0.210551633 | 0.349633926  | 0.194732785  | 0   |
| Pyrene     | Chorion   | 50            | E     | 2.781930877   | 6.672909748 | 324        | 0.111111111 | 0.036631053 | -3.260432837 | -0.539595594 | 0   |
| Pyrene     | Chorion   | 50            | R     | 1.10127001    | 4.412560427 | 288        | 0.097222222 | 0.131419728 | 1.005045497  | 10.44479692  | 0   |
| Pyrene     | Chorion   | 65            | B     | 2.091324889   | 4.900183608 | 315        | 0.095943563 | 0.105666448 | 0.295870027  | 0.164788341  | 0   |
| Pyrene     | Chorion   | 65            | E     | 3.033234177   | 6.570228515 | 315        | 0.119135802 | 0.021477993 | -3.009129537 | -0.498005363 | 0   |
| Pyrene     | Chorion   | 65            | R     | 0.738854659   | 3.258229322 | 280        | 0.08968254  | 0.203587694 | 0.642630146  | 6.678445296  | 0   |
| Pyrene     | Chorion   | 100           | B     | 1.888623909   | 4.612374844 | 324        | 0.111111111 | 0.036631053 | 0.093169047  | 0.051891612  | 0   |
| Pyrene     | Chorion   | 100           | E     | 2.58976634    | 5.98406805  | 324        | 0.12962963  | 0.008640478 | -3.452597374 | -0.571398469 | 1   |
| Pyrene     | Chorion   | 100           | R     | 0.476375556   | 2.296321479 | 288        | 0.083333333 | 0.269999672 | 0.380151043  | 3.950667366  | 0   |
| Pyrene     | Standard  | 0             | B     | 6.817061581   | 14.88713194 | 315        | 0           | 1           | 0            | 0            | 0   |
| Pyrene     | Standard  | 0             | E     | 26.69346483   | 43.53260302 | 315        | 0           | 1           | 0            | 0            | 0   |
| Pyrene     | Standard  | 0             | R     | 1.195668819   | 7.165270118 | 280        | 0           | 1           | 0            | 0            | 0   |
| Pyrene     | Standard  | 1             | B     | 6.199162825   | 15.57272893 | 324        | 0.045679012 | 0.892849947 | -0.617898756 | -0.090640043 | 0   |
| Pyrene     | Standard  | 1             | E     | 28.947843     | 45.10049932 | 324        | 0.044091711 | 0.915372032 | 2.254378166  | 0.08445431   | 0   |
| Pyrene     | Standard  | 1             | R     | 1.327703364   | 8.502607141 | 288        | 0.015079365 | 1           | 0.132034545  | 0.110427354  | 0   |
| Pyrene     | Standard  | 5             | B     | 7.339960382   | 15.26551542 | 315        | 0.034920635 | 0.990716312 | 0.522898801  | 0.076704427  | 0   |
| Pyrene     | Standard  | 5             | E     | 17.59837998   | 29.62113266 | 315        | 0.085714286 | 0.19748266  | -9.095084847 | -0.340723278 | 0   |
| Pyrene     | Standard  | 5             | R     | 0.627170199   | 4.788795588 | 280        | 0.017857143 | 1           | -0.568498621 | -0.475464954 | 0   |
| Pyrene     | Standard  | 16.5          | B     | 7.886043958   | 15.1053472  | 324        | 0.092328042 | 0.13131409  | 1.068982378  | 0.156809846  | 0   |
| Pyrene     | Standard  | 16.5          | E     | 8.314579151   | 15.20181748 | 324        | 0.210846561 | 1.36E-06    | -18.37888568 | -0.688516301 | 1   |
| Pyrene     | Standard  | 16.5          | R     | 1.445478356   | 7.382318444 | 288        | 0.023214286 | 0.9999991   | 0.249809537  | 0.208928704  | 0   |
| Pyrene     | Standard  | 30            | B     | 7.133280653   | 13.48575118 | 315        | 0.095238095 | 0.114843478 | 0.316219072  | 0.046386419  | 0   |
| Pyrene     | Standard  | 30            | E     | 6.90448631    | 14.06391401 | 315        | 0.219047619 | 5.46E-07    | -19.78897852 | -0.741341697 | 1   |
| Pyrene     | Standard  | 30            | R     | 2.148902724   | 9.71001492  | 280        | 0.028571429 | 0.999847967 | 0.953233904  | 0.797239076  | 0   |
| Pyrene     | Standard  | 50            | B     | 6.786931911   | 12.30052908 | 306        | 0.098039216 | 0.101187039 | -0.03012967  | -0.004419744 | 0   |
| Pyrene     | Standard  | 50            | E     | 6.37708852    | 13.14305127 | 306        | 0.236321195 | 5.91E-08    | -20.31637631 | -0.761099259 | 1   |
| Pyrene     | Standard  | 50            | R     | 2.40398751    | 7.88942321  | 272        | 0.078151261 | 0.368403171 | 1.20831869   | 1.010579745  | 0   |
| Pyrene     | Standard  | 65            | B     | 5.790619369   | 12.09688596 | 315        | 0.06984127  | 0.425981642 | -1.026442212 | -0.150569597 | 0   |
| Pyrene     | Standard  | 65            | E     | 6.003499059   | 12.47512073 | 315        | 0.241269841 | 2.18E-08    | -20.68996577 | -0.7750948   | 1   |

| Test Agent | Treatment | Concentration | Phase | Movement.peak | Movement.sd | Movement.n | ks.stat     | ks.pval     | diff         | delta        | sig |
|------------|-----------|---------------|-------|---------------|-------------|------------|-------------|-------------|--------------|--------------|-----|
| Pyrene     | Standard  | 65            | R     | 1.454613031   | 5.942695346 | 280        | 0.032142857 | 0.998697677 | 0.258944212  | 0.216568508  | 0   |
| Pyrene     | Standard  | 100           | B     | 4.403112699   | 9.877537322 | 306        | 0.085434174 | 0.207249321 | -2.413948882 | -0.354104016 | 0   |
| Pyrene     | Standard  | 100           | E     | 4.363469201   | 10.29318276 | 306        | 0.278711485 | 6.73E-11    | -22.32999563 | -0.836534177 | 1   |
| Pyrene     | Standard  | 100           | R     | 1.233149085   | 5.747329089 | 272        | 0.026680672 | 0.99997196  | 0.037480265  | 0.031346695  | 0   |
| Retene     | Chorion   | 0             | B     | 2.532104802   | 6.899548366 | 315        | 0           | 1           | 0            | 0            | 0   |
| Retene     | Chorion   | 0             | E     | 5.799644472   | 11.596248   | 315        | 0           | 1           | 0            | 0            | 0   |
| Retene     | Chorion   | 0             | R     | 0.233134969   | 1.823314661 | 280        | 0           | 1           | 0            | 0            | 0   |
| Retene     | Chorion   | 1             | B     | 2.781126796   | 7.292364562 | 324        | 0.030070547 | 0.998713475 | 0.249021994  | 0.098345848  | 0   |
| Retene     | Chorion   | 1             | E     | 6.215236928   | 12.70760248 | 324        | 0.029717813 | 0.998938421 | 0.415592456  | 0.071658264  | 0   |
| Retene     | Chorion   | 1             | R     | 0.115288623   | 1.578525163 | 288        | 0.014484127 | 1           | -0.117846345 | -0.505485496 | 0   |
| Retene     | Chorion   | 5             | B     | 3.032367727   | 8.170703023 | 324        | 0.026719577 | 0.999851456 | 0.500262924  | 0.197568017  | 0   |
| Retene     | Chorion   | 5             | E     | 6.820598913   | 12.83890317 | 324        | 0.056084656 | 0.696546508 | 1.020954441  | 0.176037418  | 0   |
| Retene     | Chorion   | 5             | R     | 0.63220375    | 4.174253245 | 288        | 0.017261905 | 1           | 0.399068781  | 1.711749995  | 0   |
| Retene     | Chorion   | 20            | B     | 3.121449831   | 7.27842646  | 324        | 0.063756614 | 0.534809345 | 0.589345029  | 0.232749066  | 0   |
| Retene     | Chorion   | 20            | E     | 5.956830663   | 12.07894186 | 324        | 0.029717813 | 0.998938421 | 0.157186191  | 0.027102729  | 0   |
| Retene     | Chorion   | 20            | R     | 0.46175696    | 2.839182787 | 288        | 0.020734127 | 0.999999983 | 0.228621992  | 0.980642213  | 0   |
| Retene     | Chorion   | 30            | B     | 2.866191388   | 8.185021731 | 324        | 0.020546737 | 0.999999891 | 0.334086585  | 0.131940268  | 0   |
| Retene     | Chorion   | 30            | E     | 5.611014907   | 12.20918857 | 324        | 0.031128748 | 0.997800426 | -0.188629565 | -0.032524332 | 0   |
| Retene     | Chorion   | 30            | R     | 0.273301914   | 2.505093921 | 288        | 0.009821429 | 1           | 0.040166946  | 0.172290524  | 0   |
| Retene     | Chorion   | 45            | B     | 2.814683987   | 6.458077659 | 324        | 0.057848325 | 0.65905591  | 0.282579184  | 0.111598534  | 0   |
| Retene     | Chorion   | 45            | E     | 5.643768249   | 11.19376047 | 324        | 0.028218695 | 0.999569347 | -0.155876223 | -0.026876858 | 0   |
| Retene     | Chorion   | 45            | R     | 0.679826096   | 3.373366064 | 288        | 0.037599206 | 0.988024825 | 0.446691127  | 1.91601942   | 0   |
| Retene     | Chorion   | 65            | B     | 2.790235461   | 6.893397203 | 324        | 0.05696649  | 0.677834504 | 0.258130659  | 0.101943118  | 0   |
| Retene     | Chorion   | 65            | E     | 5.997352823   | 12.75480947 | 324        | 0.028659612 | 0.99942981  | 0.197708351  | 0.034089736  | 0   |
| Retene     | Chorion   | 65            | R     | 0.416093923   | 3.104190081 | 288        | 0.016765873 | 1           | 0.182958954  | 0.78477697   | 0   |
| Retene     | Chorion   | 100           | B     | 2.663845385   | 6.629556556 | 324        | 0.041534392 | 0.945745673 | 0.131740582  | 0.052028092  | 0   |
| Retene     | Chorion   | 100           | E     | 5.165800788   | 10.37004089 | 324        | 0.028395062 | 0.999517396 | -0.633843684 | -0.109290093 | 0   |
| Retene     | Chorion   | 100           | R     | 0.583224957   | 4.00938456  | 288        | 0.017261905 | 1           | 0.350089989  | 1.501662281  | 0   |
| Retene     | Standard  | 0             | B     | 4.393852808   | 12.26609985 | 288        | 0           | 1           | 0            | 0            | 0   |
| Retene     | Standard  | 0             | E     | 20.04974683   | 36.30153242 | 288        | 0           | 1           | 0            | 0            | 0   |
| Retene     | Standard  | 0             | R     | 0.047471814   | 0.759549023 | 256        | 0           | 1           | 0            | 0            | 0   |
| Retene     | Standard  | 1             | B     | 5.463926667   | 13.54054663 | 216        | 0.045138889 | 0.962986917 | 1.070073859  | 0.24353885   | 0   |
| Retene     | Standard  | 1             | E     | 23.48331481   | 42.36033778 | 216        | 0.072916667 | 0.527812621 | 3.433567978  | 0.171252436  | 0   |
| Retene     | Standard  | 1             | R     | 0.002373589   | 0.023433324 | 192        | 0.006510417 | 1           | -0.045098225 | -0.950000039 | 0   |
| Retene     | Standard  | 5             | B     | 4.971306422   | 13.14688453 | 270        | 0.036805556 | 0.991626622 | 0.577453614  | 0.131423067  | 0   |
| Retene     | Standard  | 5             | E     | 17.45643664   | 36.02403205 | 270        | 0.083101852 | 0.290944013 | -2.593310191 | -0.129343787 | 0   |
| Retene     | Standard  | 5             | R     | 1.88413259    | 12.08899558 | 240        | 0.041927083 | 0.9813987   | 1.836660776  | 38.68950063  | 0   |
| Retene     | Standard  | 20            | B     | 4.867667155   | 12.83402959 | 288        | 0.027777778 | 0.999886732 | 0.473814347  | 0.107835735  | 0   |
| Retene     | Standard  | 20            | E     | 10.63465993   | 23.27327232 | 288        | 0.128472222 | 0.017243402 | -9.415086901 | -0.469586324 | 0   |
| Retene     | Standard  | 20            | R     | 8.48E-05      | 0.001356336 | 256        | 0.00390625  | 1           | -0.047387043 | -0.998214288 | 0   |
| Retene     | Standard  | 30            | B     | 4.095614435   | 9.980906751 | 270        | 0.044444444 | 0.945950808 | -0.298238372 | -0.067876277 | 0   |
| Retene     | Standard  | 30            | E     | 6.807242647   | 15.72111411 | 270        | 0.15        | 0.003780797 | -13.24250418 | -0.660482364 | 1   |
| Retene     | Standard  | 30            | R     | 0             | 0           | 240        | 0.00390625  | 1           | -0.047471814 | -1           | 0   |
| Retene     | Standard  | 45            | B     | 3.248120313   | 9.363279752 | 297        | 0.053135522 | 0.803510777 | -1.145732495 | -0.260758051 | 0   |
| Retene     | Standard  | 45            | E     | 8.970711312   | 23.67013311 | 297        | 0.179292929 | 0.000165371 | -11.07903552 | -0.552577327 | 1   |
| Retene     | Standard  | 45            | R     | 8.22E-05      | 0.001335627 | 264        | 0.00390625  | 1           | -0.047389612 | -0.9982684   | 0   |

| Test Agent | Treatment | Concentration | Phase | Movement.peak | Movement.sd | Movement.n | ks.stat     | ks.pval     | diff         | delta        | sig |
|------------|-----------|---------------|-------|---------------|-------------|------------|-------------|-------------|--------------|--------------|-----|
| Retene     | Standard  | 65            | B     | 2.03406005    | 7.014705706 | 207        | 0.070048309 | 0.595740327 | -2.359792758 | -0.537066866 | 0   |
| Retene     | Standard  | 65            | E     | 2.567682773   | 10.0701865  | 207        | 0.272795894 | 3.28E-08    | -17.48206405 | -0.871934404 | 1   |
| Retene     | Standard  | 65            | R     | 0.467287681   | 3.19965479  | 184        | 0.02173913  | 1           | 0.419815867  | 8.84347642   | 0   |
| Retene     | Standard  | 100           | B     | 1.57467679    | 5.125940106 | 180        | 0.081944444 | 0.446619876 | -2.819176018 | -0.64161822  | 0   |
| Retene     | Standard  | 100           | E     | 1.194299861   | 7.627606909 | 180        | 0.309722222 | 1.18E-09    | -18.85544697 | -0.94043317  | 1   |
| Retene     | Standard  | 100           | R     | 0.1357694     | 1.513866324 | 160        | 0.00859375  | 1           | 0.088297586  | 1.860000262  | 0   |



# Chlorpyrifos

## Chorion on

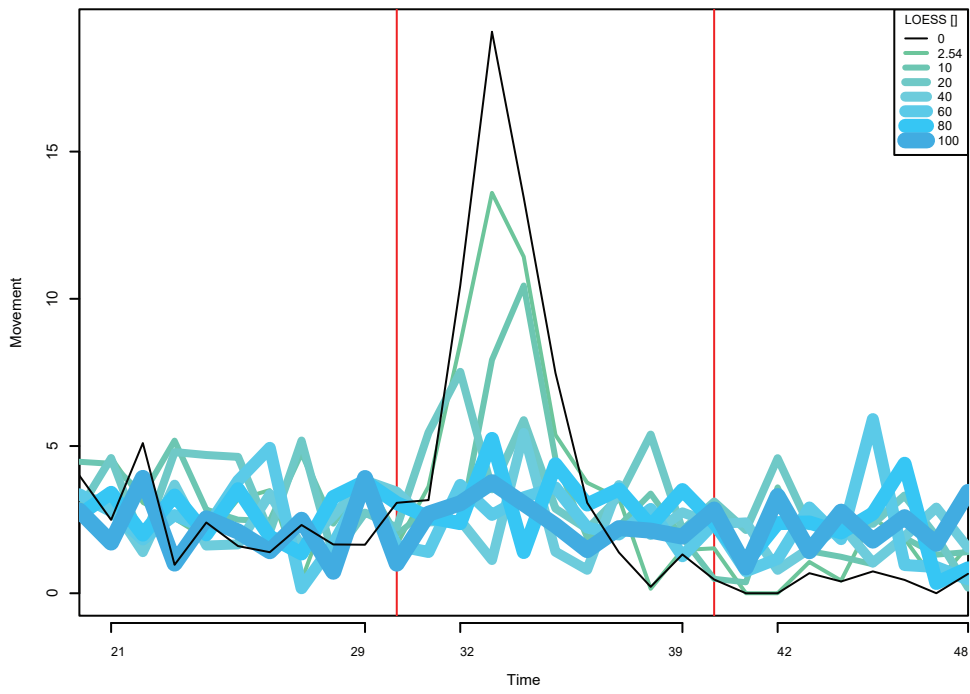

## Standard

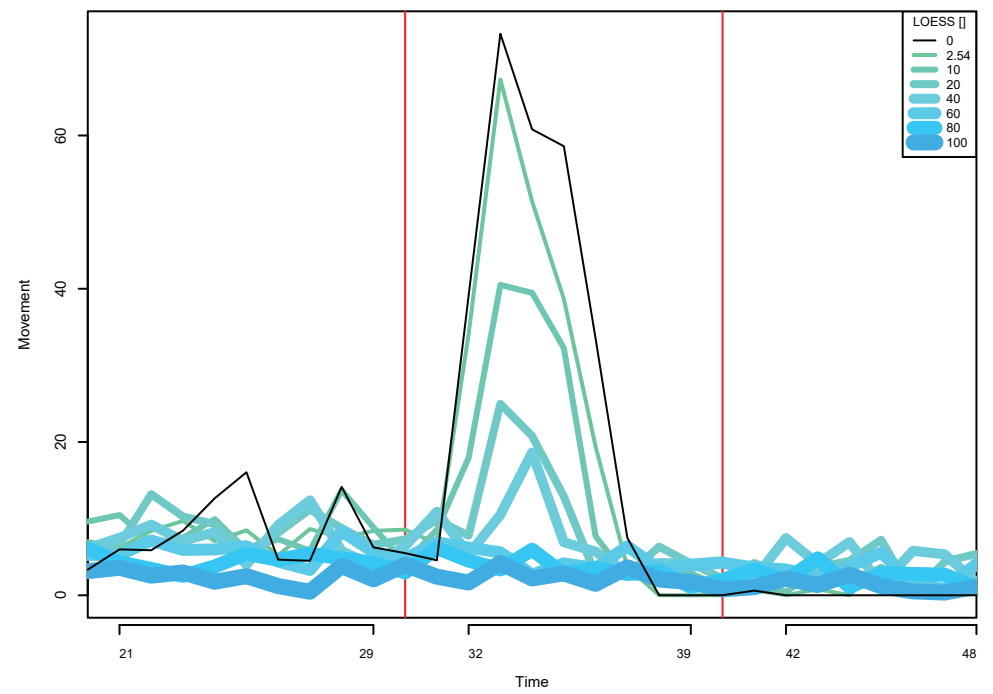

# Estradiol

## Chorion on

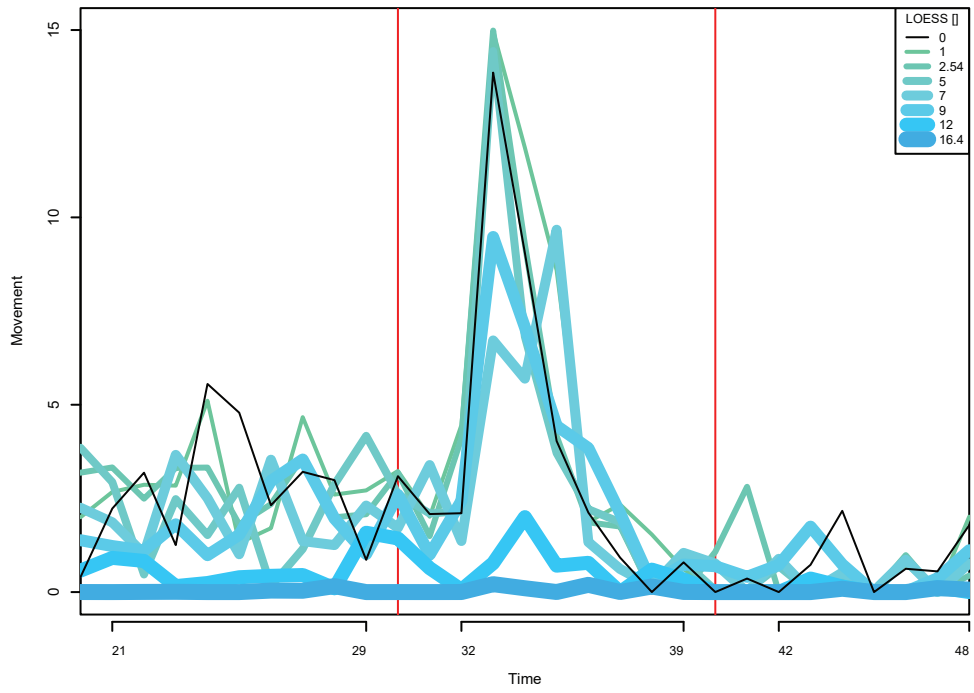

## Standard

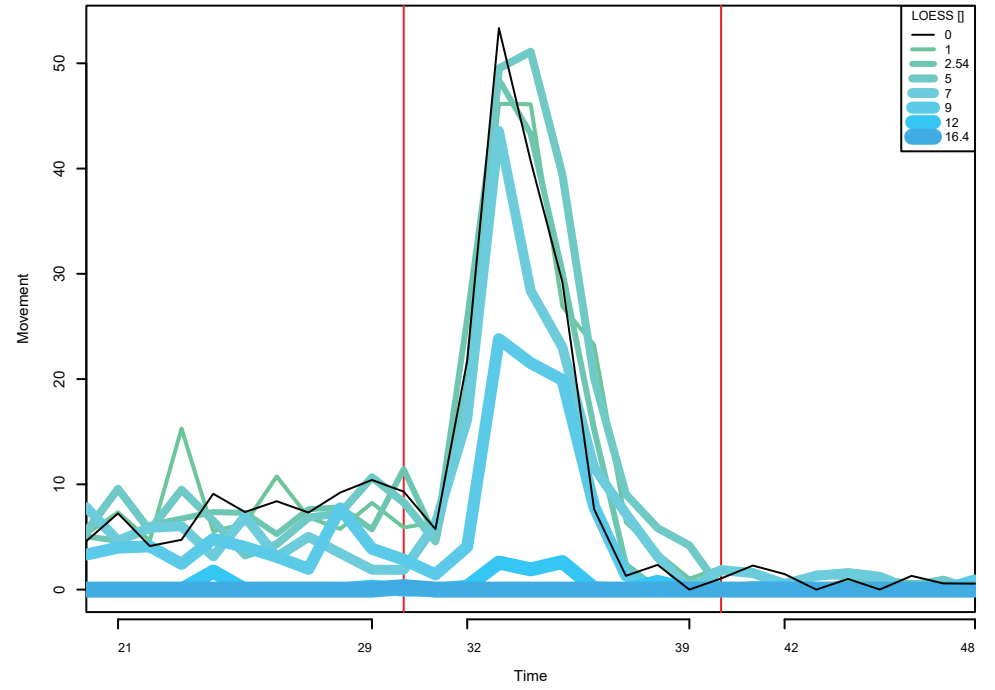

# Hydroxyurea

## Chorion on

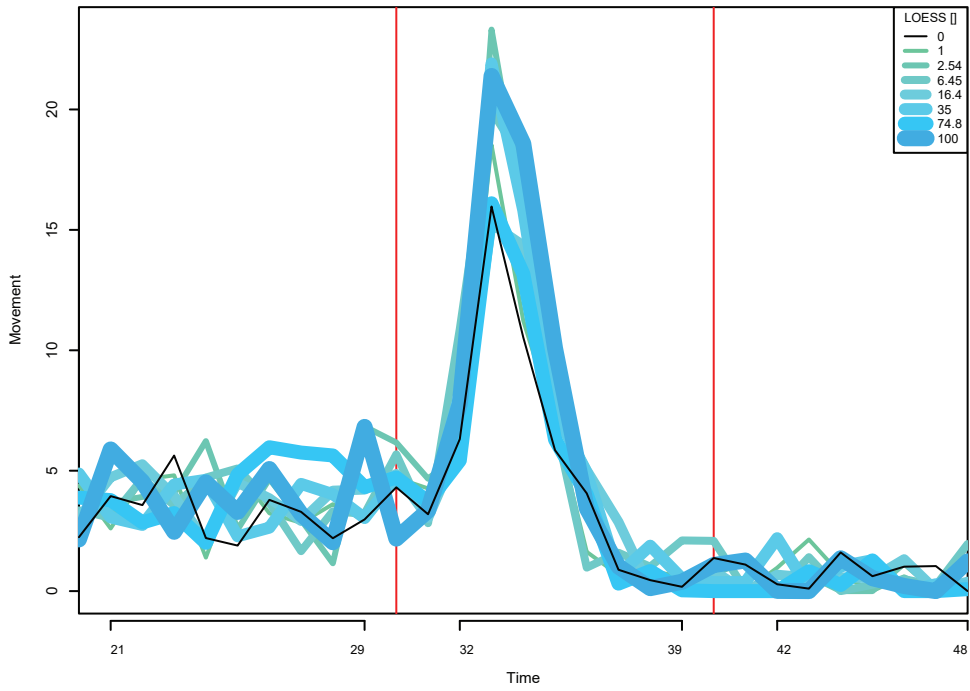

## Standard

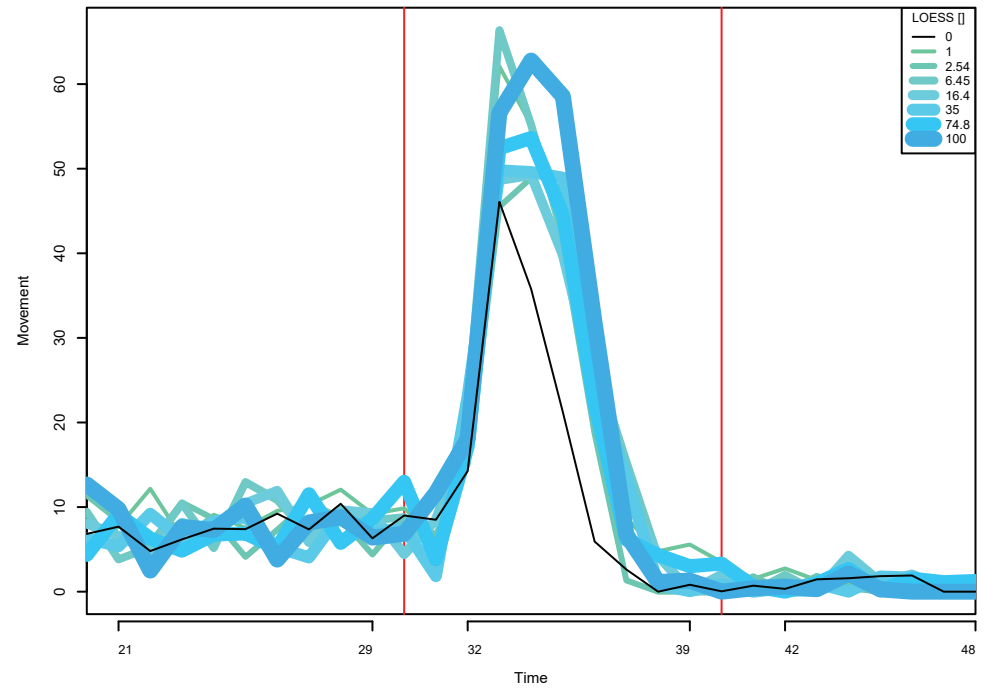

# MWCNTs

## Chorion on

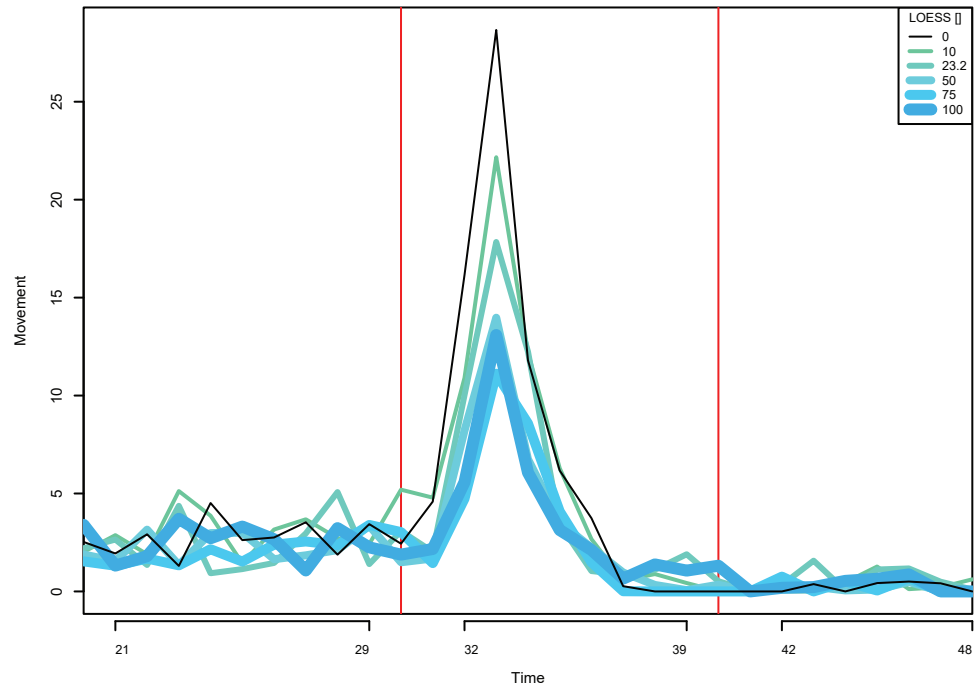

## Standard

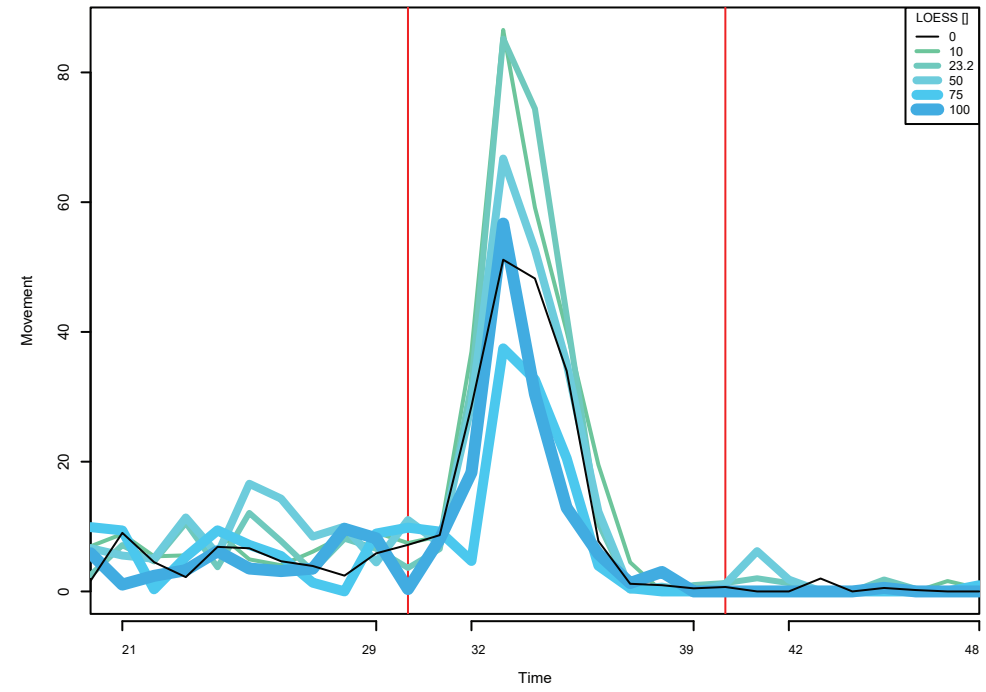



# Napthalene

## Chorion on

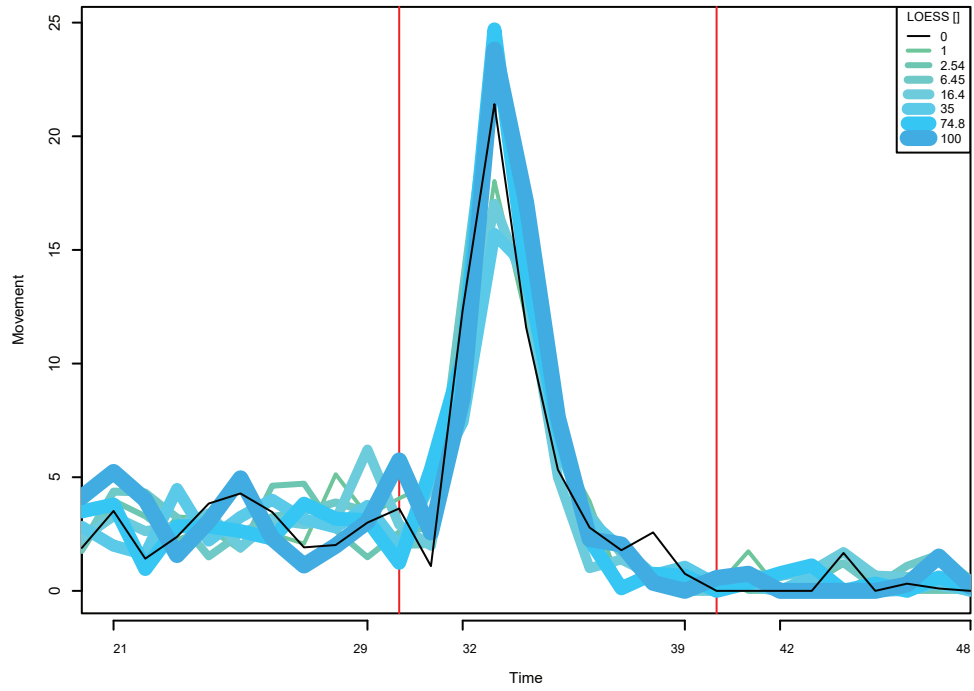

## Standard

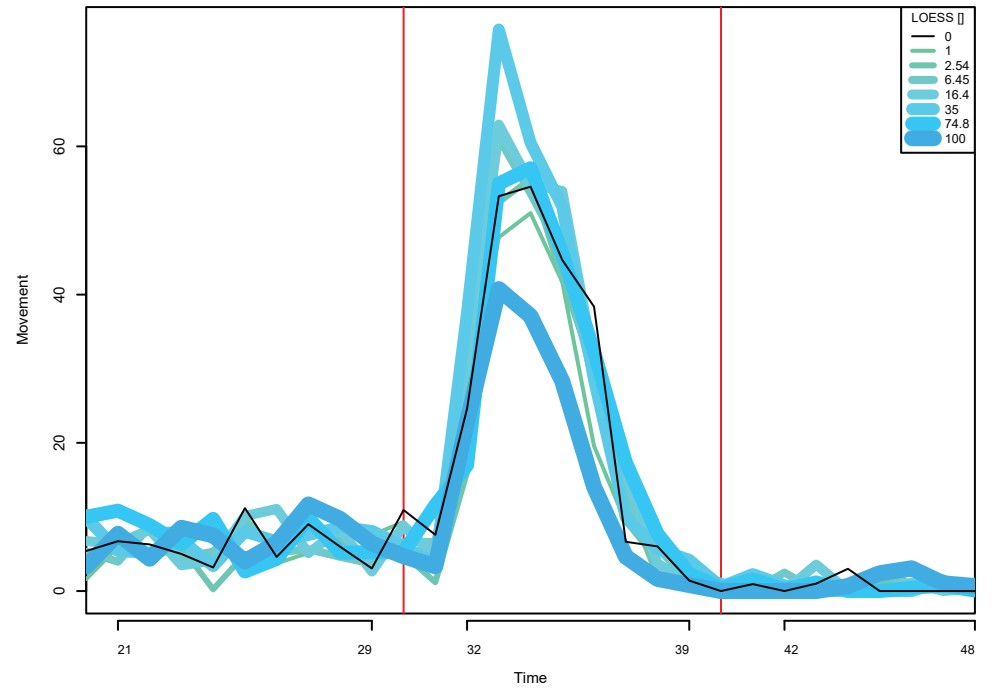

# Permethrin

## Chorion on

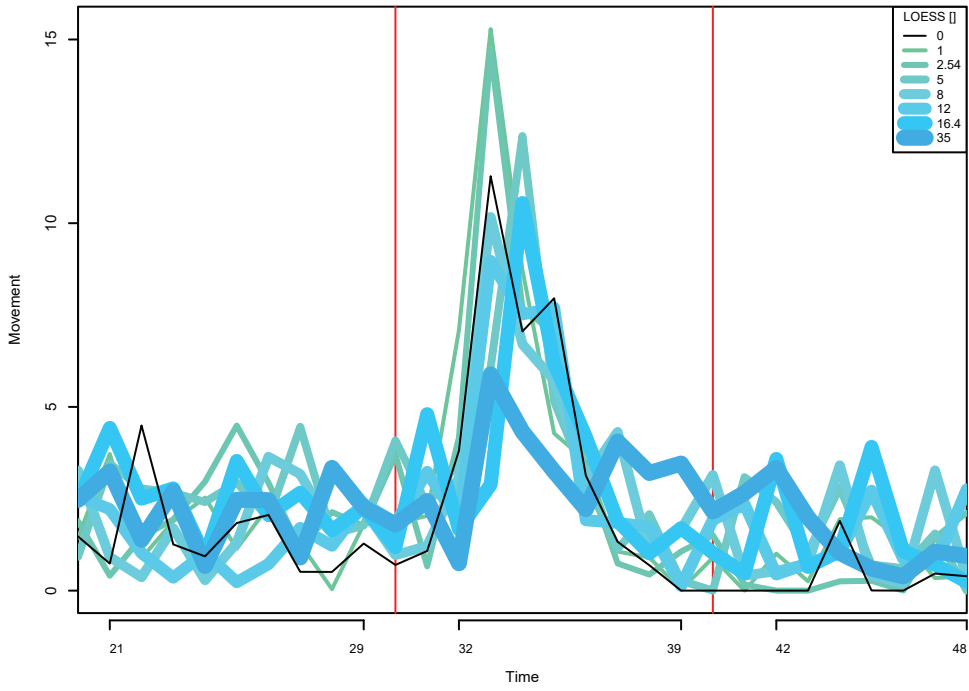

## Standard

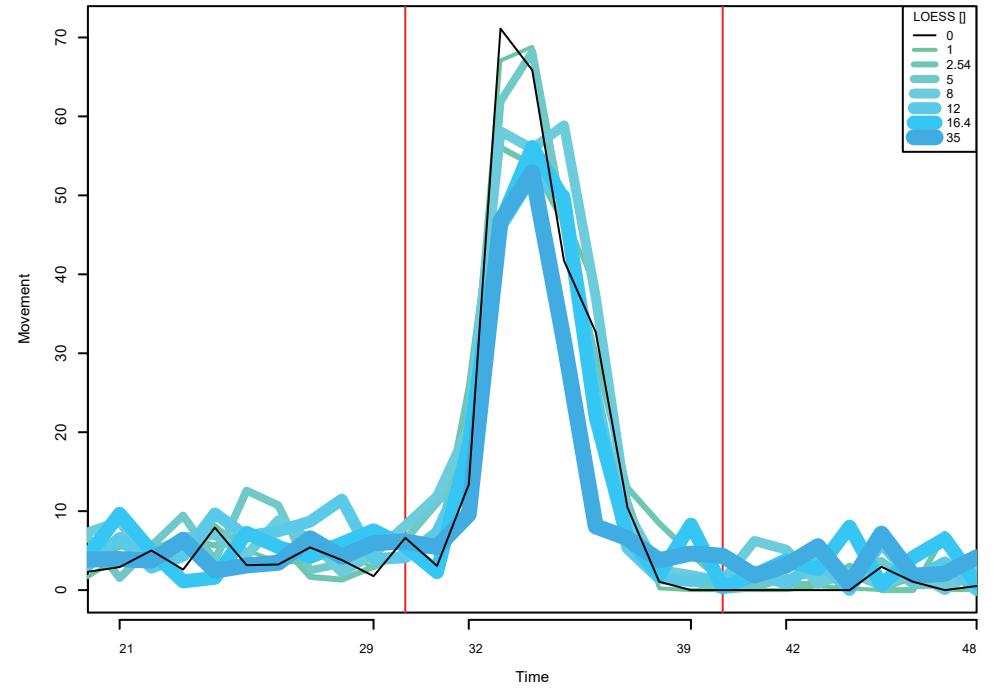

# Pyrene

## Chorion on

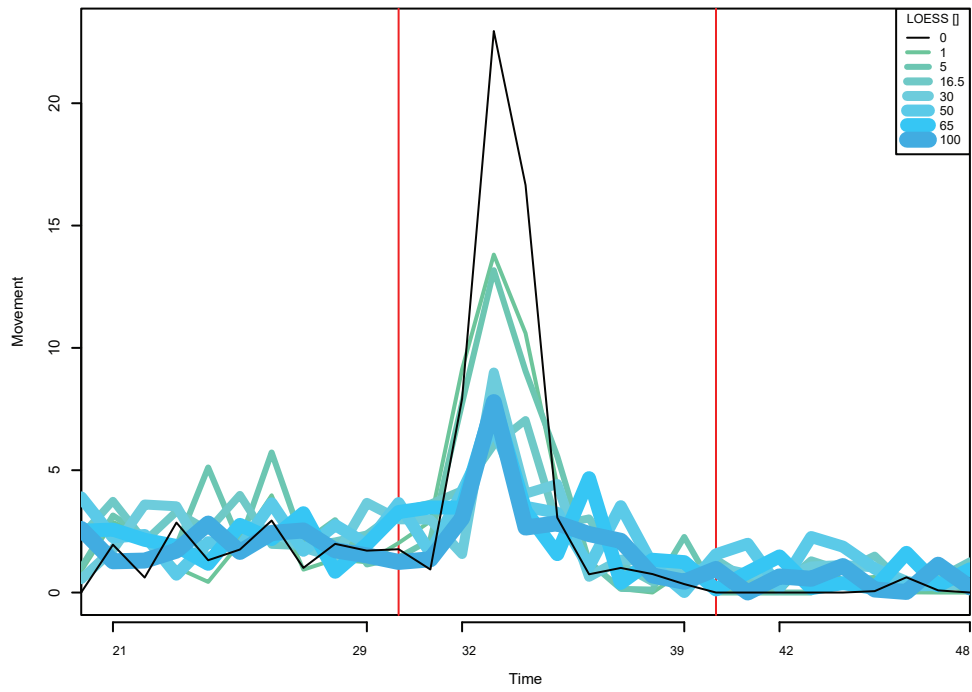

## Standard

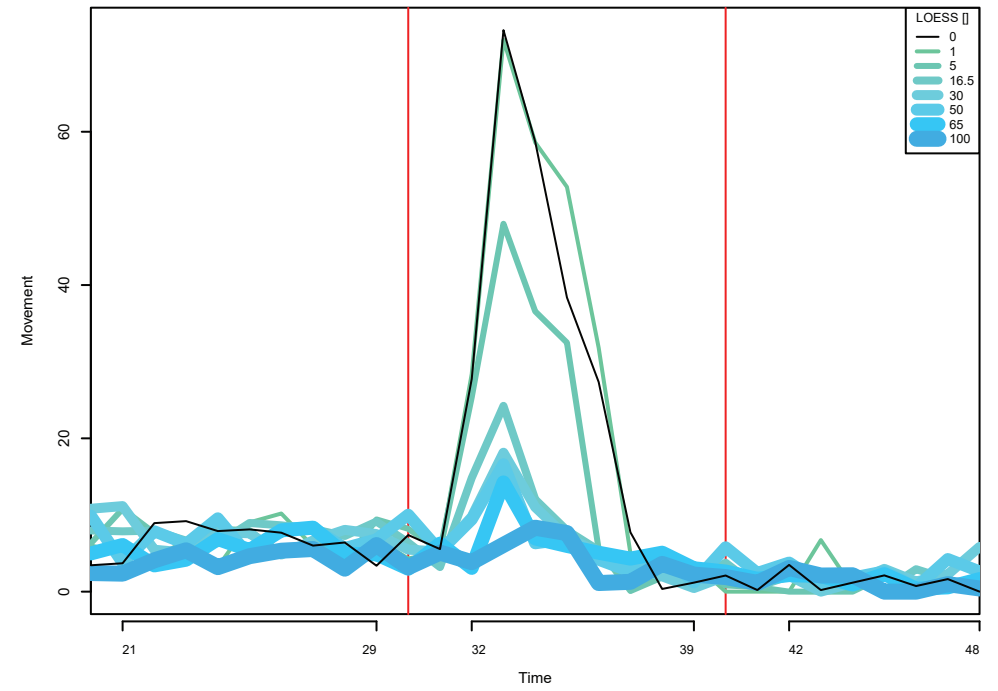

# Retene

## Chorion on

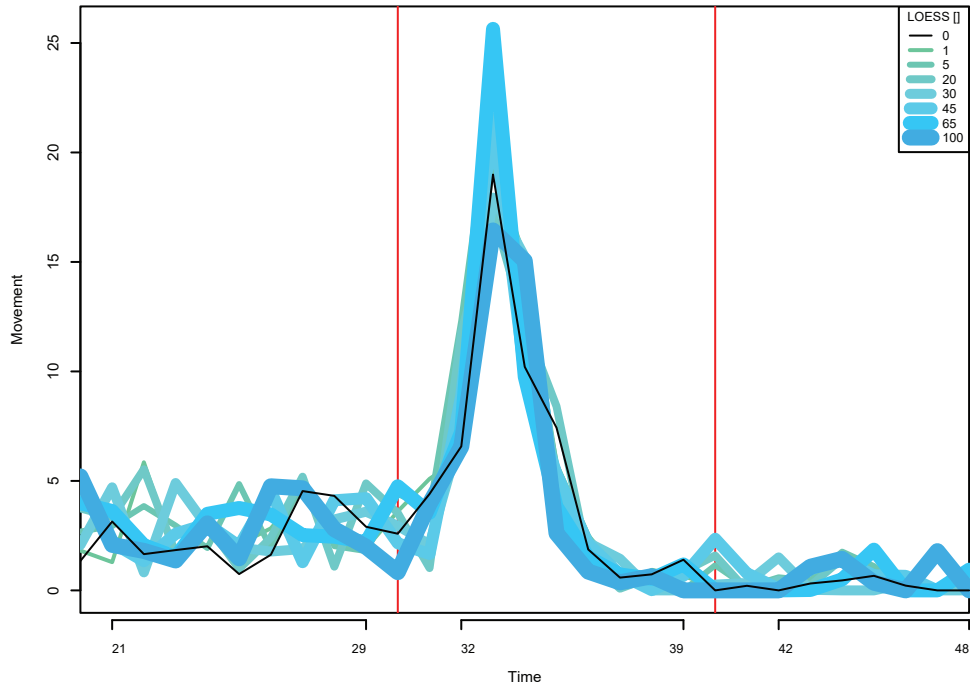

## Standard

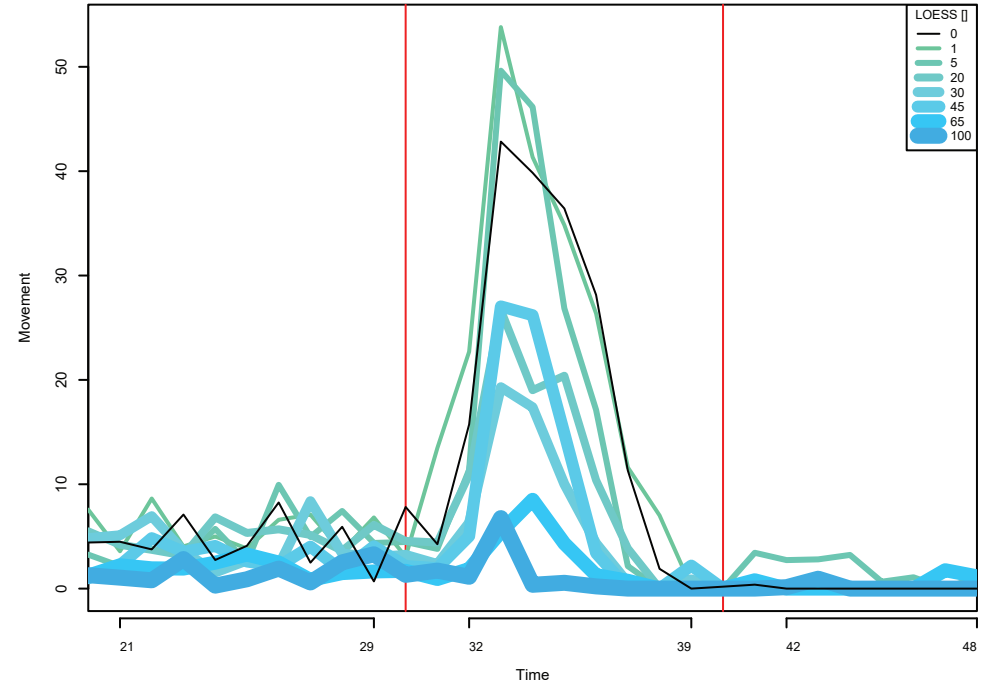

**Figure S2.** Embryonic photomotor response (EPR) compiled data for each concentration of each test agent under chorion-on and standard conditions. Each panel shows movement (dimensionless index) versus time (sec). For all chemicals, concentration units are micromolar. For MWCNTs, concentration units are micrograms per milliliter.

**Table S3.** Larval photomotor response (LPR) compiled data. DR = daily renewal; LD = light/dark cycle. For all chemicals, concentration units are micromolar. For MWCNTs, concentration units are micrograms per milliliter.

| Test Agent | Treatment | Concentration | Phase | # viable animals | # total animals | % viable animals | More than 70% viable | interval | AUC    | Pval  | RelativeRatio | Significance p<0.01 | activity | Sig |
|------------|-----------|---------------|-------|------------------|-----------------|------------------|----------------------|----------|--------|-------|---------------|---------------------|----------|-----|
| Abamectin  | Chorion   | 0             | Dark  | 34               | 36              | 0.94             | TRUE                 | Dark     | 18.788 | 1     | 0             | NA                  | NA       | NA  |
| Abamectin  | Chorion   | 0.1           | Dark  | 27               | 36              | 0.75             | TRUE                 | Dark     | 8.913  | 0     | -1.197        | YES                 | HYPO     | YES |
| Abamectin  | Chorion   | 0.2           | Dark  | 0                | 36              | 0                | FALSE                | Dark     | NA     | NA    | NA            | NA                  | NA       | NA  |
| Abamectin  | Chorion   | 0.4           | Dark  | 0                | 36              | 0                | FALSE                | Dark     | NA     | NA    | NA            | NA                  | NA       | NA  |
| Abamectin  | Chorion   | 0.5           | Dark  | 0                | 36              | 0                | FALSE                | Dark     | NA     | NA    | NA            | NA                  | NA       | NA  |
| Abamectin  | Chorion   | 0.6           | Dark  | 0                | 36              | 0                | FALSE                | Dark     | NA     | NA    | NA            | NA                  | NA       | NA  |
| Abamectin  | Chorion   | 0.8           | Dark  | 0                | 36              | 0                | FALSE                | Dark     | NA     | NA    | NA            | NA                  | NA       | NA  |
| Abamectin  | Chorion   | 1             | Dark  | 0                | 36              | 0                | FALSE                | Dark     | NA     | NA    | NA            | NA                  | NA       | NA  |
| Abamectin  | Chorion   | 0             | Light | 34               | 36              | 0.94             | TRUE                 | Light    | -4.074 | 1     | 0             | NA                  | NA       | NA  |
| Abamectin  | Chorion   | 0.1           | Light | 27               | 36              | 0.75             | TRUE                 | Light    | 14.617 | 0.02  | -2.54         | NA                  | NA       | NA  |
| Abamectin  | Chorion   | 0.2           | Light | 0                | 36              | 0                | FALSE                | Light    | NA     | NA    | NA            | NA                  | NA       | NA  |
| Abamectin  | Chorion   | 0.4           | Light | 0                | 36              | 0                | FALSE                | Light    | NA     | NA    | NA            | NA                  | NA       | NA  |
| Abamectin  | Chorion   | 0.5           | Light | 0                | 36              | 0                | FALSE                | Light    | NA     | NA    | NA            | NA                  | NA       | NA  |
| Abamectin  | Chorion   | 0.6           | Light | 0                | 36              | 0                | FALSE                | Light    | NA     | NA    | NA            | NA                  | NA       | NA  |
| Abamectin  | Chorion   | 0.8           | Light | 0                | 36              | 0                | FALSE                | Light    | NA     | NA    | NA            | NA                  | NA       | NA  |
| Abamectin  | Chorion   | 1             | Light | 0                | 36              | 0                | FALSE                | Light    | NA     | NA    | NA            | NA                  | NA       | NA  |
| Abamectin  | DR        | 0             | Dark  | 36               | 36              | 1                | TRUE                 | Dark     | 15.007 | 1     | 0             | NA                  | NA       | NA  |
| Abamectin  | DR        | 0.1           | Dark  | 36               | 36              | 1                | TRUE                 | Dark     | 35.944 | 0     | 0.237         | YES                 | HYPER    | YES |
| Abamectin  | DR        | 0.2           | Dark  | 34               | 36              | 0.94             | TRUE                 | Dark     | 40.985 | 0     | 0.101         | YES                 | HYPER    | YES |
| Abamectin  | DR        | 0.4           | Dark  | 2                | 36              | 0.06             | FALSE                | Dark     | NA     | NA    | NA            | NA                  | NA       | NA  |
| Abamectin  | DR        | 0.5           | Dark  | 0                | 36              | 0                | FALSE                | Dark     | NA     | NA    | NA            | NA                  | NA       | NA  |
| Abamectin  | DR        | 0.6           | Dark  | 0                | 36              | 0                | FALSE                | Dark     | NA     | NA    | NA            | NA                  | NA       | NA  |
| Abamectin  | DR        | 0.8           | Dark  | 0                | 36              | 0                | FALSE                | Dark     | NA     | NA    | NA            | NA                  | NA       | NA  |
| Abamectin  | DR        | 1             | Dark  | 3                | 36              | 0.08             | FALSE                | Dark     | NA     | NA    | NA            | NA                  | NA       | NA  |
| Abamectin  | DR        | 0             | Light | 36               | 36              | 1                | TRUE                 | Light    | -38.31 | 1     | 0             | NA                  | NA       | NA  |
| Abamectin  | DR        | 0.1           | Light | 36               | 36              | 1                | TRUE                 | Light    | 19.752 | 0     | -1.763        | YES                 | HYPO     | YES |
| Abamectin  | DR        | 0.2           | Light | 34               | 36              | 0.94             | TRUE                 | Light    | 34.14  | 0     | -1.703        | YES                 | HYPO     | YES |
| Abamectin  | DR        | 0.4           | Light | 2                | 36              | 0.06             | FALSE                | Light    | NA     | NA    | NA            | NA                  | NA       | NA  |
| Abamectin  | DR        | 0.5           | Light | 0                | 36              | 0                | FALSE                | Light    | NA     | NA    | NA            | NA                  | NA       | NA  |
| Abamectin  | DR        | 0.6           | Light | 0                | 36              | 0                | FALSE                | Light    | NA     | NA    | NA            | NA                  | NA       | NA  |
| Abamectin  | DR        | 0.8           | Light | 0                | 36              | 0                | FALSE                | Light    | NA     | NA    | NA            | NA                  | NA       | NA  |
| Abamectin  | DR        | 1             | Light | 3                | 36              | 0.08             | FALSE                | Light    | NA     | NA    | NA            | NA                  | NA       | NA  |
| Abamectin  | LD        | 0             | Dark  | 31               | 36              | 0.86             | TRUE                 | Dark     | 29.135 | 1     | 0             | NA                  | NA       | NA  |
| Abamectin  | LD        | 0.1           | Dark  | 29               | 36              | 0.81             | TRUE                 | Dark     | 39.385 | 0     | -0.169        | YES                 | HYPO     | YES |
| Abamectin  | LD        | 0.2           | Dark  | 29               | 36              | 0.81             | TRUE                 | Dark     | 38.23  | 0     | -0.097        | YES                 | NA       | NA  |
| Abamectin  | LD        | 0.4           | Dark  | 12               | 36              | 0.33             | FALSE                | Dark     | NA     | NA    | NA            | NA                  | NA       | NA  |
| Abamectin  | LD        | 0.5           | Dark  | 8                | 36              | 0.22             | FALSE                | Dark     | NA     | NA    | NA            | NA                  | NA       | NA  |
| Abamectin  | LD        | 0.6           | Dark  | 7                | 36              | 0.19             | FALSE                | Dark     | NA     | NA    | NA            | NA                  | NA       | NA  |
| Abamectin  | LD        | 0.8           | Dark  | 1                | 36              | 0.03             | FALSE                | Dark     | NA     | NA    | NA            | NA                  | NA       | NA  |
| Abamectin  | LD        | 1             | Dark  | 3                | 36              | 0.08             | FALSE                | Dark     | NA     | NA    | NA            | NA                  | NA       | NA  |
| Abamectin  | LD        | 0             | Light | 31               | 36              | 0.86             | TRUE                 | Light    | 8.145  | 1     | 0             | NA                  | NA       | NA  |
| Abamectin  | LD        | 0.1           | Light | 29               | 36              | 0.81             | TRUE                 | Light    | 38.621 | 0     | 6.071         | YES                 | HYPER    | YES |
| Abamectin  | LD        | 0.2           | Light | 29               | 36              | 0.81             | TRUE                 | Light    | 36.826 | 0.151 | 2.264         | NA                  | NA       | NA  |
| Abamectin  | LD        | 0.4           | Light | 12               | 36              | 0.33             | FALSE                | Light    | NA     | NA    | NA            | NA                  | NA       | NA  |
| Abamectin  | LD        | 0.5           | Light | 8                | 36              | 0.22             | FALSE                | Light    | NA     | NA    | NA            | NA                  | NA       | NA  |
| Abamectin  | LD        | 0.6           | Light | 7                | 36              | 0.19             | FALSE                | Light    | NA     | NA    | NA            | NA                  | NA       | NA  |
| Abamectin  | LD        | 0.8           | Light | 1                | 36              | 0.03             | FALSE                | Light    | NA     | NA    | NA            | NA                  | NA       | NA  |
| Abamectin  | LD        | 1             | Light | 3                | 36              | 0.08             | FALSE                | Light    | NA     | NA    | NA            | NA                  | NA       | NA  |
| Abamectin  | Standard  | 0             | Dark  | 35               | 36              | 0.97             | TRUE                 | Dark     | 17.691 | 1     | 0             | NA                  | NA       | NA  |
| Abamectin  | Standard  | 0.1           | Dark  | 33               | 36              | 0.92             | TRUE                 | Dark     | 20.252 | 0     | 0.043         | YES                 | NA       | NA  |
| Abamectin  | Standard  | 0.2           | Dark  | 32               | 36              | 0.89             | TRUE                 | Dark     | 31.294 | 0.227 | 0.366         | NA                  | NA       | NA  |
| Abamectin  | Standard  | 0.4           | Dark  | 31               | 36              | 0.86             | TRUE                 | Dark     | 38.047 | 0     | 0.015         | YES                 | NA       | NA  |
| Abamectin  | Standard  | 0.5           | Dark  | 32               | 36              | 0.89             | TRUE                 | Dark     | 40.69  | 0     | 0.014         | YES                 | NA       | NA  |
| Abamectin  | Standard  | 0.6           | Dark  | 19               | 36              | 0.53             | FALSE                | Dark     | NA     | NA    | NA            | NA                  | NA       | NA  |

| Test Agent   | Treatment | Concentration | Phase | # viable animals | # total animals | % viable animals | More than 70% viable | interval | AUC     | Pval  | RelativeRatio | Significance p<0.01 | activity | Sig |
|--------------|-----------|---------------|-------|------------------|-----------------|------------------|----------------------|----------|---------|-------|---------------|---------------------|----------|-----|
| Abamectin    | Chorion   | 0             | Dark  | 34               | 36              | 0.94             | TRUE                 | Dark     | 18.788  | 1     | 0             | NA                  | NA       | NA  |
| Abamectin    | Chorion   | 0.1           | Dark  | 27               | 36              | 0.75             | TRUE                 | Dark     | 8.913   | 0     | -1.197        | YES                 | HYP0     | YES |
| Abamectin    | Chorion   | 0.2           | Dark  | 0                | 36              | 0                | FALSE                | Dark     | NA      | NA    | NA            | NA                  | NA       | NA  |
| Abamectin    | Chorion   | 0.4           | Dark  | 0                | 36              | 0                | FALSE                | Dark     | NA      | NA    | NA            | NA                  | NA       | NA  |
| Abamectin    | Chorion   | 0.5           | Dark  | 0                | 36              | 0                | FALSE                | Dark     | NA      | NA    | NA            | NA                  | NA       | NA  |
| Abamectin    | Chorion   | 0.6           | Dark  | 0                | 36              | 0                | FALSE                | Dark     | NA      | NA    | NA            | NA                  | NA       | NA  |
| Abamectin    | Chorion   | 0.8           | Dark  | 0                | 36              | 0                | FALSE                | Dark     | NA      | NA    | NA            | NA                  | NA       | NA  |
| Abamectin    | Chorion   | 1             | Dark  | 0                | 36              | 0                | FALSE                | Dark     | NA      | NA    | NA            | NA                  | NA       | NA  |
| Abamectin    | Chorion   | 0             | Light | 34               | 36              | 0.94             | TRUE                 | Light    | -4.074  | 1     | 0             | NA                  | NA       | NA  |
| Abamectin    | Chorion   | 0.1           | Light | 27               | 36              | 0.75             | TRUE                 | Light    | 14.617  | 0.02  | -2.54         | NA                  | NA       | NA  |
| Abamectin    | Chorion   | 0.2           | Light | 0                | 36              | 0                | FALSE                | Light    | NA      | NA    | NA            | NA                  | NA       | NA  |
| Abamectin    | Chorion   | 0.4           | Light | 0                | 36              | 0                | FALSE                | Light    | NA      | NA    | NA            | NA                  | NA       | NA  |
| Abamectin    | Chorion   | 0.5           | Light | 0                | 36              | 0                | FALSE                | Light    | NA      | NA    | NA            | NA                  | NA       | NA  |
| Abamectin    | Chorion   | 0.6           | Light | 0                | 36              | 0                | FALSE                | Light    | NA      | NA    | NA            | NA                  | NA       | NA  |
| Abamectin    | Chorion   | 0.8           | Light | 0                | 36              | 0                | FALSE                | Light    | NA      | NA    | NA            | NA                  | NA       | NA  |
| Abamectin    | Chorion   | 1             | Light | 0                | 36              | 0                | FALSE                | Light    | NA      | NA    | NA            | NA                  | NA       | NA  |
| Abamectin    | DR        | 0             | Dark  | 36               | 36              | 1                | TRUE                 | Dark     | 15.007  | 1     | 0             | NA                  | NA       | NA  |
| Abamectin    | DR        | 0.1           | Dark  | 36               | 36              | 1                | TRUE                 | Dark     | 35.944  | 0     | 0.237         | YES                 | HYP0R    | YES |
| Abamectin    | DR        | 0.2           | Dark  | 34               | 36              | 0.94             | TRUE                 | Dark     | 40.985  | 0     | 0.101         | YES                 | HYP0R    | YES |
| Abamectin    | DR        | 0.4           | Dark  | 2                | 36              | 0.06             | FALSE                | Dark     | NA      | NA    | NA            | NA                  | NA       | NA  |
| Abamectin    | DR        | 0.5           | Dark  | 0                | 36              | 0                | FALSE                | Dark     | NA      | NA    | NA            | NA                  | NA       | NA  |
| Abamectin    | DR        | 0.6           | Dark  | 0                | 36              | 0                | FALSE                | Dark     | NA      | NA    | NA            | NA                  | NA       | NA  |
| Abamectin    | DR        | 0.8           | Dark  | 0                | 36              | 0                | FALSE                | Dark     | NA      | NA    | NA            | NA                  | NA       | NA  |
| Abamectin    | DR        | 1             | Dark  | 3                | 36              | 0.08             | FALSE                | Dark     | NA      | NA    | NA            | NA                  | NA       | NA  |
| Abamectin    | DR        | 0             | Light | 36               | 36              | 1                | TRUE                 | Light    | -38.311 | 1     | 0             | NA                  | NA       | NA  |
| Abamectin    | DR        | 0.1           | Light | 36               | 36              | 1                | TRUE                 | Light    | 19.752  | 0     | -1.763        | YES                 | HYP0     | YES |
| Abamectin    | DR        | 0.2           | Light | 34               | 36              | 0.94             | TRUE                 | Light    | 34.14   | 0     | -1.703        | YES                 | HYP0     | YES |
| Abamectin    | DR        | 0.4           | Light | 2                | 36              | 0.06             | FALSE                | Light    | NA      | NA    | NA            | NA                  | NA       | NA  |
| Abamectin    | DR        | 0.5           | Light | 0                | 36              | 0                | FALSE                | Light    | NA      | NA    | NA            | NA                  | NA       | NA  |
| Abamectin    | DR        | 0.6           | Light | 0                | 36              | 0                | FALSE                | Light    | NA      | NA    | NA            | NA                  | NA       | NA  |
| Abamectin    | DR        | 0.8           | Light | 0                | 36              | 0                | FALSE                | Light    | NA      | NA    | NA            | NA                  | NA       | NA  |
| Abamectin    | DR        | 1             | Light | 3                | 36              | 0.08             | FALSE                | Light    | NA      | NA    | NA            | NA                  | NA       | NA  |
| Abamectin    | LD        | 0             | Dark  | 31               | 36              | 0.86             | TRUE                 | Dark     | 29.135  | 1     | 0             | NA                  | NA       | NA  |
| Abamectin    | LD        | 0.1           | Dark  | 29               | 36              | 0.81             | TRUE                 | Dark     | 39.385  | 0     | -0.169        | YES                 | HYP0     | YES |
| Abamectin    | LD        | 0.2           | Dark  | 29               | 36              | 0.81             | TRUE                 | Dark     | 38.23   | 0     | -0.097        | YES                 | NA       | NA  |
| Abamectin    | LD        | 0.4           | Dark  | 12               | 36              | 0.33             | FALSE                | Dark     | NA      | NA    | NA            | NA                  | NA       | NA  |
| Abamectin    | LD        | 0.5           | Dark  | 8                | 36              | 0.22             | FALSE                | Dark     | NA      | NA    | NA            | NA                  | NA       | NA  |
| Abamectin    | LD        | 0.6           | Dark  | 7                | 36              | 0.19             | FALSE                | Dark     | NA      | NA    | NA            | NA                  | NA       | NA  |
| Abamectin    | LD        | 0.8           | Dark  | 1                | 36              | 0.03             | FALSE                | Dark     | NA      | NA    | NA            | NA                  | NA       | NA  |
| Abamectin    | LD        | 1             | Dark  | 3                | 36              | 0.08             | FALSE                | Dark     | NA      | NA    | NA            | NA                  | NA       | NA  |
| Abamectin    | LD        | 0             | Light | 31               | 36              | 0.86             | TRUE                 | Light    | 8.145   | 1     | 0             | NA                  | NA       | NA  |
| Abamectin    | LD        | 0.1           | Light | 29               | 36              | 0.81             | TRUE                 | Light    | 38.621  | 0     | 6.071         | YES                 | HYP0R    | YES |
| Abamectin    | LD        | 0.2           | Light | 29               | 36              | 0.81             | TRUE                 | Light    | 36.826  | 0.151 | 2.264         | NA                  | NA       | NA  |
| Abamectin    | LD        | 0.4           | Light | 12               | 36              | 0.33             | FALSE                | Light    | NA      | NA    | NA            | NA                  | NA       | NA  |
| Abamectin    | LD        | 0.5           | Light | 8                | 36              | 0.22             | FALSE                | Light    | NA      | NA    | NA            | NA                  | NA       | NA  |
| Abamectin    | LD        | 0.6           | Light | 7                | 36              | 0.19             | FALSE                | Light    | NA      | NA    | NA            | NA                  | NA       | NA  |
| Abamectin    | LD        | 0.8           | Light | 1                | 36              | 0.03             | FALSE                | Light    | NA      | NA    | NA            | NA                  | NA       | NA  |
| Abamectin    | LD        | 1             | Light | 3                | 36              | 0.08             | FALSE                | Light    | NA      | NA    | NA            | NA                  | NA       | NA  |
| Abamectin    | Standard  | 0             | Dark  | 35               | 36              | 0.97             | TRUE                 | Dark     | 17.691  | 1     | 0             | NA                  | NA       | NA  |
| Abamectin    | Standard  | 0.1           | Dark  | 33               | 36              | 0.92             | TRUE                 | Dark     | 20.252  | 0     | 0.043         | YES                 | NA       | NA  |
| Abamectin    | Standard  | 0.2           | Dark  | 32               | 36              | 0.89             | TRUE                 | Dark     | 31.294  | 0.227 | 0.366         | NA                  | NA       | NA  |
| Abamectin    | Standard  | 0.4           | Dark  | 31               | 36              | 0.86             | TRUE                 | Dark     | 38.047  | 0     | 0.015         | YES                 | NA       | NA  |
| Abamectin    | Standard  | 0.5           | Dark  | 32               | 36              | 0.89             | TRUE                 | Dark     | 40.69   | 0     | 0.014         | YES                 | NA       | NA  |
| Abamectin    | Standard  | 0.6           | Dark  | 19               | 36              | 0.53             | FALSE                | Dark     | NA      | NA    | NA            | NA                  | NA       | NA  |
| Abamectin    | Standard  | 0.8           | Dark  | 0                | 36              | 0                | FALSE                | Dark     | NA      | NA    | NA            | NA                  | NA       | NA  |
| Abamectin    | Standard  | 1             | Dark  | 3                | 36              | 0.08             | FALSE                | Dark     | NA      | NA    | NA            | NA                  | NA       | NA  |
| Abamectin    | Standard  | 0             | Light | 35               | 36              | 0.97             | TRUE                 | Light    | -24.634 | 1     | 0             | NA                  | NA       | NA  |
| Abamectin    | Standard  | 0.1           | Light | 33               | 36              | 0.92             | TRUE                 | Light    | 6.146   | 0.986 | -0.312        | NA                  | NA       | NA  |
| Abamectin    | Standard  | 0.2           | Light | 32               | 36              | 0.89             | TRUE                 | Light    | 21.16   | 0.151 | -2.006        | NA                  | NA       | NA  |
| Abamectin    | Standard  | 0.4           | Light | 31               | 36              | 0.86             | TRUE                 | Light    | 34.78   | 0.74  | -3.261        | NA                  | NA       | NA  |
| Abamectin    | Standard  | 0.5           | Light | 32               | 36              | 0.89             | TRUE                 | Light    | 38.453  | 0.003 | -2.693        | YES                 | HYP0     | YES |
| Abamectin    | Standard  | 0.6           | Light | 19               | 36              | 0.53             | FALSE                | Light    | NA      | NA    | NA            | NA                  | NA       | NA  |
| Abamectin    | Standard  | 0.8           | Light | 0                | 36              | 0                | FALSE                | Light    | NA      | NA    | NA            | NA                  | NA       | NA  |
| Abamectin    | Standard  | 1             | Light | 3                | 36              | 0.08             | FALSE                | Light    | NA      | NA    | NA            | NA                  | NA       | NA  |
| Chlorpyrifos | Chorion   | 0             | Dark  | 36               | 36              | 1                | TRUE                 | Dark     | 42.466  | 1     | 0             | NA                  | NA       | NA  |

| Test Agent   | Treatment | Concentration | Phase | # viable animals | # total animals | % viable animals | More than 70% viable | interval | AUC     | Pval  | RelativeRatio | Significance p<0.01 | activity | Sig |
|--------------|-----------|---------------|-------|------------------|-----------------|------------------|----------------------|----------|---------|-------|---------------|---------------------|----------|-----|
| Chlorpyrifos | Chorion   | 2.54          | Dark  | 35               | 36              | 0.97             | TRUE                 | Dark     | 49.252  | 0     | -0.244        | YES                 | HYPO     | YES |
| Chlorpyrifos | Chorion   | 10            | Dark  | 36               | 36              | 1                | TRUE                 | Dark     | 32.58   | 0     | -1.302        | YES                 | HYPO     | YES |
| Chlorpyrifos | Chorion   | 20            | Dark  | 35               | 36              | 0.97             | TRUE                 | Dark     | 22.445  | 0     | -1.248        | YES                 | HYPO     | YES |
| Chlorpyrifos | Chorion   | 40            | Dark  | 24               | 36              | 0.67             | FALSE                | Dark     | 21.326  | 0     | -1.11         | NA                  | NA       | NA  |
| Chlorpyrifos | Chorion   | 60            | Dark  | 7                | 36              | 0.19             | FALSE                | Dark     | NA      | NA    | NA            | NA                  | NA       | NA  |
| Chlorpyrifos | Chorion   | 80            | Dark  | 0                | 36              | 0                | FALSE                | Dark     | NA      | NA    | NA            | NA                  | NA       | NA  |
| Chlorpyrifos | Chorion   | 100           | Dark  | 0                | 36              | 0                | FALSE                | Dark     | NA      | NA    | NA            | NA                  | NA       | NA  |
| Chlorpyrifos | Chorion   | 0             | Light | 36               | 36              | 1                | TRUE                 | Light    | 36.859  | 1     | 0             | NA                  | NA       | NA  |
| Chlorpyrifos | Chorion   | 2.54          | Light | 35               | 36              | 0.97             | TRUE                 | Light    | 53.549  | 0.286 | 1.054         | NA                  | NA       | NA  |
| Chlorpyrifos | Chorion   | 10            | Light | 36               | 36              | 1                | TRUE                 | Light    | 41.997  | 0     | -0.648        | YES                 | HYPO     | YES |
| Chlorpyrifos | Chorion   | 20            | Light | 35               | 36              | 0.97             | TRUE                 | Light    | 27.352  | 0.032 | -1.109        | NA                  | NA       | NA  |
| Chlorpyrifos | Chorion   | 40            | Light | 24               | 36              | 0.67             | FALSE                | Light    | 24.281  | 0.002 | 0.057         | NA                  | NA       | NA  |
| Chlorpyrifos | Chorion   | 60            | Light | 7                | 36              | 0.19             | FALSE                | Light    | NA      | NA    | NA            | NA                  | NA       | NA  |
| Chlorpyrifos | Chorion   | 80            | Light | 0                | 36              | 0                | FALSE                | Light    | NA      | NA    | NA            | NA                  | NA       | NA  |
| Chlorpyrifos | Chorion   | 100           | Light | 0                | 36              | 0                | FALSE                | Light    | NA      | NA    | NA            | NA                  | NA       | NA  |
| Chlorpyrifos | DR        | 0             | Dark  | 33               | 36              | 0.92             | TRUE                 | Dark     | 42.995  | 1     | 0             | NA                  | NA       | NA  |
| Chlorpyrifos | DR        | 2.54          | Dark  | 27               | 36              | 0.75             | TRUE                 | Dark     | 31.232  | 0     | -0.648        | YES                 | HYPO     | YES |
| Chlorpyrifos | DR        | 10            | Dark  | 2                | 36              | 0.06             | FALSE                | Dark     | NA      | NA    | NA            | NA                  | NA       | NA  |
| Chlorpyrifos | DR        | 20            | Dark  | 2                | 36              | 0.06             | FALSE                | Dark     | NA      | NA    | NA            | NA                  | NA       | NA  |
| Chlorpyrifos | DR        | 40            | Dark  | 2                | 36              | 0.06             | FALSE                | Dark     | NA      | NA    | NA            | NA                  | NA       | NA  |
| Chlorpyrifos | DR        | 60            | Dark  | 2                | 36              | 0.06             | FALSE                | Dark     | NA      | NA    | NA            | NA                  | NA       | NA  |
| Chlorpyrifos | DR        | 80            | Dark  | 2                | 36              | 0.06             | FALSE                | Dark     | NA      | NA    | NA            | NA                  | NA       | NA  |
| Chlorpyrifos | DR        | 100           | Dark  | 1                | 36              | 0.03             | FALSE                | Dark     | NA      | NA    | NA            | NA                  | NA       | NA  |
| Chlorpyrifos | DR        | 0             | Light | 33               | 36              | 0.92             | TRUE                 | Light    | 25.051  | 1     | 0             | NA                  | NA       | NA  |
| Chlorpyrifos | DR        | 2.54          | Light | 27               | 36              | 0.75             | TRUE                 | Light    | 34.502  | 0.286 | -0.301        | NA                  | NA       | NA  |
| Chlorpyrifos | DR        | 10            | Light | 2                | 36              | 0.06             | FALSE                | Light    | NA      | NA    | NA            | NA                  | NA       | NA  |
| Chlorpyrifos | DR        | 20            | Light | 2                | 36              | 0.06             | FALSE                | Light    | NA      | NA    | NA            | NA                  | NA       | NA  |
| Chlorpyrifos | DR        | 40            | Light | 2                | 36              | 0.06             | FALSE                | Light    | NA      | NA    | NA            | NA                  | NA       | NA  |
| Chlorpyrifos | DR        | 60            | Light | 2                | 36              | 0.06             | FALSE                | Light    | NA      | NA    | NA            | NA                  | NA       | NA  |
| Chlorpyrifos | DR        | 80            | Light | 2                | 36              | 0.06             | FALSE                | Light    | NA      | NA    | NA            | NA                  | NA       | NA  |
| Chlorpyrifos | DR        | 100           | Light | 1                | 36              | 0.03             | FALSE                | Light    | NA      | NA    | NA            | NA                  | NA       | NA  |
| Chlorpyrifos | LD        | 0             | Dark  | 32               | 36              | 0.89             | TRUE                 | Dark     | 22.684  | 1     | 0             | NA                  | NA       | NA  |
| Chlorpyrifos | LD        | 2.54          | Dark  | 32               | 36              | 0.89             | TRUE                 | Dark     | 28.754  | 0.872 | 0.099         | NA                  | NA       | NA  |
| Chlorpyrifos | LD        | 10            | Dark  | 26               | 36              | 0.72             | TRUE                 | Dark     | 27.93   | 0     | -0.22         | YES                 | HYPO     | YES |
| Chlorpyrifos | LD        | 20            | Dark  | 19               | 36              | 0.53             | FALSE                | Dark     | NA      | NA    | NA            | NA                  | NA       | NA  |
| Chlorpyrifos | LD        | 40            | Dark  | 13               | 36              | 0.36             | FALSE                | Dark     | NA      | NA    | NA            | NA                  | NA       | NA  |
| Chlorpyrifos | LD        | 60            | Dark  | 0                | 36              | 0                | FALSE                | Dark     | NA      | NA    | NA            | NA                  | NA       | NA  |
| Chlorpyrifos | LD        | 80            | Dark  | 0                | 36              | 0                | FALSE                | Dark     | NA      | NA    | NA            | NA                  | NA       | NA  |
| Chlorpyrifos | LD        | 100           | Dark  | 0                | 36              | 0                | FALSE                | Dark     | NA      | NA    | NA            | NA                  | NA       | NA  |
| Chlorpyrifos | LD        | 0             | Light | 32               | 36              | 0.89             | TRUE                 | Light    | -8.238  | 1     | 0             | NA                  | NA       | NA  |
| Chlorpyrifos | LD        | 2.54          | Light | 32               | 36              | 0.89             | TRUE                 | Light    | 18.7    | 0.151 | -2.303        | NA                  | NA       | NA  |
| Chlorpyrifos | LD        | 10            | Light | 26               | 36              | 0.72             | TRUE                 | Light    | 25.148  | 0     | -2.302        | YES                 | HYPO     | YES |
| Chlorpyrifos | LD        | 20            | Light | 19               | 36              | 0.53             | FALSE                | Light    | NA      | NA    | NA            | NA                  | NA       | NA  |
| Chlorpyrifos | LD        | 40            | Light | 13               | 36              | 0.36             | FALSE                | Light    | NA      | NA    | NA            | NA                  | NA       | NA  |
| Chlorpyrifos | LD        | 60            | Light | 0                | 36              | 0                | FALSE                | Light    | NA      | NA    | NA            | NA                  | NA       | NA  |
| Chlorpyrifos | LD        | 80            | Light | 0                | 36              | 0                | FALSE                | Light    | NA      | NA    | NA            | NA                  | NA       | NA  |
| Chlorpyrifos | LD        | 100           | Light | 0                | 36              | 0                | FALSE                | Light    | NA      | NA    | NA            | NA                  | NA       | NA  |
| Chlorpyrifos | Standard  | 0             | Dark  | 34               | 36              | 0.94             | TRUE                 | Dark     | -9.436  | 1     | 0             | NA                  | NA       | NA  |
| Chlorpyrifos | Standard  | 2.54          | Dark  | 35               | 36              | 0.97             | TRUE                 | Dark     | -8.463  | 0.055 | 0.548         | NA                  | NA       | NA  |
| Chlorpyrifos | Standard  | 10            | Dark  | 36               | 36              | 1                | TRUE                 | Dark     | 3.226   | 0.001 | 2.073         | YES                 | HYPHER   | YES |
| Chlorpyrifos | Standard  | 20            | Dark  | 32               | 36              | 0.89             | TRUE                 | Dark     | 8.935   | 0     | 1.333         | YES                 | HYPHER   | YES |
| Chlorpyrifos | Standard  | 40            | Dark  | 36               | 36              | 1                | TRUE                 | Dark     | 7.736   | 0     | -0.279        | YES                 | HYPO     | YES |
| Chlorpyrifos | Standard  | 60            | Dark  | 22               | 36              | 0.61             | FALSE                | Dark     | 4.482   | 0     | -0.745        | NA                  | NA       | NA  |
| Chlorpyrifos | Standard  | 80            | Dark  | 6                | 36              | 0.17             | FALSE                | Dark     | NA      | NA    | NA            | NA                  | NA       | NA  |
| Chlorpyrifos | Standard  | 100           | Dark  | 1                | 36              | 0.03             | FALSE                | Dark     | NA      | NA    | NA            | NA                  | NA       | NA  |
| Chlorpyrifos | Standard  | 0             | Light | 34               | 36              | 0.94             | TRUE                 | Light    | -51.981 | 1     | 0             | NA                  | NA       | NA  |
| Chlorpyrifos | Standard  | 2.54          | Light | 35               | 36              | 0.97             | TRUE                 | Light    | -28.373 | 1     | 0.274         | NA                  | NA       | NA  |
| Chlorpyrifos | Standard  | 10            | Light | 36               | 36              | 1                | TRUE                 | Light    | -16.479 | 0.286 | -0.066        | NA                  | NA       | NA  |
| Chlorpyrifos | Standard  | 20            | Light | 32               | 36              | 0.89             | TRUE                 | Light    | -0.825  | 0.379 | -0.517        | NA                  | NA       | NA  |
| Chlorpyrifos | Standard  | 40            | Light | 36               | 36              | 1                | TRUE                 | Light    | 5.943   | 0.856 | -0.654        | NA                  | NA       | NA  |
| Chlorpyrifos | Standard  | 60            | Light | 22               | 36              | 0.61             | FALSE                | Light    | 4.123   | 0.614 | -0.384        | NA                  | NA       | NA  |
| Chlorpyrifos | Standard  | 80            | Light | 6                | 36              | 0.17             | FALSE                | Light    | NA      | NA    | NA            | NA                  | NA       | NA  |
| Chlorpyrifos | Standard  | 100           | Light | 1                | 36              | 0.03             | FALSE                | Light    | NA      | NA    | NA            | NA                  | NA       | NA  |
| Estradiol    | Chorion   | 0             | Dark  | 31               | 36              | 0.86             | TRUE                 | Dark     | 24.966  | 1     | 0             | NA                  | NA       | NA  |
| Estradiol    | Chorion   | 1             | Dark  | 32               | 36              | 0.89             | TRUE                 | Dark     | 27.105  | 0     | 0.322         | YES                 | HYPHER   | YES |

| Test Agent  | Treatment | Concentration | Phase | # viable animals | # total animals | % viable animals | More than 70% viable | interval | AUC     | Pval  | RelativeRatio | Significance p<0.01 | activity | Sig |
|-------------|-----------|---------------|-------|------------------|-----------------|------------------|----------------------|----------|---------|-------|---------------|---------------------|----------|-----|
| Estradiol   | Chorion   | 2.54          | Dark  | 33               | 36              | 0.92             | TRUE                 | Dark     | 29.147  | 0     | -0.81         | YES                 | HYPO     | YES |
| Estradiol   | Chorion   | 5             | Dark  | 33               | 36              | 0.92             | TRUE                 | Dark     | 27.293  | 0.023 | -0.026        | NA                  | NA       | NA  |
| Estradiol   | Chorion   | 7             | Dark  | 33               | 36              | 0.92             | TRUE                 | Dark     | 27.33   | 0     | -0.224        | YES                 | HYPO     | YES |
| Estradiol   | Chorion   | 9             | Dark  | 30               | 36              | 0.83             | TRUE                 | Dark     | 22.596  | 0     | -1.139        | YES                 | HYPO     | YES |
| Estradiol   | Chorion   | 12            | Dark  | 4                | 36              | 0.11             | FALSE                | Dark     | NA      | NA    | NA            | NA                  | NA       | NA  |
| Estradiol   | Chorion   | 16.4          | Dark  | 3                | 36              | 0.08             | FALSE                | Dark     | NA      | NA    | NA            | NA                  | NA       | NA  |
| Estradiol   | Chorion   | 0             | Light | 31               | 36              | 0.86             | TRUE                 | Light    | 4.858   | 1     | 0             | NA                  | NA       | NA  |
| Estradiol   | Chorion   | 1             | Light | 32               | 36              | 0.89             | TRUE                 | Light    | 16.28   | 0.614 | -1.225        | NA                  | NA       | NA  |
| Estradiol   | Chorion   | 2.54          | Light | 33               | 36              | 0.92             | TRUE                 | Light    | 33.265  | 0.614 | 10.919        | NA                  | NA       | NA  |
| Estradiol   | Chorion   | 5             | Light | 33               | 36              | 0.92             | TRUE                 | Light    | 24.92   | 0     | -1.091        | YES                 | HYPO     | YES |
| Estradiol   | Chorion   | 7             | Light | 33               | 36              | 0.92             | TRUE                 | Light    | 26.478  | 0.003 | 3.109         | YES                 | HYPER    | YES |
| Estradiol   | Chorion   | 9             | Light | 30               | 36              | 0.83             | TRUE                 | Light    | 25.221  | 0     | -0.149        | YES                 | HYPO     | YES |
| Estradiol   | Chorion   | 12            | Light | 4                | 36              | 0.11             | FALSE                | Light    | NA      | NA    | NA            | NA                  | NA       | NA  |
| Estradiol   | Chorion   | 16.4          | Light | 3                | 36              | 0.08             | FALSE                | Light    | NA      | NA    | NA            | NA                  | NA       | NA  |
| Estradiol   | DR        | 0             | Dark  | 30               | 36              | 0.83             | TRUE                 | Dark     | 4.586   | 1     | 0             | NA                  | NA       | NA  |
| Estradiol   | DR        | 1             | Dark  | 31               | 36              | 0.86             | TRUE                 | Dark     | 12.789  | 0.036 | 0.768         | NA                  | NA       | NA  |
| Estradiol   | DR        | 2.54          | Dark  | 28               | 36              | 0.78             | TRUE                 | Dark     | 16.464  | 0.001 | 0.627         | YES                 | HYPER    | YES |
| Estradiol   | DR        | 5             | Dark  | 28               | 36              | 0.78             | TRUE                 | Dark     | 20.628  | 0     | 0.614         | YES                 | HYPER    | YES |
| Estradiol   | DR        | 7             | Dark  | 22               | 36              | 0.61             | FALSE                | Dark     | 18.979  | 0     | -0.453        | NA                  | NA       | NA  |
| Estradiol   | DR        | 9             | Dark  | 11               | 36              | 0.31             | FALSE                | Dark     | NA      | NA    | NA            | NA                  | NA       | NA  |
| Estradiol   | DR        | 12            | Dark  | 1                | 36              | 0.03             | FALSE                | Dark     | NA      | NA    | NA            | NA                  | NA       | NA  |
| Estradiol   | DR        | 16.4          | Dark  | 0                | 36              | 0                | FALSE                | Dark     | NA      | NA    | NA            | NA                  | NA       | NA  |
| Estradiol   | DR        | 0             | Light | 30               | 36              | 0.83             | TRUE                 | Light    | -23.831 | 1     | 0             | NA                  | NA       | NA  |
| Estradiol   | DR        | 1             | Light | 31               | 36              | 0.86             | TRUE                 | Light    | -2.396  | 0.379 | -0.314        | NA                  | NA       | NA  |
| Estradiol   | DR        | 2.54          | Light | 28               | 36              | 0.78             | TRUE                 | Light    | 9.015   | 0.856 | -0.745        | NA                  | NA       | NA  |
| Estradiol   | DR        | 5             | Light | 28               | 36              | 0.78             | TRUE                 | Light    | 15.963  | 0.614 | -1.544        | NA                  | NA       | NA  |
| Estradiol   | DR        | 7             | Light | 22               | 36              | 0.61             | FALSE                | Light    | 19.083  | 0     | -1.282        | NA                  | NA       | NA  |
| Estradiol   | DR        | 9             | Light | 11               | 36              | 0.31             | FALSE                | Light    | NA      | NA    | NA            | NA                  | NA       | NA  |
| Estradiol   | DR        | 12            | Light | 1                | 36              | 0.03             | FALSE                | Light    | NA      | NA    | NA            | NA                  | NA       | NA  |
| Estradiol   | DR        | 16.4          | Light | 0                | 36              | 0                | FALSE                | Light    | NA      | NA    | NA            | NA                  | NA       | NA  |
| Estradiol   | LD        | 0             | Dark  | 33               | 36              | 0.92             | TRUE                 | Dark     | 36.401  | 1     | 0             | NA                  | NA       | NA  |
| Estradiol   | LD        | 1             | Dark  | 34               | 36              | 0.94             | TRUE                 | Dark     | 38.902  | 0     | 0.167         | YES                 | HYPER    | YES |
| Estradiol   | LD        | 2.54          | Dark  | 34               | 36              | 0.94             | TRUE                 | Dark     | 35.576  | 0     | -0.148        | YES                 | HYPO     | YES |
| Estradiol   | LD        | 5             | Dark  | 31               | 36              | 0.86             | TRUE                 | Dark     | 36.719  | 0     | 0.401         | YES                 | HYPER    | YES |
| Estradiol   | LD        | 7             | Dark  | 25               | 36              | 0.69             | FALSE                | Dark     | 34.096  | 0     | -0.339        | NA                  | NA       | NA  |
| Estradiol   | LD        | 9             | Dark  | 20               | 36              | 0.56             | FALSE                | Dark     | NA      | NA    | NA            | NA                  | NA       | NA  |
| Estradiol   | LD        | 12            | Dark  | 0                | 36              | 0                | FALSE                | Dark     | NA      | NA    | NA            | NA                  | NA       | NA  |
| Estradiol   | LD        | 16.4          | Dark  | 0                | 36              | 0                | FALSE                | Dark     | NA      | NA    | NA            | NA                  | NA       | NA  |
| Estradiol   | LD        | 0             | Light | 33               | 36              | 0.92             | TRUE                 | Light    | 17.925  | 1     | 0             | NA                  | NA       | NA  |
| Estradiol   | LD        | 1             | Light | 34               | 36              | 0.94             | TRUE                 | Light    | 30.528  | 0     | 0.048         | YES                 | NA       | NA  |
| Estradiol   | LD        | 2.54          | Light | 34               | 36              | 0.94             | TRUE                 | Light    | 33.338  | 0.008 | -0.382        | YES                 | HYPO     | YES |
| Estradiol   | LD        | 5             | Light | 31               | 36              | 0.86             | TRUE                 | Light    | 30.984  | 0.072 | -0.808        | NA                  | NA       | NA  |
| Estradiol   | LD        | 7             | Light | 25               | 36              | 0.69             | FALSE                | Light    | 33.855  | 0.49  | -0.389        | NA                  | NA       | NA  |
| Estradiol   | LD        | 9             | Light | 20               | 36              | 0.56             | FALSE                | Light    | NA      | NA    | NA            | NA                  | NA       | NA  |
| Estradiol   | LD        | 12            | Light | 0                | 36              | 0                | FALSE                | Light    | NA      | NA    | NA            | NA                  | NA       | NA  |
| Estradiol   | LD        | 16.4          | Light | 0                | 36              | 0                | FALSE                | Light    | NA      | NA    | NA            | NA                  | NA       | NA  |
| Estradiol   | Standard  | 0             | Dark  | 34               | 36              | 0.94             | TRUE                 | Dark     | 34.436  | 1     | 0             | NA                  | NA       | NA  |
| Estradiol   | Standard  | 1             | Dark  | 31               | 36              | 0.86             | TRUE                 | Dark     | 33.331  | 0     | 0.089         | YES                 | NA       | NA  |
| Estradiol   | Standard  | 2.54          | Dark  | 33               | 36              | 0.92             | TRUE                 | Dark     | 28.468  | 0     | -0.184        | YES                 | HYPO     | YES |
| Estradiol   | Standard  | 5             | Dark  | 30               | 36              | 0.83             | TRUE                 | Dark     | 31.587  | 0.164 | -0.016        | NA                  | NA       | NA  |
| Estradiol   | Standard  | 7             | Dark  | 26               | 36              | 0.72             | TRUE                 | Dark     | 35.023  | 0.226 | 0.267         | NA                  | NA       | NA  |
| Estradiol   | Standard  | 9             | Dark  | 11               | 36              | 0.31             | FALSE                | Dark     | NA      | NA    | NA            | NA                  | NA       | NA  |
| Estradiol   | Standard  | 12            | Dark  | 0                | 36              | 0                | FALSE                | Dark     | NA      | NA    | NA            | NA                  | NA       | NA  |
| Estradiol   | Standard  | 16.4          | Dark  | 0                | 36              | 0                | FALSE                | Dark     | NA      | NA    | NA            | NA                  | NA       | NA  |
| Estradiol   | Standard  | 0             | Light | 34               | 36              | 0.94             | TRUE                 | Light    | 10.326  | 1     | 0             | NA                  | NA       | NA  |
| Estradiol   | Standard  | 1             | Light | 31               | 36              | 0.86             | TRUE                 | Light    | 23.187  | 0.21  | -0.933        | NA                  | NA       | NA  |
| Estradiol   | Standard  | 2.54          | Light | 33               | 36              | 0.92             | TRUE                 | Light    | 24.609  | 0.614 | -1.995        | NA                  | NA       | NA  |
| Estradiol   | Standard  | 5             | Light | 30               | 36              | 0.83             | TRUE                 | Light    | 27.873  | 0.001 | 1.353         | YES                 | HYPER    | YES |
| Estradiol   | Standard  | 7             | Light | 26               | 36              | 0.72             | TRUE                 | Light    | 30.672  | 0.379 | 1.262         | NA                  | NA       | NA  |
| Estradiol   | Standard  | 9             | Light | 11               | 36              | 0.31             | FALSE                | Light    | NA      | NA    | NA            | NA                  | NA       | NA  |
| Estradiol   | Standard  | 12            | Light | 0                | 36              | 0                | FALSE                | Light    | NA      | NA    | NA            | NA                  | NA       | NA  |
| Estradiol   | Standard  | 16.4          | Light | 0                | 36              | 0                | FALSE                | Light    | NA      | NA    | NA            | NA                  | NA       | NA  |
| Hydroxyurea | Chorion   | 0             | Dark  | 34               | 36              | 0.94             | TRUE                 | Dark     | 16.944  | 1     | 0             | NA                  | NA       | NA  |
| Hydroxyurea | Chorion   | 1             | Dark  | 36               | 36              | 1                | TRUE                 | Dark     | 30.995  | 0.036 | 0.166         | NA                  | NA       | NA  |
| Hydroxyurea | Chorion   | 2.54          | Dark  | 35               | 36              | 0.97             | TRUE                 | Dark     | 34.094  | 0.306 | 0.288         | NA                  | NA       | NA  |



| Test Agent  | Treatment | Concentration | Phase | # viable animals | # total animals | % viable animals | More than 70% viable | interval | AUC     | Pval  | RelativeRatio | Significance p<0.01 | activity | Sig |
|-------------|-----------|---------------|-------|------------------|-----------------|------------------|----------------------|----------|---------|-------|---------------|---------------------|----------|-----|
| Hydroxyurea | Chorion   | 6.45          | Dark  | 35               | 36              | 0.97             | TRUE                 | Dark     | 39.043  | 0.002 | 0.354         | YES                 | HYPER    | YES |
| Hydroxyurea | Chorion   | 16.4          | Dark  | 35               | 36              | 0.97             | TRUE                 | Dark     | 33.567  | 0.015 | 0.194         | NA                  | NA       | NA  |
| Hydroxyurea | Chorion   | 35            | Dark  | 33               | 36              | 0.92             | TRUE                 | Dark     | 34.181  | 0.001 | 0.082         | YES                 | NA       | NA  |
| Hydroxyurea | Chorion   | 74.8          | Dark  | 34               | 36              | 0.94             | TRUE                 | Dark     | 38.109  | 0.054 | 0.264         | NA                  | NA       | NA  |
| Hydroxyurea | Chorion   | 100           | Dark  | 34               | 36              | 0.94             | TRUE                 | Dark     | 36.158  | 0.515 | 0.462         | NA                  | NA       | NA  |
| Hydroxyurea | Chorion   | 0             | Light | 34               | 36              | 0.94             | TRUE                 | Light    | -24.817 | 1     | 0             | NA                  | NA       | NA  |
| Hydroxyurea | Chorion   | 1             | Light | 36               | 36              | 1                | TRUE                 | Light    | 18.518  | 0     | -1.873        | YES                 | HYPO     | YES |
| Hydroxyurea | Chorion   | 2.54          | Light | 35               | 36              | 0.97             | TRUE                 | Light    | 25.795  | 0     | -1.201        | YES                 | HYPO     | YES |
| Hydroxyurea | Chorion   | 6.45          | Light | 35               | 36              | 0.97             | TRUE                 | Light    | 33.269  | 0     | -2.141        | YES                 | HYPO     | YES |
| Hydroxyurea | Chorion   | 16.4          | Light | 35               | 36              | 0.97             | TRUE                 | Light    | 29.506  | 0     | 0.885         | YES                 | HYPER    | YES |
| Hydroxyurea | Chorion   | 35            | Light | 33               | 36              | 0.92             | TRUE                 | Light    | 31.515  | 0.02  | -1.443        | NA                  | NA       | NA  |
| Hydroxyurea | Chorion   | 74.8          | Light | 34               | 36              | 0.94             | TRUE                 | Light    | 35.334  | 0     | -2.981        | YES                 | HYPO     | YES |
| Hydroxyurea | Chorion   | 100           | Light | 34               | 36              | 0.94             | TRUE                 | Light    | 32.847  | 0.008 | 0.645         | YES                 | HYPER    | YES |
| Hydroxyurea | DR        | 0             | Dark  | 32               | 36              | 0.89             | TRUE                 | Dark     | 66.685  | 1     | 0             | NA                  | NA       | NA  |
| Hydroxyurea | DR        | 1             | Dark  | 31               | 36              | 0.86             | TRUE                 | Dark     | 73.538  | 0.762 | 0.531         | NA                  | NA       | NA  |
| Hydroxyurea | DR        | 2.54          | Dark  | 31               | 36              | 0.86             | TRUE                 | Dark     | 62.561  | 0.001 | 0.174         | YES                 | HYPER    | YES |
| Hydroxyurea | DR        | 6.45          | Dark  | 32               | 36              | 0.89             | TRUE                 | Dark     | 56.29   | 0.116 | 0.081         | NA                  | NA       | NA  |
| Hydroxyurea | DR        | 16.4          | Dark  | 33               | 36              | 0.92             | TRUE                 | Dark     | 60.659  | 0     | 0.357         | YES                 | HYPER    | YES |
| Hydroxyurea | DR        | 35            | Dark  | 32               | 36              | 0.89             | TRUE                 | Dark     | 58.283  | 0.023 | 0.236         | NA                  | NA       | NA  |
| Hydroxyurea | DR        | 74.8          | Dark  | 32               | 36              | 0.89             | TRUE                 | Dark     | 59.741  | 0.001 | 0.225         | YES                 | HYPER    | YES |
| Hydroxyurea | DR        | 100           | Dark  | 32               | 36              | 0.89             | TRUE                 | Dark     | 59.145  | 0.116 | 0.275         | NA                  | NA       | NA  |
| Hydroxyurea | DR        | 0             | Light | 32               | 36              | 0.89             | TRUE                 | Light    | 60.093  | 1     | 0             | NA                  | NA       | NA  |
| Hydroxyurea | DR        | 1             | Light | 31               | 36              | 0.86             | TRUE                 | Light    | 60.647  | 0.032 | -0.192        | NA                  | NA       | NA  |
| Hydroxyurea | DR        | 2.54          | Light | 31               | 36              | 0.86             | TRUE                 | Light    | 57.87   | 0.072 | -1.08         | NA                  | NA       | NA  |
| Hydroxyurea | DR        | 6.45          | Light | 32               | 36              | 0.89             | TRUE                 | Light    | 53.016  | 0.856 | -1.071        | NA                  | NA       | NA  |
| Hydroxyurea | DR        | 16.4          | Light | 33               | 36              | 0.92             | TRUE                 | Light    | 56.353  | 0.003 | -0.054        | YES                 | NA       | NA  |
| Hydroxyurea | DR        | 35            | Light | 32               | 36              | 0.89             | TRUE                 | Light    | 55.351  | 0.105 | -0.962        | NA                  | NA       | NA  |
| Hydroxyurea | DR        | 74.8          | Light | 32               | 36              | 0.89             | TRUE                 | Light    | 57.43   | 0     | -0.215        | YES                 | HYPO     | YES |
| Hydroxyurea | DR        | 100           | Light | 32               | 36              | 0.89             | TRUE                 | Light    | 56.86   | 0.49  | -0.725        | NA                  | NA       | NA  |
| Hydroxyurea | LD        | 0             | Dark  | 30               | 36              | 0.83             | TRUE                 | Dark     | 34.076  | 1     | 0             | NA                  | NA       | NA  |
| Hydroxyurea | LD        | 1             | Dark  | 27               | 36              | 0.75             | TRUE                 | Dark     | 41.667  | 0.227 | 0.013         | NA                  | NA       | NA  |
| Hydroxyurea | LD        | 2.54          | Dark  | 33               | 36              | 0.92             | TRUE                 | Dark     | 41.943  | 0.638 | -0.064        | NA                  | NA       | NA  |
| Hydroxyurea | LD        | 6.45          | Dark  | 27               | 36              | 0.75             | TRUE                 | Dark     | 41.852  | 0.402 | 0.026         | NA                  | NA       | NA  |
| Hydroxyurea | LD        | 16.4          | Dark  | 24               | 36              | 0.67             | FALSE                | Dark     | 41.586  | 0.227 | 0.076         | NA                  | NA       | NA  |
| Hydroxyurea | LD        | 35            | Dark  | 30               | 36              | 0.83             | TRUE                 | Dark     | 43.292  | 0.402 | 0.212         | NA                  | NA       | NA  |
| Hydroxyurea | LD        | 74.8          | Dark  | 31               | 36              | 0.86             | TRUE                 | Dark     | 45.497  | 0.638 | 0.256         | NA                  | NA       | NA  |
| Hydroxyurea | LD        | 100           | Dark  | 30               | 36              | 0.83             | TRUE                 | Dark     | 45.816  | 0.402 | 0.17          | NA                  | NA       | NA  |
| Hydroxyurea | LD        | 0             | Light | 30               | 36              | 0.83             | TRUE                 | Light    | 10.981  | 1     | 0             | NA                  | NA       | NA  |
| Hydroxyurea | LD        | 1             | Light | 27               | 36              | 0.75             | TRUE                 | Light    | 36.253  | 0.005 | 2.698         | YES                 | HYPER    | YES |
| Hydroxyurea | LD        | 2.54          | Light | 33               | 36              | 0.92             | TRUE                 | Light    | 39.629  | 0     | 1.867         | YES                 | HYPER    | YES |
| Hydroxyurea | LD        | 6.45          | Light | 27               | 36              | 0.75             | TRUE                 | Light    | 39.454  | 0.003 | 1.233         | YES                 | HYPER    | YES |
| Hydroxyurea | LD        | 16.4          | Light | 24               | 36              | 0.67             | FALSE                | Light    | 39.374  | 0     | 0.78          | NA                  | NA       | NA  |
| Hydroxyurea | LD        | 35            | Light | 30               | 36              | 0.83             | TRUE                 | Light    | 40.929  | 0     | 2.129         | YES                 | HYPER    | YES |
| Hydroxyurea | LD        | 74.8          | Light | 31               | 36              | 0.86             | TRUE                 | Light    | 43.472  | 0.013 | 3.156         | NA                  | NA       | NA  |
| Hydroxyurea | LD        | 100           | Light | 30               | 36              | 0.83             | TRUE                 | Light    | 44.412  | 0.032 | 1.66          | NA                  | NA       | NA  |
| Hydroxyurea | Standard  | 0             | Dark  | 32               | 36              | 0.89             | TRUE                 | Dark     | 31.302  | 1     | 0             | NA                  | NA       | NA  |
| Hydroxyurea | Standard  | 1             | Dark  | 32               | 36              | 0.89             | TRUE                 | Dark     | 40.288  | 0.009 | -0.009        | YES                 | NA       | NA  |
| Hydroxyurea | Standard  | 2.54          | Dark  | 34               | 36              | 0.94             | TRUE                 | Dark     | 45.368  | 0.762 | 0.033         | NA                  | NA       | NA  |
| Hydroxyurea | Standard  | 6.45          | Dark  | 30               | 36              | 0.83             | TRUE                 | Dark     | 38.796  | 0.306 | 0.051         | NA                  | NA       | NA  |
| Hydroxyurea | Standard  | 16.4          | Dark  | 31               | 36              | 0.86             | TRUE                 | Dark     | 43.66   | 0.515 | 0.152         | NA                  | NA       | NA  |
| Hydroxyurea | Standard  | 35            | Dark  | 33               | 36              | 0.92             | TRUE                 | Dark     | 46.969  | 0.001 | 0.138         | YES                 | HYPER    | YES |
| Hydroxyurea | Standard  | 74.8          | Dark  | 31               | 36              | 0.86             | TRUE                 | Dark     | 44.44   | 0.95  | 0.149         | NA                  | NA       | NA  |
| Hydroxyurea | Standard  | 100           | Dark  | 28               | 36              | 0.78             | TRUE                 | Dark     | 39.251  | 0.002 | -0.13         | YES                 | HYPO     | YES |
| Hydroxyurea | Standard  | 0             | Light | 32               | 36              | 0.89             | TRUE                 | Light    | -11.047 | 1     | 0             | NA                  | NA       | NA  |
| Hydroxyurea | Standard  | 1             | Light | 32               | 36              | 0.89             | TRUE                 | Light    | 29.384  | 0     | -3.312        | YES                 | HYPO     | YES |
| Hydroxyurea | Standard  | 2.54          | Light | 34               | 36              | 0.94             | TRUE                 | Light    | 39.23   | 0     | -4.168        | YES                 | HYPO     | YES |
| Hydroxyurea | Standard  | 6.45          | Light | 30               | 36              | 0.83             | TRUE                 | Light    | 33.275  | 0.379 | 2.556         | NA                  | NA       | NA  |
| Hydroxyurea | Standard  | 16.4          | Light | 31               | 36              | 0.86             | TRUE                 | Light    | 39.085  | 0     | -4.748        | YES                 | HYPO     | YES |
| Hydroxyurea | Standard  | 35            | Light | 33               | 36              | 0.92             | TRUE                 | Light    | 43.616  | 0.008 | -4.909        | YES                 | HYPO     | YES |
| Hydroxyurea | Standard  | 74.8          | Light | 31               | 36              | 0.86             | TRUE                 | Light    | 41.348  | 0.013 | 1.362         | NA                  | NA       | NA  |
| Hydroxyurea | Standard  | 100           | Light | 28               | 36              | 0.78             | TRUE                 | Light    | 37.596  | 0.21  | 4.271         | NA                  | NA       | NA  |
| MWCNTs      | Chorion   | 0             | Dark  | 43               | 48              | 0.9              | TRUE                 | Dark     | 14.749  | 1     | 0             | NA                  | NA       | NA  |
| MWCNTs      | Chorion   | 10            | Dark  | 48               | 48              | 1                | TRUE                 | Dark     | 19.849  | 0.055 | 0.089         | NA                  | NA       | NA  |
| MWCNTs      | Chorion   | 23.2          | Dark  | 43               | 48              | 0.9              | TRUE                 | Dark     | 19.815  | 0.023 | -0.25         | NA                  | NA       | NA  |
| MWCNTs      | Chorion   | 50            | Dark  | 47               | 48              | 0.98             | TRUE                 | Dark     | 22.099  | 0.869 | 0.043         | NA                  | NA       | NA  |

| Test Agent | Treatment | Concentration | Phase | # viable animals | # total animals | % viable animals | More than 70% viable | interval | AUC     | Pval  | RelativeRatio | Significance p<0.01 | activity | Sig |
|------------|-----------|---------------|-------|------------------|-----------------|------------------|----------------------|----------|---------|-------|---------------|---------------------|----------|-----|
| MWCNTs     | Chorion   | 75            | Dark  | 45               | 48              | 0.94             | TRUE                 | Dark     | 20.493  | 0.164 | 0.158         | NA                  | NA       | NA  |
| MWCNTs     | Chorion   | 100           | Dark  | 47               | 48              | 0.98             | TRUE                 | Dark     | 19.763  | 0.512 | 0.081         | NA                  | NA       | NA  |
| MWCNTs     | Chorion   | 0             | Light | 43               | 48              | 0.9              | TRUE                 | Light    | -37.789 | 1     | 0             | NA                  | NA       | NA  |
| MWCNTs     | Chorion   | 10            | Light | 48               | 48              | 1                | TRUE                 | Light    | 2.031   | 0.999 | -0.381        | NA                  | NA       | NA  |
| MWCNTs     | Chorion   | 23.2          | Light | 43               | 48              | 0.9              | TRUE                 | Light    | 13.692  | 0.614 | -0.711        | NA                  | NA       | NA  |
| MWCNTs     | Chorion   | 50            | Light | 47               | 48              | 0.98             | TRUE                 | Light    | 15.228  | 0     | -0.675        | YES                 | HYP0     | YES |
| MWCNTs     | Chorion   | 75            | Light | 45               | 48              | 0.94             | TRUE                 | Light    | 14.112  | 0.286 | 0.317         | NA                  | NA       | NA  |
| MWCNTs     | Chorion   | 100           | Light | 47               | 48              | 0.98             | TRUE                 | Light    | 14.95   | 0.941 | 0.071         | NA                  | NA       | NA  |
| MWCNTs     | DR        | 0             | Dark  | 43               | 48              | 0.9              | TRUE                 | Dark     | 52.836  | 1     | 0             | NA                  | NA       | NA  |
| MWCNTs     | DR        | 10            | Dark  | 44               | 48              | 0.92             | TRUE                 | Dark     | 60.008  | 0.872 | 0.088         | NA                  | NA       | NA  |
| MWCNTs     | DR        | 23.2          | Dark  | 40               | 48              | 0.83             | TRUE                 | Dark     | 60.555  | 0     | 0.002         | YES                 | NA       | NA  |
| MWCNTs     | DR        | 50            | Dark  | 35               | 48              | 0.73             | TRUE                 | Dark     | 62.683  | 0.015 | -0.065        | NA                  | NA       | NA  |
| MWCNTs     | DR        | 75            | Dark  | 31               | 48              | 0.65             | FALSE                | Dark     | 63.194  | 0     | 0.018         | NA                  | NA       | NA  |
| MWCNTs     | DR        | 100           | Dark  | 26               | 48              | 0.54             | FALSE                | Dark     | NA      | NA    | NA            | NA                  | NA       | NA  |
| MWCNTs     | DR        | 0             | Light | 43               | 48              | 0.9              | TRUE                 | Light    | 11.513  | 1     | 0             | NA                  | NA       | NA  |
| MWCNTs     | DR        | 10            | Light | 44               | 48              | 0.92             | TRUE                 | Light    | 45.869  | 0.013 | 1.774         | NA                  | NA       | NA  |
| MWCNTs     | DR        | 23.2          | Light | 40               | 48              | 0.83             | TRUE                 | Light    | 53.801  | 0.614 | 1.517         | NA                  | NA       | NA  |
| MWCNTs     | DR        | 50            | Light | 35               | 48              | 0.73             | TRUE                 | Light    | 59.062  | 0     | 3.352         | YES                 | HYP0     | YES |
| MWCNTs     | DR        | 75            | Light | 31               | 48              | 0.65             | FALSE                | Light    | 59.561  | 0.048 | 2.004         | NA                  | NA       | NA  |
| MWCNTs     | DR        | 100           | Light | 26               | 48              | 0.54             | FALSE                | Light    | NA      | NA    | NA            | NA                  | NA       | NA  |
| MWCNTs     | LD        | 0             | Dark  | 46               | 48              | 0.96             | TRUE                 | Dark     | 44.344  | 1     | 0             | NA                  | NA       | NA  |
| MWCNTs     | LD        | 10            | Dark  | 42               | 48              | 0.88             | TRUE                 | Dark     | 42.048  | 0.036 | -0.001        | NA                  | NA       | NA  |
| MWCNTs     | LD        | 23.2          | Dark  | 43               | 48              | 0.9              | TRUE                 | Dark     | 40.787  | 0     | 0.279         | YES                 | HYP0     | YES |
| MWCNTs     | LD        | 50            | Dark  | 40               | 48              | 0.83             | TRUE                 | Dark     | 43.699  | 0     | 0.091         | YES                 | NA       | NA  |
| MWCNTs     | LD        | 75            | Dark  | 39               | 48              | 0.81             | TRUE                 | Dark     | 41.64   | 0     | 0.182         | YES                 | HYP0     | YES |
| MWCNTs     | LD        | 100           | Dark  | 38               | 48              | 0.79             | TRUE                 | Dark     | 39.745  | 0.001 | 0.112         | YES                 | HYP0     | YES |
| MWCNTs     | LD        | 0             | Light | 46               | 48              | 0.96             | TRUE                 | Light    | 22.032  | 1     | 0             | NA                  | NA       | NA  |
| MWCNTs     | LD        | 10            | Light | 42               | 48              | 0.88             | TRUE                 | Light    | 33.871  | 0.048 | -0.413        | NA                  | NA       | NA  |
| MWCNTs     | LD        | 23.2          | Light | 43               | 48              | 0.9              | TRUE                 | Light    | 31.895  | 0.048 | -1.396        | NA                  | NA       | NA  |
| MWCNTs     | LD        | 50            | Light | 40               | 48              | 0.83             | TRUE                 | Light    | 39.558  | 0     | 0.461         | YES                 | HYP0     | YES |
| MWCNTs     | LD        | 75            | Light | 39               | 48              | 0.81             | TRUE                 | Light    | 37.513  | 0.379 | -1.544        | NA                  | NA       | NA  |
| MWCNTs     | LD        | 100           | Light | 38               | 48              | 0.79             | TRUE                 | Light    | 36.618  | 0.74  | -1.618        | NA                  | NA       | NA  |
| MWCNTs     | Standard  | 0             | Dark  | 44               | 48              | 0.92             | TRUE                 | Dark     | 44.815  | 1     | 0             | NA                  | NA       | NA  |
| MWCNTs     | Standard  | 10            | Dark  | 47               | 48              | 0.98             | TRUE                 | Dark     | 47.659  | 0.001 | 0.273         | YES                 | HYP0     | YES |
| MWCNTs     | Standard  | 23.2          | Dark  | 40               | 48              | 0.83             | TRUE                 | Dark     | 44.277  | 0.227 | 0.028         | NA                  | NA       | NA  |
| MWCNTs     | Standard  | 50            | Dark  | 44               | 48              | 0.92             | TRUE                 | Dark     | 44.551  | 0     | 0.095         | YES                 | NA       | NA  |
| MWCNTs     | Standard  | 75            | Dark  | 31               | 48              | 0.65             | FALSE                | Dark     | 49.502  | 0.002 | 0.232         | NA                  | NA       | NA  |
| MWCNTs     | Standard  | 100           | Dark  | 28               | 48              | 0.58             | FALSE                | Dark     | NA      | NA    | NA            | NA                  | NA       | NA  |
| MWCNTs     | Standard  | 0             | Light | 44               | 48              | 0.92             | TRUE                 | Light    | -2.557  | 1     | 0             | NA                  | NA       | NA  |
| MWCNTs     | Standard  | 10            | Light | 47               | 48              | 0.98             | TRUE                 | Light    | 24.438  | 0.74  | 5.381         | NA                  | NA       | NA  |
| MWCNTs     | Standard  | 23.2          | Light | 40               | 48              | 0.83             | TRUE                 | Light    | 34.173  | 0.105 | 6.734         | NA                  | NA       | NA  |
| MWCNTs     | Standard  | 50            | Light | 44               | 48              | 0.92             | TRUE                 | Light    | 36.495  | 0.21  | 2.988         | NA                  | NA       | NA  |
| MWCNTs     | Standard  | 75            | Light | 31               | 48              | 0.65             | FALSE                | Light    | 42.381  | 0.002 | -10.785       | NA                  | NA       | NA  |
| MWCNTs     | Standard  | 100           | Light | 28               | 48              | 0.58             | FALSE                | Light    | NA      | NA    | NA            | NA                  | NA       | NA  |
| Napthalene | Chorion   | 0             | Dark  | 33               | 36              | 0.92             | TRUE                 | Dark     | 32.972  | 1     | 0             | NA                  | NA       | NA  |
| Napthalene | Chorion   | 1             | Dark  | 33               | 36              | 0.92             | TRUE                 | Dark     | 19.94   | 0.015 | -0.15         | NA                  | NA       | NA  |
| Napthalene | Chorion   | 2.54          | Dark  | 34               | 36              | 0.94             | TRUE                 | Dark     | 17.184  | 0.015 | -0.115        | NA                  | NA       | NA  |
| Napthalene | Chorion   | 6.45          | Dark  | 35               | 36              | 0.97             | TRUE                 | Dark     | 21.834  | 0.055 | -0.038        | NA                  | NA       | NA  |
| Napthalene | Chorion   | 16.4          | Dark  | 33               | 36              | 0.92             | TRUE                 | Dark     | 23.752  | 0.023 | 0.492         | NA                  | NA       | NA  |
| Napthalene | Chorion   | 35            | Dark  | 33               | 36              | 0.92             | TRUE                 | Dark     | 26.247  | 0.009 | 0.157         | YES                 | HYP0     | YES |
| Napthalene | Chorion   | 74.8          | Dark  | 33               | 36              | 0.92             | TRUE                 | Dark     | 27.622  | 0.009 | 0.26          | YES                 | HYP0     | YES |
| Napthalene | Chorion   | 100           | Dark  | 35               | 36              | 0.97             | TRUE                 | Dark     | 23.132  | 0.023 | -0.97         | NA                  | NA       | NA  |
| Napthalene | Chorion   | 0             | Light | 33               | 36              | 0.92             | TRUE                 | Light    | 20.175  | 1     | 0             | NA                  | NA       | NA  |
| Napthalene | Chorion   | 1             | Light | 33               | 36              | 0.92             | TRUE                 | Light    | 13.62   | 0.941 | -2.243        | NA                  | NA       | NA  |
| Napthalene | Chorion   | 2.54          | Light | 34               | 36              | 0.94             | TRUE                 | Light    | 12.52   | 0.379 | -1.851        | NA                  | NA       | NA  |
| Napthalene | Chorion   | 6.45          | Light | 35               | 36              | 0.97             | TRUE                 | Light    | 18.66   | 0.013 | 0.364         | NA                  | NA       | NA  |
| Napthalene | Chorion   | 16.4          | Light | 33               | 36              | 0.92             | TRUE                 | Light    | 18.803  | 0.856 | -1.27         | NA                  | NA       | NA  |
| Napthalene | Chorion   | 35            | Light | 33               | 36              | 0.92             | TRUE                 | Light    | 23.819  | 0.941 | 0.214         | NA                  | NA       | NA  |
| Napthalene | Chorion   | 74.8          | Light | 33               | 36              | 0.92             | TRUE                 | Light    | 25.312  | 0     | -0.301        | YES                 | HYP0     | YES |
| Napthalene | Chorion   | 100           | Light | 35               | 36              | 0.97             | TRUE                 | Light    | 24.583  | 0.005 | -1.89         | YES                 | HYP0     | YES |
| Napthalene | DR        | 0             | Dark  | 34               | 36              | 0.94             | TRUE                 | Dark     | 39.323  | 1     | 0             | NA                  | NA       | NA  |
| Napthalene | DR        | 1             | Dark  | 33               | 36              | 0.92             | TRUE                 | Dark     | 33.157  | 0.305 | 0.147         | NA                  | NA       | NA  |
| Napthalene | DR        | 2.54          | Dark  | 32               | 36              | 0.89             | TRUE                 | Dark     | 31.925  | 0.036 | 0.004         | NA                  | NA       | NA  |
| Napthalene | DR        | 6.45          | Dark  | 32               | 36              | 0.89             | TRUE                 | Dark     | 33.494  | 0.009 | 0.056         | YES                 | NA       | NA  |
| Napthalene | DR        | 16.4          | Dark  | 33               | 36              | 0.92             | TRUE                 | Dark     | 34.343  | 0.001 | 0.327         | YES                 | HYP0     | YES |

| Test Agent | Treatment | Concentration | Phase | # viable animals | # total animals | % viable animals | More than 70% viable | interval | AUC     | Pval  | RelativeRatio | Significance p<0.01 | activity | Sig |
|------------|-----------|---------------|-------|------------------|-----------------|------------------|----------------------|----------|---------|-------|---------------|---------------------|----------|-----|
| Napthalene | DR        | 35            | Dark  | 33               | 36              | 0.92             | TRUE                 | Dark     | 34.998  | 0.226 | -0.156        | NA                  | NA       | NA  |
| Napthalene | DR        | 74.8          | Dark  | 33               | 36              | 0.92             | TRUE                 | Dark     | 35.213  | 0.001 | -0.106        | YES                 | HYPO     | YES |
| Napthalene | DR        | 100           | Dark  | 35               | 36              | 0.97             | TRUE                 | Dark     | 31.543  | 0.635 | -0.237        | NA                  | NA       | NA  |
| Napthalene | DR        | 0             | Light | 34               | 36              | 0.94             | TRUE                 | Light    | 31.013  | 1     | 0             | NA                  | NA       | NA  |
| Napthalene | DR        | 1             | Light | 33               | 36              | 0.92             | TRUE                 | Light    | 25.994  | 0.013 | -1.021        | NA                  | NA       | NA  |
| Napthalene | DR        | 2.54          | Light | 32               | 36              | 0.89             | TRUE                 | Light    | 28.747  | 0.856 | -0.642        | NA                  | NA       | NA  |
| Napthalene | DR        | 6.45          | Light | 32               | 36              | 0.89             | TRUE                 | Light    | 31.094  | 0.49  | -0.158        | NA                  | NA       | NA  |
| Napthalene | DR        | 16.4          | Light | 33               | 36              | 0.92             | TRUE                 | Light    | 31.136  | 0.49  | -0.604        | NA                  | NA       | NA  |
| Napthalene | DR        | 35            | Light | 33               | 36              | 0.92             | TRUE                 | Light    | 34.526  | 0     | 0.172         | YES                 | HYPER    | YES |
| Napthalene | DR        | 74.8          | Light | 33               | 36              | 0.92             | TRUE                 | Light    | 34.645  | 0.286 | -0.019        | NA                  | NA       | NA  |
| Napthalene | DR        | 100           | Light | 35               | 36              | 0.97             | TRUE                 | Light    | 31.223  | 0     | -1.795        | YES                 | HYPO     | YES |
| Napthalene | LD        | 0             | Dark  | 31               | 36              | 0.86             | TRUE                 | Dark     | 44.649  | 1     | 0             | NA                  | NA       | NA  |
| Napthalene | LD        | 1             | Dark  | 35               | 36              | 0.97             | TRUE                 | Dark     | 40.141  | 0.002 | 0.032         | YES                 | NA       | NA  |
| Napthalene | LD        | 2.54          | Dark  | 35               | 36              | 0.97             | TRUE                 | Dark     | 40.425  | 0.009 | 0.266         | YES                 | HYPER    | YES |
| Napthalene | LD        | 6.45          | Dark  | 30               | 36              | 0.83             | TRUE                 | Dark     | 37.656  | 0.306 | 0.012         | NA                  | NA       | NA  |
| Napthalene | LD        | 16.4          | Dark  | 31               | 36              | 0.86             | TRUE                 | Dark     | 39.069  | 0.003 | 0.08          | YES                 | NA       | NA  |
| Napthalene | LD        | 35            | Dark  | 30               | 36              | 0.83             | TRUE                 | Dark     | 40.532  | 0.227 | 0.102         | NA                  | NA       | NA  |
| Napthalene | LD        | 74.8          | Dark  | 33               | 36              | 0.92             | TRUE                 | Dark     | 40.243  | 0.306 | -0.05         | NA                  | NA       | NA  |
| Napthalene | LD        | 100           | Dark  | 35               | 36              | 0.97             | TRUE                 | Dark     | 38.978  | 0     | -0.138        | YES                 | HYPO     | YES |
| Napthalene | LD        | 0             | Light | 31               | 36              | 0.86             | TRUE                 | Light    | 26.501  | 1     | 0             | NA                  | NA       | NA  |
| Napthalene | LD        | 1             | Light | 35               | 36              | 0.97             | TRUE                 | Light    | 31.914  | 0.001 | -0.757        | YES                 | HYPO     | YES |
| Napthalene | LD        | 2.54          | Light | 35               | 36              | 0.97             | TRUE                 | Light    | 32.605  | 0     | -0.907        | YES                 | HYPO     | YES |
| Napthalene | LD        | 6.45          | Light | 30               | 36              | 0.83             | TRUE                 | Light    | 33.953  | 0.986 | -1.184        | NA                  | NA       | NA  |
| Napthalene | LD        | 16.4          | Light | 31               | 36              | 0.86             | TRUE                 | Light    | 35.876  | 0.001 | -0.183        | YES                 | HYPO     | YES |
| Napthalene | LD        | 35            | Light | 30               | 36              | 0.83             | TRUE                 | Light    | 37.924  | 0     | -0.001        | YES                 | NA       | NA  |
| Napthalene | LD        | 74.8          | Light | 33               | 36              | 0.92             | TRUE                 | Light    | 38.75   | 0     | -0.345        | YES                 | HYPO     | YES |
| Napthalene | LD        | 100           | Light | 35               | 36              | 0.97             | TRUE                 | Light    | 37.966  | 0.49  | -0.77         | NA                  | NA       | NA  |
| Napthalene | Standard  | 0             | Dark  | 29               | 36              | 0.81             | TRUE                 | Dark     | 19.19   | 1     | 0             | NA                  | NA       | NA  |
| Napthalene | Standard  | 1             | Dark  | 30               | 36              | 0.83             | TRUE                 | Dark     | 35.986  | 0.081 | -0.074        | NA                  | NA       | NA  |
| Napthalene | Standard  | 2.54          | Dark  | 28               | 36              | 0.78             | TRUE                 | Dark     | 36.203  | 0.005 | -0.083        | YES                 | NA       | NA  |
| Napthalene | Standard  | 6.45          | Dark  | 30               | 36              | 0.83             | TRUE                 | Dark     | 37.66   | 0.003 | 0.21          | YES                 | HYPER    | YES |
| Napthalene | Standard  | 16.4          | Dark  | 26               | 36              | 0.72             | TRUE                 | Dark     | 41.834  | 0.116 | 0.177         | NA                  | NA       | NA  |
| Napthalene | Standard  | 35            | Dark  | 28               | 36              | 0.78             | TRUE                 | Dark     | 40.339  | 0     | -0.196        | YES                 | HYPO     | YES |
| Napthalene | Standard  | 74.8          | Dark  | 32               | 36              | 0.89             | TRUE                 | Dark     | 39.522  | 0     | -0.319        | YES                 | HYPO     | YES |
| Napthalene | Standard  | 100           | Dark  | 33               | 36              | 0.92             | TRUE                 | Dark     | 37.661  | 0     | 0.093         | YES                 | NA       | NA  |
| Napthalene | Standard  | 0             | Light | 29               | 36              | 0.81             | TRUE                 | Light    | -34.068 | 1     | 0             | NA                  | NA       | NA  |
| Napthalene | Standard  | 1             | Light | 30               | 36              | 0.83             | TRUE                 | Light    | 25.63   | 0     | -2.13         | YES                 | HYPO     | YES |
| Napthalene | Standard  | 2.54          | Light | 28               | 36              | 0.78             | TRUE                 | Light    | 30.153  | 0.008 | -1.2          | YES                 | HYPO     | YES |
| Napthalene | Standard  | 6.45          | Light | 30               | 36              | 0.83             | TRUE                 | Light    | 30.514  | 0     | -0.894        | YES                 | HYPO     | YES |
| Napthalene | Standard  | 16.4          | Light | 26               | 36              | 0.72             | TRUE                 | Light    | 37.005  | 0     | -1.932        | YES                 | HYPO     | YES |
| Napthalene | Standard  | 35            | Light | 28               | 36              | 0.78             | TRUE                 | Light    | 38.709  | 0     | -1.219        | YES                 | HYPO     | YES |
| Napthalene | Standard  | 74.8          | Light | 32               | 36              | 0.89             | TRUE                 | Light    | 38.765  | 0     | -1.584        | YES                 | HYPO     | YES |
| Napthalene | Standard  | 100           | Light | 33               | 36              | 0.92             | TRUE                 | Light    | 34.892  | 0     | -0.122        | YES                 | HYPO     | YES |
| Permethrin | Chorion   | 0             | Dark  | 32               | 36              | 0.89             | TRUE                 | Dark     | 23.504  | 1     | 0             | NA                  | NA       | NA  |
| Permethrin | Chorion   | 1             | Dark  | 34               | 36              | 0.94             | TRUE                 | Dark     | 42.611  | 0     | 1.122         | YES                 | HYPER    | YES |
| Permethrin | Chorion   | 2.54          | Dark  | 32               | 36              | 0.89             | TRUE                 | Dark     | 43.25   | 0     | 0.96          | YES                 | HYPER    | YES |
| Permethrin | Chorion   | 5             | Dark  | 24               | 36              | 0.67             | FALSE                | Dark     | 52.843  | 0     | 1.454         | NA                  | NA       | NA  |
| Permethrin | Chorion   | 8             | Dark  | 6                | 36              | 0.17             | FALSE                | Dark     | NA      | NA    | NA            | NA                  | NA       | NA  |
| Permethrin | Chorion   | 12            | Dark  | 6                | 36              | 0.17             | FALSE                | Dark     | NA      | NA    | NA            | NA                  | NA       | NA  |
| Permethrin | Chorion   | 16.4          | Dark  | 3                | 36              | 0.08             | FALSE                | Dark     | NA      | NA    | NA            | NA                  | NA       | NA  |
| Permethrin | Chorion   | 35            | Dark  | 0                | 36              | 0                | FALSE                | Dark     | NA      | NA    | NA            | NA                  | NA       | NA  |
| Permethrin | Chorion   | 0             | Light | 32               | 36              | 0.89             | TRUE                 | Light    | 11.753  | 1     | 0             | NA                  | NA       | NA  |
| Permethrin | Chorion   | 1             | Light | 34               | 36              | 0.94             | TRUE                 | Light    | 31.88   | 0     | 3.138         | YES                 | HYPER    | YES |
| Permethrin | Chorion   | 2.54          | Light | 32               | 36              | 0.89             | TRUE                 | Light    | 38.081  | 0     | 0.698         | YES                 | HYPER    | YES |
| Permethrin | Chorion   | 5             | Light | 24               | 36              | 0.67             | FALSE                | Light    | 48.033  | 0     | 5.529         | NA                  | NA       | NA  |
| Permethrin | Chorion   | 8             | Light | 6                | 36              | 0.17             | FALSE                | Light    | NA      | NA    | NA            | NA                  | NA       | NA  |
| Permethrin | Chorion   | 12            | Light | 6                | 36              | 0.17             | FALSE                | Light    | NA      | NA    | NA            | NA                  | NA       | NA  |
| Permethrin | Chorion   | 16.4          | Light | 3                | 36              | 0.08             | FALSE                | Light    | NA      | NA    | NA            | NA                  | NA       | NA  |
| Permethrin | Chorion   | 35            | Light | 0                | 36              | 0                | FALSE                | Light    | NA      | NA    | NA            | NA                  | NA       | NA  |
| Permethrin | DR        | 0             | Dark  | 31               | 36              | 0.86             | TRUE                 | Dark     | 37.035  | 1     | 0             | NA                  | NA       | NA  |
| Permethrin | DR        | 1             | Dark  | 28               | 36              | 0.78             | TRUE                 | Dark     | 51.448  | 0.402 | 0.213         | NA                  | NA       | NA  |
| Permethrin | DR        | 2.54          | Dark  | 9                | 36              | 0.25             | FALSE                | Dark     | NA      | NA    | NA            | NA                  | NA       | NA  |
| Permethrin | DR        | 5             | Dark  | 6                | 36              | 0.17             | FALSE                | Dark     | NA      | NA    | NA            | NA                  | NA       | NA  |
| Permethrin | DR        | 8             | Dark  | 1                | 36              | 0.03             | FALSE                | Dark     | NA      | NA    | NA            | NA                  | NA       | NA  |
| Permethrin | DR        | 12            | Dark  | 1                | 36              | 0.03             | FALSE                | Dark     | NA      | NA    | NA            | NA                  | NA       | NA  |

| Test Agent | Treatment | Concentration | Phase | # viable animals | # total animals | % viable animals | More than 70% viable | interval | AUC    | Pval  | RelativeRatio | Significance p<0.01 | activity | Sig |
|------------|-----------|---------------|-------|------------------|-----------------|------------------|----------------------|----------|--------|-------|---------------|---------------------|----------|-----|
| Permethrin | DR        | 16.4          | Dark  | 1                | 36              | 0.03             | FALSE                | Dark     | NA     | NA    | NA            | NA                  | NA       | NA  |
| Permethrin | DR        | 35            | Dark  | 1                | 36              | 0.03             | FALSE                | Dark     | NA     | NA    | NA            | NA                  | NA       | NA  |
| Permethrin | DR        | 0             | Light | 31               | 36              | 0.86             | TRUE                 | Light    | 12.907 | 1     | 0             | NA                  | NA       | NA  |
| Permethrin | DR        | 1             | Light | 28               | 36              | 0.78             | TRUE                 | Light    | 43.875 | 0     | 3.459         | YES                 | HYPERS   | YES |
| Permethrin | DR        | 2.54          | Light | 9                | 36              | 0.25             | FALSE                | Light    | NA     | NA    | NA            | NA                  | NA       | NA  |
| Permethrin | DR        | 5             | Light | 6                | 36              | 0.17             | FALSE                | Light    | NA     | NA    | NA            | NA                  | NA       | NA  |
| Permethrin | DR        | 8             | Light | 1                | 36              | 0.03             | FALSE                | Light    | NA     | NA    | NA            | NA                  | NA       | NA  |
| Permethrin | DR        | 12            | Light | 1                | 36              | 0.03             | FALSE                | Light    | NA     | NA    | NA            | NA                  | NA       | NA  |
| Permethrin | DR        | 16.4          | Light | 1                | 36              | 0.03             | FALSE                | Light    | NA     | NA    | NA            | NA                  | NA       | NA  |
| Permethrin | DR        | 35            | Light | 1                | 36              | 0.03             | FALSE                | Light    | NA     | NA    | NA            | NA                  | NA       | NA  |
| Permethrin | LD        | 0             | Dark  | 32               | 36              | 0.89             | TRUE                 | Dark     | 63.903 | 1     | 0             | NA                  | NA       | NA  |
| Permethrin | LD        | 1             | Dark  | 28               | 36              | 0.78             | TRUE                 | Dark     | 54.024 | 0.402 | -0.13         | NA                  | NA       | NA  |
| Permethrin | LD        | 2.54          | Dark  | 26               | 36              | 0.72             | TRUE                 | Dark     | 55.131 | 0.402 | -0.213        | NA                  | NA       | NA  |
| Permethrin | LD        | 5             | Dark  | 27               | 36              | 0.75             | TRUE                 | Dark     | 52.322 | 0.227 | -0.12         | NA                  | NA       | NA  |
| Permethrin | LD        | 8             | Dark  | 25               | 36              | 0.69             | FALSE                | Dark     | 54.285 | 0     | 0.119         | NA                  | NA       | NA  |
| Permethrin | LD        | 12            | Dark  | 17               | 36              | 0.47             | FALSE                | Dark     | NA     | NA    | NA            | NA                  | NA       | NA  |
| Permethrin | LD        | 16.4          | Dark  | 12               | 36              | 0.33             | FALSE                | Dark     | NA     | NA    | NA            | NA                  | NA       | NA  |
| Permethrin | LD        | 35            | Dark  | 0                | 36              | 0                | FALSE                | Dark     | NA     | NA    | NA            | NA                  | NA       | NA  |
| Permethrin | LD        | 0             | Light | 32               | 36              | 0.89             | TRUE                 | Light    | 61.51  | 1     | 0             | NA                  | NA       | NA  |
| Permethrin | LD        | 1             | Light | 28               | 36              | 0.78             | TRUE                 | Light    | 52.81  | 0.007 | -0.502        | YES                 | HYPERS   | YES |
| Permethrin | LD        | 2.54          | Light | 26               | 36              | 0.72             | TRUE                 | Light    | 55.717 | 0.381 | 0.016         | NA                  | NA       | NA  |
| Permethrin | LD        | 5             | Light | 27               | 36              | 0.75             | TRUE                 | Light    | 51.461 | 0.858 | -0.521        | NA                  | NA       | NA  |
| Permethrin | LD        | 8             | Light | 25               | 36              | 0.69             | FALSE                | Light    | 52.074 | 0     | -0.186        | NA                  | NA       | NA  |
| Permethrin | LD        | 12            | Light | 17               | 36              | 0.47             | FALSE                | Light    | NA     | NA    | NA            | NA                  | NA       | NA  |
| Permethrin | LD        | 16.4          | Light | 12               | 36              | 0.33             | FALSE                | Light    | NA     | NA    | NA            | NA                  | NA       | NA  |
| Permethrin | LD        | 35            | Light | 0                | 36              | 0                | FALSE                | Light    | NA     | NA    | NA            | NA                  | NA       | NA  |
| Permethrin | Standard  | 0             | Dark  | 30               | 36              | 0.83             | TRUE                 | Dark     | 25.377 | 1     | 0             | NA                  | NA       | NA  |
| Permethrin | Standard  | 1             | Dark  | 25               | 36              | 0.69             | FALSE                | Dark     | 48.58  | 0     | 0.463         | NA                  | NA       | NA  |
| Permethrin | Standard  | 2.54          | Dark  | 26               | 36              | 0.72             | TRUE                 | Dark     | 38.66  | 0     | 0.353         | YES                 | HYPERS   | YES |
| Permethrin | Standard  | 5             | Dark  | 23               | 36              | 0.64             | FALSE                | Dark     | 36.331 | 0.006 | -0.401        | NA                  | NA       | NA  |
| Permethrin | Standard  | 8             | Dark  | 21               | 36              | 0.58             | FALSE                | Dark     | NA     | NA    | NA            | NA                  | NA       | NA  |
| Permethrin | Standard  | 12            | Dark  | 7                | 36              | 0.19             | FALSE                | Dark     | NA     | NA    | NA            | NA                  | NA       | NA  |
| Permethrin | Standard  | 16.4          | Dark  | 9                | 36              | 0.25             | FALSE                | Dark     | NA     | NA    | NA            | NA                  | NA       | NA  |
| Permethrin | Standard  | 35            | Dark  | 1                | 36              | 0.03             | FALSE                | Dark     | NA     | NA    | NA            | NA                  | NA       | NA  |
| Permethrin | Standard  | 0             | Light | 30               | 36              | 0.83             | TRUE                 | Light    | -0.623 | 1     | 0             | NA                  | NA       | NA  |
| Permethrin | Standard  | 1             | Light | 25               | 36              | 0.69             | FALSE                | Light    | 39.717 | 0     | -110.856      | NA                  | NA       | NA  |
| Permethrin | Standard  | 2.54          | Light | 26               | 36              | 0.72             | TRUE                 | Light    | 32.489 | 0.032 | 50.196        | NA                  | NA       | NA  |
| Permethrin | Standard  | 5             | Light | 23               | 36              | 0.64             | FALSE                | Light    | 37.123 | 0.74  | -45.811       | NA                  | NA       | NA  |
| Permethrin | Standard  | 8             | Light | 21               | 36              | 0.58             | FALSE                | Light    | NA     | NA    | NA            | NA                  | NA       | NA  |
| Permethrin | Standard  | 12            | Light | 7                | 36              | 0.19             | FALSE                | Light    | NA     | NA    | NA            | NA                  | NA       | NA  |
| Permethrin | Standard  | 16.4          | Light | 9                | 36              | 0.25             | FALSE                | Light    | NA     | NA    | NA            | NA                  | NA       | NA  |
| Permethrin | Standard  | 35            | Light | 1                | 36              | 0.03             | FALSE                | Light    | NA     | NA    | NA            | NA                  | NA       | NA  |
| Pyrene     | Chorion   | 0             | Dark  | 35               | 36              | 0.97             | TRUE                 | Dark     | 43.395 | 1     | 0             | NA                  | NA       | NA  |
| Pyrene     | Chorion   | 1             | Dark  | 34               | 36              | 0.94             | TRUE                 | Dark     | 46.059 | 0.001 | 0.271         | YES                 | HYPERS   | YES |
| Pyrene     | Chorion   | 5             | Dark  | 34               | 36              | 0.94             | TRUE                 | Dark     | 45.278 | 0.023 | 0.003         | NA                  | NA       | NA  |
| Pyrene     | Chorion   | 16.5          | Dark  | 33               | 36              | 0.92             | TRUE                 | Dark     | 43.186 | 0     | -0.227        | YES                 | HYPERS   | YES |
| Pyrene     | Chorion   | 30            | Dark  | 36               | 36              | 1                | TRUE                 | Dark     | 38.102 | 0     | -1.15         | YES                 | HYPERS   | YES |
| Pyrene     | Chorion   | 50            | Dark  | 31               | 36              | 0.86             | TRUE                 | Dark     | 40.865 | 0     | -0.609        | YES                 | HYPERS   | YES |
| Pyrene     | Chorion   | 65            | Dark  | 13               | 36              | 0.36             | FALSE                | Dark     | NA     | NA    | NA            | NA                  | NA       | NA  |
| Pyrene     | Chorion   | 100           | Dark  | 4                | 36              | 0.11             | FALSE                | Dark     | NA     | NA    | NA            | NA                  | NA       | NA  |
| Pyrene     | Chorion   | 0             | Light | 35               | 36              | 0.97             | TRUE                 | Light    | 14.558 | 1     | 0             | NA                  | NA       | NA  |
| Pyrene     | Chorion   | 1             | Light | 34               | 36              | 0.94             | TRUE                 | Light    | 30.818 | 0.21  | -0.611        | NA                  | NA       | NA  |
| Pyrene     | Chorion   | 5             | Light | 34               | 36              | 0.94             | TRUE                 | Light    | 39.846 | 0.105 | 0.03          | NA                  | NA       | NA  |
| Pyrene     | Chorion   | 16.5          | Light | 33               | 36              | 0.92             | TRUE                 | Light    | 41.382 | 0.74  | 0.237         | NA                  | NA       | NA  |
| Pyrene     | Chorion   | 30            | Light | 36               | 36              | 1                | TRUE                 | Light    | 43.538 | 0     | 2.184         | YES                 | HYPERS   | YES |
| Pyrene     | Chorion   | 50            | Light | 31               | 36              | 0.86             | TRUE                 | Light    | 42.011 | 0     | 4.572         | YES                 | HYPERS   | YES |
| Pyrene     | Chorion   | 65            | Light | 13               | 36              | 0.36             | FALSE                | Light    | NA     | NA    | NA            | NA                  | NA       | NA  |
| Pyrene     | Chorion   | 100           | Light | 4                | 36              | 0.11             | FALSE                | Light    | NA     | NA    | NA            | NA                  | NA       | NA  |
| Pyrene     | DR        | 0             | Dark  | 30               | 36              | 0.83             | TRUE                 | Dark     | 49.148 | 1     | 0             | NA                  | NA       | NA  |
| Pyrene     | DR        | 1             | Dark  | 33               | 36              | 0.92             | TRUE                 | Dark     | 51.189 | 0     | 0.17          | YES                 | HYPERS   | YES |
| Pyrene     | DR        | 5             | Dark  | 33               | 36              | 0.92             | TRUE                 | Dark     | 42.933 | 0     | -0.759        | YES                 | HYPERS   | YES |
| Pyrene     | DR        | 16.5          | Dark  | 3                | 36              | 0.08             | FALSE                | Dark     | NA     | NA    | NA            | NA                  | NA       | NA  |
| Pyrene     | DR        | 30            | Dark  | 2                | 36              | 0.06             | FALSE                | Dark     | NA     | NA    | NA            | NA                  | NA       | NA  |
| Pyrene     | DR        | 50            | Dark  | 3                | 36              | 0.08             | FALSE                | Dark     | NA     | NA    | NA            | NA                  | NA       | NA  |
| Pyrene     | DR        | 65            | Dark  | 2                | 36              | 0.06             | FALSE                | Dark     | NA     | NA    | NA            | NA                  | NA       | NA  |

| Test Agent | Treatment | Concentration | Phase | # viable animals | # total animals | % viable animals | More than 70% viable | interval | AUC    | Pval  | RelativeRatio | Significance p<0.01 | activity | Sig |
|------------|-----------|---------------|-------|------------------|-----------------|------------------|----------------------|----------|--------|-------|---------------|---------------------|----------|-----|
| Pyrene     | DR        | 100           | Dark  | 0                | 36              | 0                | FALSE                | Dark     | NA     | NA    | NA            | NA                  | NA       | NA  |
| Pyrene     | DR        | 0             | Light | 30               | 36              | 0.83             | TRUE                 | Light    | 26.658 | 1     | 0             | NA                  | NA       | NA  |
| Pyrene     | DR        | 1             | Light | 33               | 36              | 0.92             | TRUE                 | Light    | 40.308 | 0.072 | -0.151        | NA                  | NA       | NA  |
| Pyrene     | DR        | 5             | Light | 33               | 36              | 0.92             | TRUE                 | Light    | 48.072 | 0     | 0.336         | YES                 | HYPHER   | YES |
| Pyrene     | DR        | 16.5          | Light | 3                | 36              | 0.08             | FALSE                | Light    | NA     | NA    | NA            | NA                  | NA       | NA  |
| Pyrene     | DR        | 30            | Light | 2                | 36              | 0.06             | FALSE                | Light    | NA     | NA    | NA            | NA                  | NA       | NA  |
| Pyrene     | DR        | 50            | Light | 3                | 36              | 0.08             | FALSE                | Light    | NA     | NA    | NA            | NA                  | NA       | NA  |
| Pyrene     | DR        | 65            | Light | 2                | 36              | 0.06             | FALSE                | Light    | NA     | NA    | NA            | NA                  | NA       | NA  |
| Pyrene     | DR        | 100           | Light | 0                | 36              | 0                | FALSE                | Light    | NA     | NA    | NA            | NA                  | NA       | NA  |
| Pyrene     | LD        | 0             | Dark  | 32               | 36              | 0.89             | TRUE                 | Dark     | 47.349 | 1     | 0             | NA                  | NA       | NA  |
| Pyrene     | LD        | 1             | Dark  | 31               | 36              | 0.86             | TRUE                 | Dark     | 51.385 | 0.402 | 0.05          | NA                  | NA       | NA  |
| Pyrene     | LD        | 5             | Dark  | 36               | 36              | 1                | TRUE                 | Dark     | 53.396 | 0.003 | 0             | YES                 | NA       | NA  |
| Pyrene     | LD        | 16.5          | Dark  | 32               | 36              | 0.89             | TRUE                 | Dark     | 43.816 | 0.009 | 0.227         | YES                 | HYPHER   | YES |
| Pyrene     | LD        | 30            | Dark  | 29               | 36              | 0.81             | TRUE                 | Dark     | 40.53  | 0.003 | -0.304        | YES                 | HYPHO    | YES |
| Pyrene     | LD        | 50            | Dark  | 21               | 36              | 0.58             | FALSE                | Dark     | NA     | NA    | NA            | NA                  | NA       | NA  |
| Pyrene     | LD        | 65            | Dark  | 9                | 36              | 0.25             | FALSE                | Dark     | NA     | NA    | NA            | NA                  | NA       | NA  |
| Pyrene     | LD        | 100           | Dark  | 0                | 36              | 0                | FALSE                | Dark     | NA     | NA    | NA            | NA                  | NA       | NA  |
| Pyrene     | LD        | 0             | Light | 32               | 36              | 0.89             | TRUE                 | Light    | 37.972 | 1     | 0             | NA                  | NA       | NA  |
| Pyrene     | LD        | 1             | Light | 31               | 36              | 0.86             | TRUE                 | Light    | 48.657 | 0     | 0.35          | YES                 | HYPHER   | YES |
| Pyrene     | LD        | 5             | Light | 36               | 36              | 1                | TRUE                 | Light    | 52.735 | 0.032 | 0.531         | NA                  | NA       | NA  |
| Pyrene     | LD        | 16.5          | Light | 32               | 36              | 0.89             | TRUE                 | Light    | 40.131 | 0.072 | -2.039        | NA                  | NA       | NA  |
| Pyrene     | LD        | 30            | Light | 29               | 36              | 0.81             | TRUE                 | Light    | 40.644 | 0     | -0.598        | YES                 | HYPHO    | YES |
| Pyrene     | LD        | 50            | Light | 21               | 36              | 0.58             | FALSE                | Light    | NA     | NA    | NA            | NA                  | NA       | NA  |
| Pyrene     | LD        | 65            | Light | 9                | 36              | 0.25             | FALSE                | Light    | NA     | NA    | NA            | NA                  | NA       | NA  |
| Pyrene     | LD        | 100           | Light | 0                | 36              | 0                | FALSE                | Light    | NA     | NA    | NA            | NA                  | NA       | NA  |
| Pyrene     | Standard  | 0             | Dark  | 34               | 36              | 0.94             | TRUE                 | Dark     | 43.378 | 1     | 0             | NA                  | NA       | NA  |
| Pyrene     | Standard  | 1             | Dark  | 35               | 36              | 0.97             | TRUE                 | Dark     | 43.558 | 0.001 | 0.124         | YES                 | HYPHER   | YES |
| Pyrene     | Standard  | 5             | Dark  | 35               | 36              | 0.97             | TRUE                 | Dark     | 39.585 | 0.005 | 0.083         | YES                 | NA       | NA  |
| Pyrene     | Standard  | 16.5          | Dark  | 29               | 36              | 0.81             | TRUE                 | Dark     | 33.09  | 0     | -0.451        | YES                 | HYPHO    | YES |
| Pyrene     | Standard  | 30            | Dark  | 31               | 36              | 0.86             | TRUE                 | Dark     | 30.915 | 0     | -0.195        | YES                 | HYPHO    | YES |
| Pyrene     | Standard  | 50            | Dark  | 17               | 36              | 0.47             | FALSE                | Dark     | NA     | NA    | NA            | NA                  | NA       | NA  |
| Pyrene     | Standard  | 65            | Dark  | 8                | 36              | 0.22             | FALSE                | Dark     | NA     | NA    | NA            | NA                  | NA       | NA  |
| Pyrene     | Standard  | 100           | Dark  | 2                | 36              | 0.06             | FALSE                | Dark     | NA     | NA    | NA            | NA                  | NA       | NA  |
| Pyrene     | Standard  | 0             | Light | 34               | 36              | 0.94             | TRUE                 | Light    | 18.348 | 1     | 0             | NA                  | NA       | NA  |
| Pyrene     | Standard  | 1             | Light | 35               | 36              | 0.97             | TRUE                 | Light    | 32.45  | 0.005 | -0.423        | YES                 | HYPHO    | YES |
| Pyrene     | Standard  | 5             | Light | 35               | 36              | 0.97             | TRUE                 | Light    | 32.679 | 0.002 | -1.591        | YES                 | HYPHO    | YES |
| Pyrene     | Standard  | 16.5          | Light | 29               | 36              | 0.81             | TRUE                 | Light    | 32.452 | 0     | -1.564        | YES                 | HYPHO    | YES |
| Pyrene     | Standard  | 30            | Light | 31               | 36              | 0.86             | TRUE                 | Light    | 28.235 | 0.02  | -1.578        | NA                  | NA       | NA  |
| Pyrene     | Standard  | 50            | Light | 17               | 36              | 0.47             | FALSE                | Light    | NA     | NA    | NA            | NA                  | NA       | NA  |
| Pyrene     | Standard  | 65            | Light | 8                | 36              | 0.22             | FALSE                | Light    | NA     | NA    | NA            | NA                  | NA       | NA  |
| Pyrene     | Standard  | 100           | Light | 2                | 36              | 0.06             | FALSE                | Light    | NA     | NA    | NA            | NA                  | NA       | NA  |
| Retene     | Chorion   | 0             | Dark  | 32               | 36              | 0.89             | TRUE                 | Dark     | 26.38  | 1     | 0             | NA                  | NA       | NA  |
| Retene     | Chorion   | 1             | Dark  | 34               | 36              | 0.94             | TRUE                 | Dark     | 23.81  | 0.055 | -0.561        | NA                  | NA       | NA  |
| Retene     | Chorion   | 5             | Dark  | 34               | 36              | 0.94             | TRUE                 | Dark     | 36.307 | 0.305 | 0.715         | NA                  | NA       | NA  |
| Retene     | Chorion   | 20            | Dark  | 31               | 36              | 0.86             | TRUE                 | Dark     | 29.779 | 0     | -1.17         | YES                 | HYPHO    | YES |
| Retene     | Chorion   | 30            | Dark  | 26               | 36              | 0.72             | TRUE                 | Dark     | 28.292 | 0     | 0.785         | YES                 | HYPHER   | YES |
| Retene     | Chorion   | 45            | Dark  | 8                | 36              | 0.22             | FALSE                | Dark     | NA     | NA    | NA            | NA                  | NA       | NA  |
| Retene     | Chorion   | 65            | Dark  | 4                | 36              | 0.11             | FALSE                | Dark     | NA     | NA    | NA            | NA                  | NA       | NA  |
| Retene     | Chorion   | 100           | Dark  | 1                | 36              | 0.03             | FALSE                | Dark     | NA     | NA    | NA            | NA                  | NA       | NA  |
| Retene     | Chorion   | 0             | Light | 32               | 36              | 0.89             | TRUE                 | Light    | 12.63  | 1     | 0             | NA                  | NA       | NA  |
| Retene     | Chorion   | 1             | Light | 34               | 36              | 0.94             | TRUE                 | Light    | 25.878 | 0.02  | 0.969         | NA                  | NA       | NA  |
| Retene     | Chorion   | 5             | Light | 34               | 36              | 0.94             | TRUE                 | Light    | 29.804 | 0.151 | 3.258         | NA                  | NA       | NA  |
| Retene     | Chorion   | 20            | Light | 31               | 36              | 0.86             | TRUE                 | Light    | 35.006 | 0     | 1.154         | YES                 | HYPHER   | YES |
| Retene     | Chorion   | 30            | Light | 26               | 36              | 0.72             | TRUE                 | Light    | 23.475 | 0     | -3.134        | YES                 | HYPHO    | YES |
| Retene     | Chorion   | 45            | Light | 8                | 36              | 0.22             | FALSE                | Light    | NA     | NA    | NA            | NA                  | NA       | NA  |
| Retene     | Chorion   | 65            | Light | 4                | 36              | 0.11             | FALSE                | Light    | NA     | NA    | NA            | NA                  | NA       | NA  |
| Retene     | Chorion   | 100           | Light | 1                | 36              | 0.03             | FALSE                | Light    | NA     | NA    | NA            | NA                  | NA       | NA  |
| Retene     | DR        | 0             | Dark  | 30               | 36              | 0.83             | TRUE                 | Dark     | 9.949  | 1     | 0             | NA                  | NA       | NA  |
| Retene     | DR        | 1             | Dark  | 23               | 36              | 0.64             | FALSE                | Dark     | 32.963 | 0.762 | 0.272         | NA                  | NA       | NA  |
| Retene     | DR        | 5             | Dark  | 26               | 36              | 0.72             | TRUE                 | Dark     | 37.365 | 0.116 | 0.523         | NA                  | NA       | NA  |
| Retene     | DR        | 20            | Dark  | 0                | 36              | 0                | FALSE                | Dark     | NA     | NA    | NA            | NA                  | NA       | NA  |
| Retene     | DR        | 30            | Dark  | 0                | 36              | 0                | FALSE                | Dark     | NA     | NA    | NA            | NA                  | NA       | NA  |
| Retene     | DR        | 45            | Dark  | 0                | 36              | 0                | FALSE                | Dark     | NA     | NA    | NA            | NA                  | NA       | NA  |
| Retene     | DR        | 65            | Dark  | 0                | 36              | 0                | FALSE                | Dark     | NA     | NA    | NA            | NA                  | NA       | NA  |
| Retene     | DR        | 100           | Dark  | 0                | 36              | 0                | FALSE                | Dark     | NA     | NA    | NA            | NA                  | NA       | NA  |

| Test Agent | Treatment | Concentration | Phase | # viable animals | # total animals | % viable animals | More than 70% viable | interval | AUC     | Pval  | RelativeRatio | Significance p<0.01 | activity | Sig |
|------------|-----------|---------------|-------|------------------|-----------------|------------------|----------------------|----------|---------|-------|---------------|---------------------|----------|-----|
| Retene     | DR        | 0             | Light | 30               | 36              | 0.83             | TRUE                 | Light    | -39.787 | 1     | 0             | NA                  | NA       | NA  |
| Retene     | DR        | 1             | Light | 23               | 36              | 0.64             | FALSE                | Light    | 18.635  | 0     | -1.905        | NA                  | NA       | NA  |
| Retene     | DR        | 5             | Light | 26               | 36              | 0.72             | TRUE                 | Light    | 26.66   | 0.005 | -1.036        | YES                 | HYPO     | YES |
| Retene     | DR        | 20            | Light | 0                | 36              | 0                | FALSE                | Light    | NA      | NA    | NA            | NA                  | NA       | NA  |
| Retene     | DR        | 30            | Light | 0                | 36              | 0                | FALSE                | Light    | NA      | NA    | NA            | NA                  | NA       | NA  |
| Retene     | DR        | 45            | Light | 0                | 36              | 0                | FALSE                | Light    | NA      | NA    | NA            | NA                  | NA       | NA  |
| Retene     | DR        | 65            | Light | 0                | 36              | 0                | FALSE                | Light    | NA      | NA    | NA            | NA                  | NA       | NA  |
| Retene     | DR        | 100           | Light | 0                | 36              | 0                | FALSE                | Light    | NA      | NA    | NA            | NA                  | NA       | NA  |
| Retene     | LD        | 0             | Dark  | 29               | 36              | 0.81             | TRUE                 | Dark     | 56.769  | 1     | 0             | NA                  | NA       | NA  |
| Retene     | LD        | 1             | Dark  | 28               | 36              | 0.78             | TRUE                 | Dark     | 47.441  | 0.001 | -0.047        | YES                 | NA       | NA  |
| Retene     | LD        | 5             | Dark  | 23               | 36              | 0.64             | FALSE                | Dark     | 54.122  | 0.515 | 0.151         | NA                  | NA       | NA  |
| Retene     | LD        | 20            | Dark  | 21               | 36              | 0.58             | FALSE                | Dark     | NA      | NA    | NA            | NA                  | NA       | NA  |
| Retene     | LD        | 30            | Dark  | 6                | 36              | 0.17             | FALSE                | Dark     | NA      | NA    | NA            | NA                  | NA       | NA  |
| Retene     | LD        | 45            | Dark  | 2                | 36              | 0.06             | FALSE                | Dark     | NA      | NA    | NA            | NA                  | NA       | NA  |
| Retene     | LD        | 65            | Dark  | 0                | 36              | 0                | FALSE                | Dark     | NA      | NA    | NA            | NA                  | NA       | NA  |
| Retene     | LD        | 100           | Dark  | 0                | 36              | 0                | FALSE                | Dark     | NA      | NA    | NA            | NA                  | NA       | NA  |
| Retene     | LD        | 0             | Light | 29               | 36              | 0.81             | TRUE                 | Light    | 60.958  | 1     | 0             | NA                  | NA       | NA  |
| Retene     | LD        | 1             | Light | 28               | 36              | 0.78             | TRUE                 | Light    | 46.556  | 0     | -0.571        | YES                 | HYPO     | YES |
| Retene     | LD        | 5             | Light | 23               | 36              | 0.64             | FALSE                | Light    | 52.842  | 0.614 | 0.221         | NA                  | NA       | NA  |
| Retene     | LD        | 20            | Light | 21               | 36              | 0.58             | FALSE                | Light    | NA      | NA    | NA            | NA                  | NA       | NA  |
| Retene     | LD        | 30            | Light | 6                | 36              | 0.17             | FALSE                | Light    | NA      | NA    | NA            | NA                  | NA       | NA  |
| Retene     | LD        | 45            | Light | 2                | 36              | 0.06             | FALSE                | Light    | NA      | NA    | NA            | NA                  | NA       | NA  |
| Retene     | LD        | 65            | Light | 0                | 36              | 0                | FALSE                | Light    | NA      | NA    | NA            | NA                  | NA       | NA  |
| Retene     | LD        | 100           | Light | 0                | 36              | 0                | FALSE                | Light    | NA      | NA    | NA            | NA                  | NA       | NA  |
| Retene     | Standard  | 0             | Dark  | 31               | 36              | 0.86             | TRUE                 | Dark     | 41.785  | 1     | 0             | NA                  | NA       | NA  |
| Retene     | Standard  | 1             | Dark  | 22               | 36              | 0.61             | FALSE                | Dark     | 40.038  | 0.635 | -0.241        | NA                  | NA       | NA  |
| Retene     | Standard  | 5             | Dark  | 29               | 36              | 0.81             | TRUE                 | Dark     | 45.084  | 0.015 | 0.932         | NA                  | NA       | NA  |
| Retene     | Standard  | 20            | Dark  | 20               | 36              | 0.56             | FALSE                | Dark     | NA      | NA    | NA            | NA                  | NA       | NA  |
| Retene     | Standard  | 30            | Dark  | 5                | 36              | 0.14             | FALSE                | Dark     | NA      | NA    | NA            | NA                  | NA       | NA  |
| Retene     | Standard  | 45            | Dark  | 0                | 36              | 0                | FALSE                | Dark     | NA      | NA    | NA            | NA                  | NA       | NA  |
| Retene     | Standard  | 65            | Dark  | 0                | 36              | 0                | FALSE                | Dark     | NA      | NA    | NA            | NA                  | NA       | NA  |
| Retene     | Standard  | 100           | Dark  | 0                | 36              | 0                | FALSE                | Dark     | NA      | NA    | NA            | NA                  | NA       | NA  |
| Retene     | Standard  | 0             | Light | 31               | 36              | 0.86             | TRUE                 | Light    | 37.346  | 1     | 0             | NA                  | NA       | NA  |
| Retene     | Standard  | 1             | Light | 22               | 36              | 0.61             | FALSE                | Light    | 41.686  | 0     | 0.111         | NA                  | NA       | NA  |
| Retene     | Standard  | 5             | Light | 29               | 36              | 0.81             | TRUE                 | Light    | 36.241  | 0     | -0.436        | YES                 | HYPO     | YES |
| Retene     | Standard  | 20            | Light | 20               | 36              | 0.56             | FALSE                | Light    | NA      | NA    | NA            | NA                  | NA       | NA  |
| Retene     | Standard  | 30            | Light | 5                | 36              | 0.14             | FALSE                | Light    | NA      | NA    | NA            | NA                  | NA       | NA  |
| Retene     | Standard  | 45            | Light | 0                | 36              | 0                | FALSE                | Light    | NA      | NA    | NA            | NA                  | NA       | NA  |
| Retene     | Standard  | 65            | Light | 0                | 36              | 0                | FALSE                | Light    | NA      | NA    | NA            | NA                  | NA       | NA  |
| Retene     | Standard  | 100           | Light | 0                | 36              | 0                | FALSE                | Light    | NA      | NA    | NA            | NA                  | NA       | NA  |

# Abamectin

## Chorion on

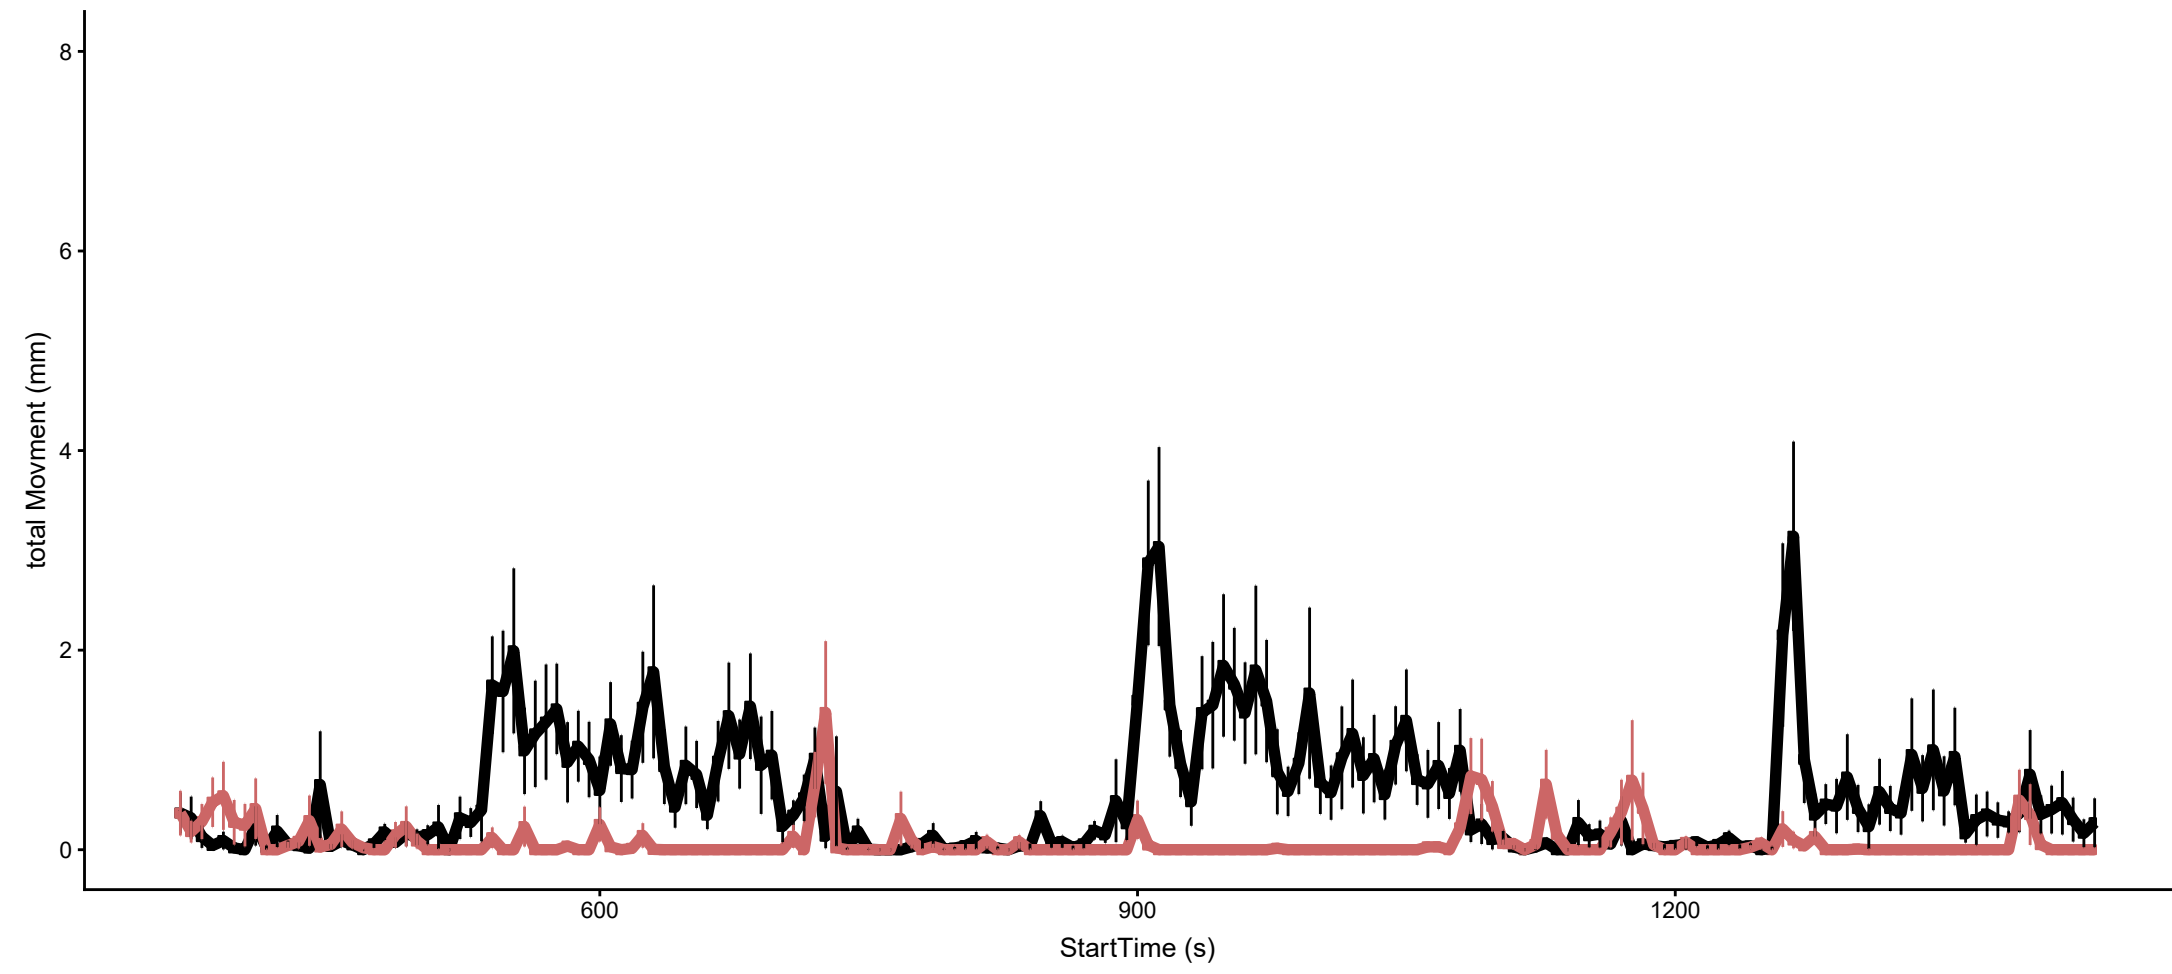

conc 0 0.1

## Daily renewal

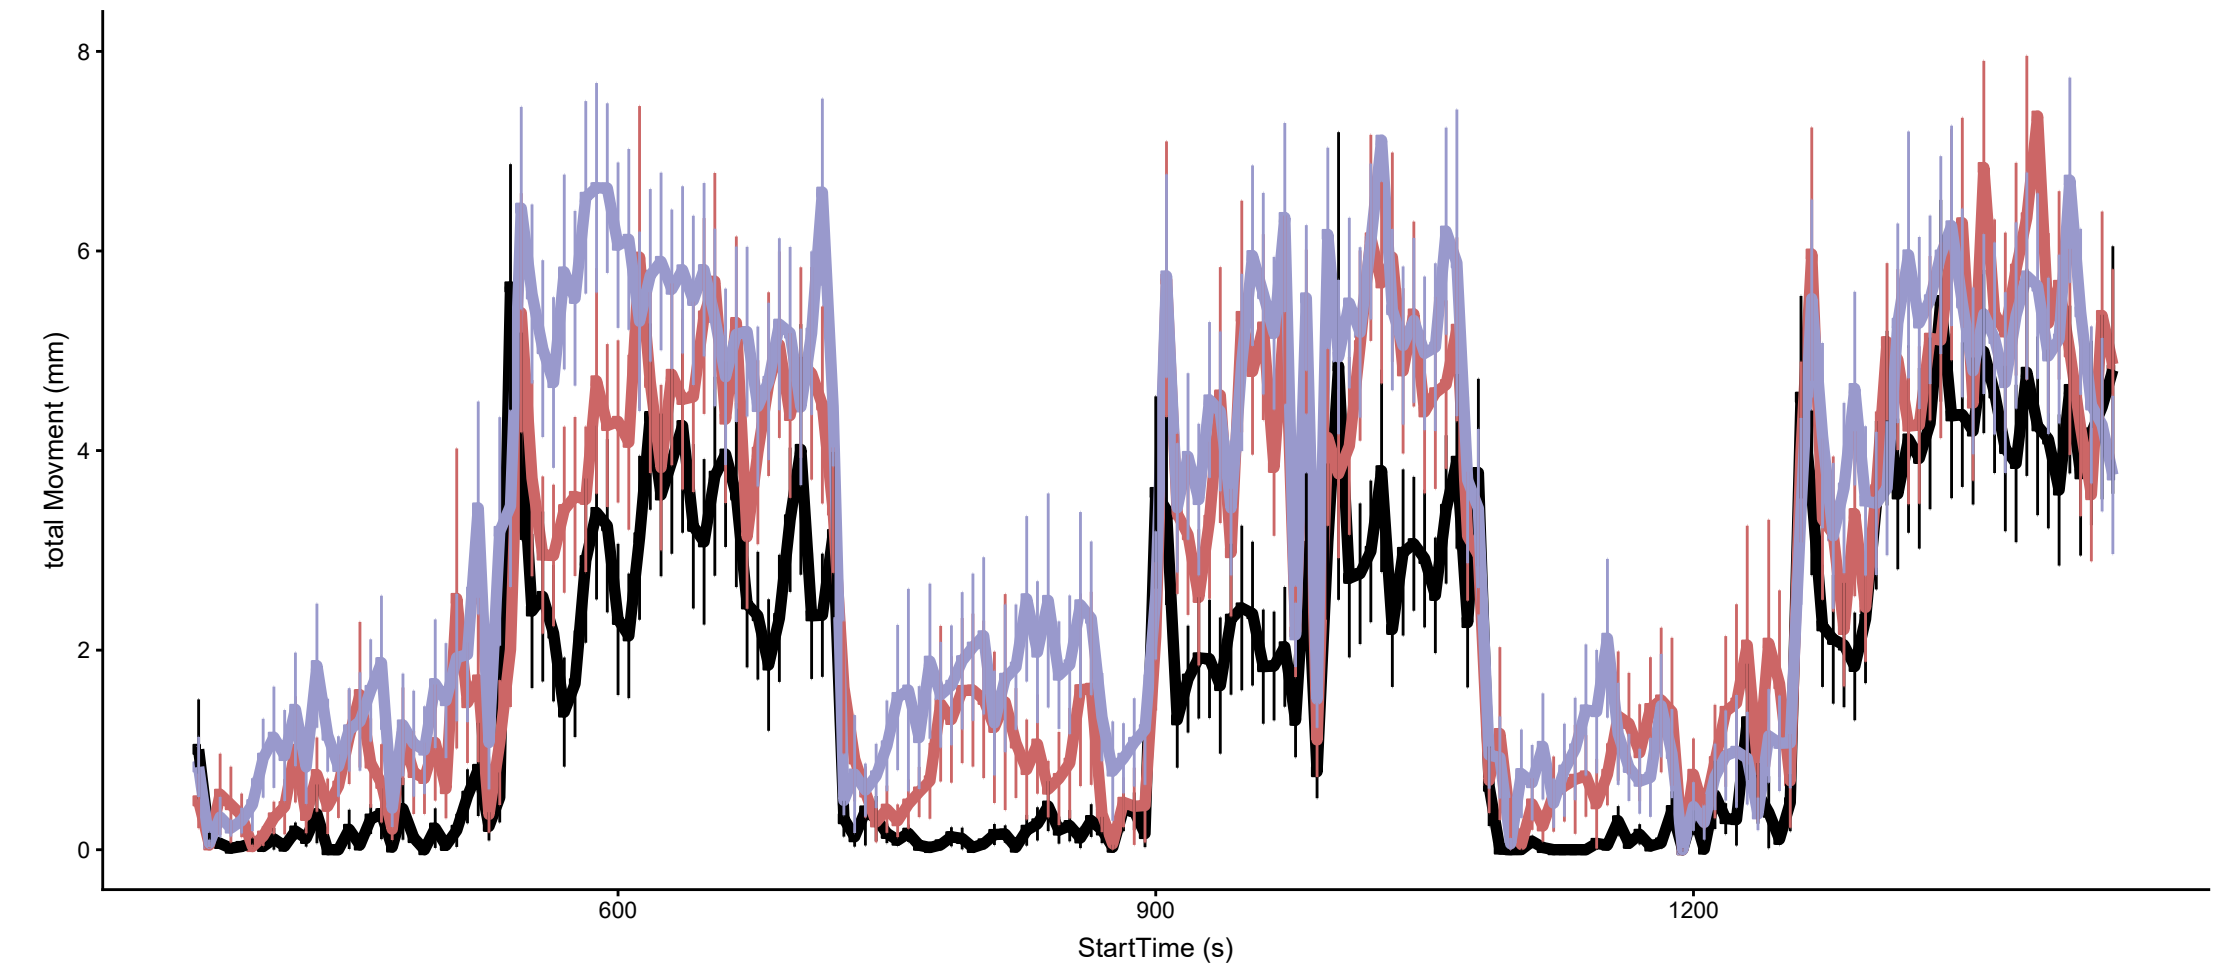

conc 0 0.1 0.2

## Light/Dark

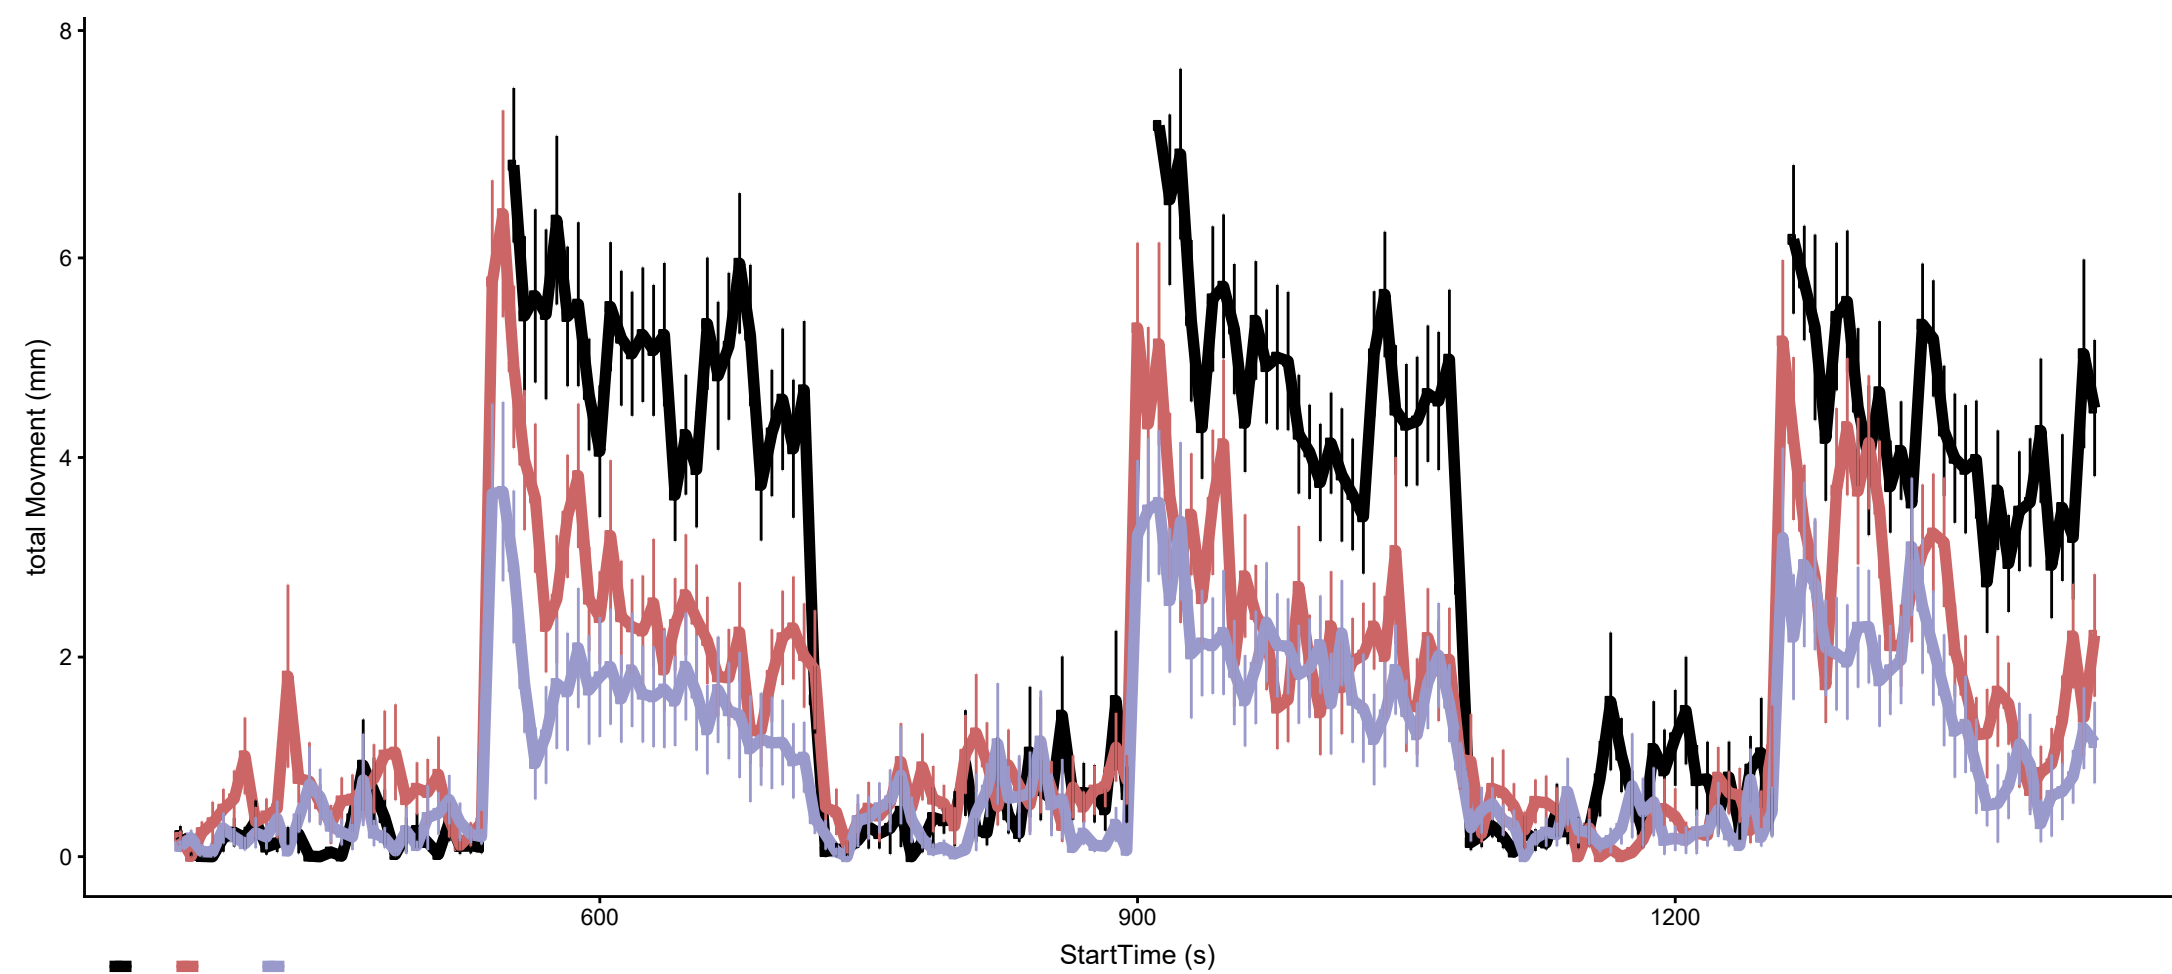

conc 0 0.1 0.2

## Standard

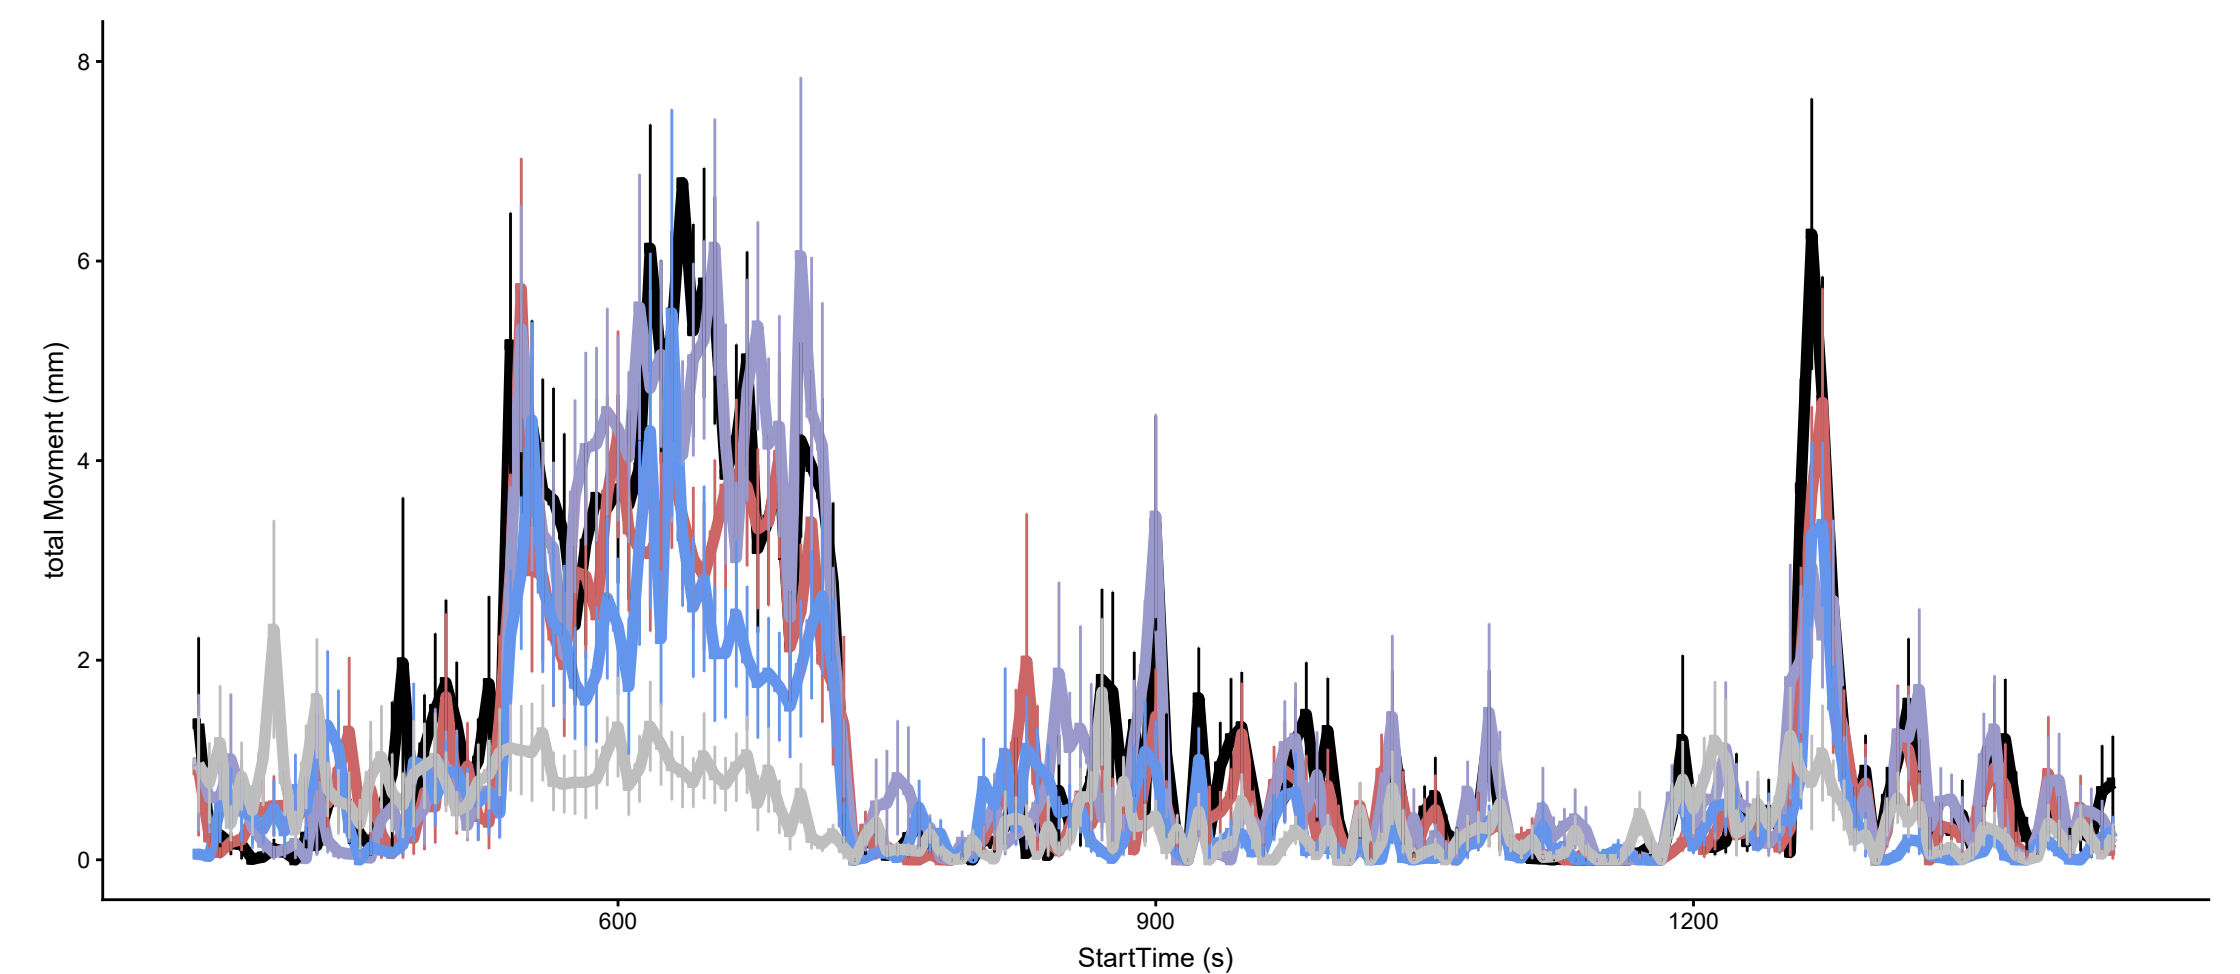

conc 0 0.1 0.2 0.4 0.5

# Chlorpyrifos

## Chorion on

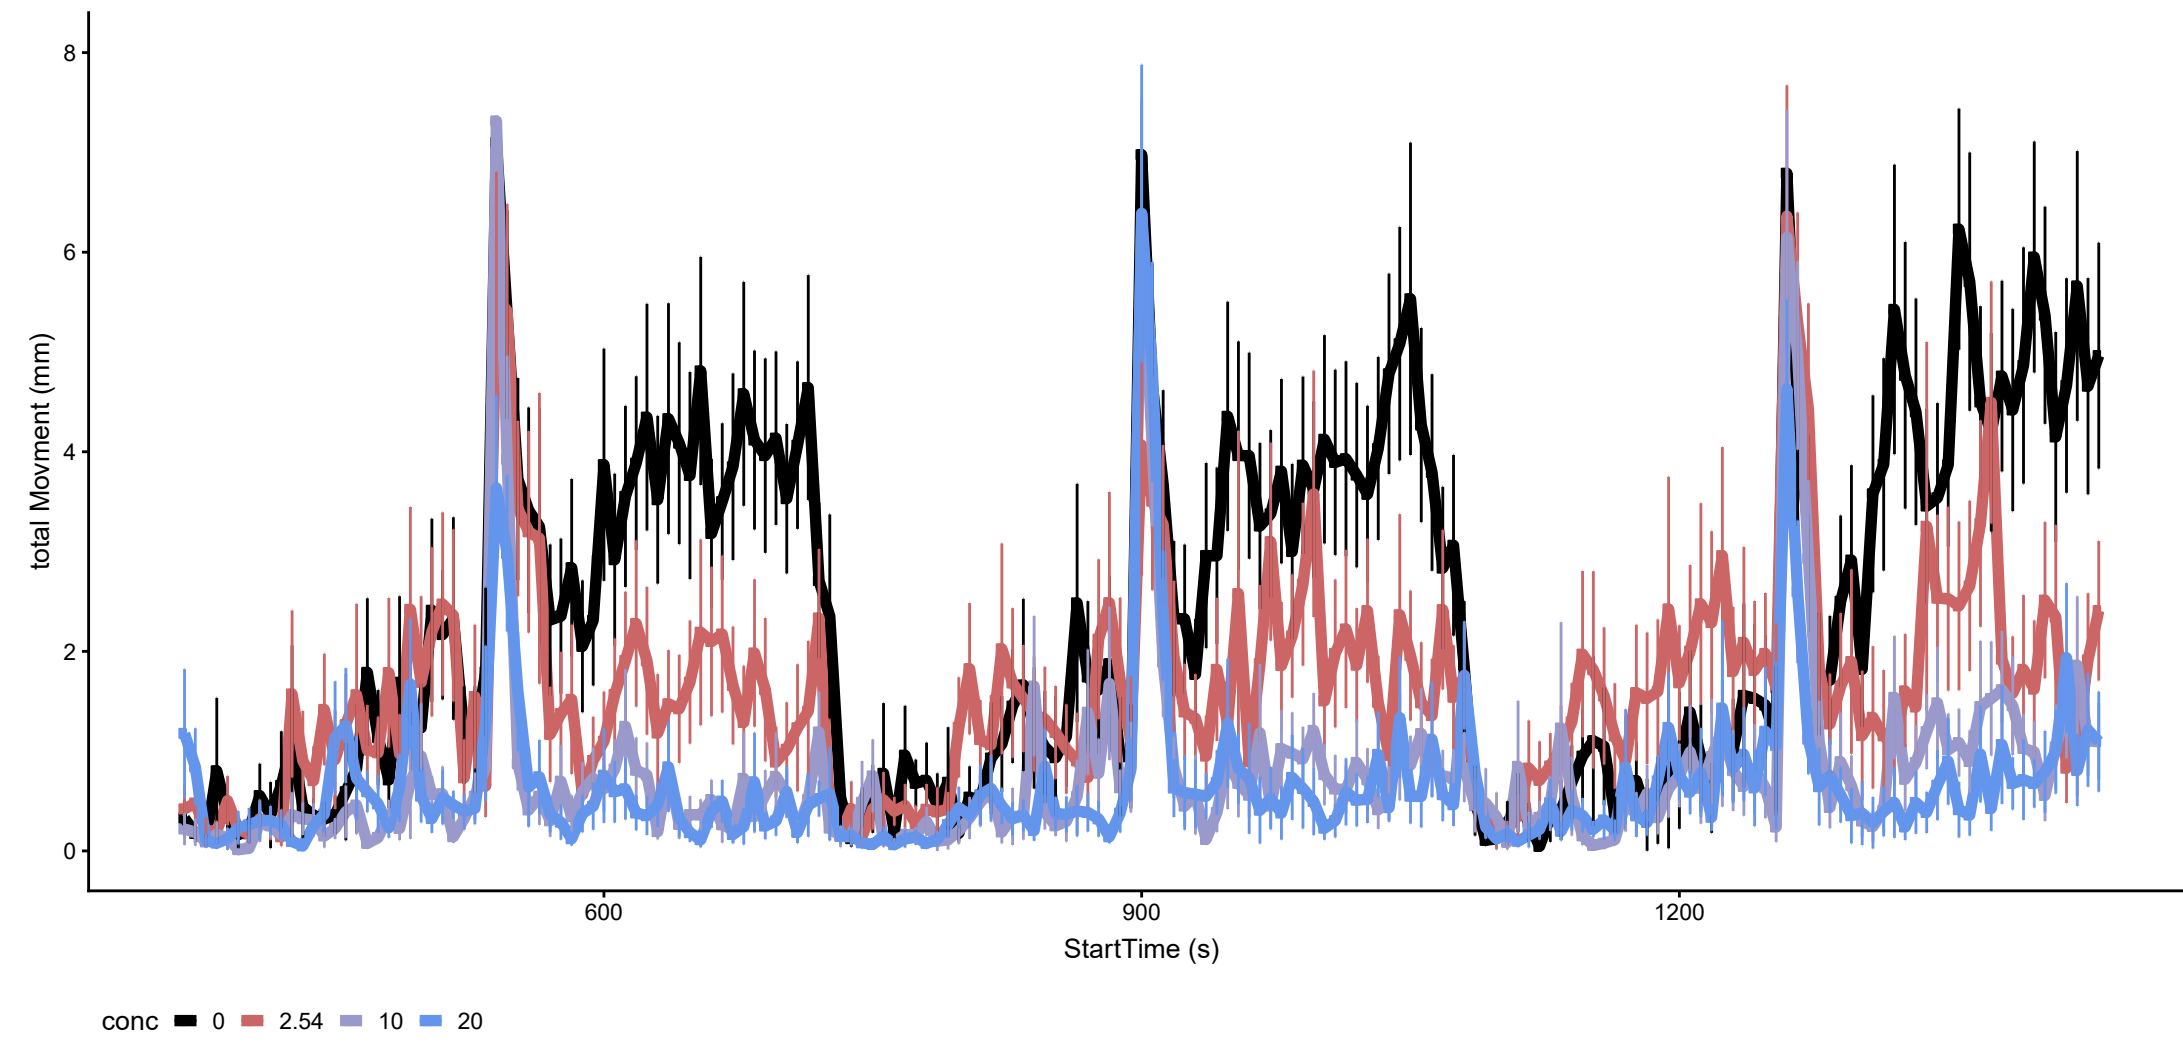

## Daily renewal

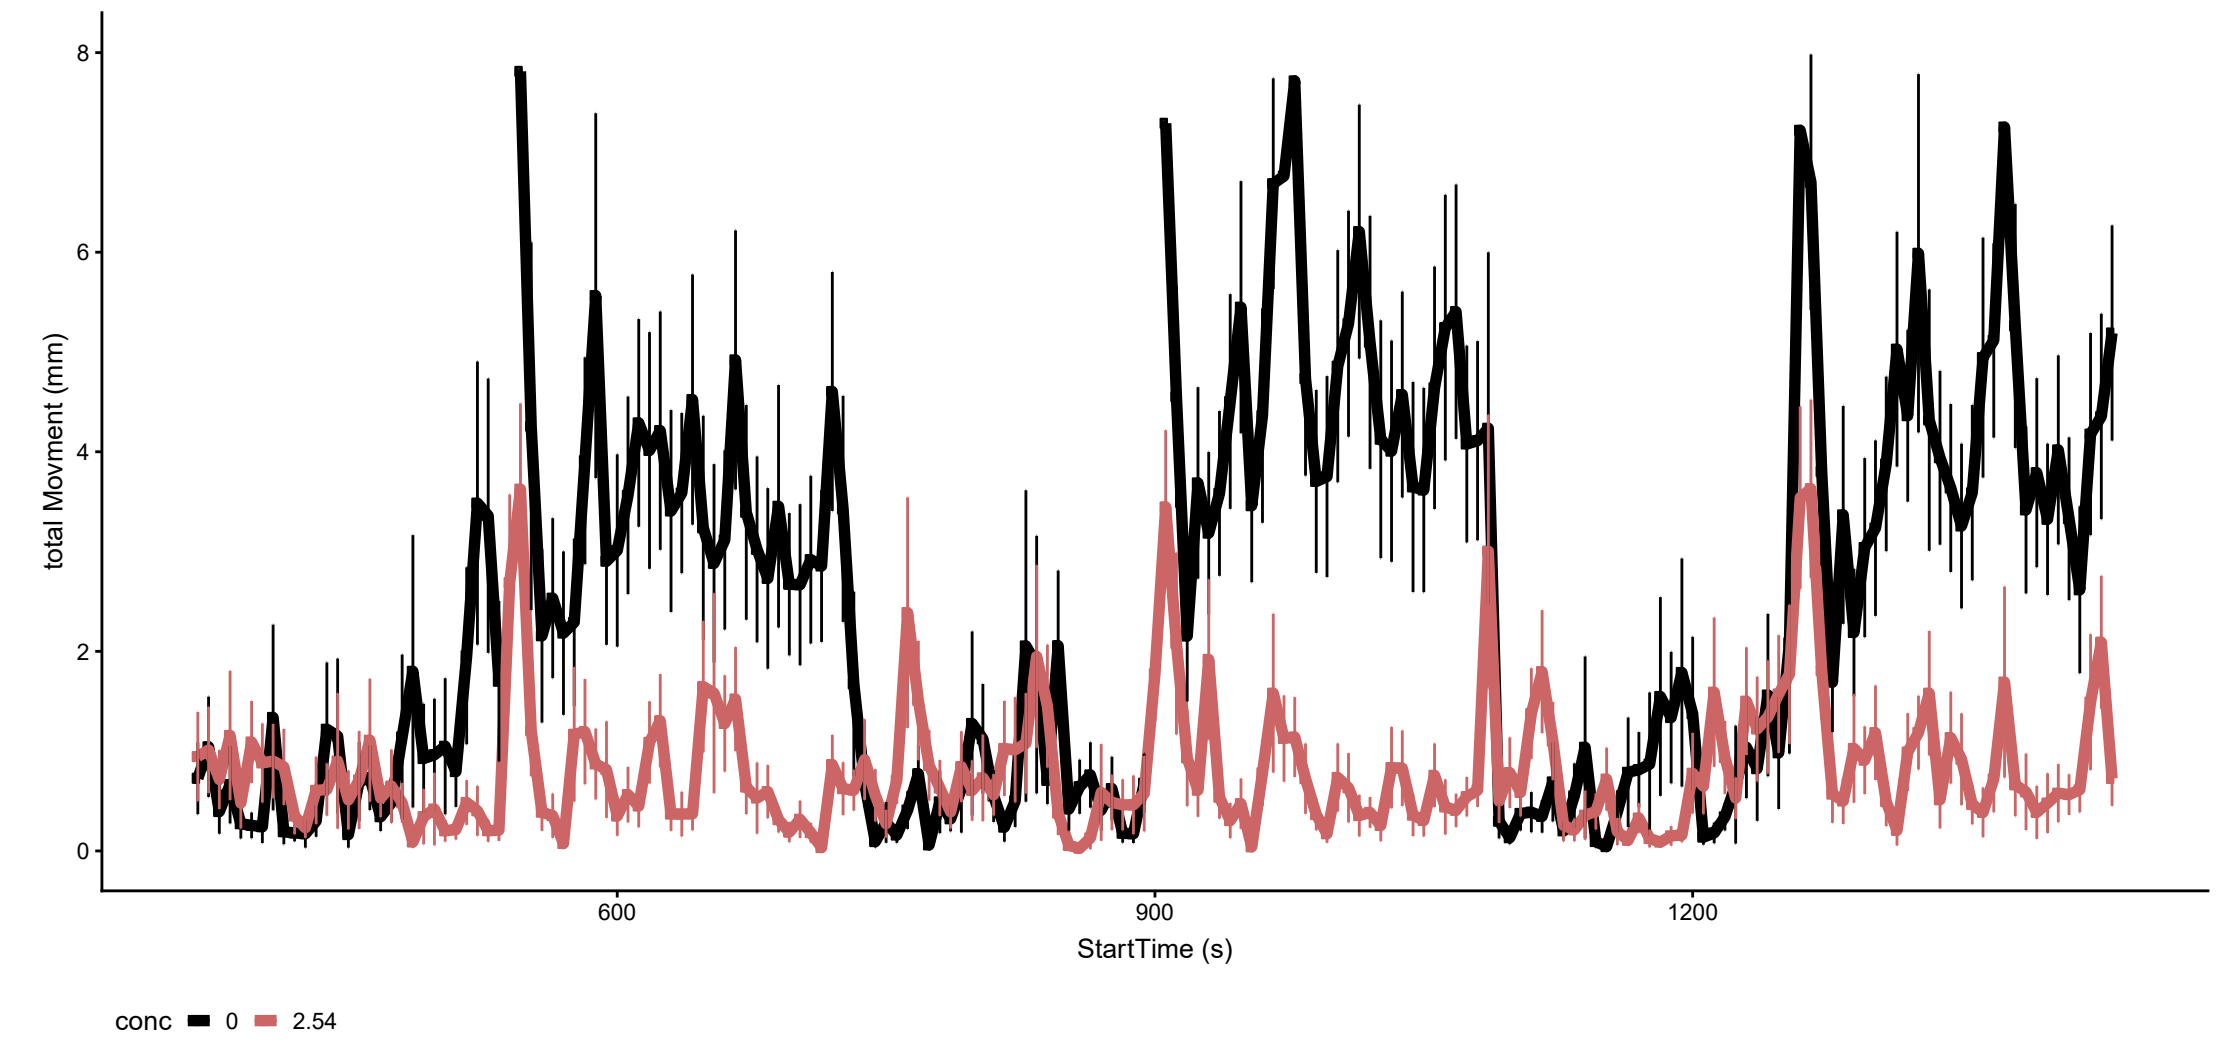

## Light/Dark

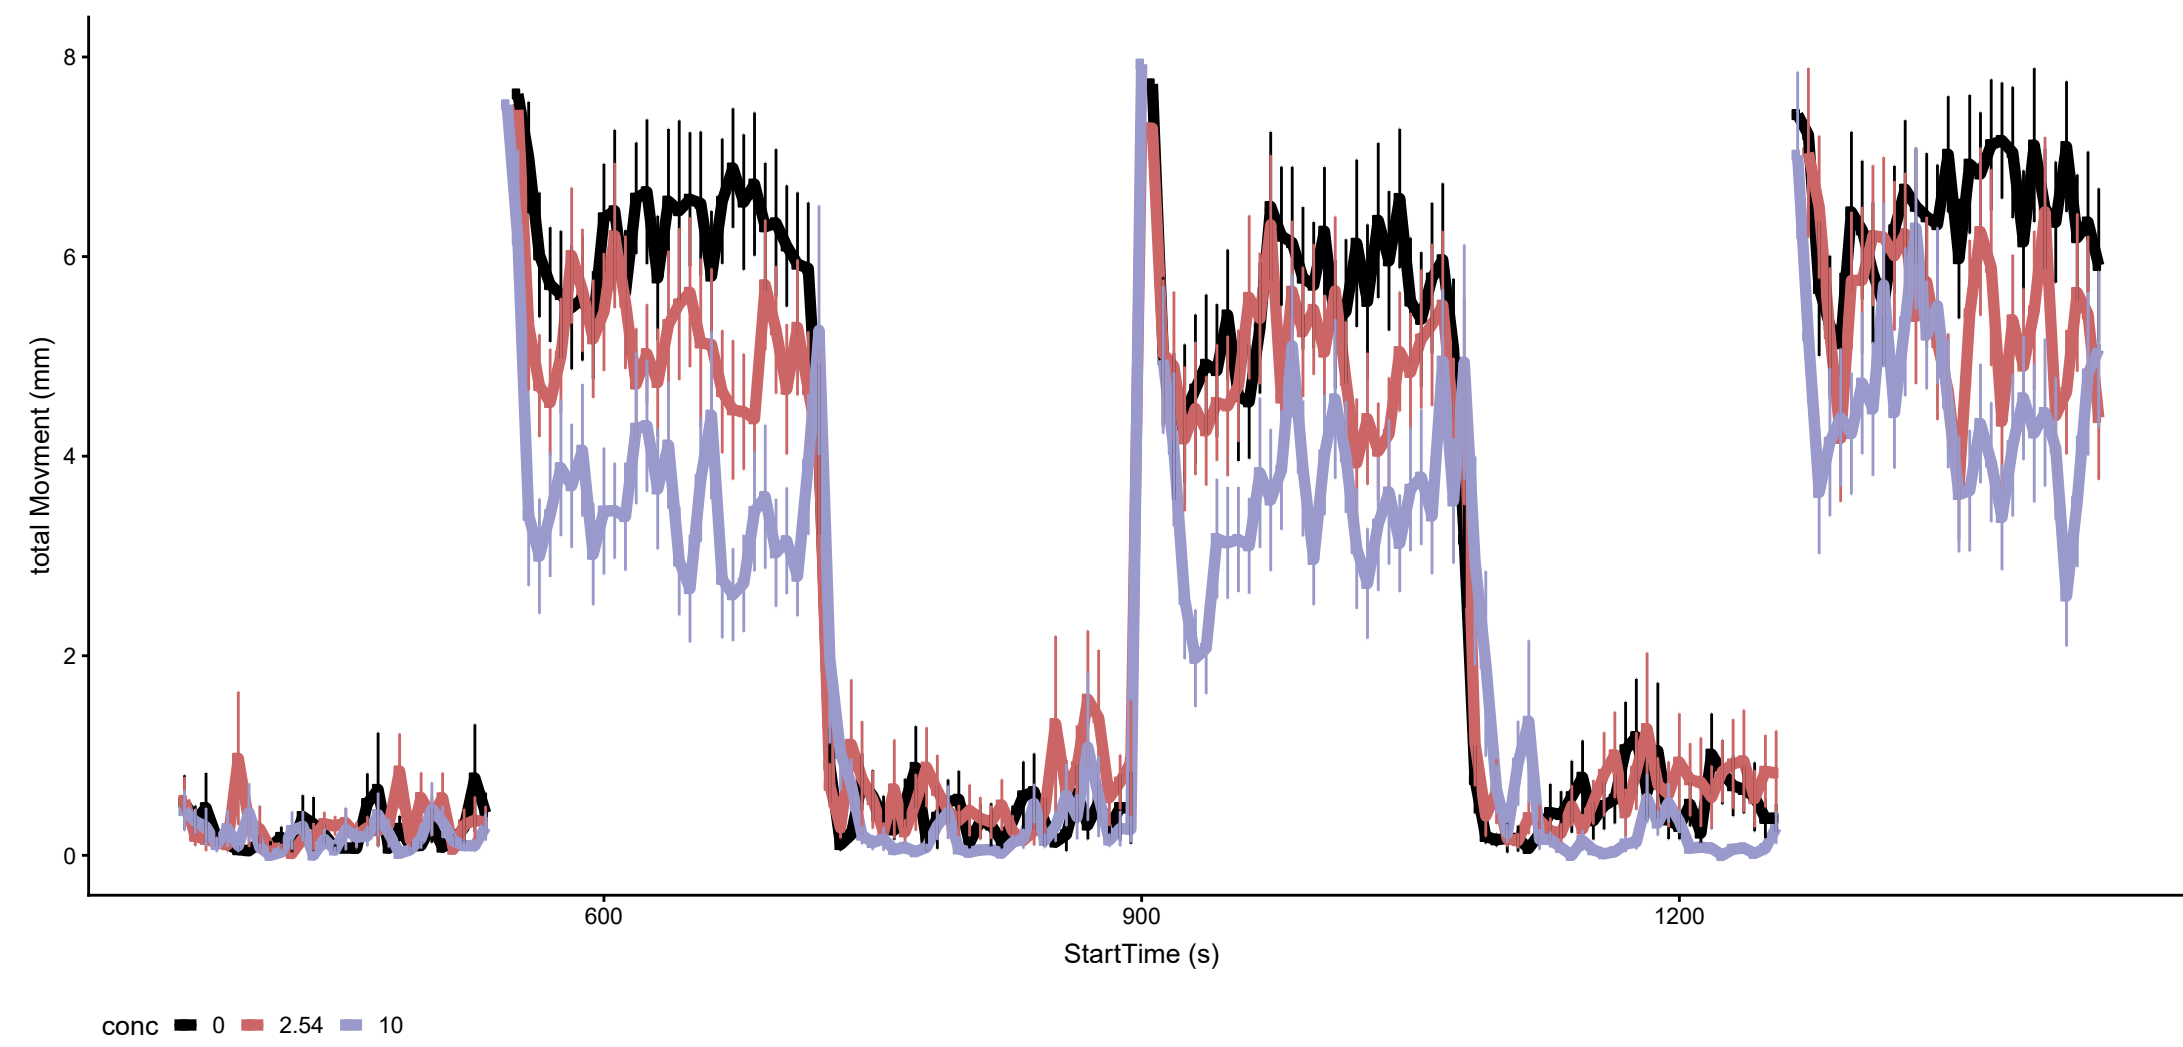

## Standard

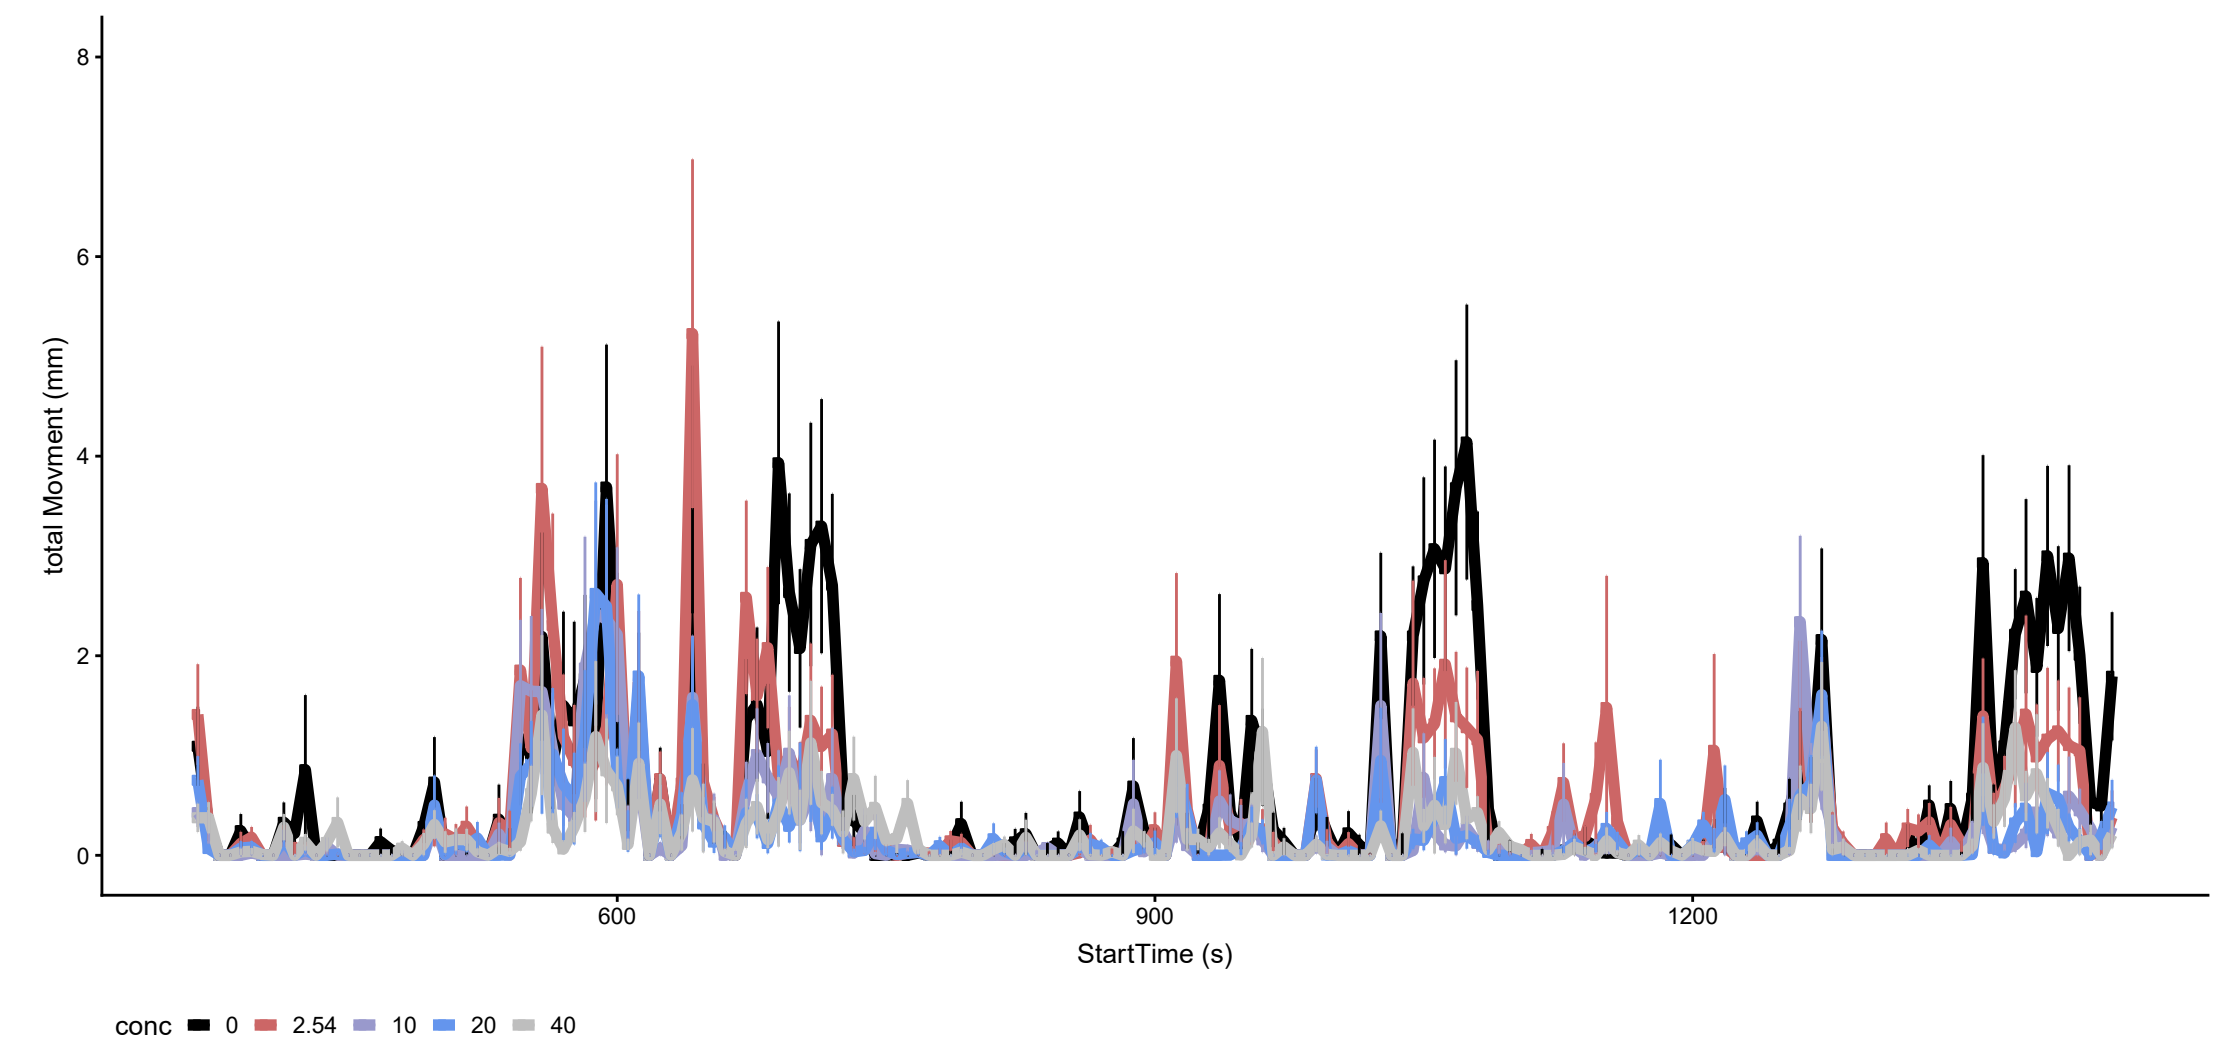



# Estradiol

## Chorion on

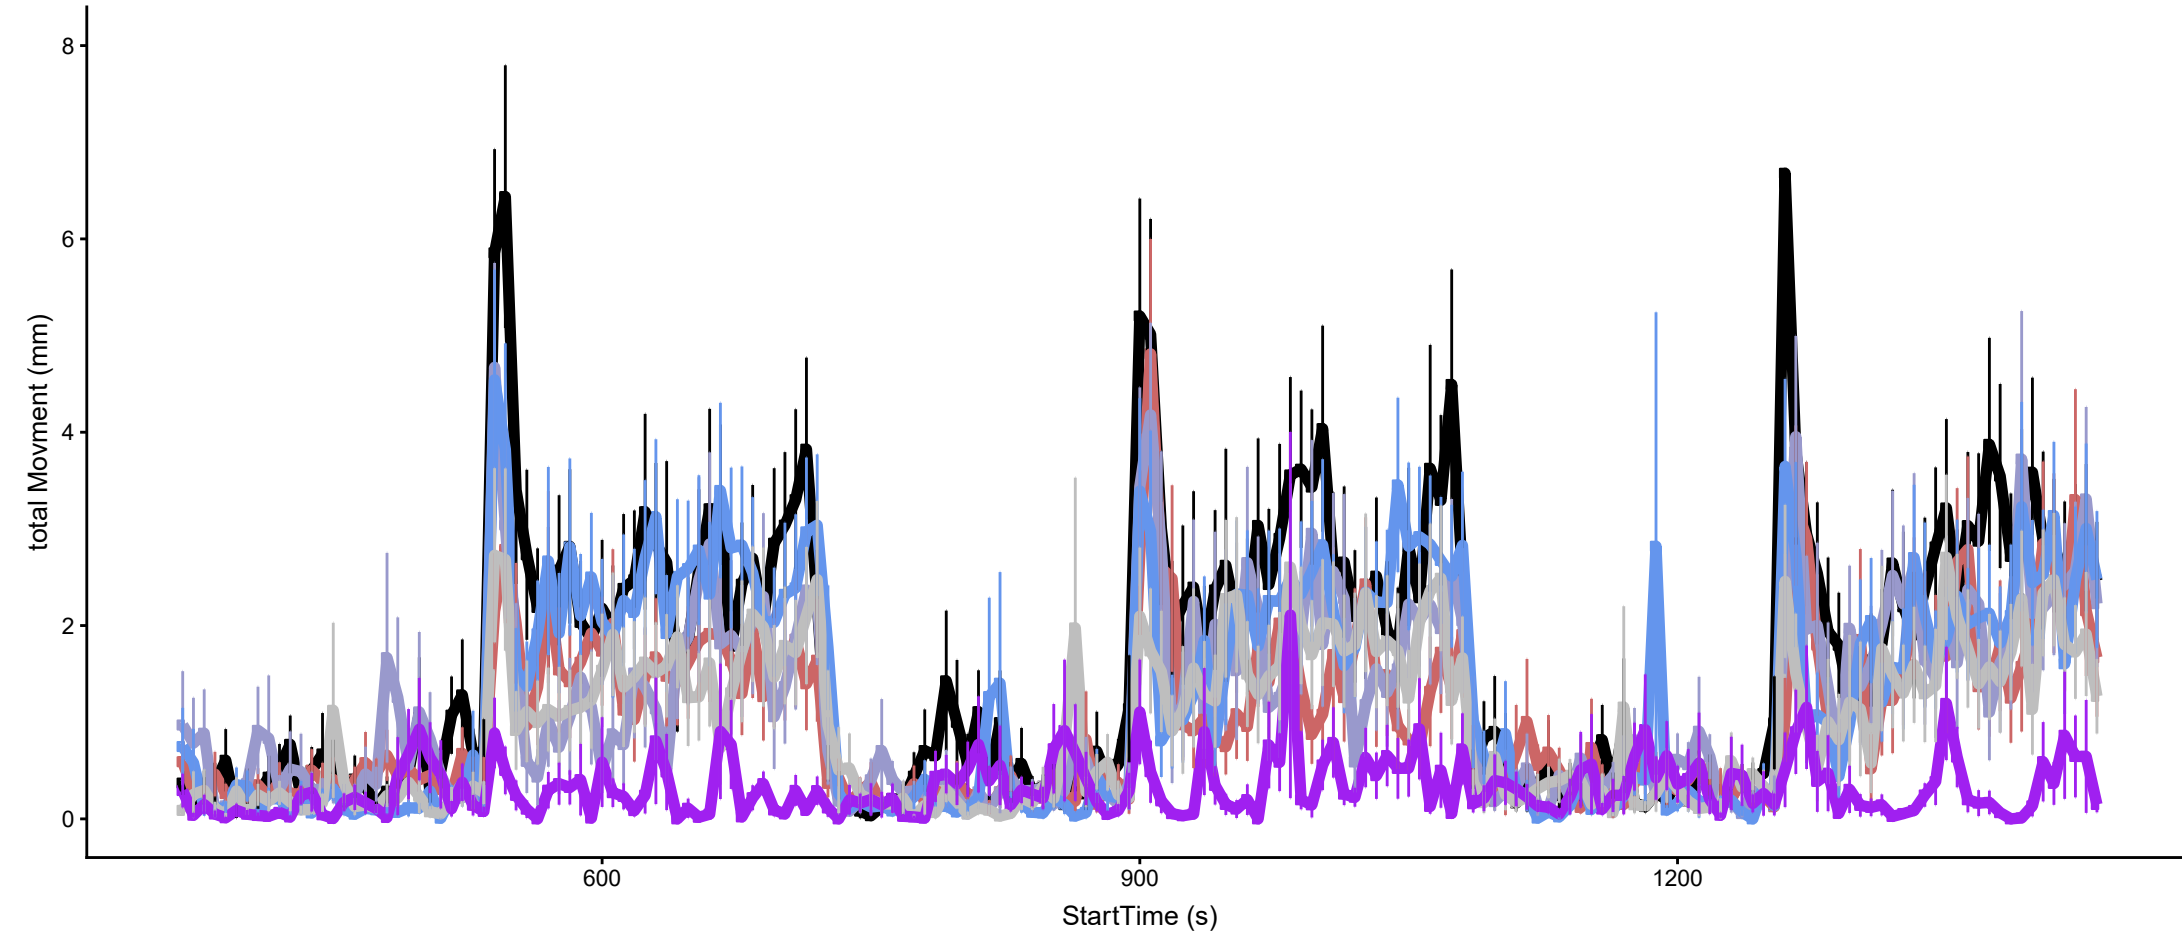

conc 0 1 2.54 5 7 9

## Daily renewal

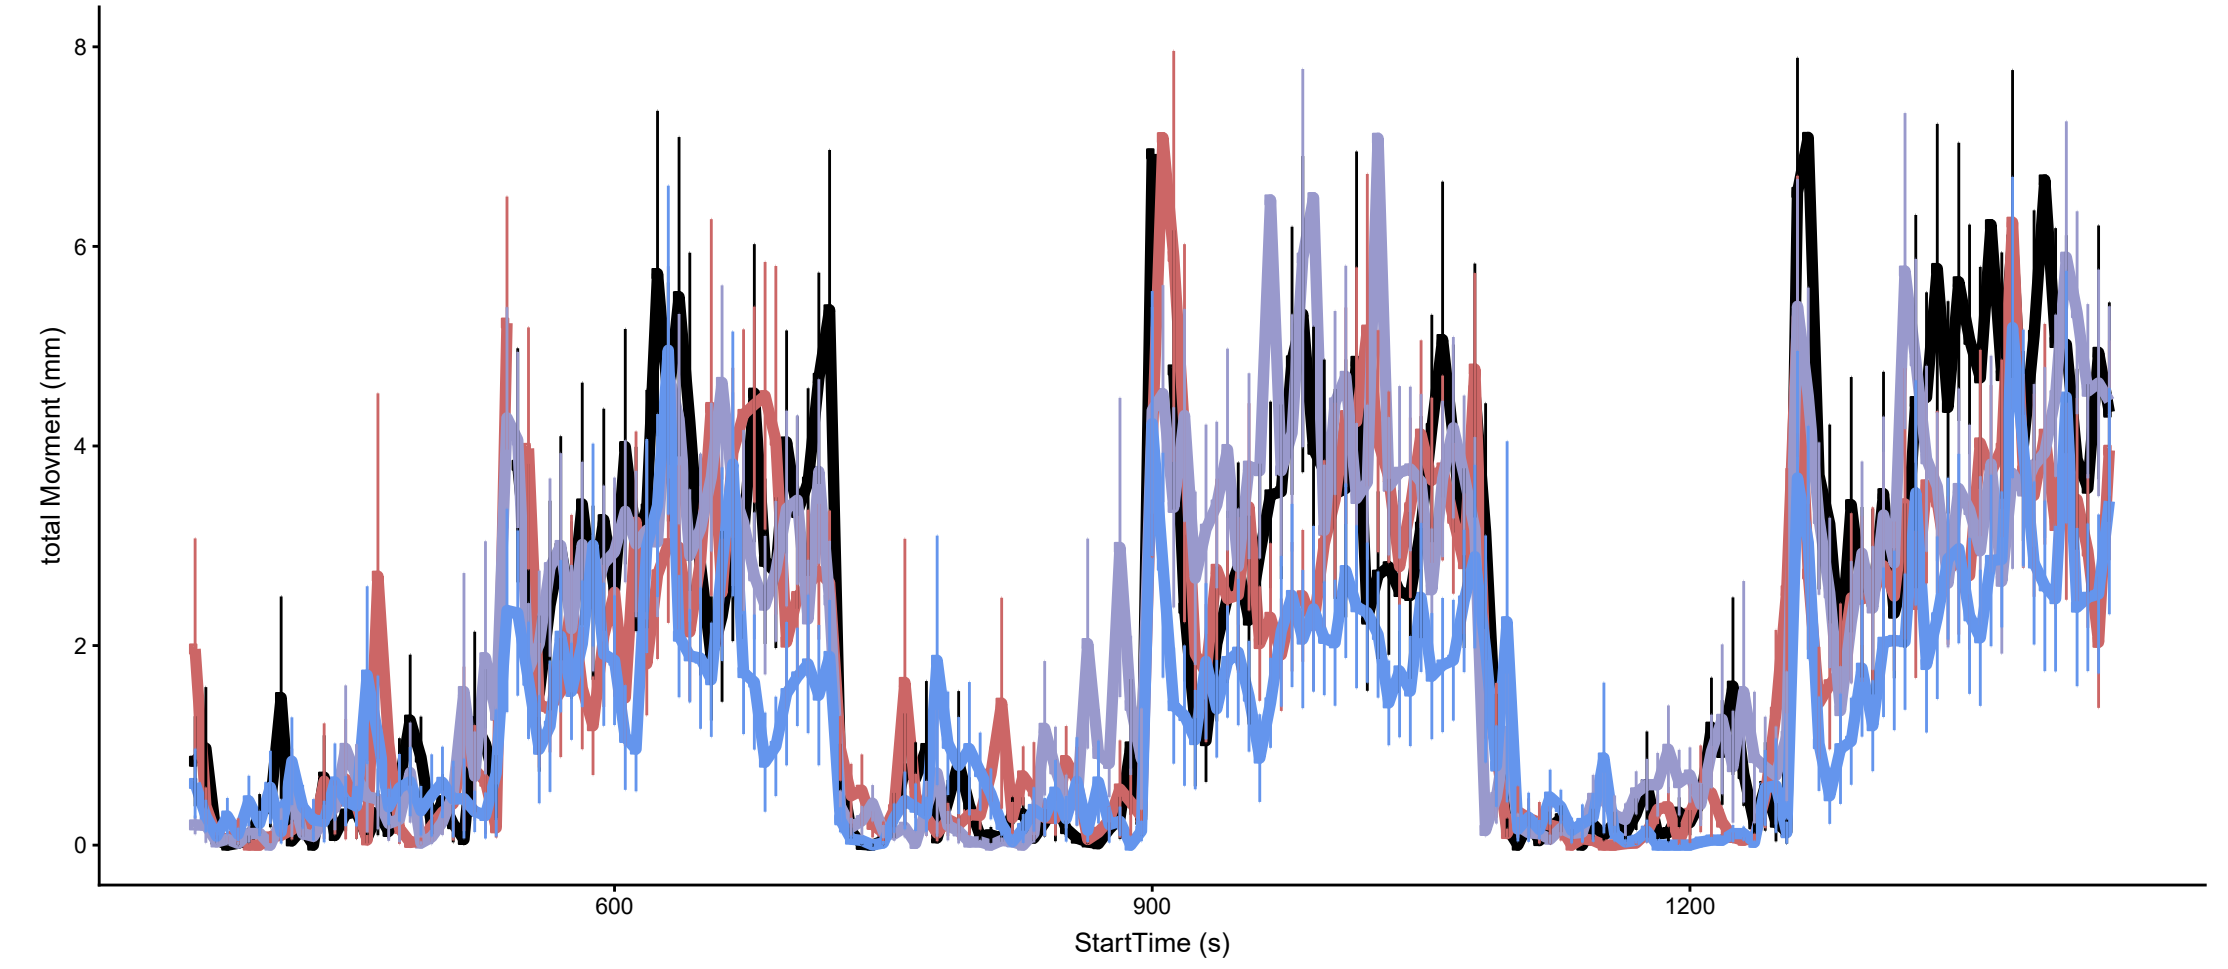

conc 0 1 2.54 5

## Light/Dark

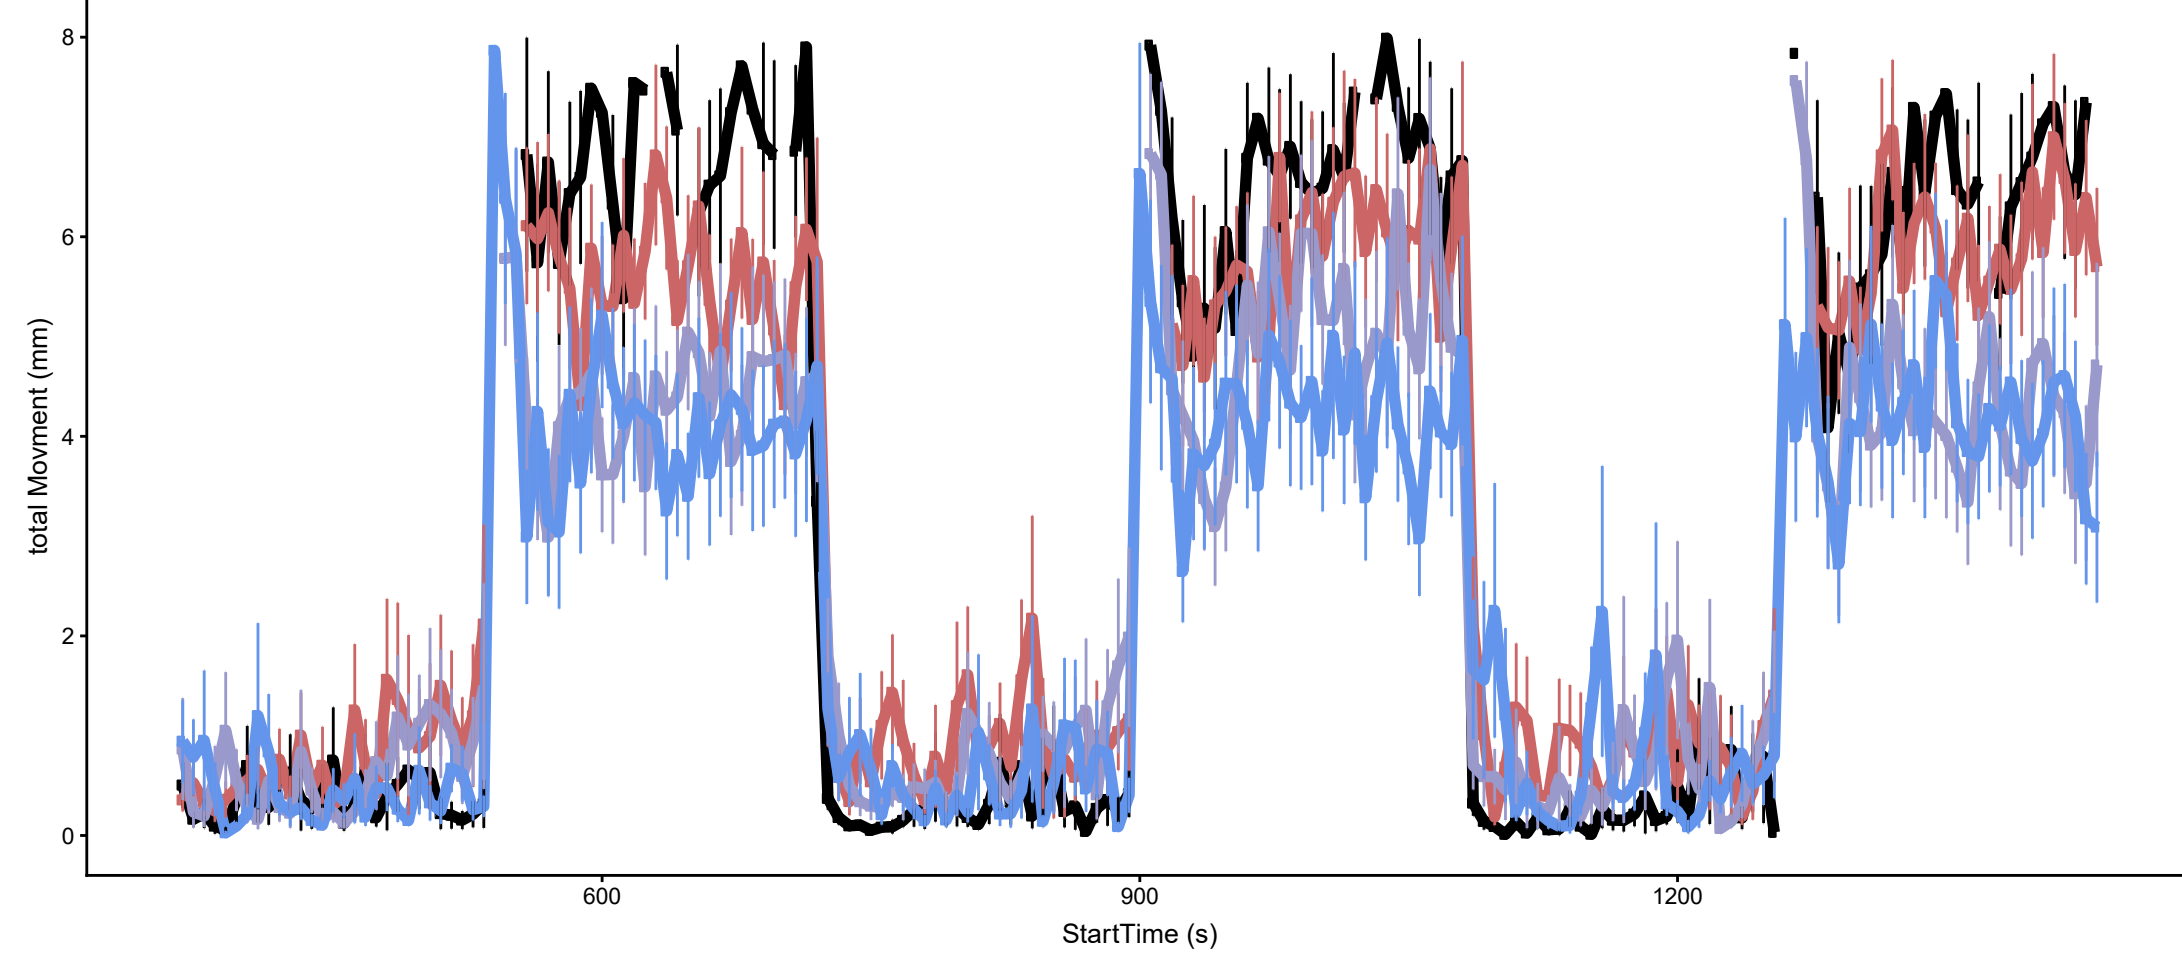

conc 0 1 2.54 5

## Standard

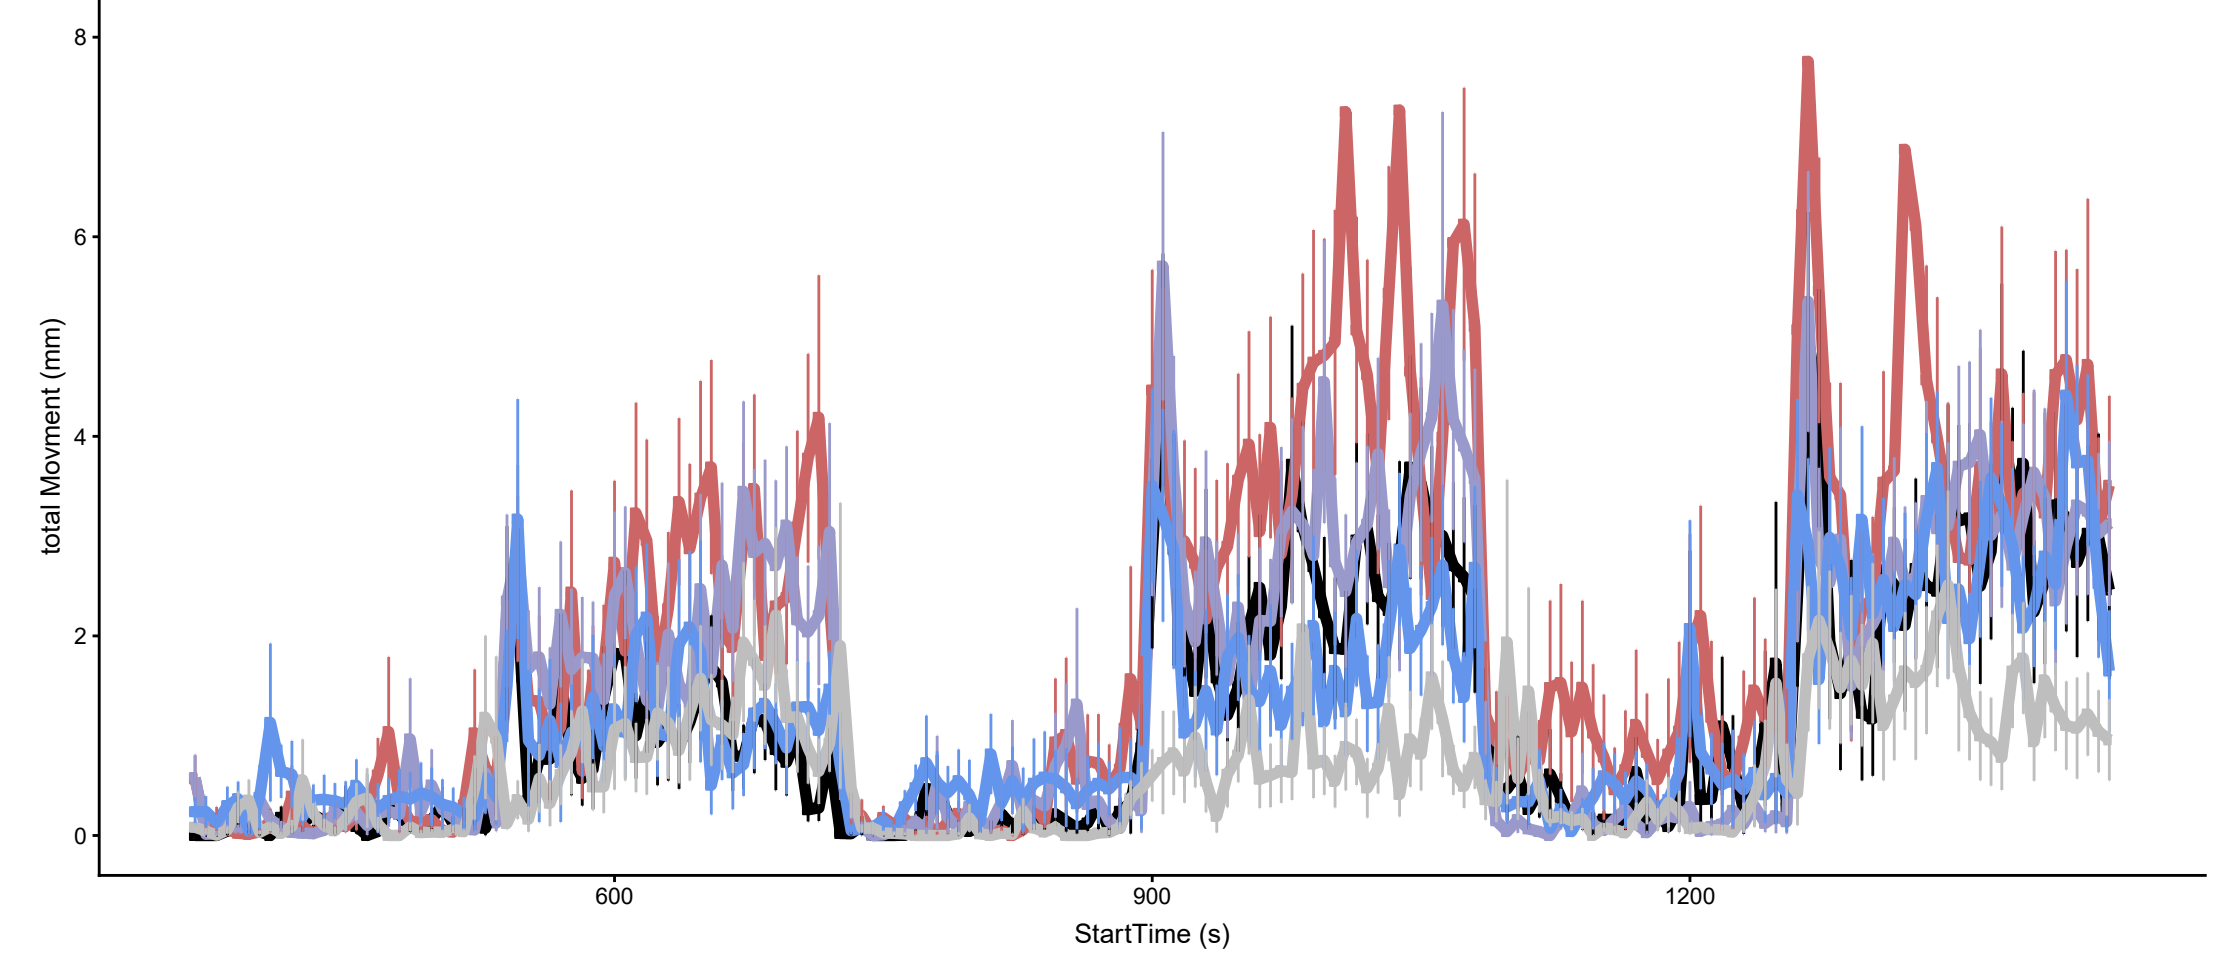

conc 0 1 2.54 5 7

# Hydroxyurea

## Chorion on

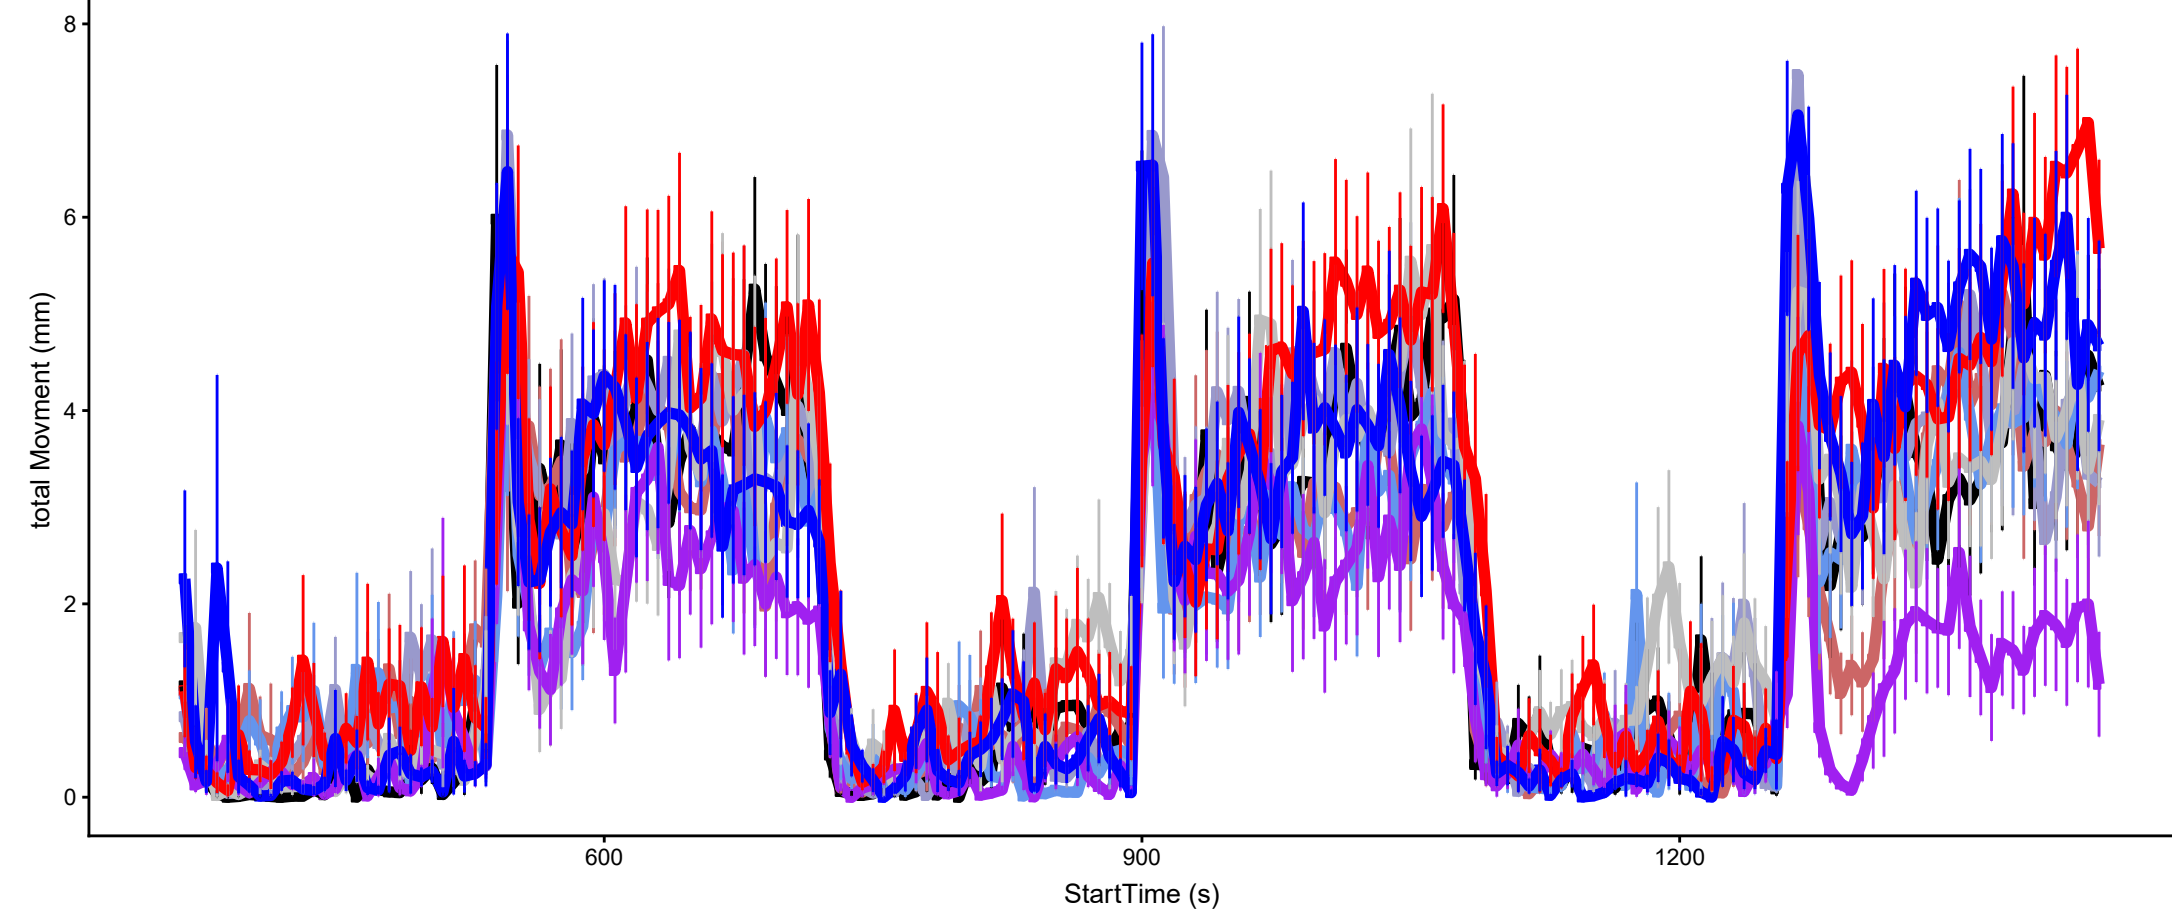

## Daily renewal

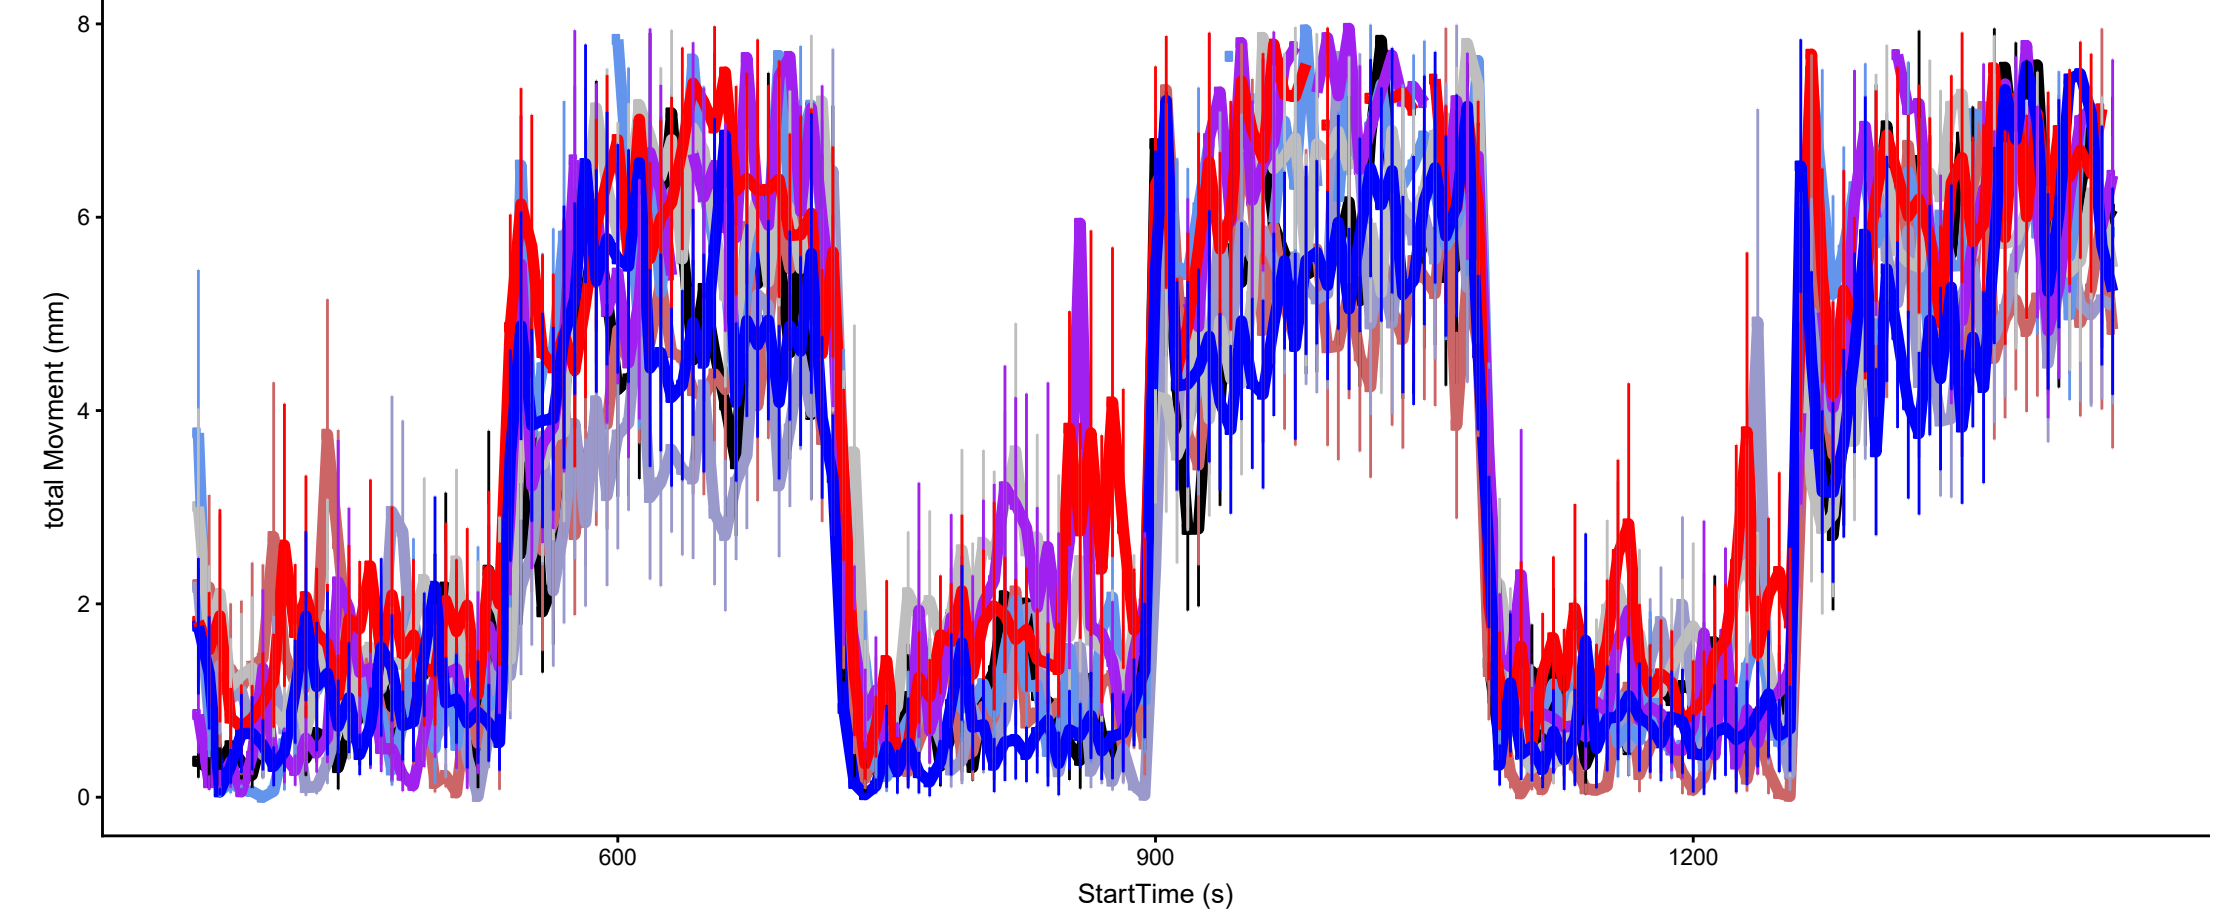

## Light/Dark

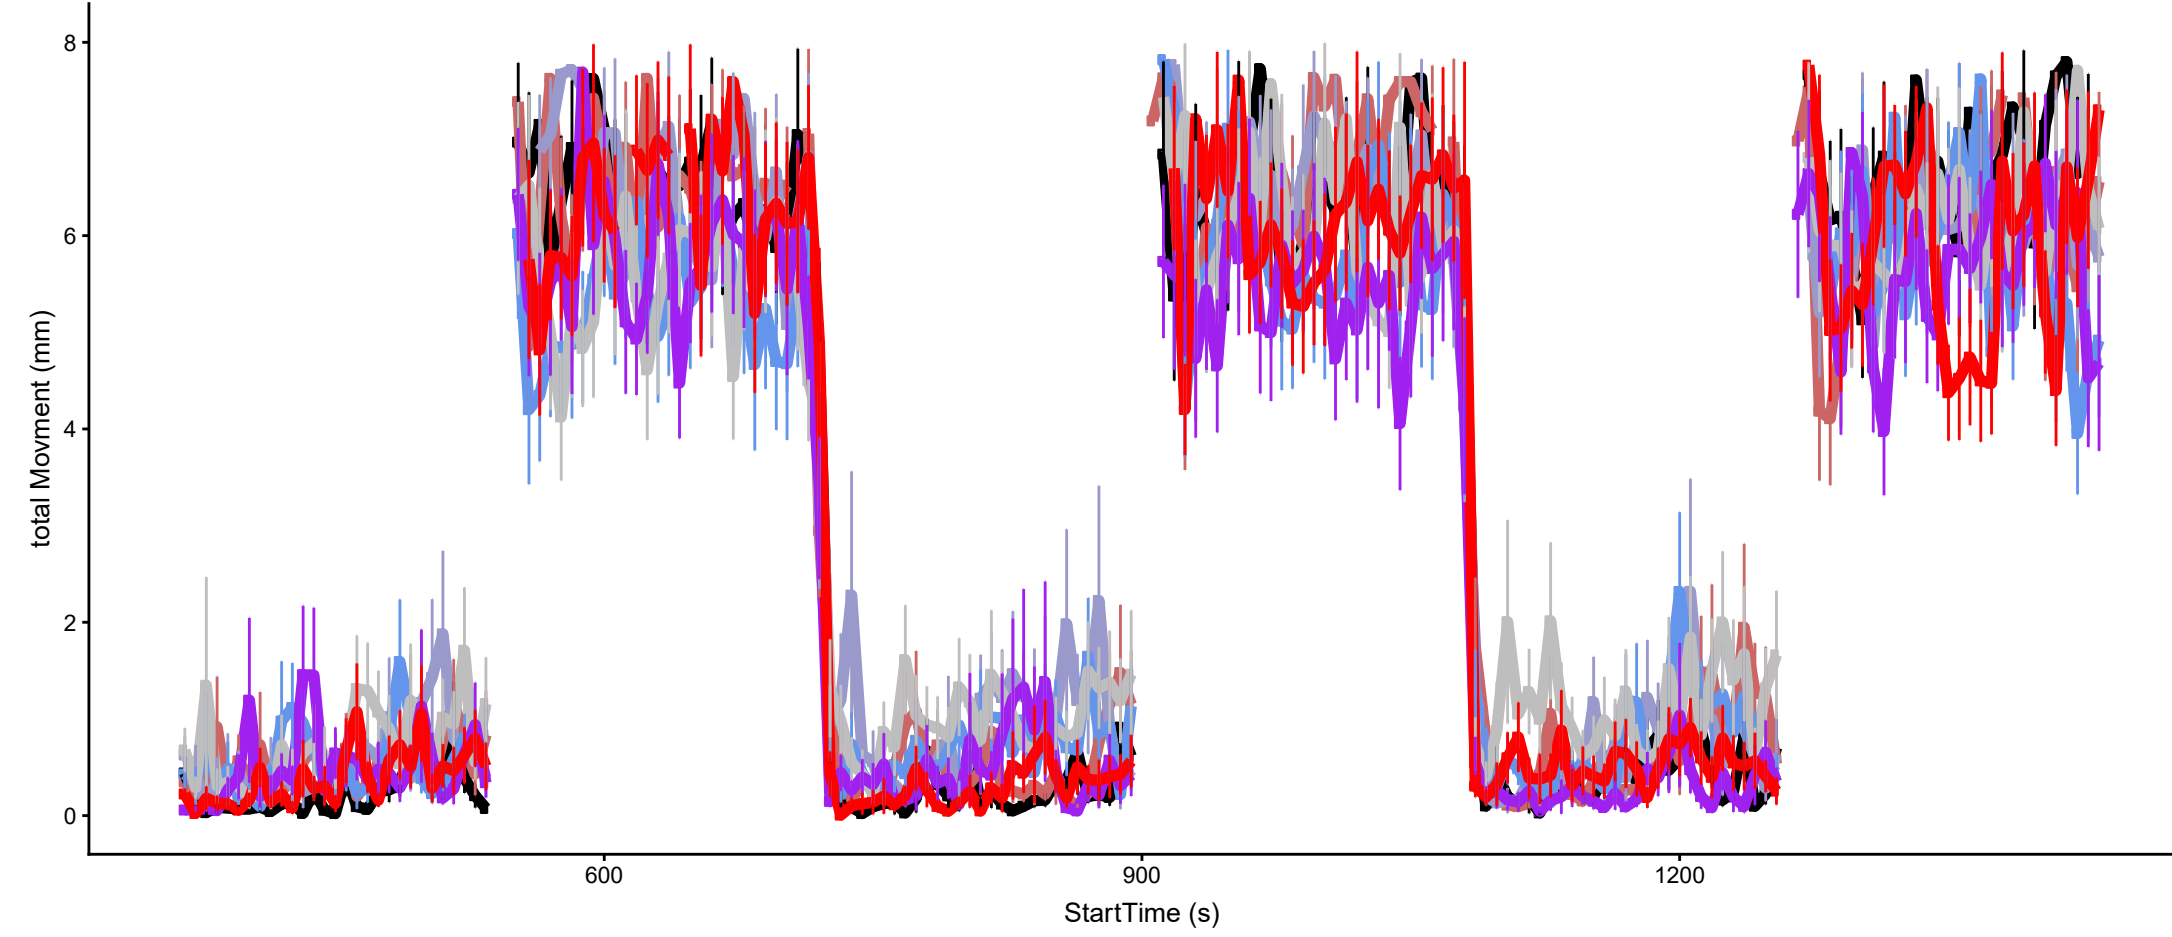

## Standard

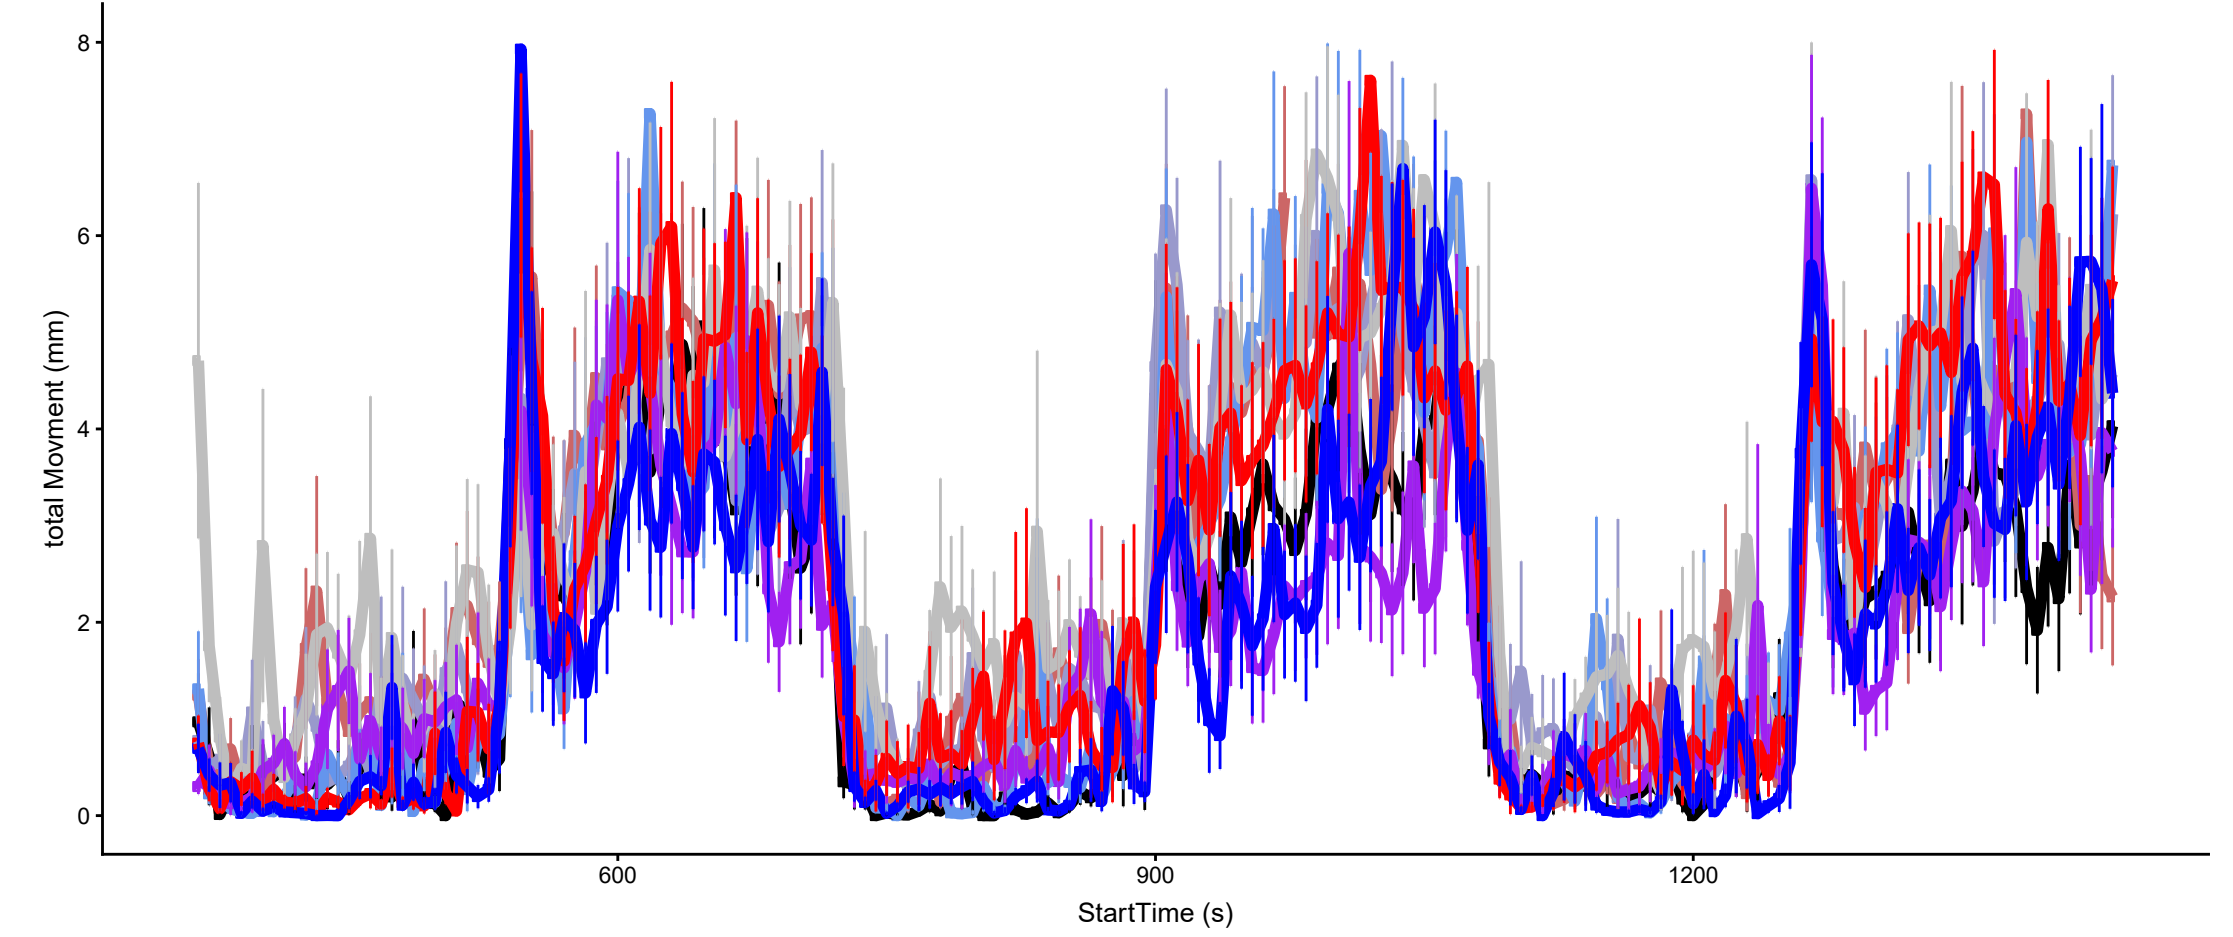

# MWCNTs

## Chorion on

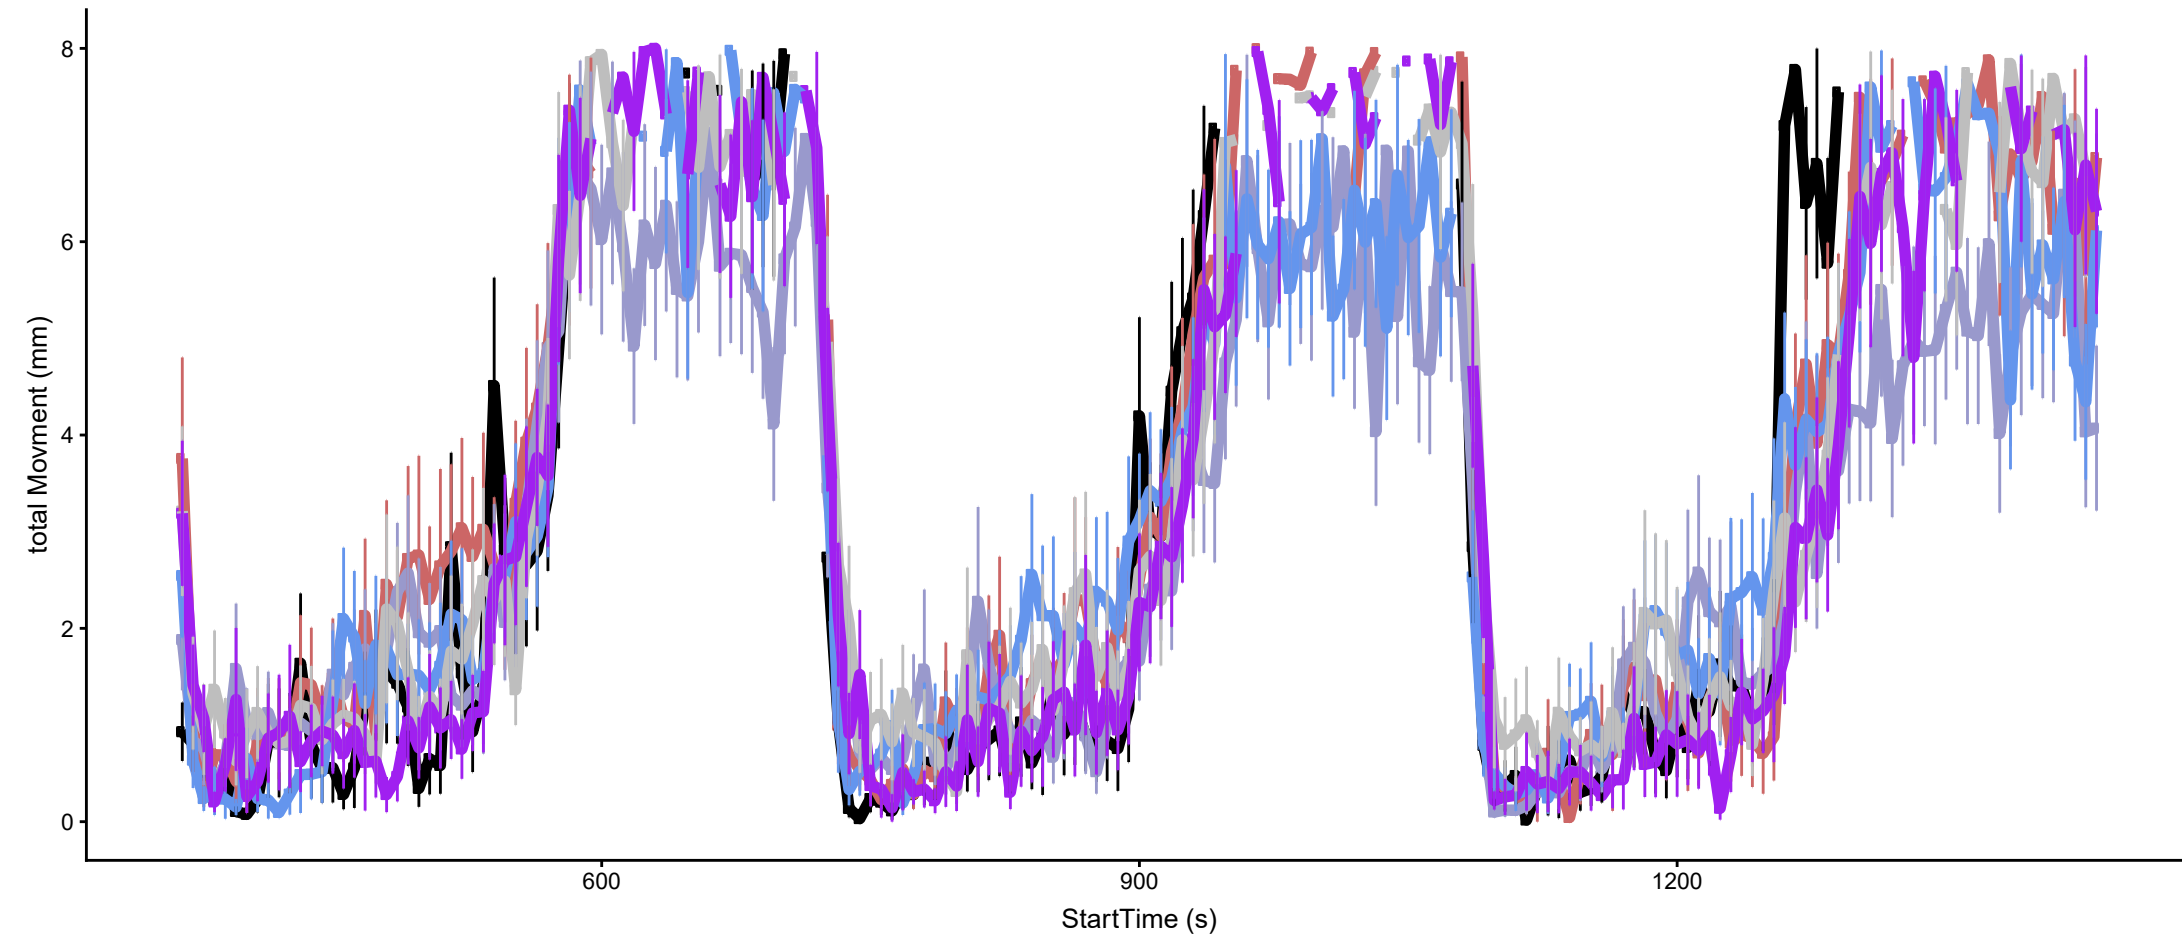

conc 0 10 23.2 50 75 100

## Daily renewal

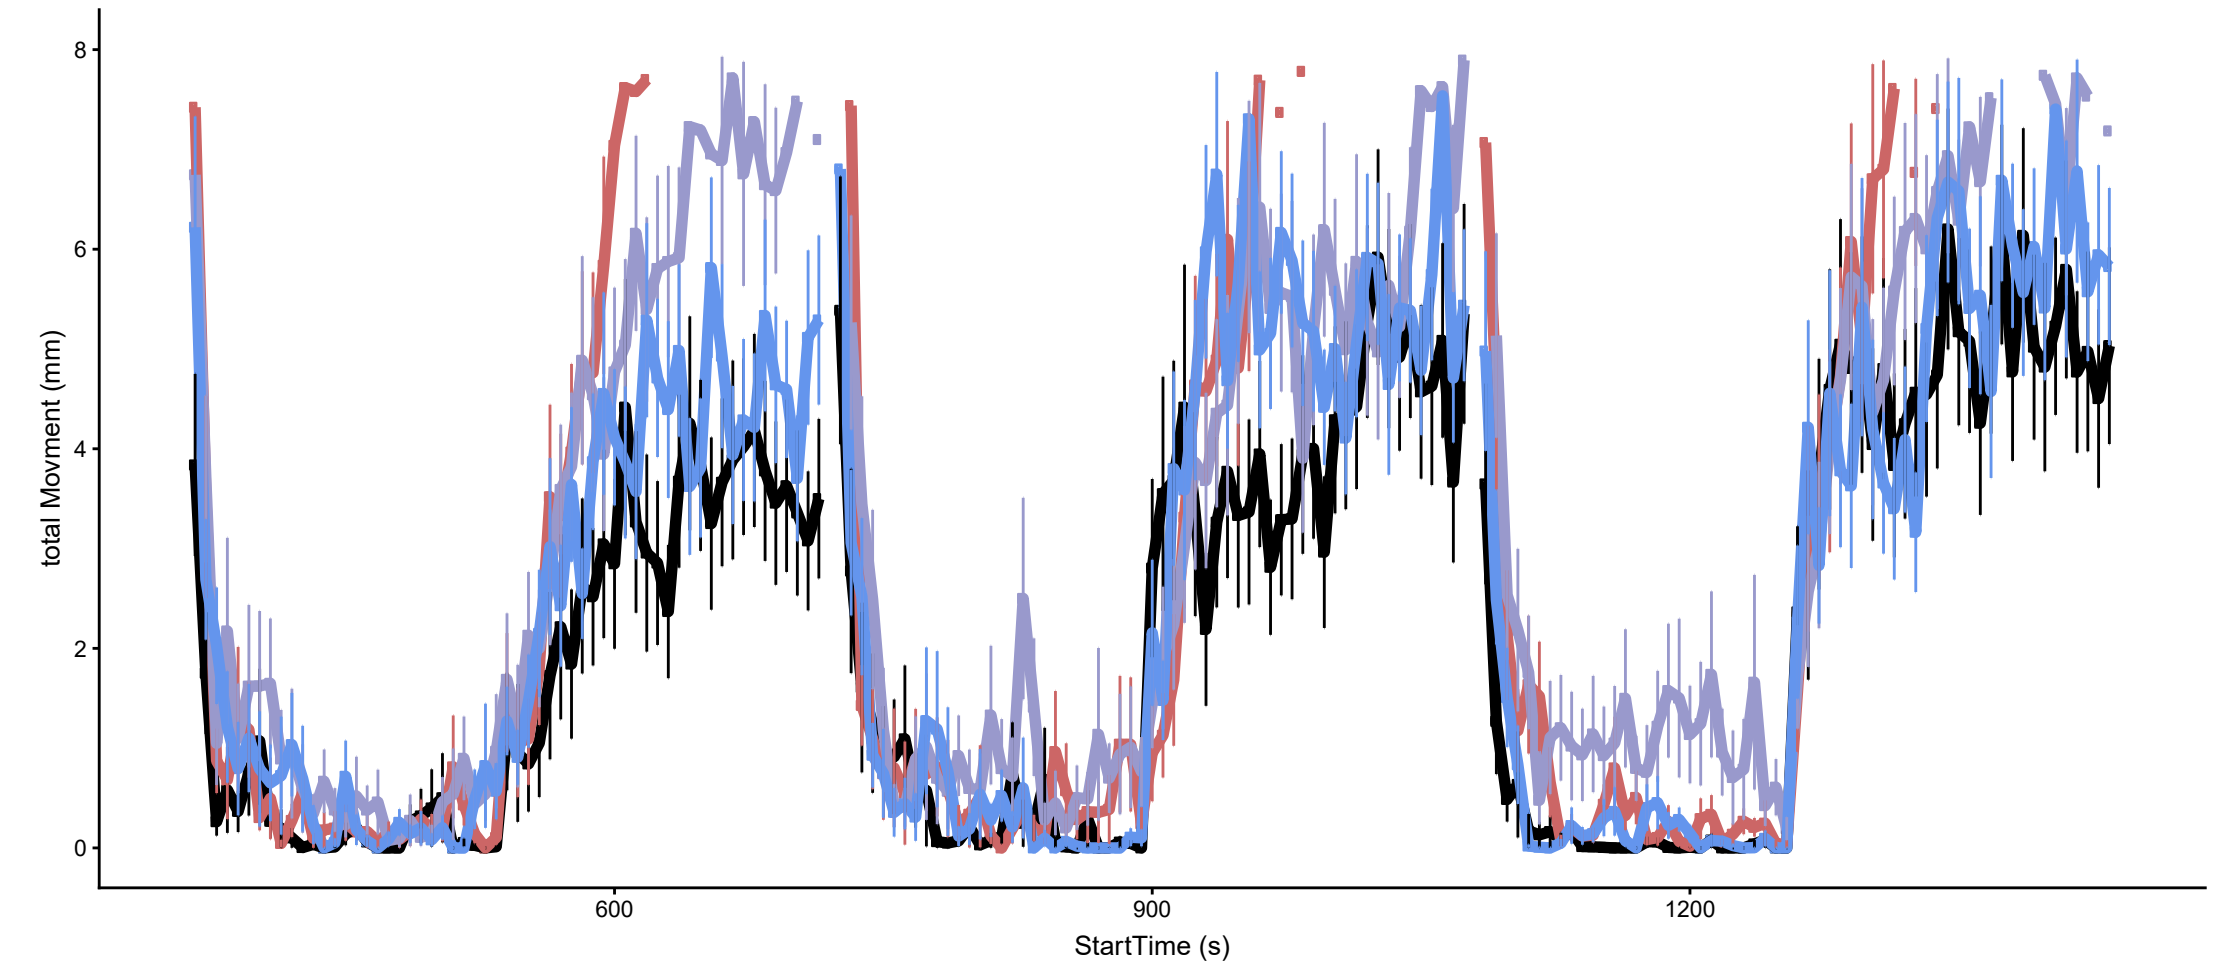

conc 0 10 23.2 50

## Light/Dark

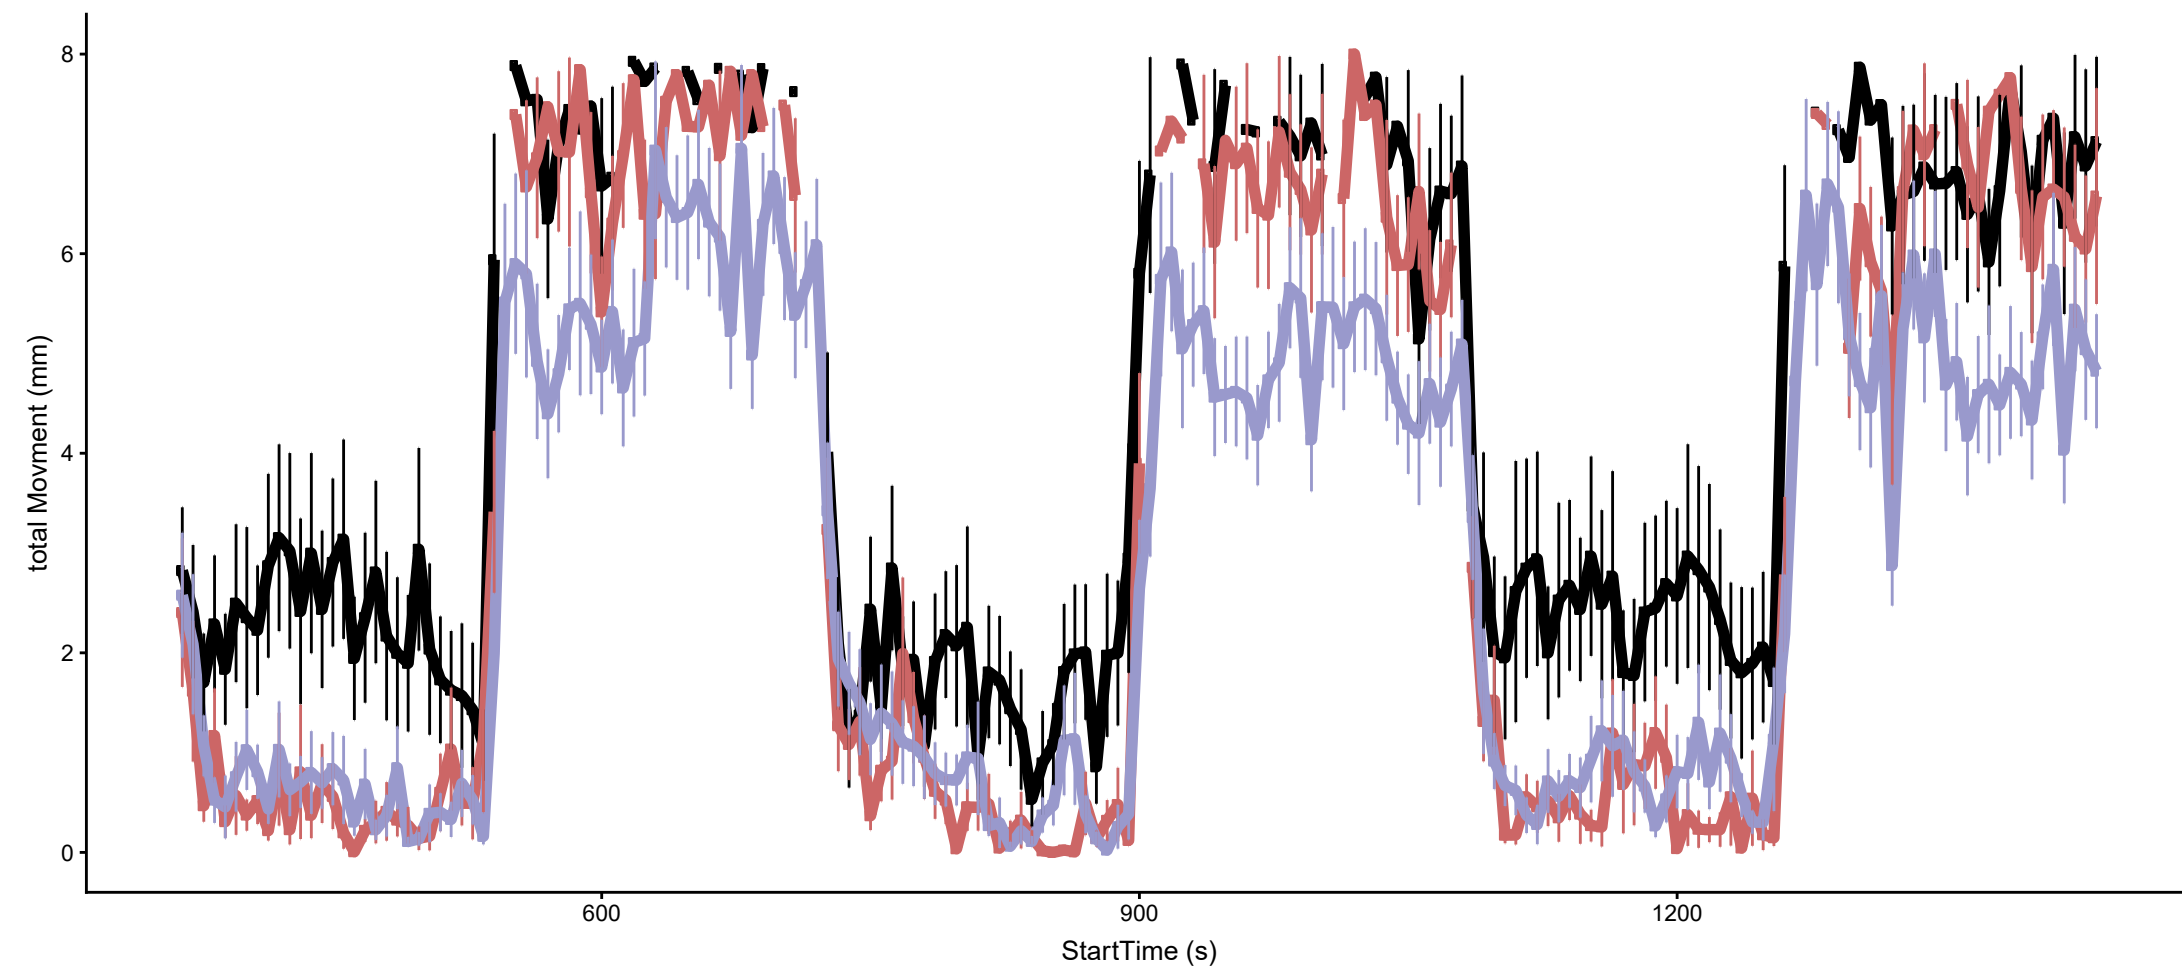

conc 0 10 23.2

## Standard

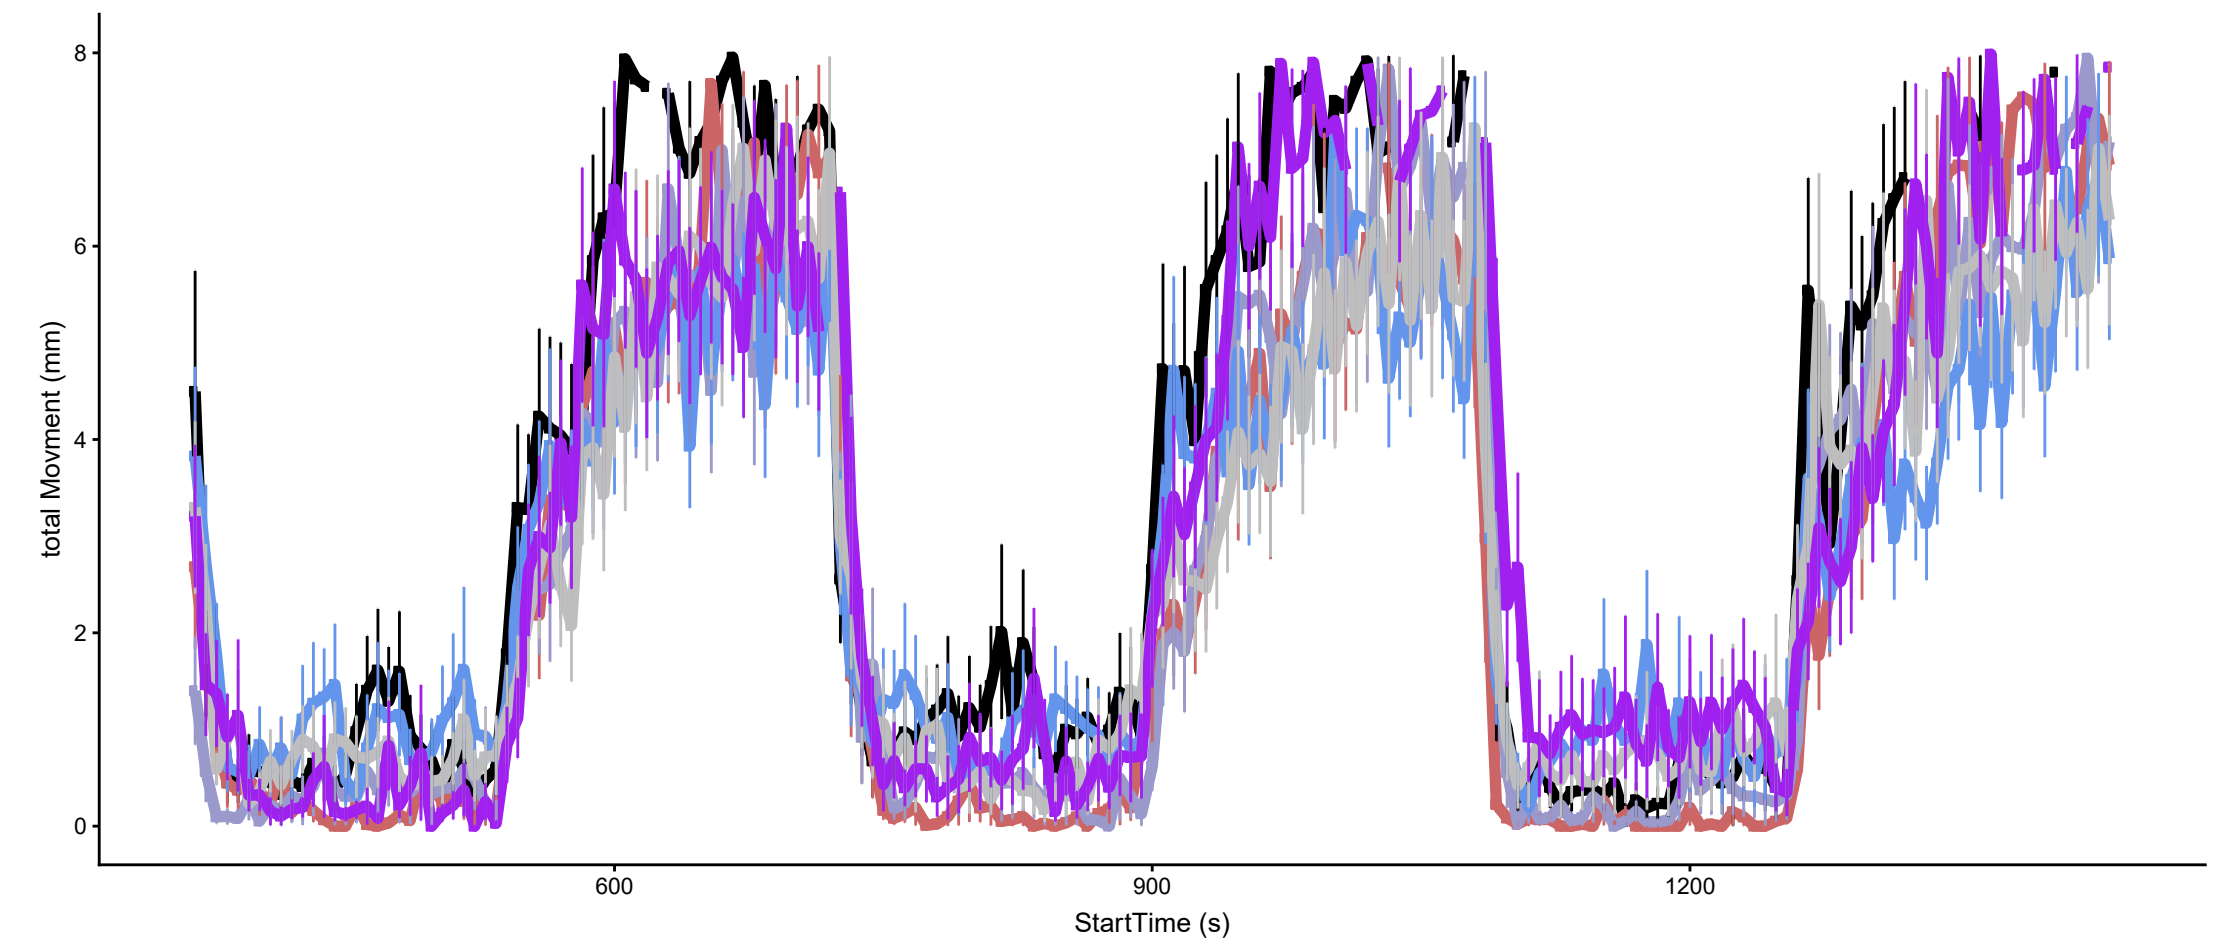

conc 0 10 23.2 50 75 100

# Napthalene

## Chorion on

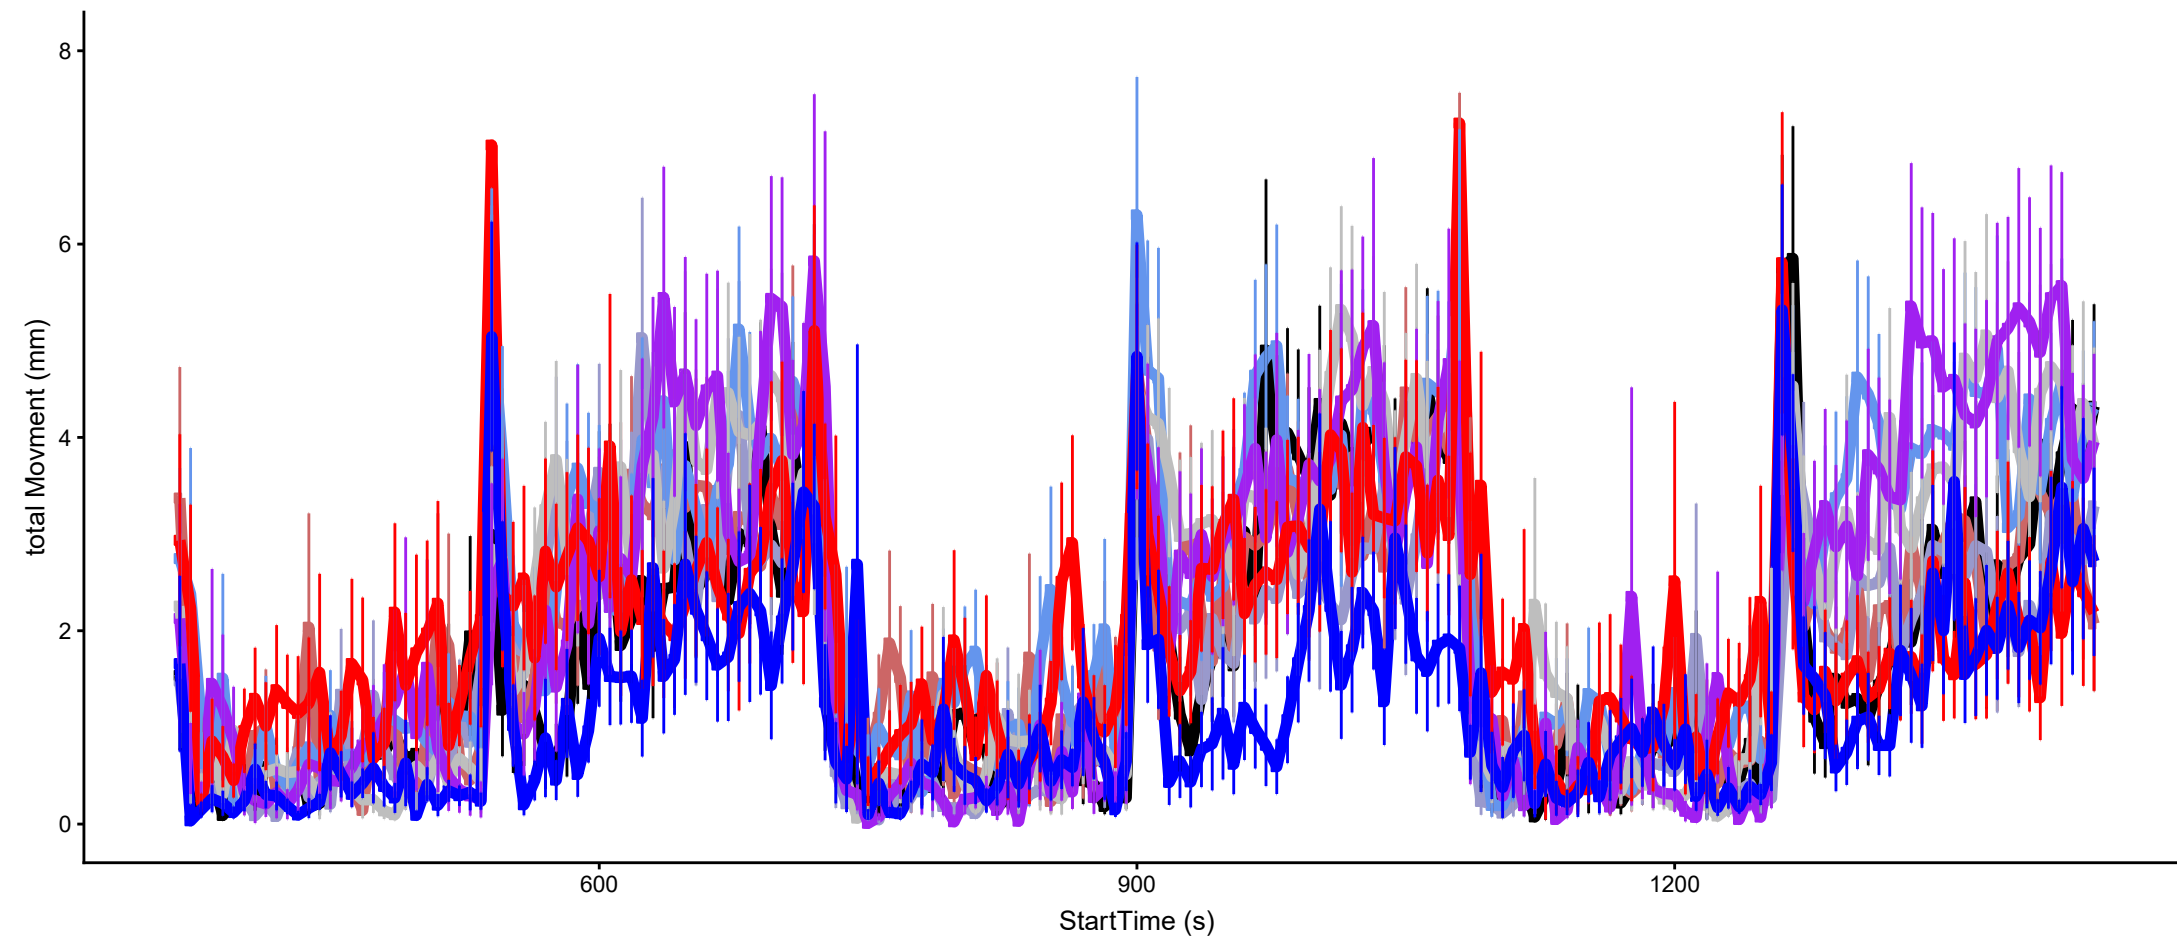

conc 0 2.54 16.4 74.8  
1 6.45 35 100

## Daily renewal

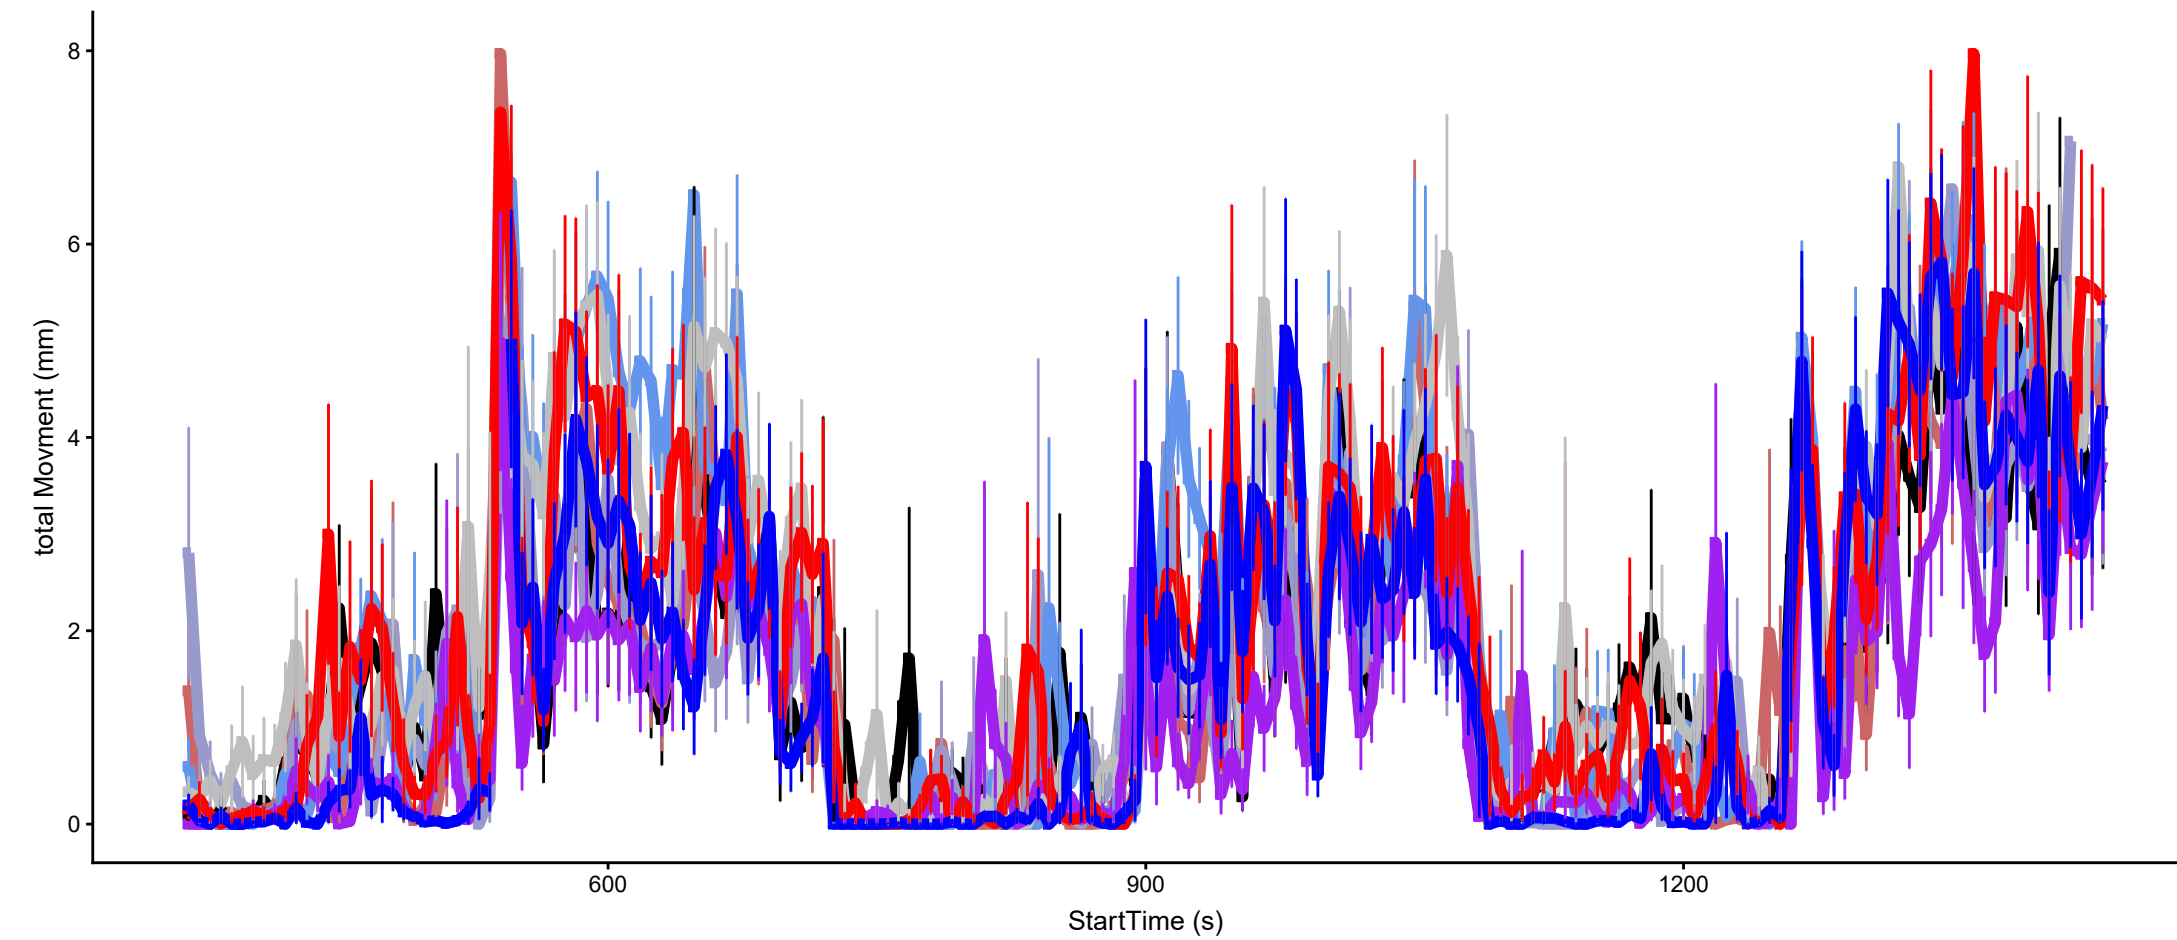

conc 0 2.54 16.4 74.8  
1 6.45 35 100

## Light/Dark

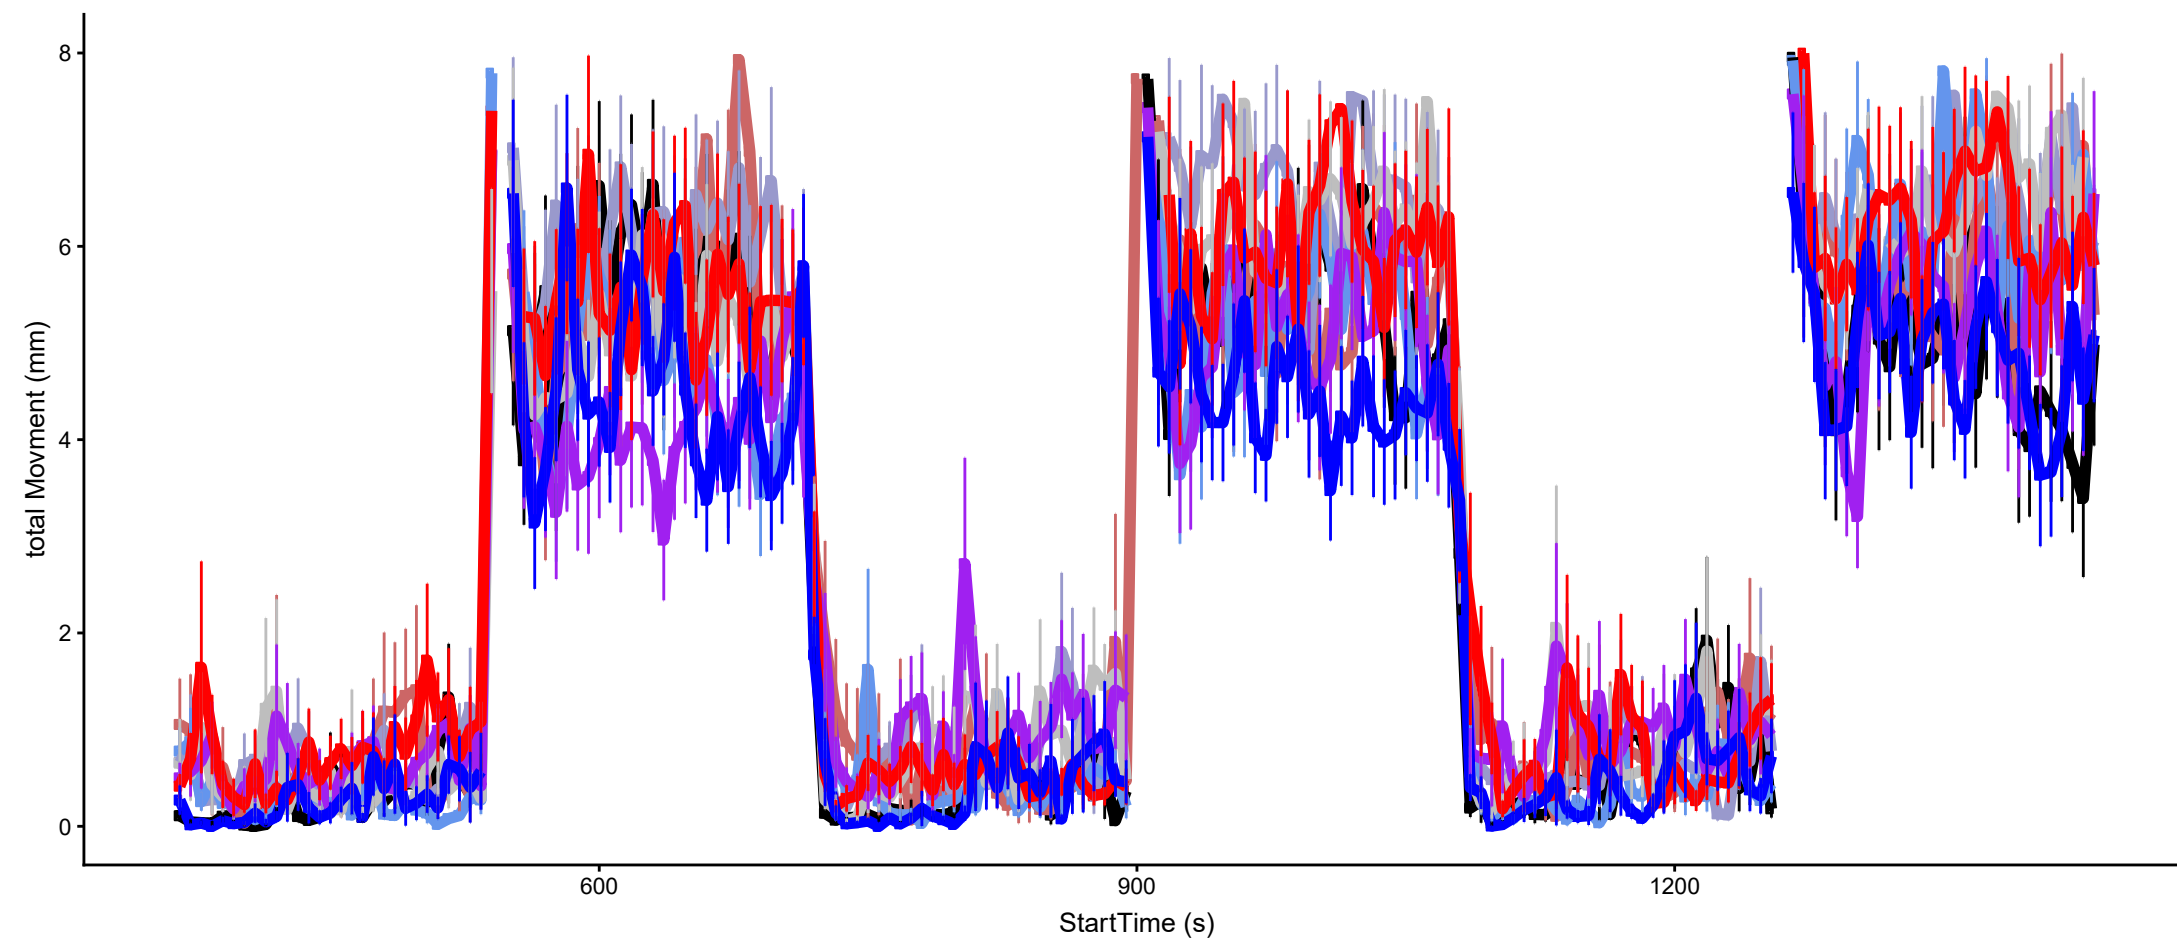

conc 0 2.54 16.4 74.8  
1 6.45 35 100

## Standard

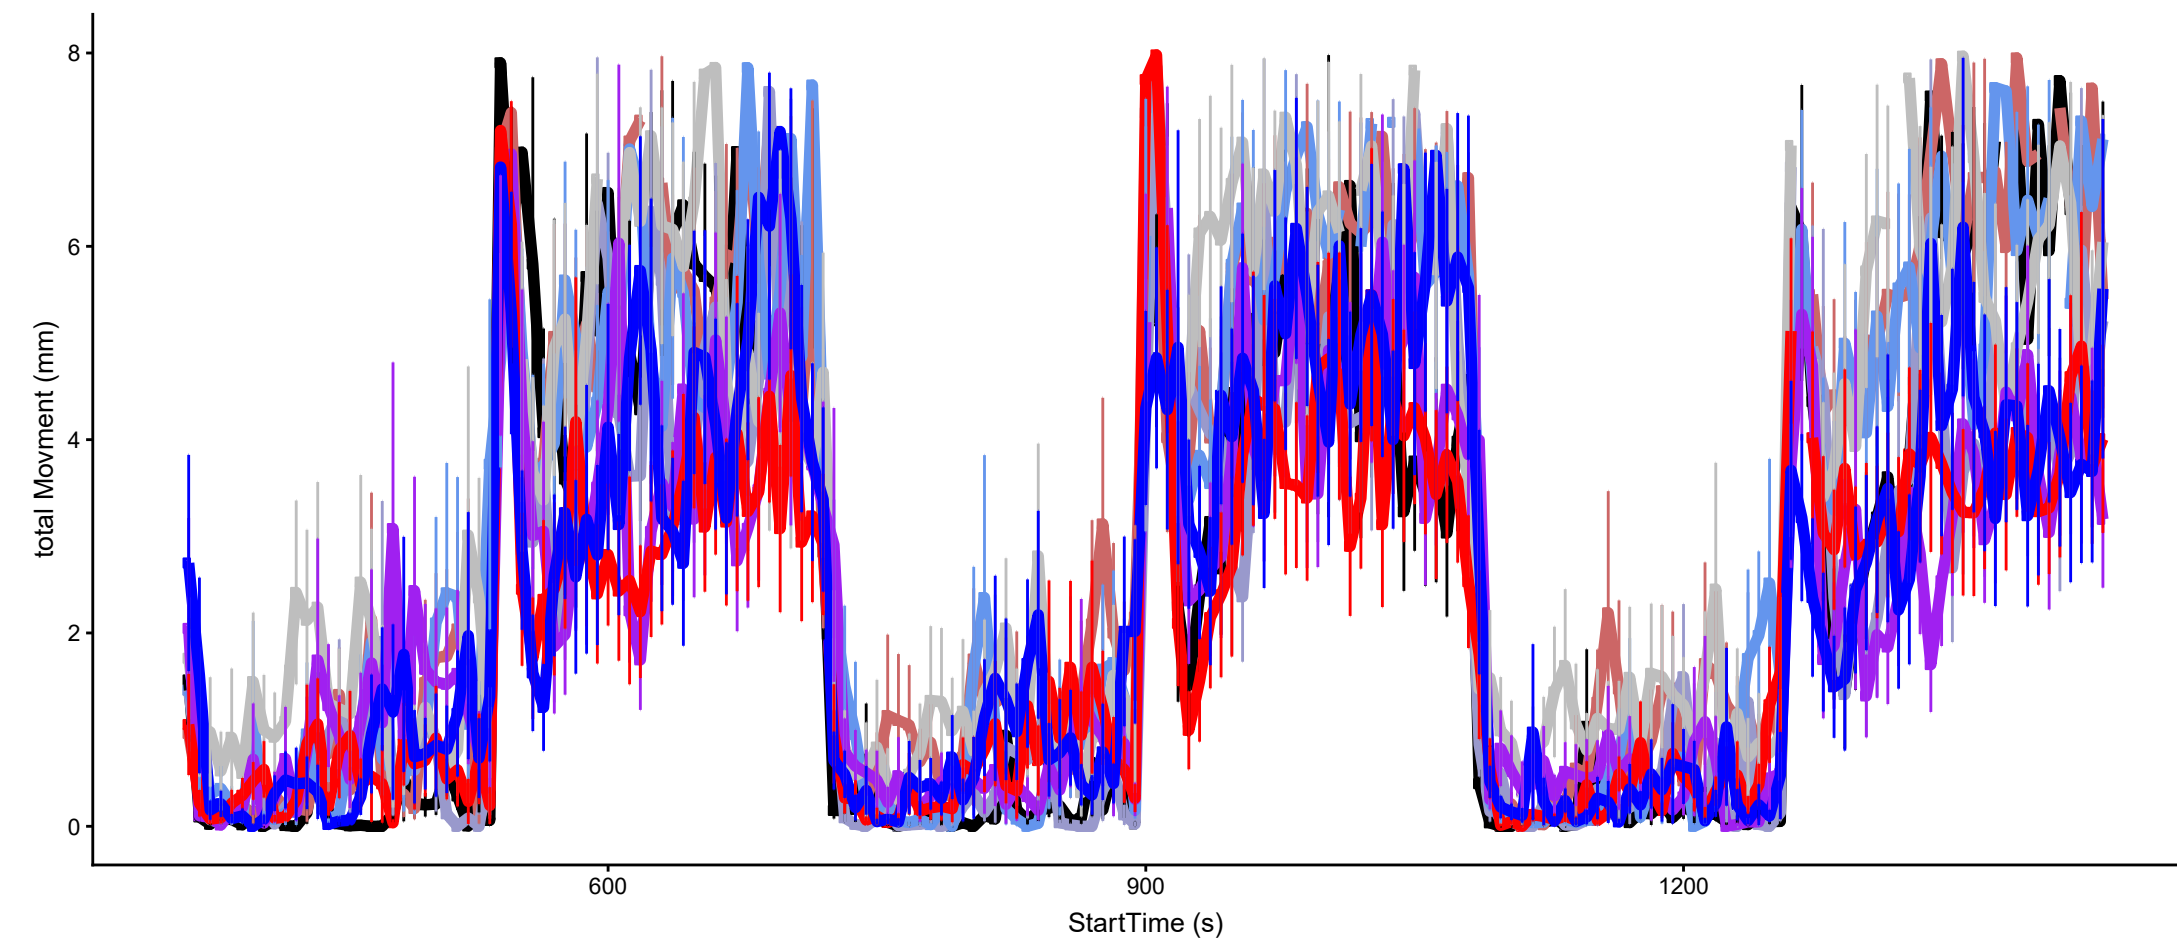

conc 0 2.54 16.4 74.8  
1 6.45 35 100

# Permethrin

## Chorion on

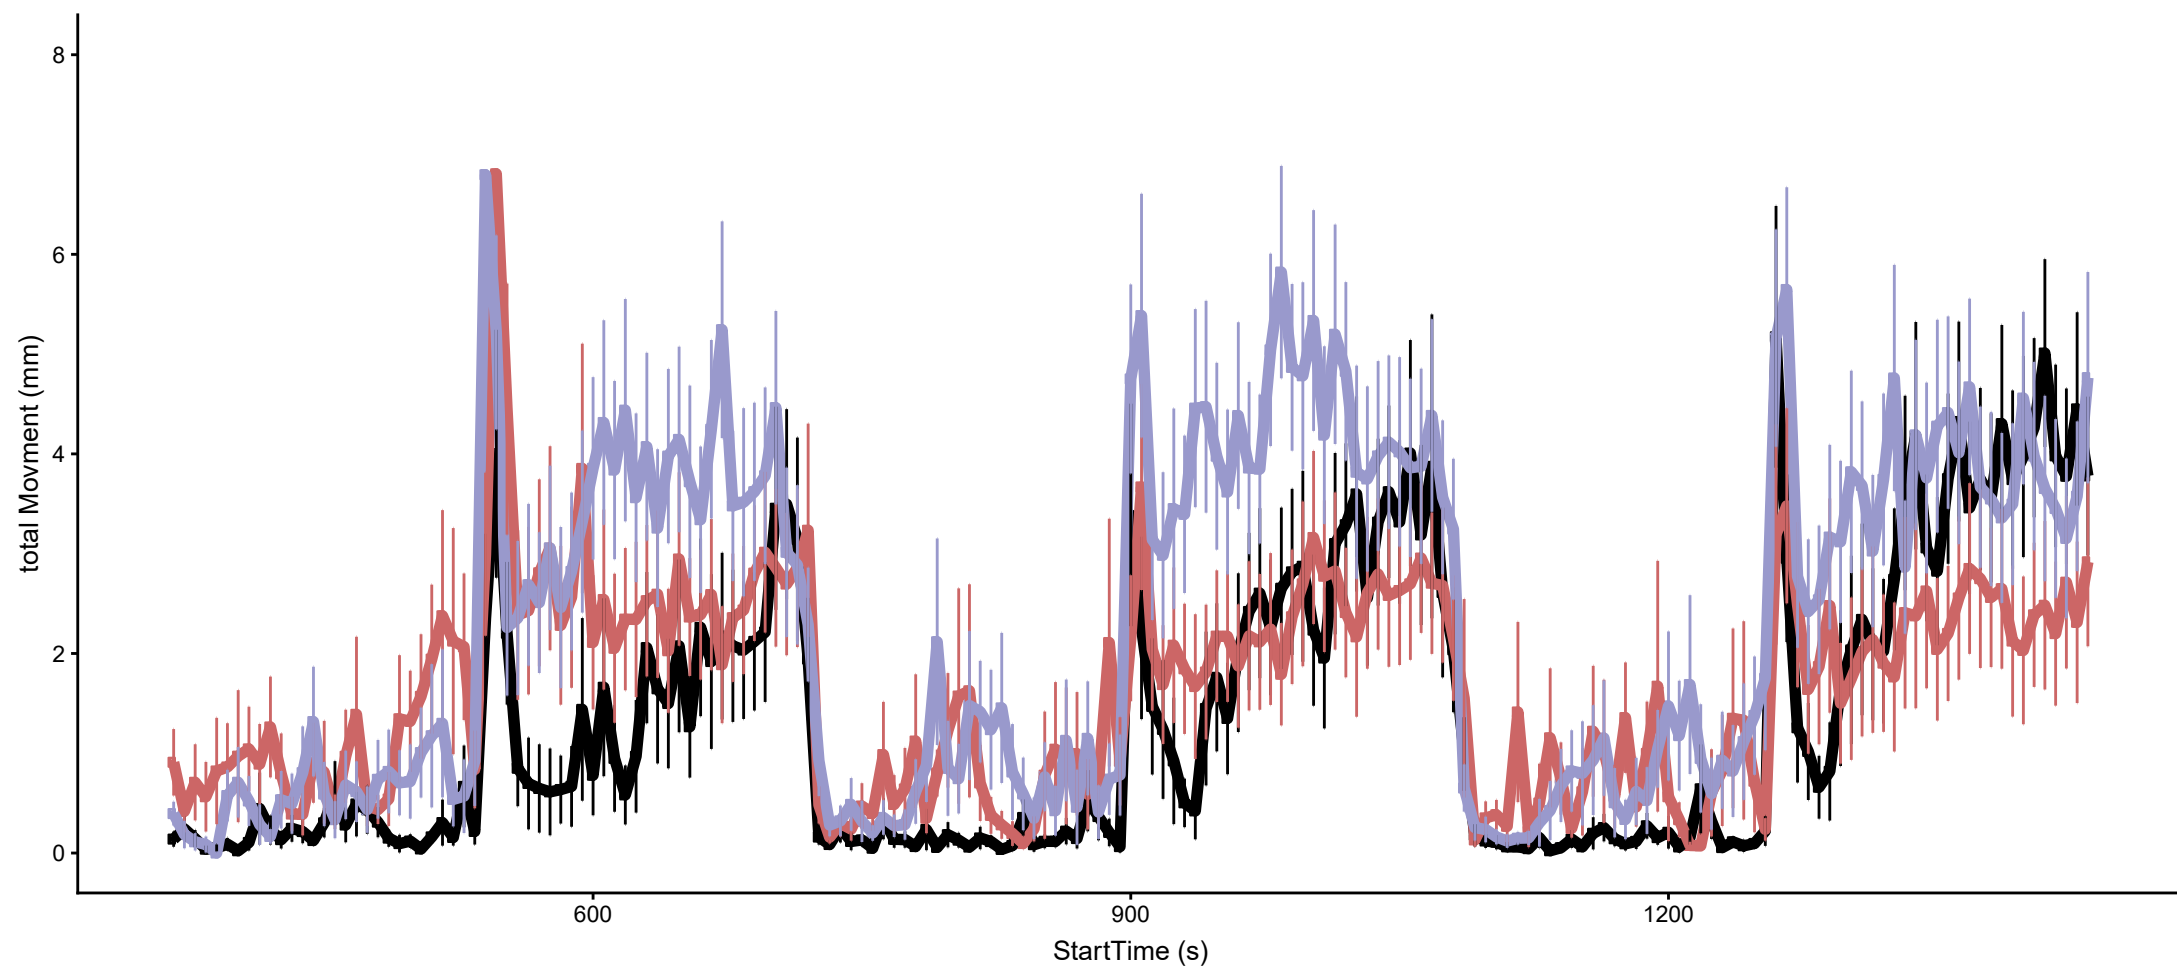

conc 0 1 2.54

## Daily renewal

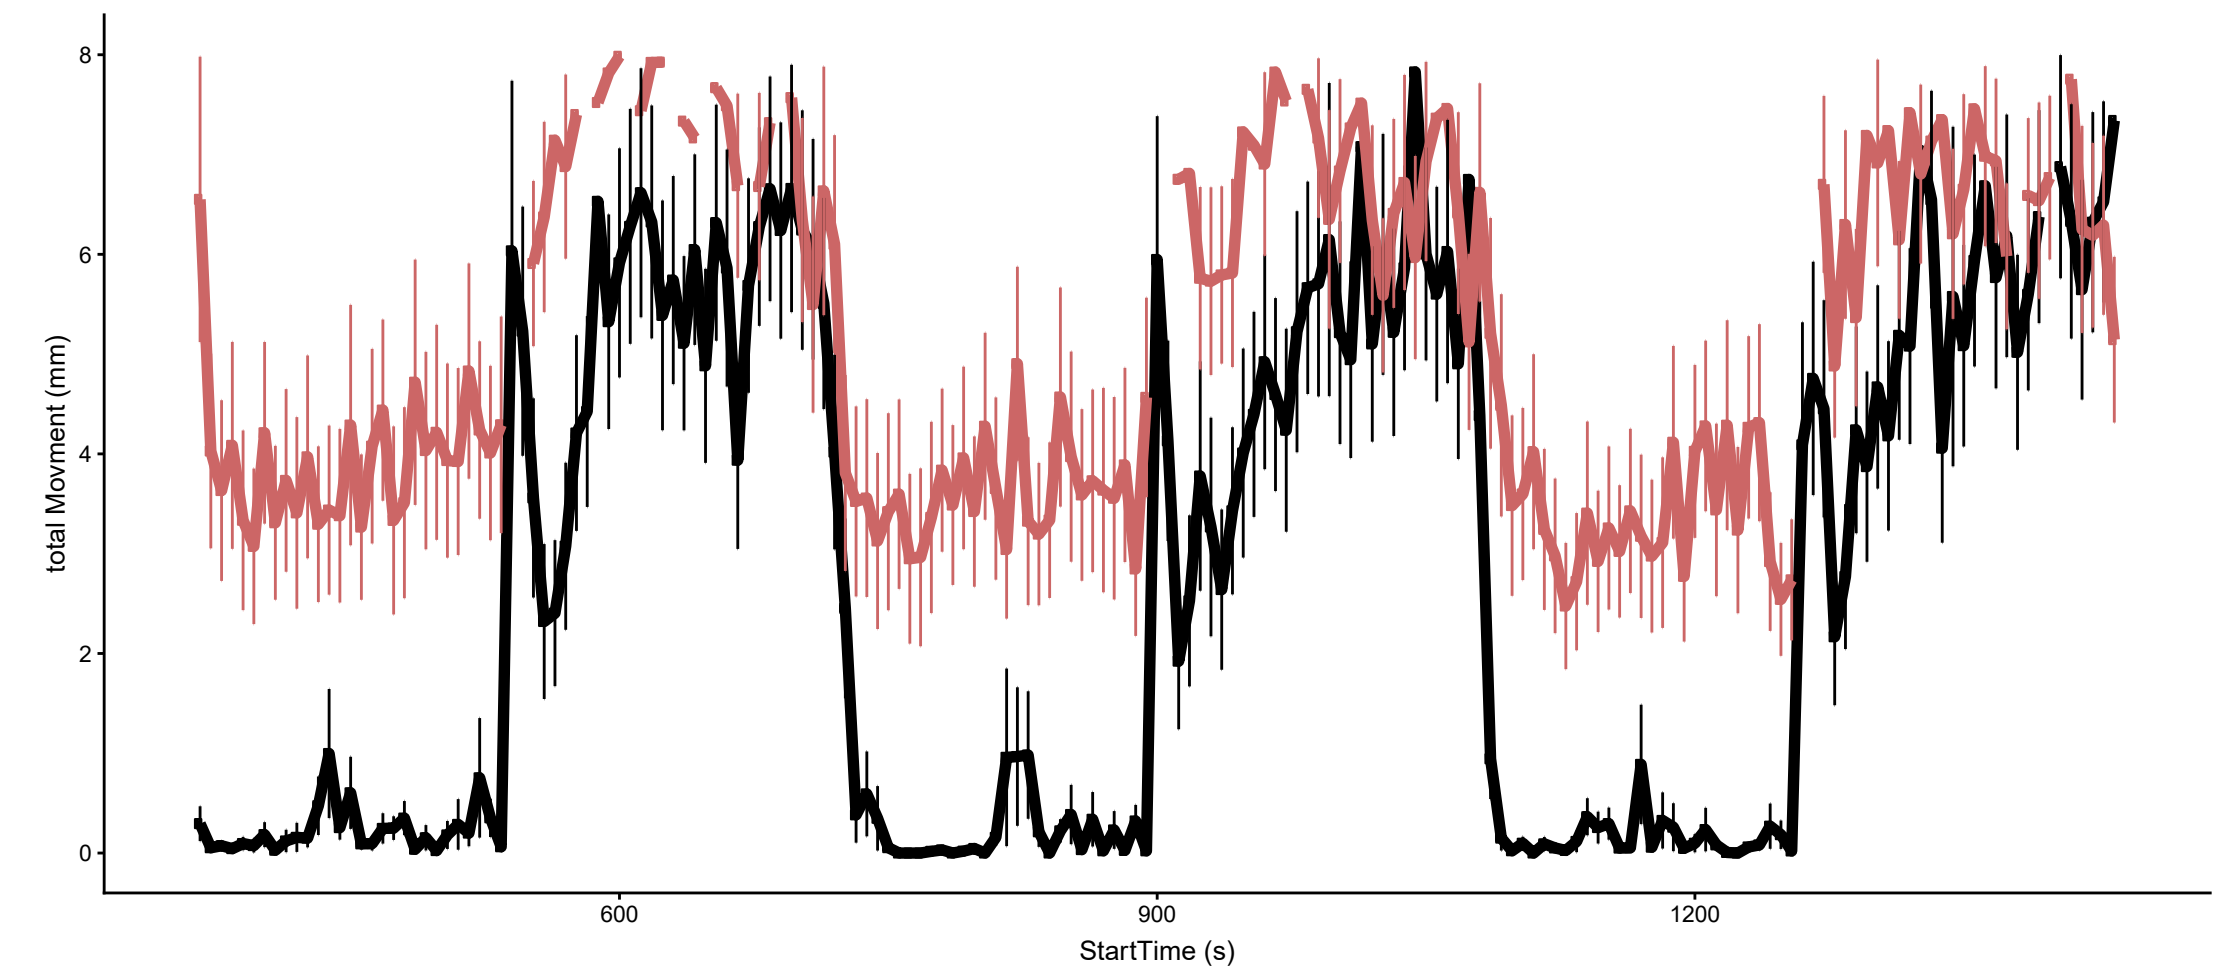

conc 0 1

## Light/Dark

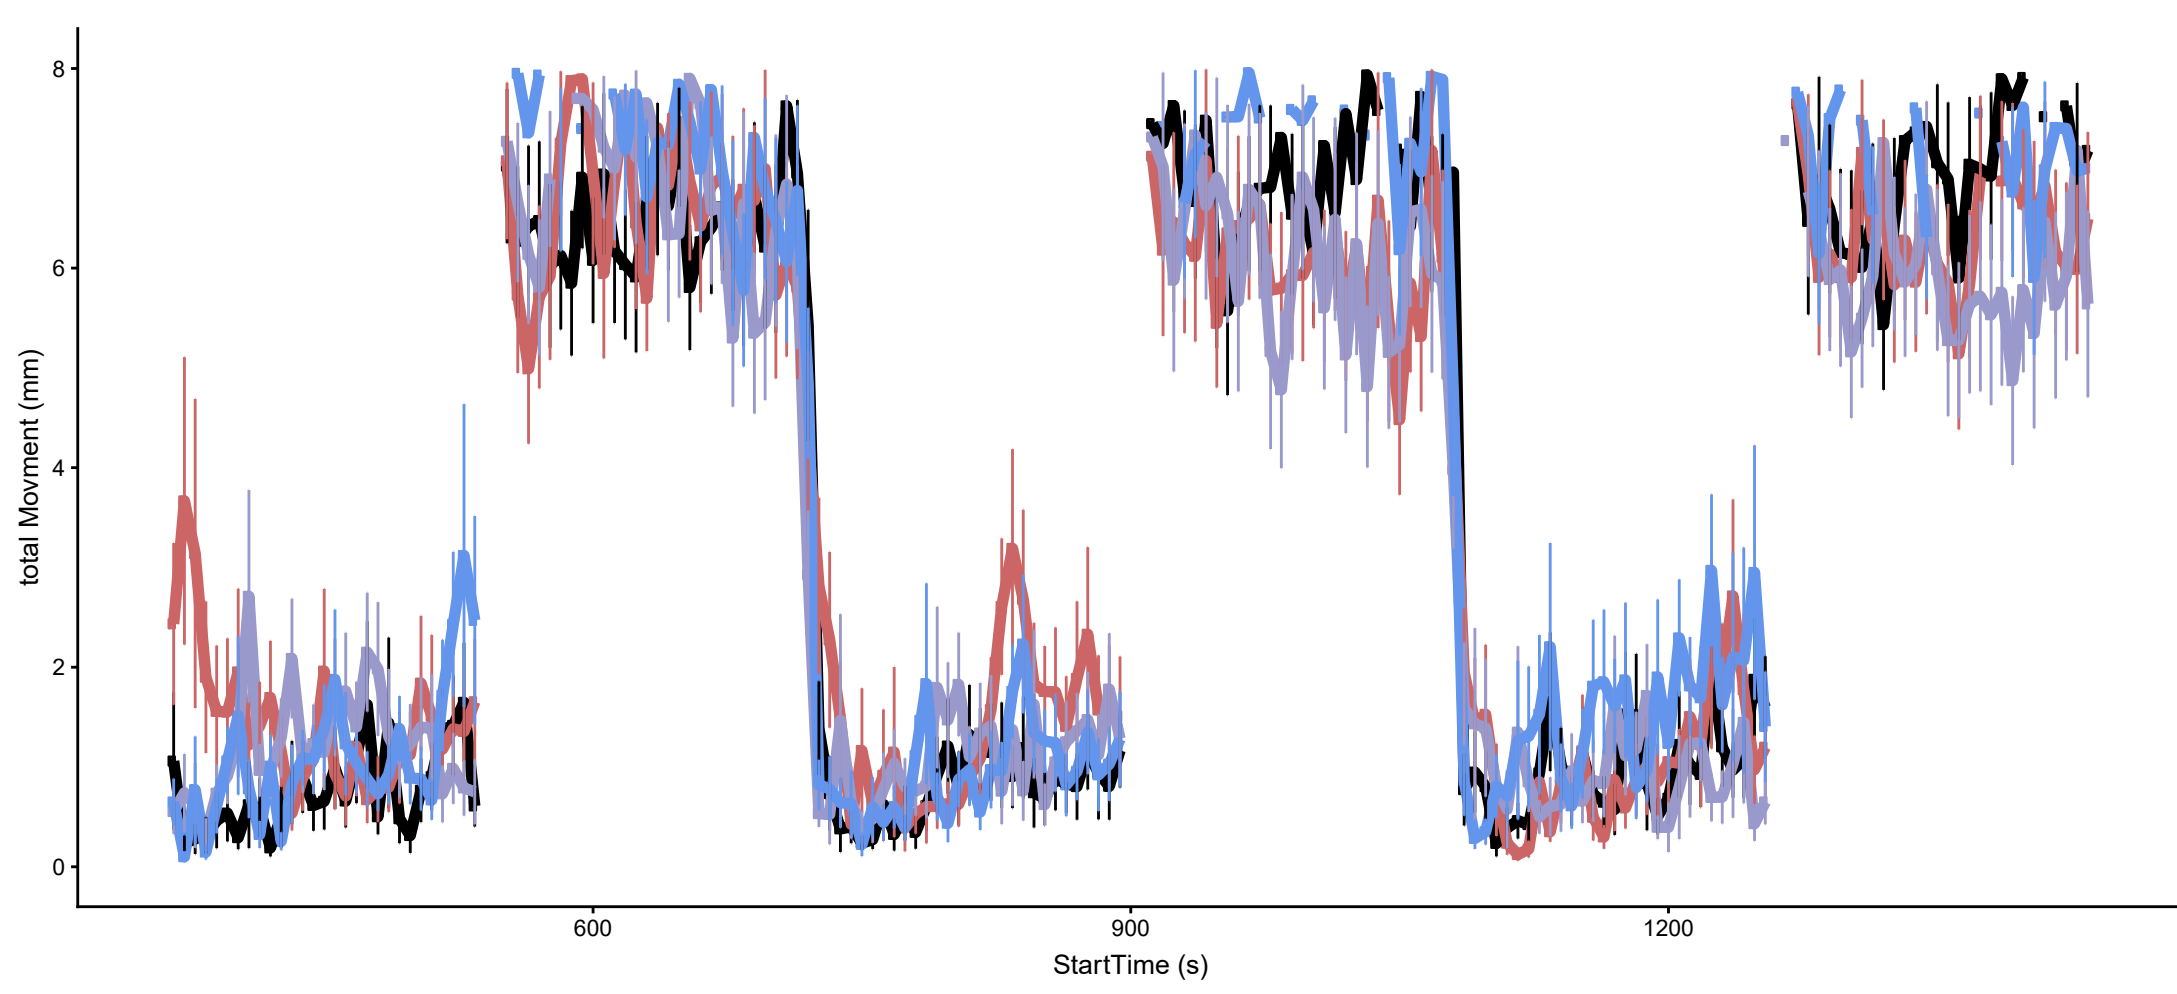

conc 0 1 2.54 5

## Standard

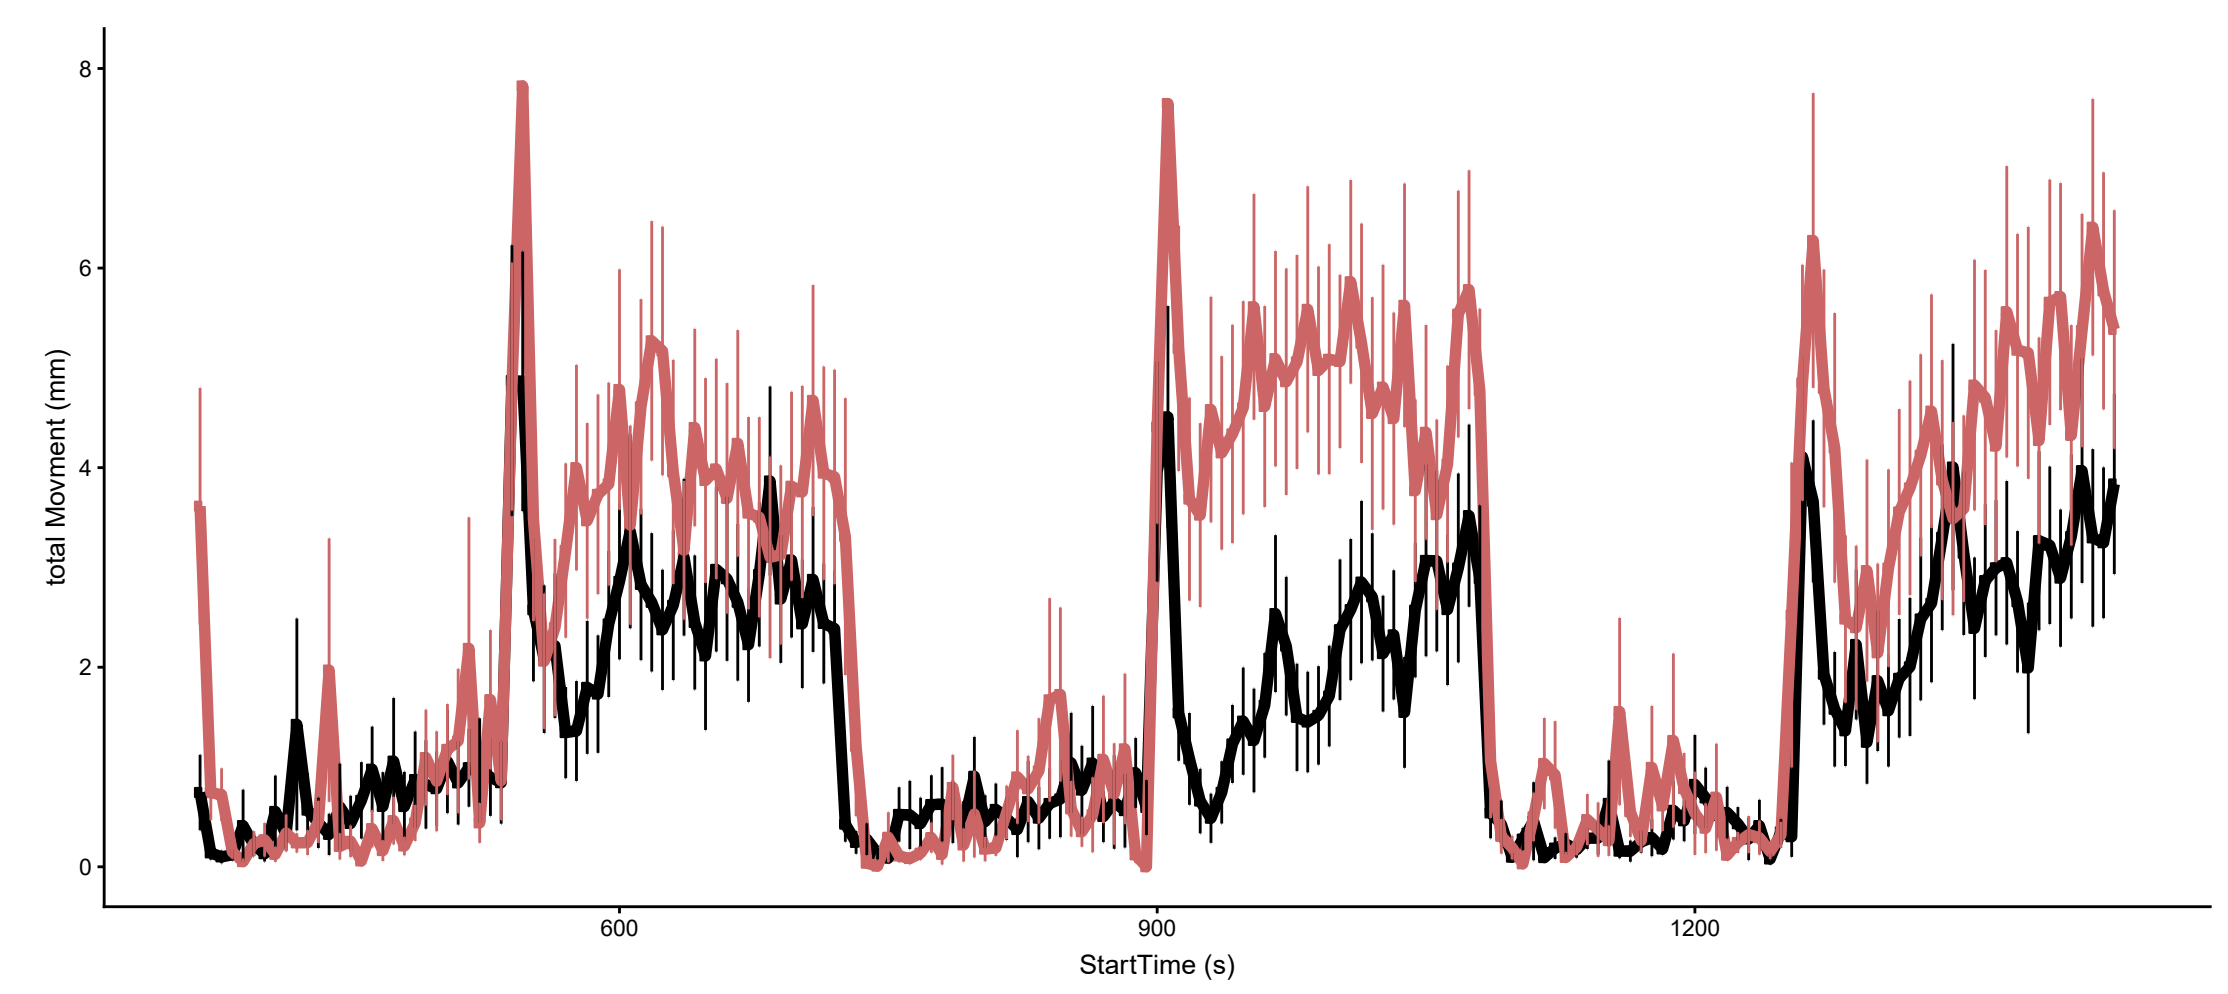

conc 0 2.54

# Pyrene

## Chorion on

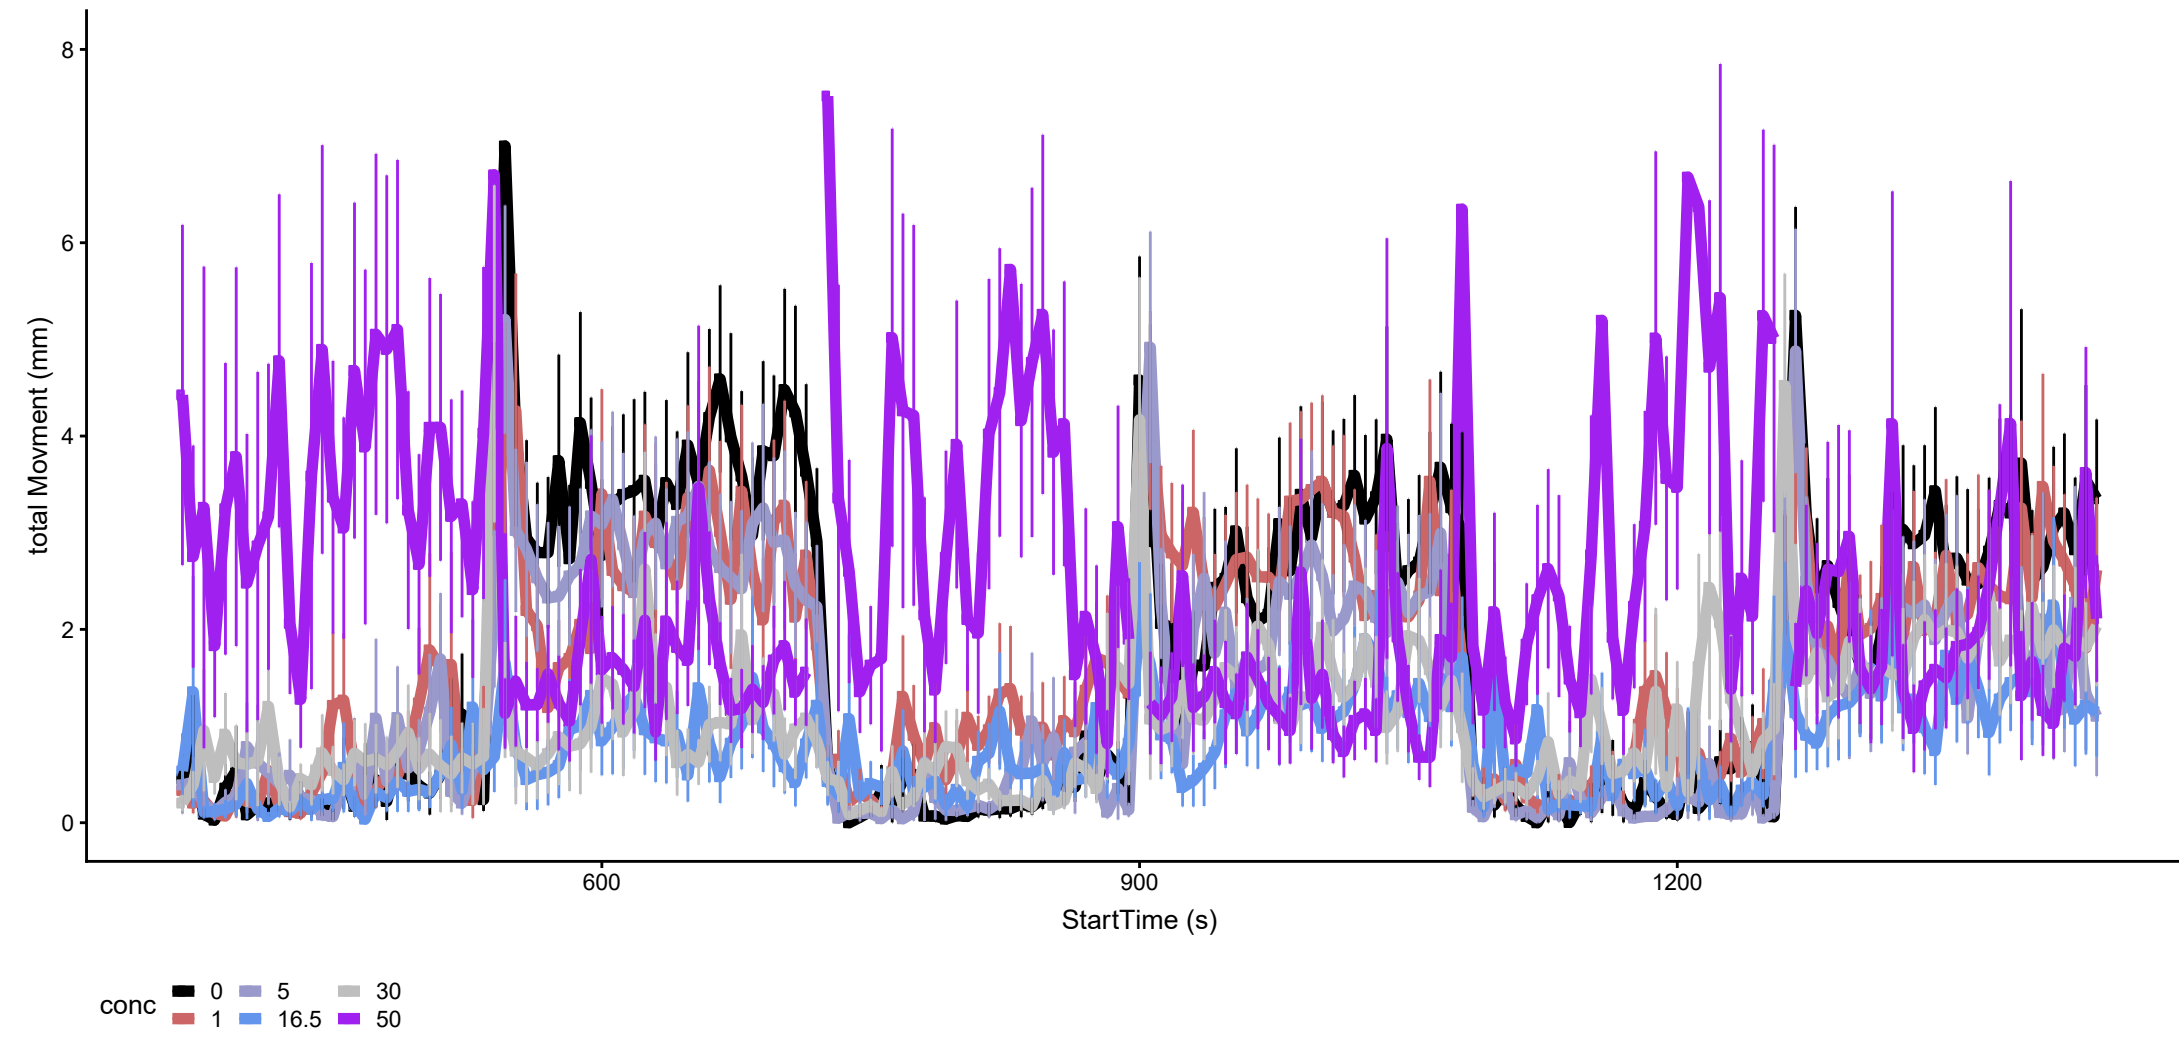

## Daily renewal

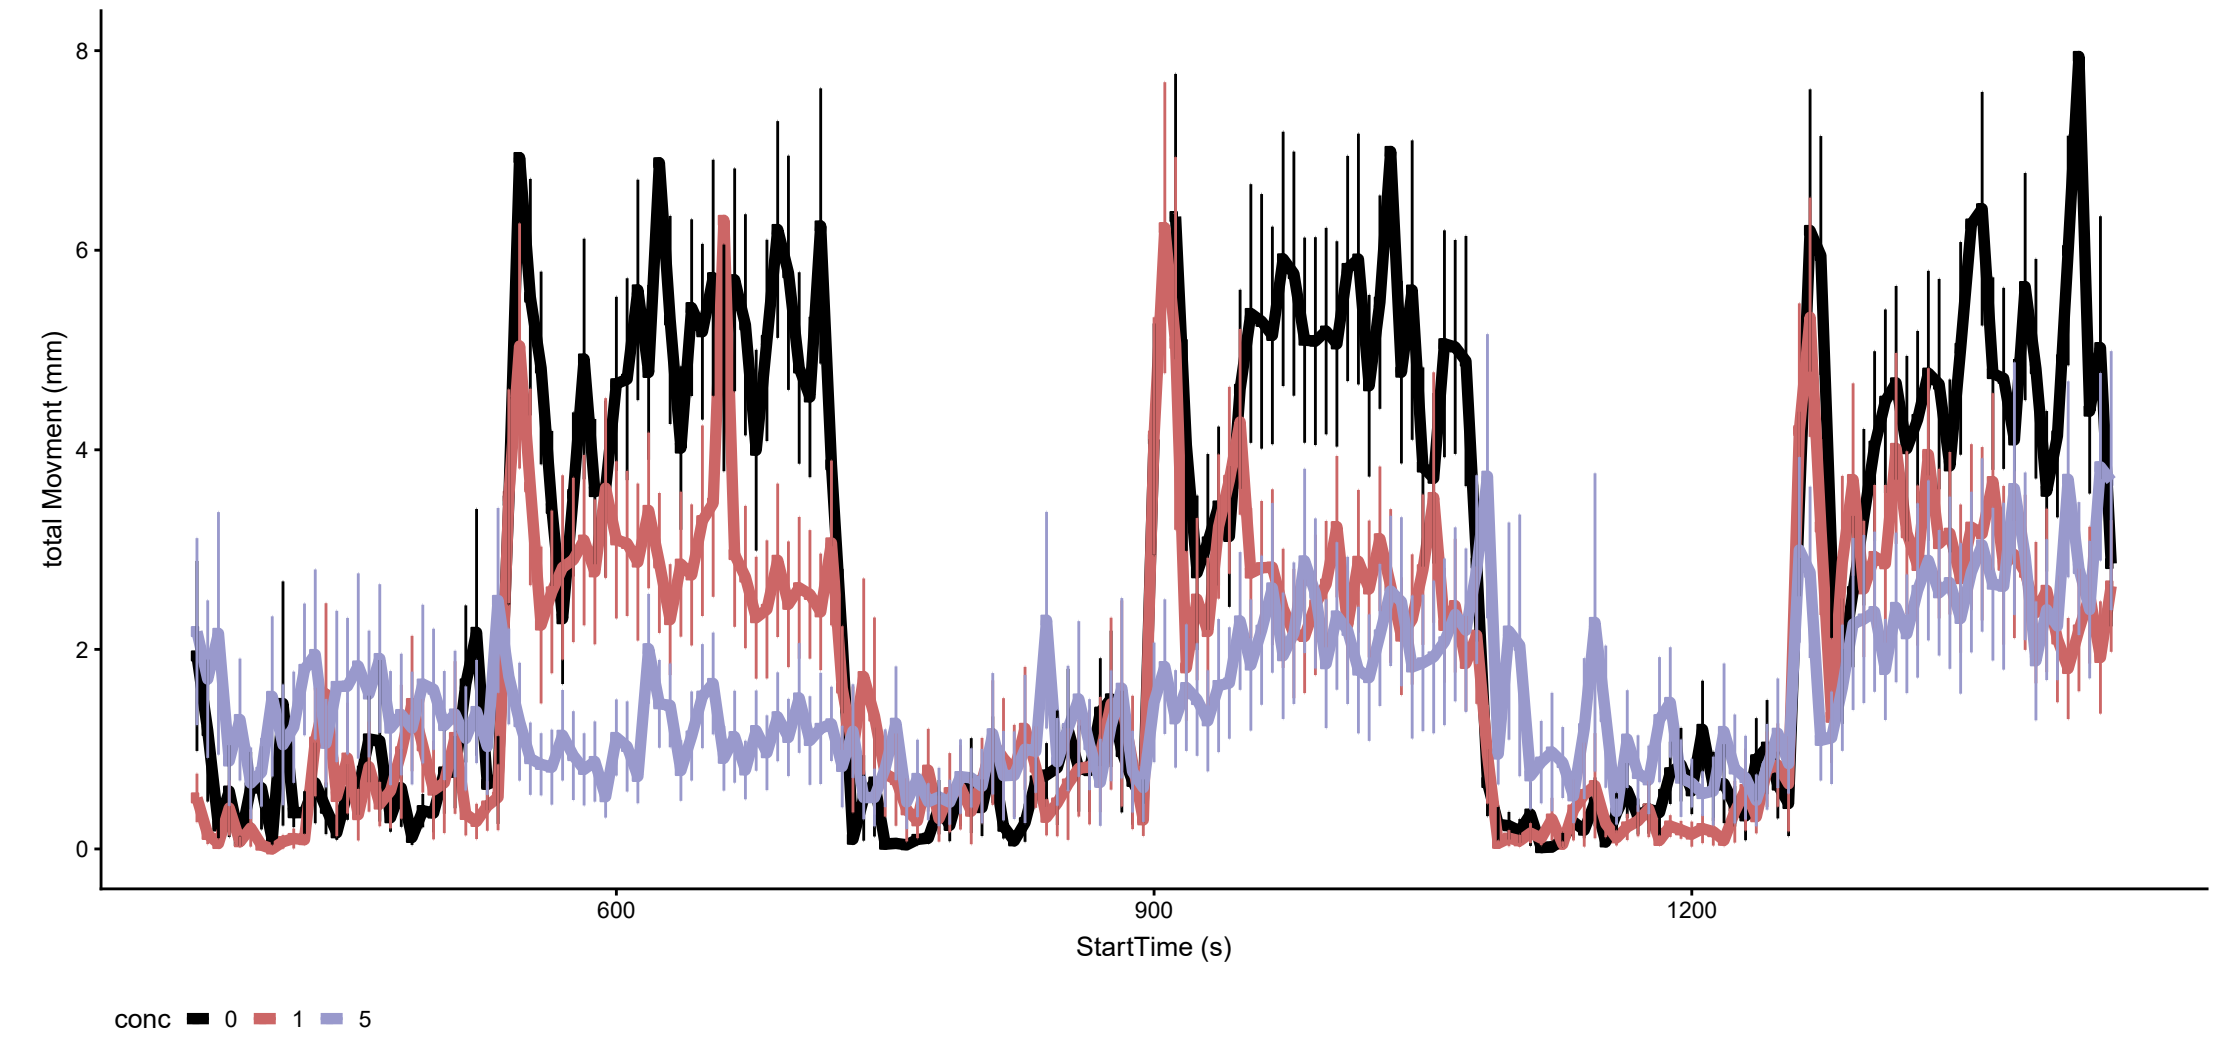

## Light/Dark

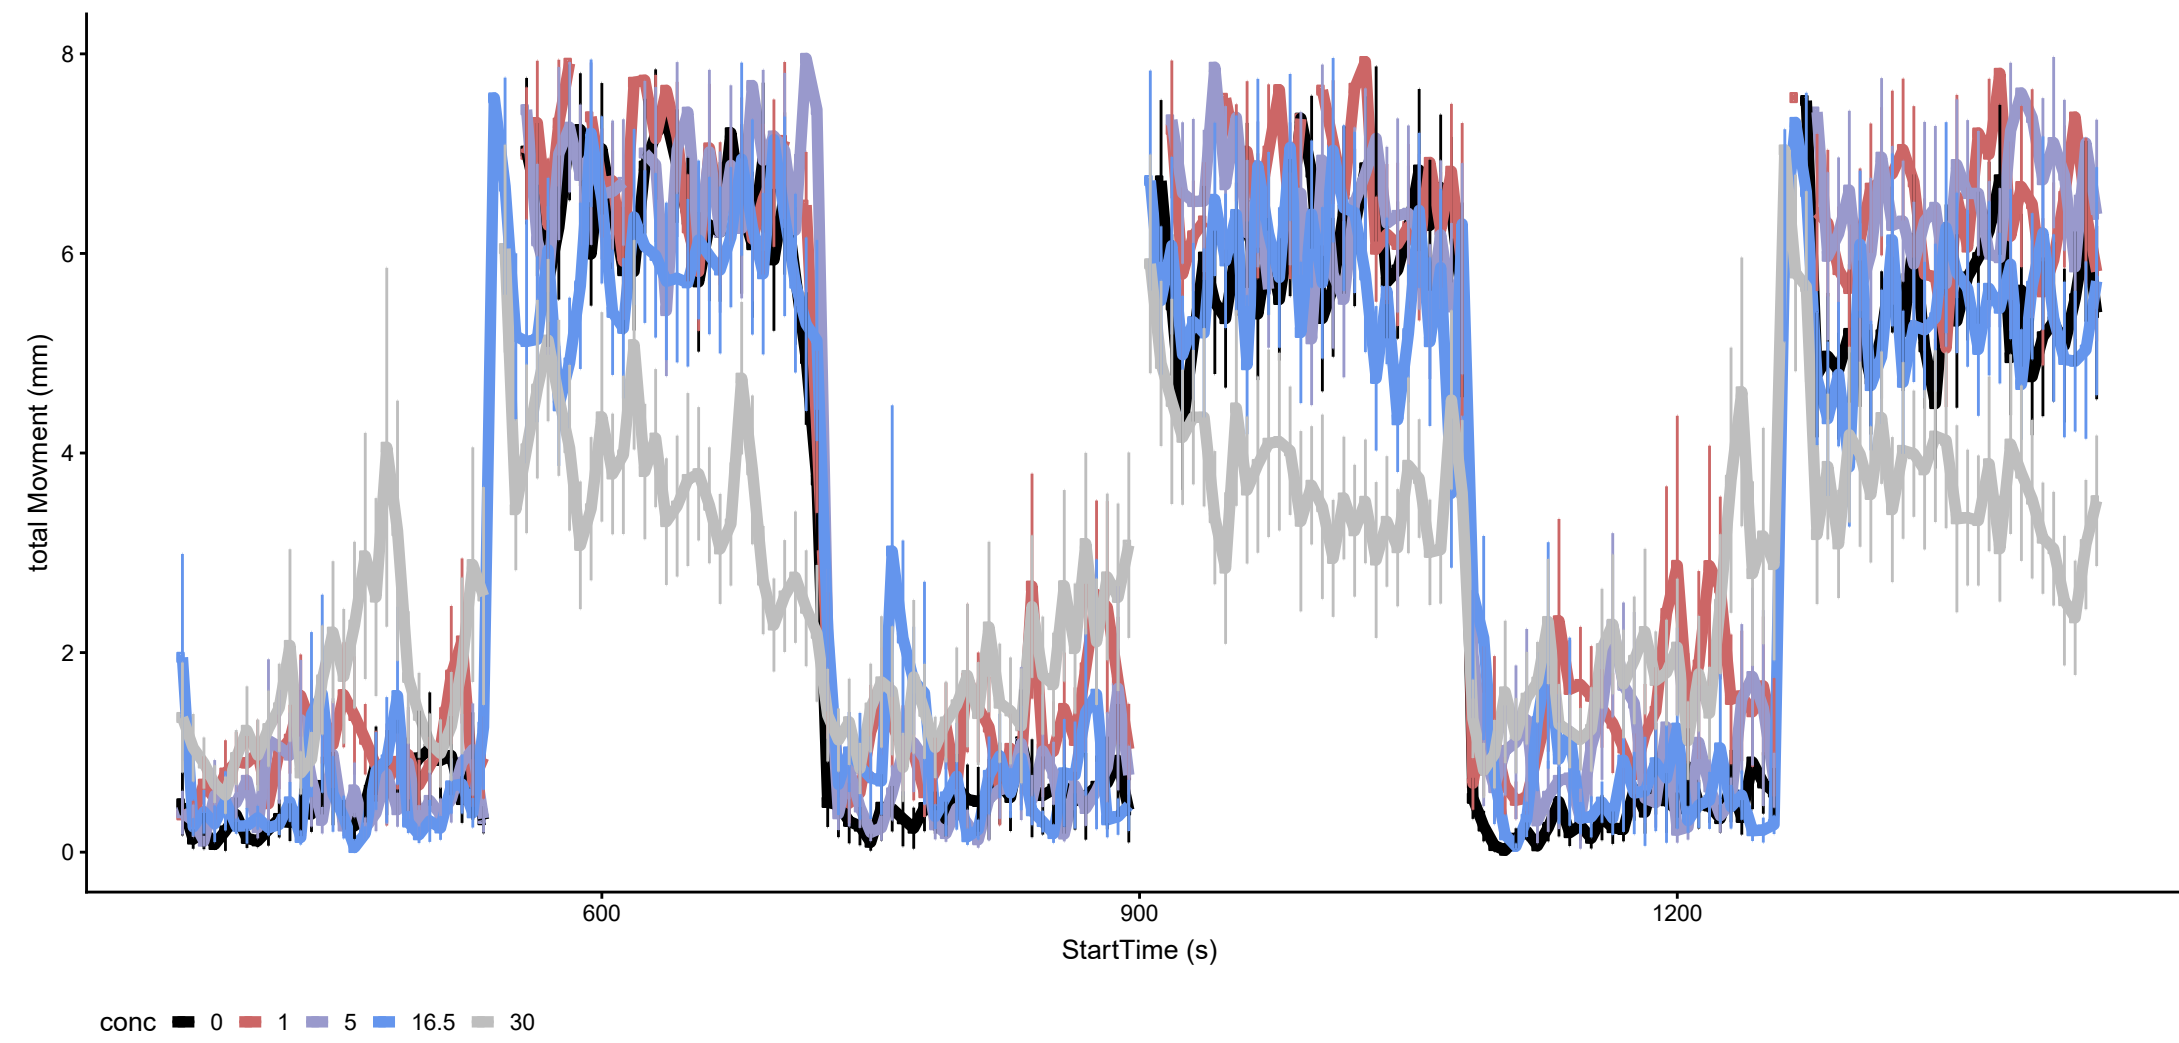

## Standard

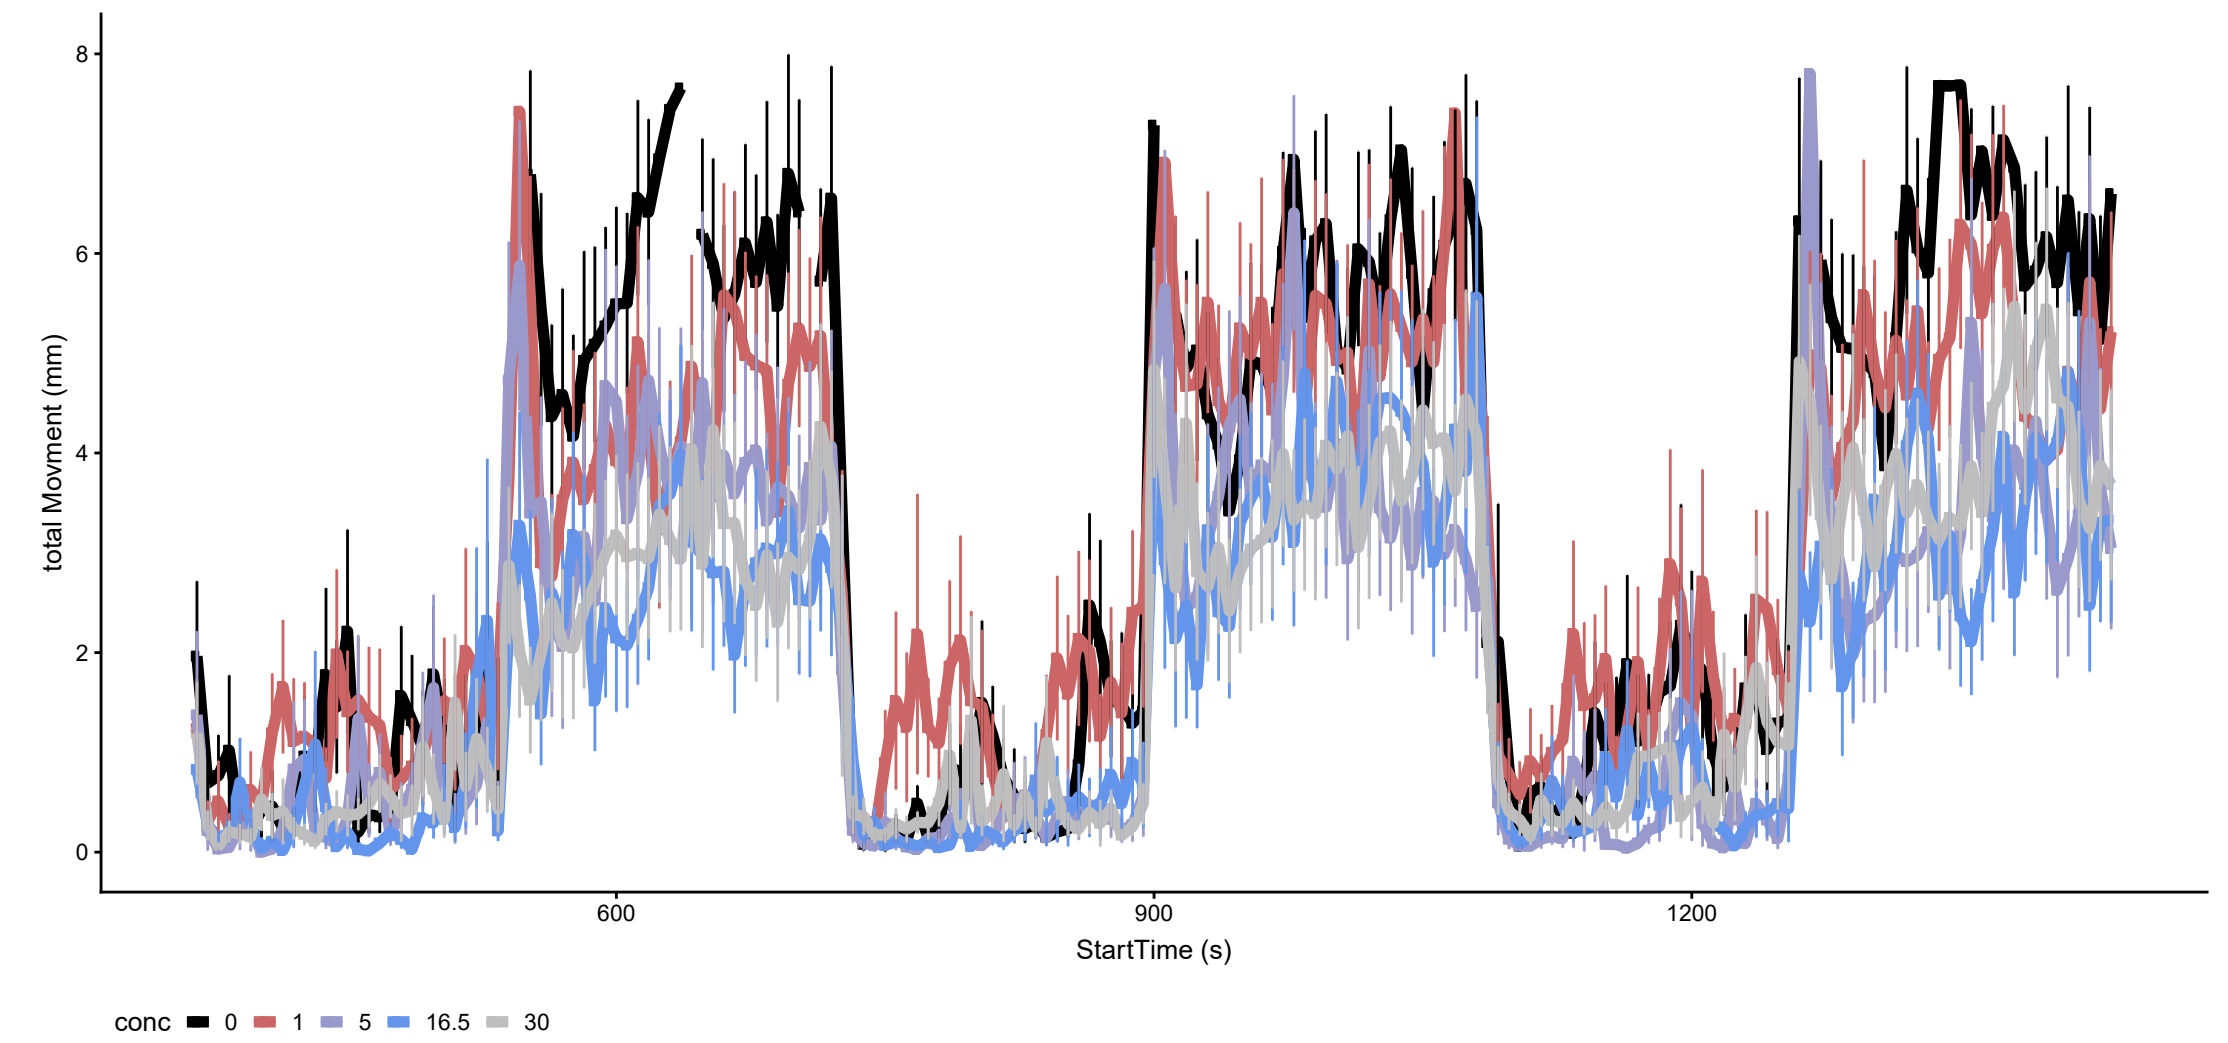

# Retene

## Chorion on

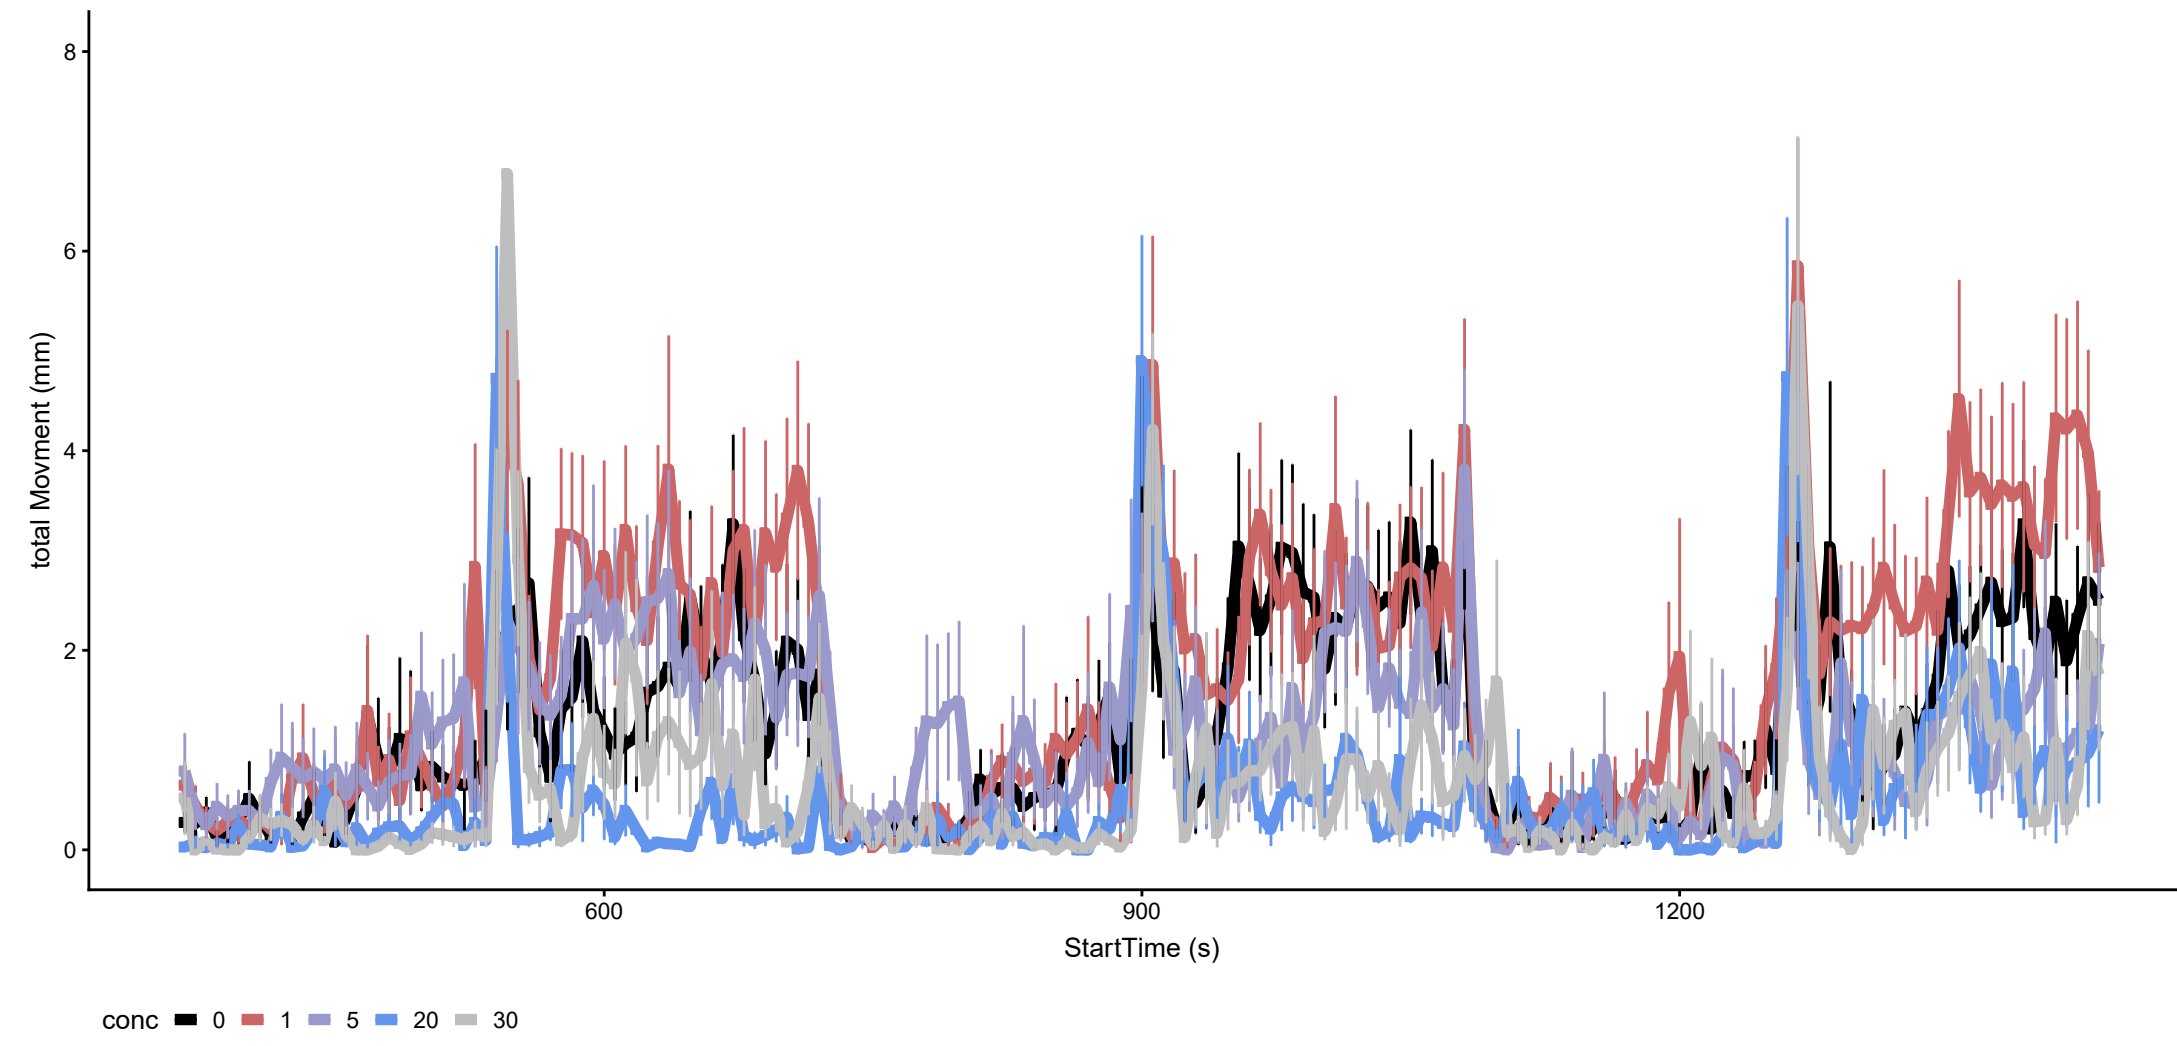

## Daily renewal

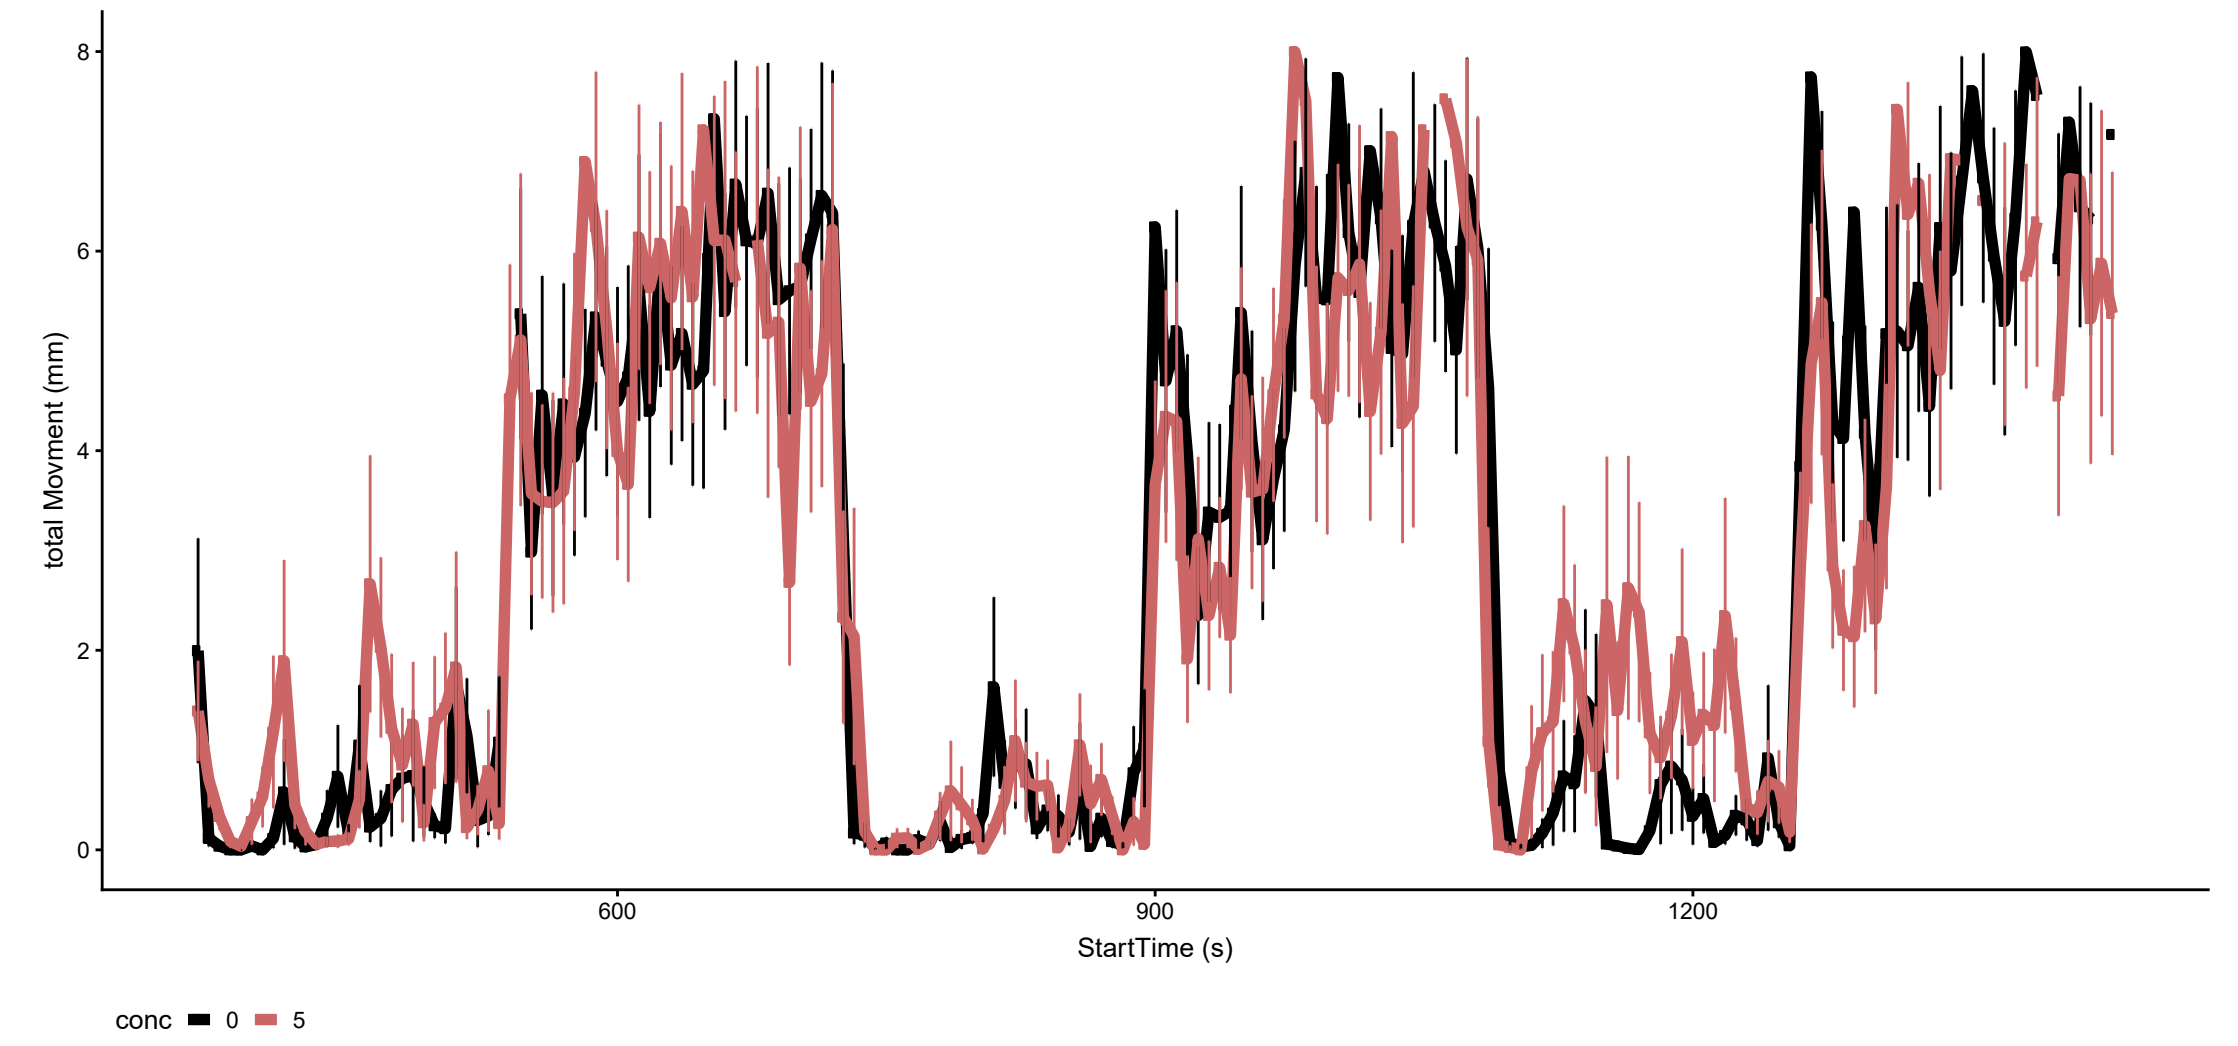

## Light/Dark

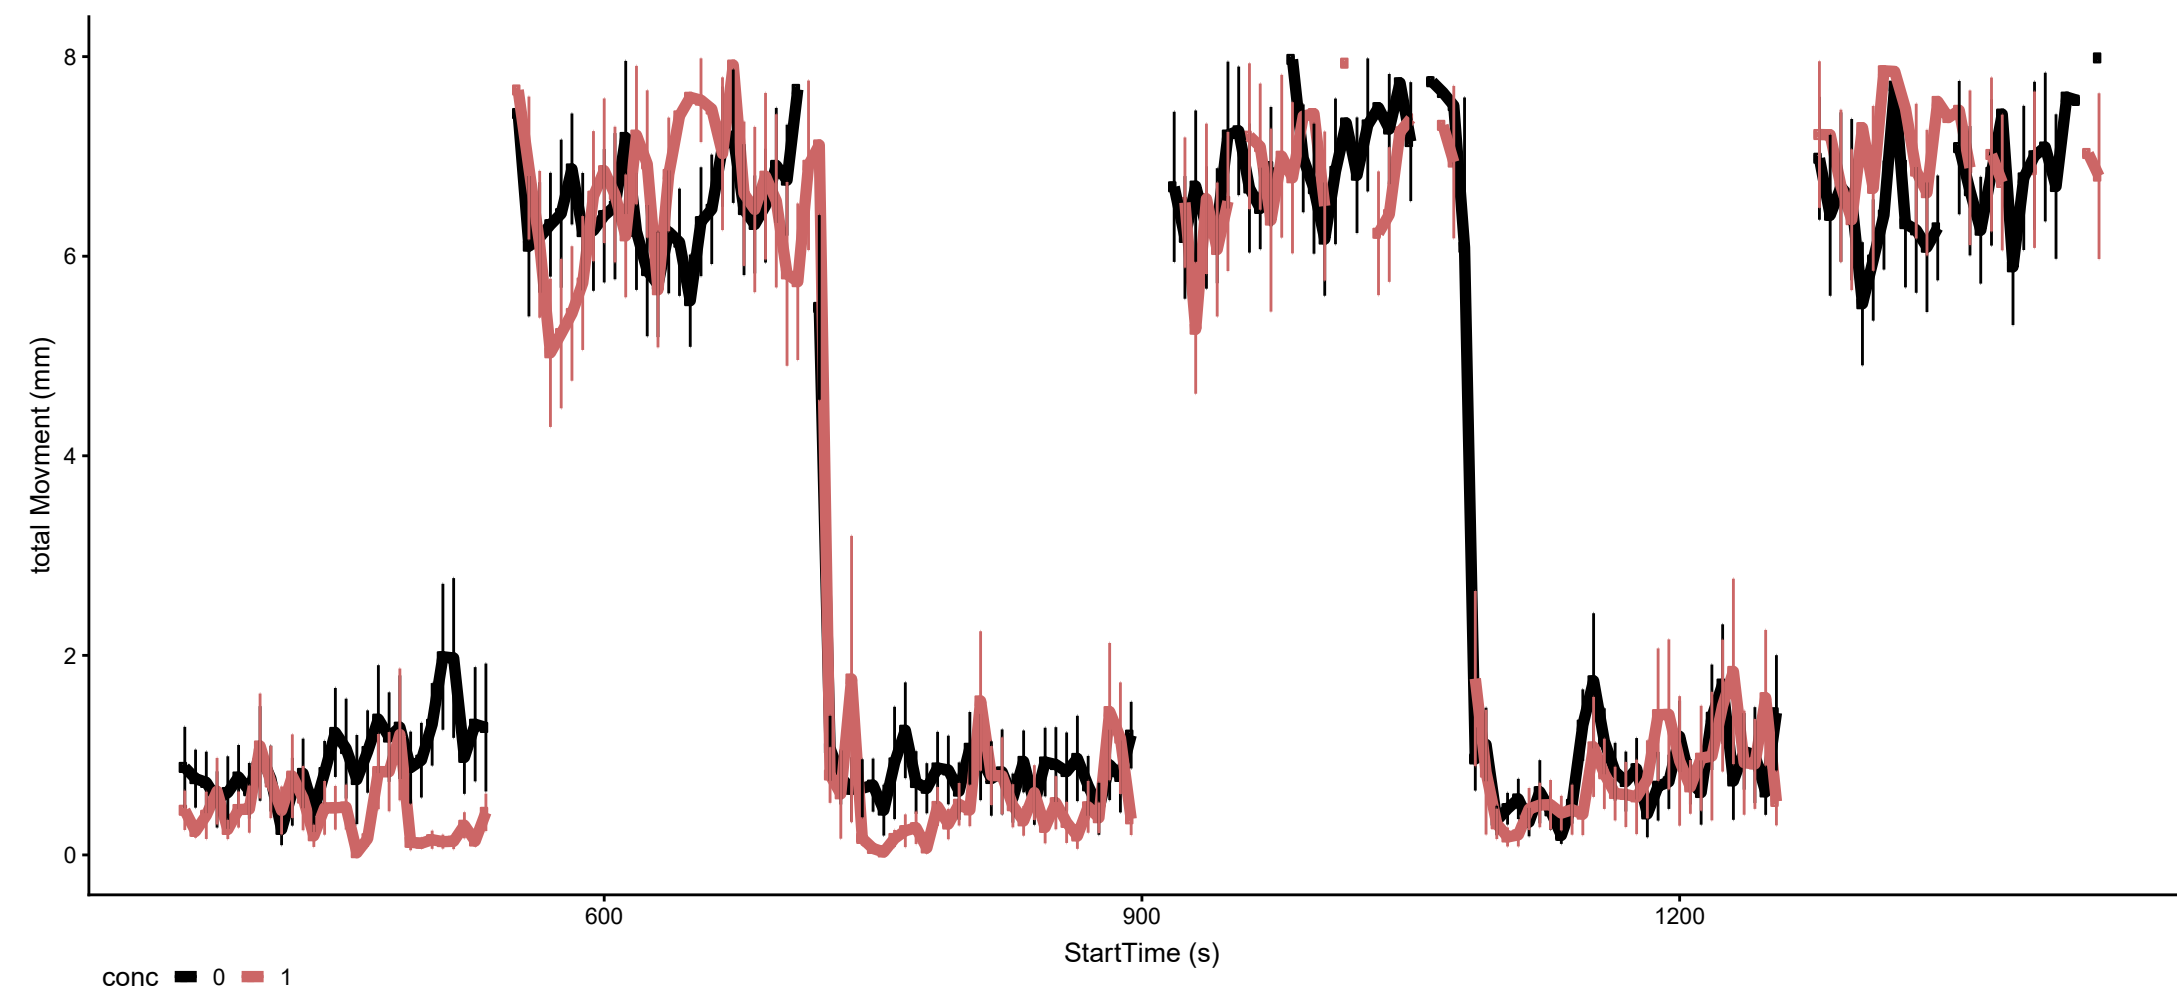

## Standard

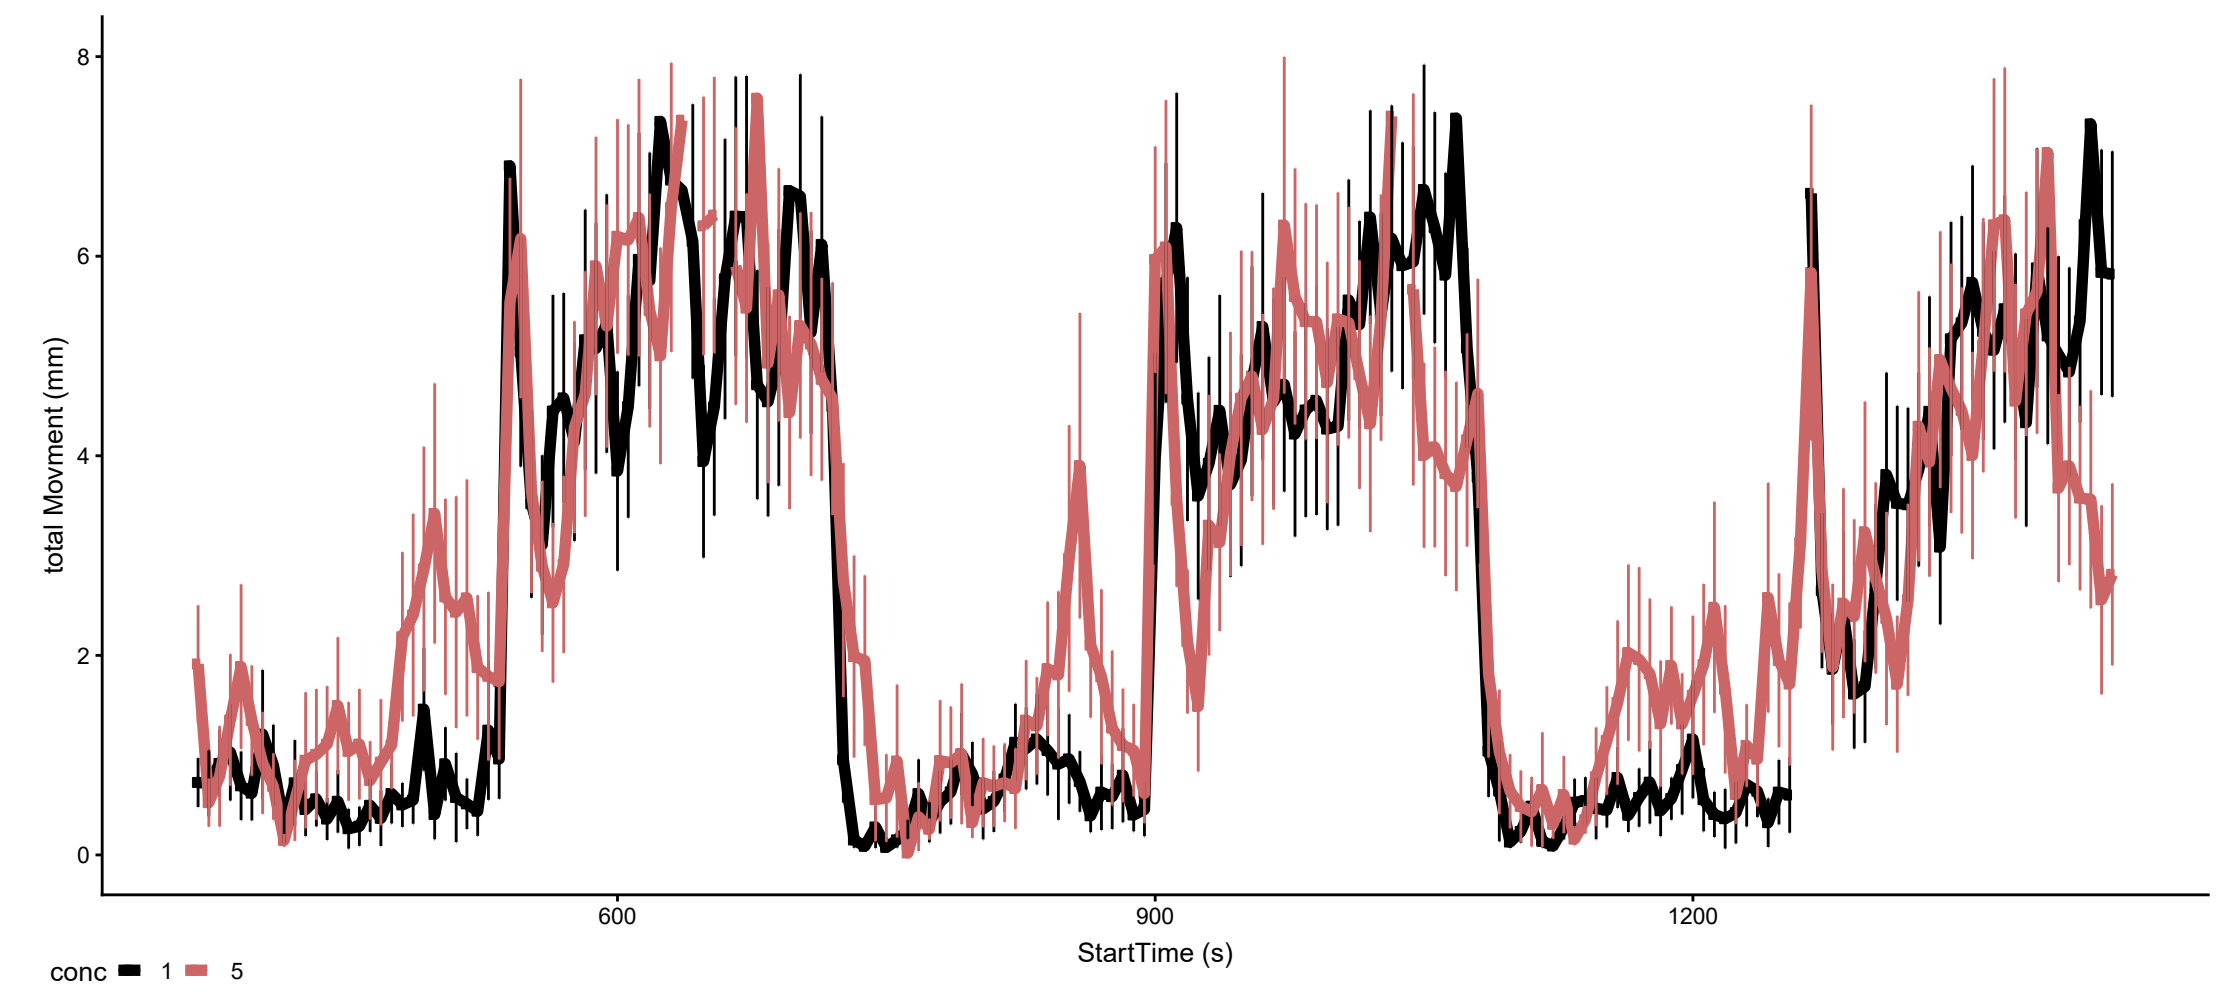

**Figure S3.** Larval photomotor response (LPR) compiled data. Each panel shows total movement (mm) vs. time. Each panel shows three light-dark cycles. For all chemicals, units are micromolar. For MWCNTs, concentrations are micrograms per milliliter. Data for concentrations resulting in less than 70% normally-developed fish were not analyzed.
